# Supplementary material for: Antigen uptake and immunoadjuvant activity of pathogen-mimetic hollow silica particles conjugated with β-glucan
Source: Royal Society of Chemistry journal article supplement (doi:10.1039/c8tb02129e), 2018-01-01
Supplement: c8tb02129e1.pdf [file c8tb02129e1.pdf]

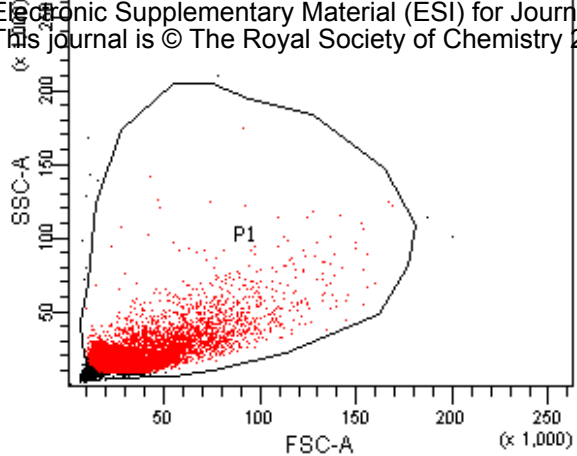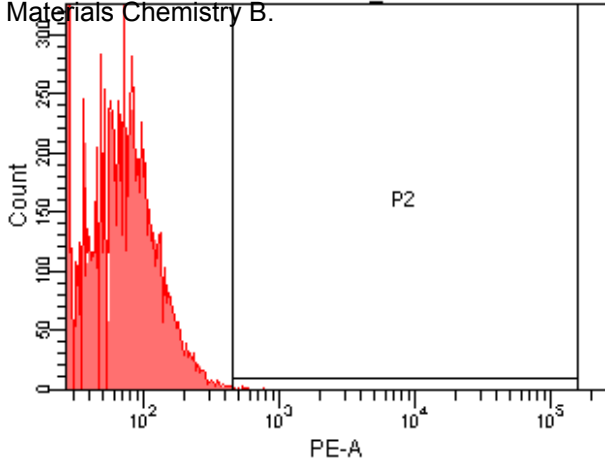

| Blank        |         |         |        |
|--------------|---------|---------|--------|
| Population   | #Events | %Parent | %Total |
| ■ All Events | 10,763  | ####    | 100.0  |
| ■ P1         | 10,000  | 92.9    | 92.9   |
| ⊗ P2         | 8       | 0.1     | 0.1    |

| Blank        |         |         |           |
|--------------|---------|---------|-----------|
| Population   | #Events | %Parent | PE-A Mean |
| ■ All Events | 10,763  | ####    | 70        |
| ■ P1         | 10,000  | 92.9    | 68        |
| ⊗ P2         | 8       | 0.1     | 548       |

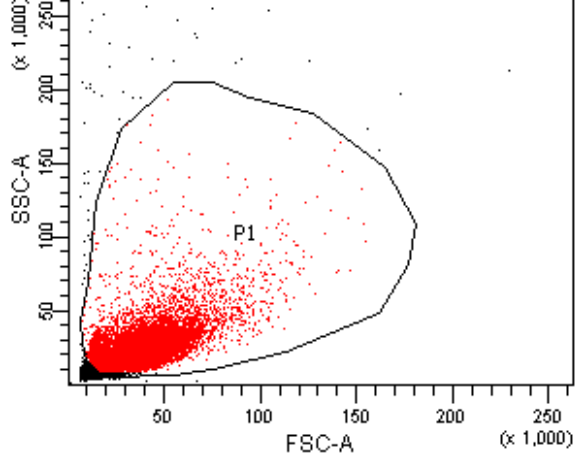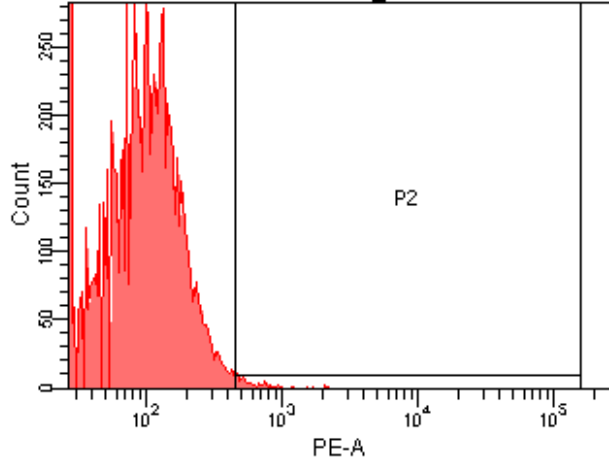

PS HSPs MHCI isotype

| Population | #Events | %Parent | %Total |
|------------|---------|---------|--------|
| All Events | 11,528  | ####    | 100.0  |
| P1         | 10,000  | 86.7    | 86.7   |
| P2         | 81      | 0.8     | 0.7    |

PS HSPs MHCI isotype

| Population | #Events | %Parent | PE-A Mean |
|------------|---------|---------|-----------|
| All Events | 11,528  | ####    | 104       |
| P1         | 10,000  | 86.7    | 108       |
| P2         | 81      | 0.8     | 688       |

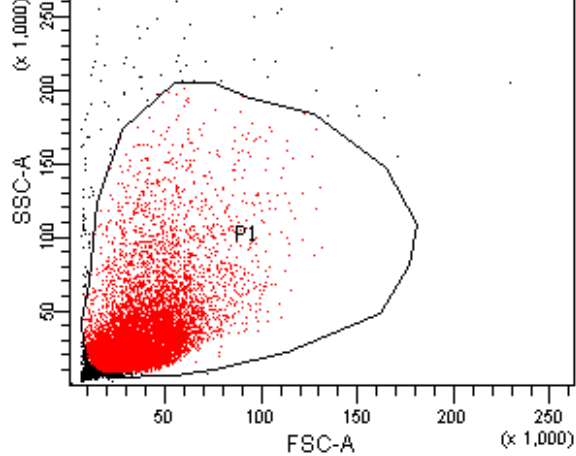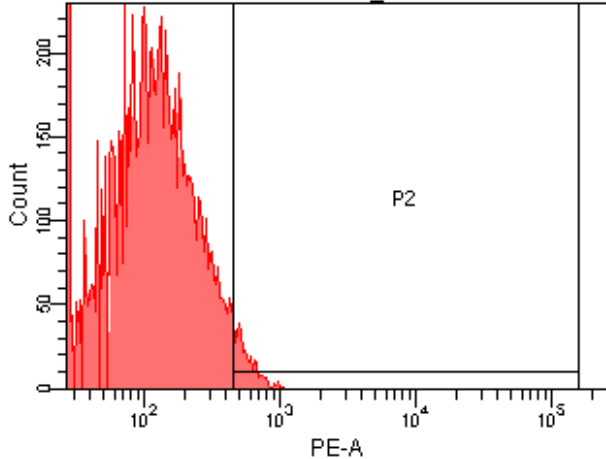

PS HSPs@glucan MHCI isotype

| Population | #Events | %Parent | %Total |
|------------|---------|---------|--------|
| All Events | 10,831  | ####    | 100.0  |
| P1         | 10,000  | 92.3    | 92.3   |
| P2         | 326     | 3.3     | 3.0    |

PS HSPs@glucan MHCI isotype

| Population | #Events | %Parent | PE-A Mean |
|------------|---------|---------|-----------|
| All Events | 10,831  | ####    | 148       |
| P1         | 10,000  | 92.3    | 143       |
| P2         | 326     | 3.3     | 568       |

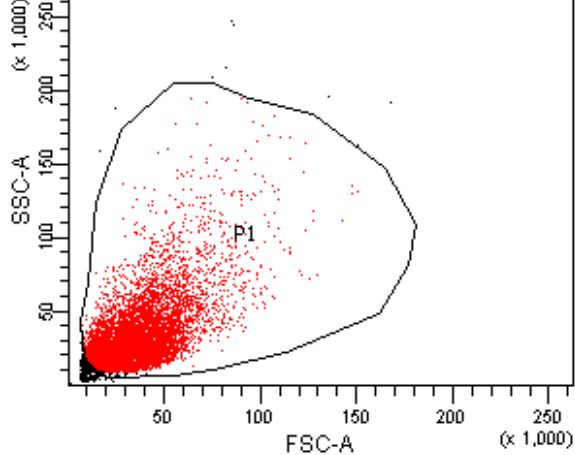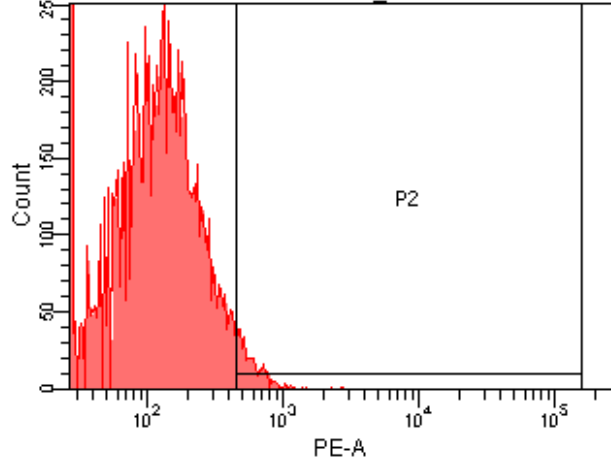

E. coli HSPs MHC1 isotype

| Population | #Events | %Parent | %Total |
|------------|---------|---------|--------|
| All Events | 10,543  | ####    | 100.0  |
| P1         | 10,000  | 94.8    | 94.8   |
| P2         | 344     | 3.4     | 3.3    |

E. coli HSPs MHC1 isotype

| Population | #Events | %Parent | PE-A Mean |
|------------|---------|---------|-----------|
| All Events | 10,543  | ####    | 144       |
| P1         | 10,000  | 94.8    | 148       |
| P2         | 344     | 3.4     | 601       |

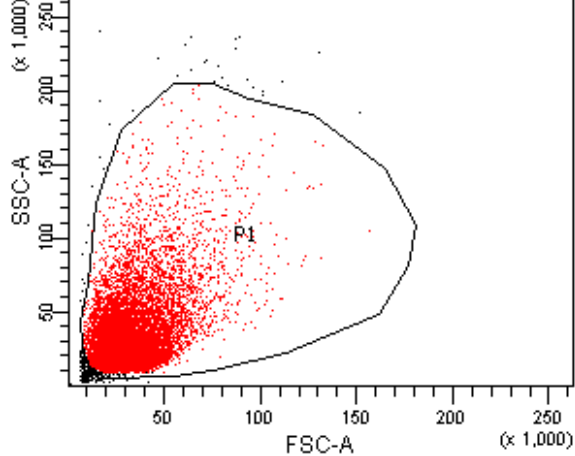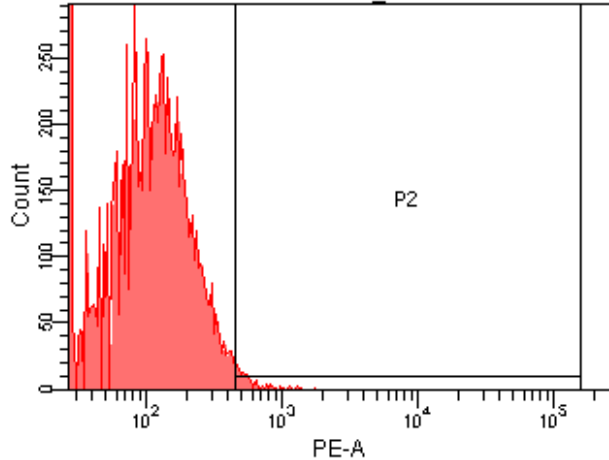

E. coli HSPs@glucan MHCI isotype

| Population   | #Events | %Parent | %Total |
|--------------|---------|---------|--------|
| ■ All Events | 10,405  | ####    | 100.0  |
| ■ P1         | 10,000  | 96.1    | 96.1   |
| ⊠ P2         | 127     | 1.3     | 1.2    |

E. coli HSPs@glucan MHCI isotype

| Population   | #Events | %Parent | PE-A Mean |
|--------------|---------|---------|-----------|
| ■ All Events | 10,405  | ####    | 136       |
| ■ P1         | 10,000  | 96.1    | 128       |
| ⊠ P2         | 127     | 1.3     | 604       |

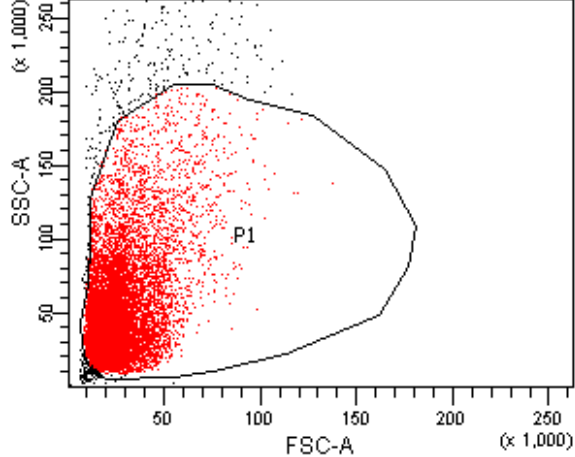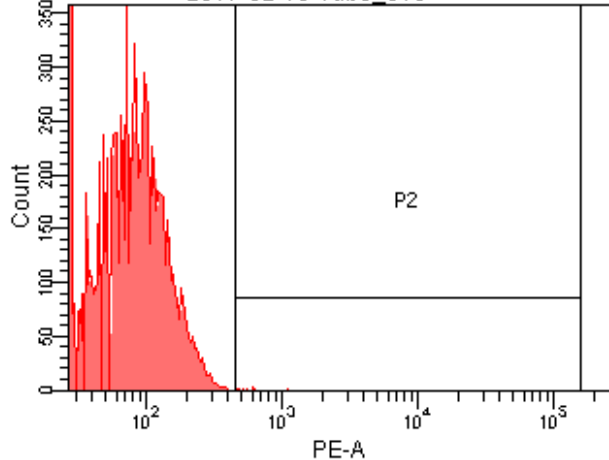

S. aureus HSPs MHCI isotype

| Population | #Events | %Parent | %Total |
|------------|---------|---------|--------|
| All Events | 10,535  | ####    | 100.0  |
| P1         | 10,053  | 95.4    | 95.4   |
| P2         | 8       | 0.1     | 0.1    |

S. aureus HSPs MHCI isotype

| Population | #Events | %Parent | PE-A Mean |
|------------|---------|---------|-----------|
| All Events | 10,535  | ####    | 87        |
| P1         | 10,053  | 95.4    | 82        |
| P2         | 8       | 0.1     | 595       |

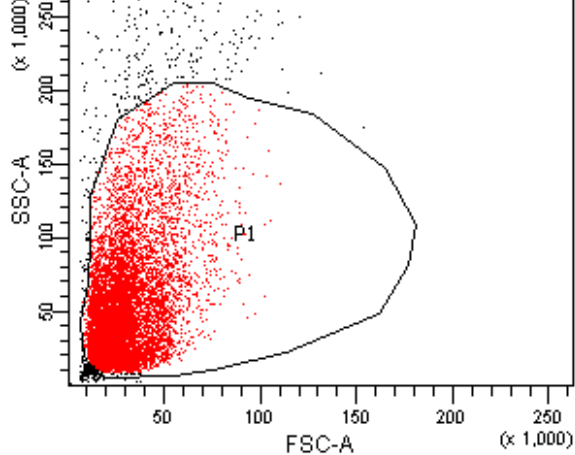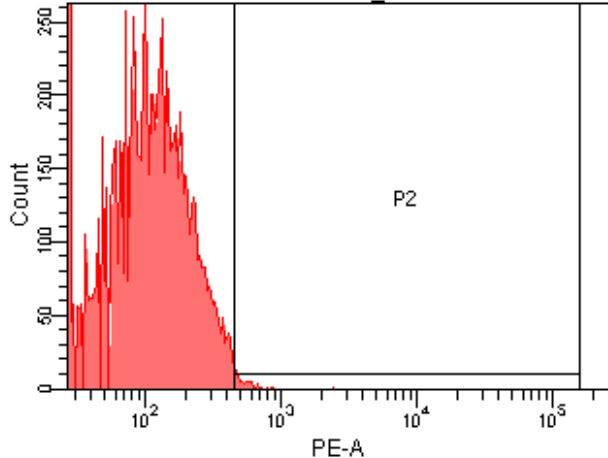

S. aureus HSPs@glucan MHCI isotype

| Population | #Events | %Parent | %Total |
|------------|---------|---------|--------|
| All Events | 10,608  | ####    | 100.0  |
| P1         | 10,000  | 94.3    | 94.3   |
| P2         | 62      | 0.6     | 0.6    |

S. aureus HSPs@glucan MHCI isotype

| Population | #Events | %Parent | PE-A Mean |
|------------|---------|---------|-----------|
| All Events | 10,608  | ####    | 140       |
| P1         | 10,000  | 94.3    | 123       |
| P2         | 62      | 0.6     | 556       |

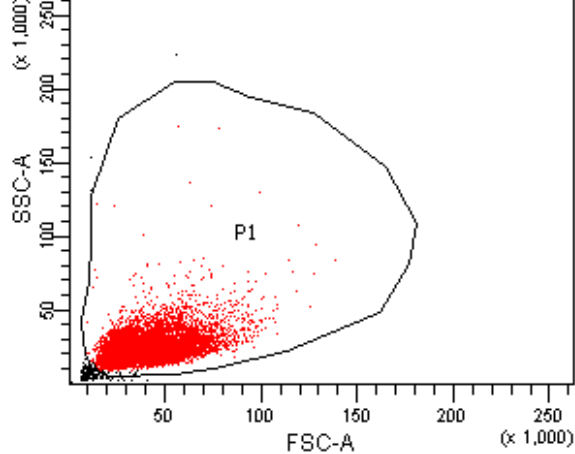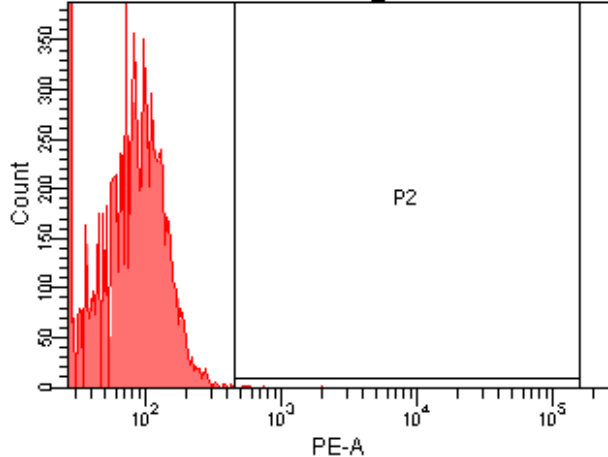

PBS MHC I isotype

| Population | #Events | %Parent | %Total |
|------------|---------|---------|--------|
| All Events | 10,234  | ####    | 100.0  |
| P1         | 10,000  | 97.7    | 97.7   |
| P2         | 6       | 0.1     | 0.1    |

PBS MHC I isotype

| Population | #Events | %Parent | PE-A Mean |
|------------|---------|---------|-----------|
| All Events | 10,234  | ####    | 83        |
| P1         | 10,000  | 97.7    | 85        |
| P2         | 6       | 0.1     | 817       |



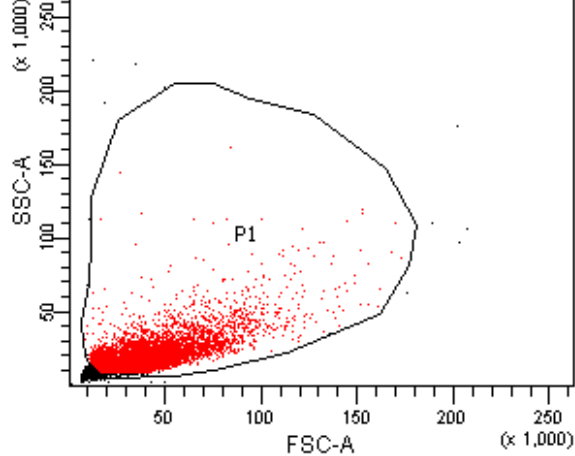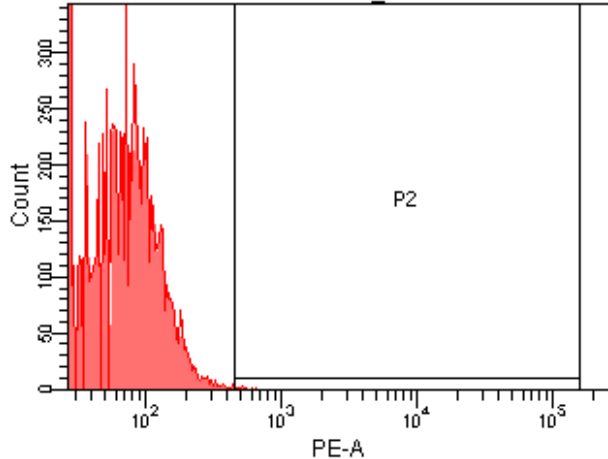

| LPS MHCI isotype |         |         |        |
|------------------|---------|---------|--------|
| Population       | #Events | %Parent | %Total |
| ■ All Events     | 10,913  | ####    | 100.0  |
| ■ P1             | 10,000  | 91.6    | 91.6   |
| ⊠ P2             | 9       | 0.1     | 0.1    |

| LPS MHCI isotype |         |         |           |
|------------------|---------|---------|-----------|
| Population       | #Events | %Parent | PE-A Mean |
| ■ All Events     | 10,913  | ####    | 65        |
| ■ P1             | 10,000  | 91.6    | 67        |
| ⊠ P2             | 9       | 0.1     | 523       |

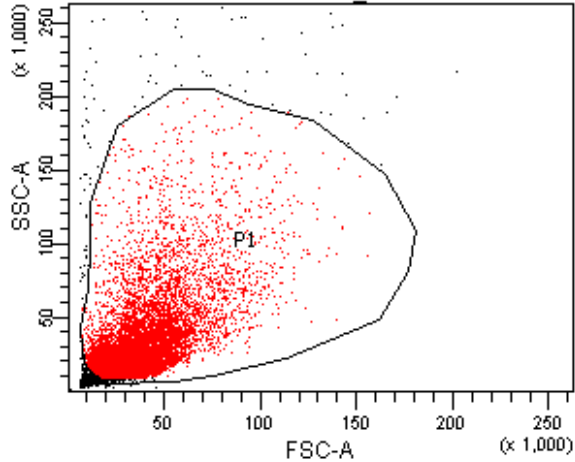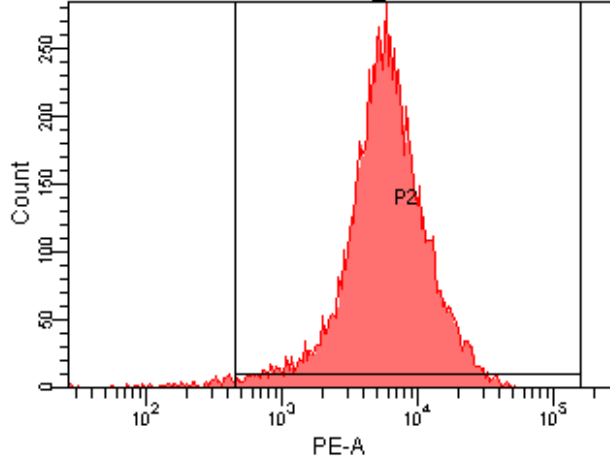

### PS HSPs MHCI

| Population | #Events | %Parent | %Total |
|------------|---------|---------|--------|
| All Events | 10,723  | ####    | 100.0  |
| P1         | 10,000  | 93.3    | 93.3   |
| P2         | 9,893   | 98.9    | 92.3   |

### PS HSPs MHCI

| Population | #Events | %Parent | PE-A Mean |
|------------|---------|---------|-----------|
| All Events | 10,723  | ####    | 6,997     |
| P1         | 10,000  | 93.3    | 7,217     |
| P2         | 9,893   | 98.9    | 7,292     |

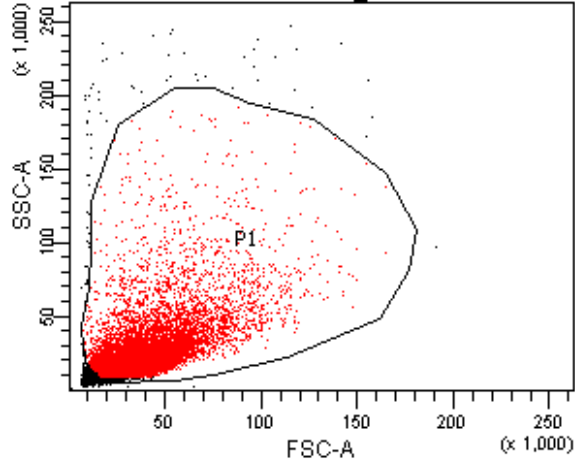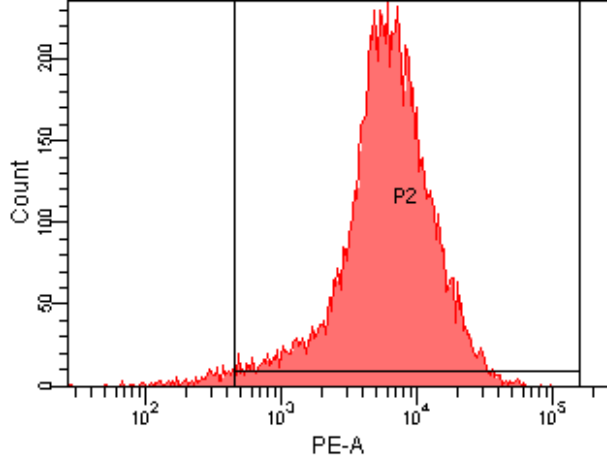

PS HSPs@glucan MHC I

| Population | #Events | %Parent | %Total |
|------------|---------|---------|--------|
| All Events | 11,183  | ####    | 100.0  |
| P1         | 10,000  | 89.4    | 89.4   |
| P2         | 9,823   | 98.2    | 87.8   |

PS HSPs@glucan MHC I

| Population | #Events | %Parent | PE-A Mean |
|------------|---------|---------|-----------|
| All Events | 11,183  | ####    | 7,082     |
| P1         | 10,000  | 89.4    | 7,685     |
| P2         | 9,823   | 98.2    | 7,818     |

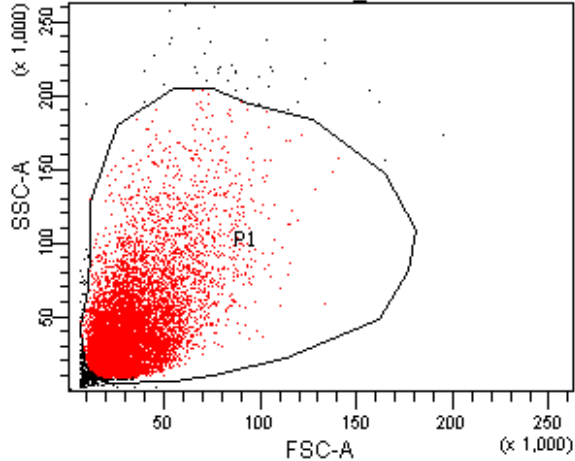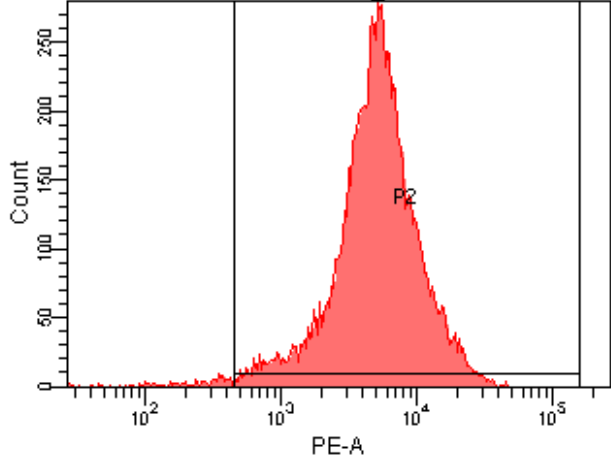

E. coli HSPs MHC1

| Population   | #Events | %Parent | %Total |
|--------------|---------|---------|--------|
| ■ All Events | 10,487  | ####    | 100.0  |
| ■ P1         | 10,000  | 95.4    | 95.4   |
| ⊠ P2         | 9,873   | 98.7    | 94.1   |

E. coli HSPs MHC1

| Population   | #Events | %Parent | PE-A Mean |
|--------------|---------|---------|-----------|
| ■ All Events | 10,487  | ####    | 6,222     |
| ■ P1         | 10,000  | 95.4    | 6,271     |
| ⊠ P2         | 9,873   | 98.7    | 6,348     |

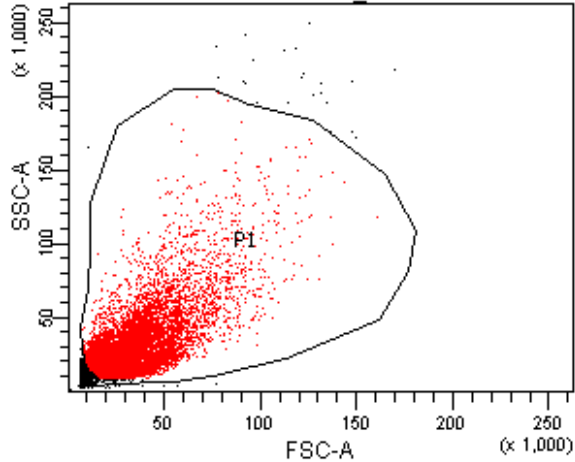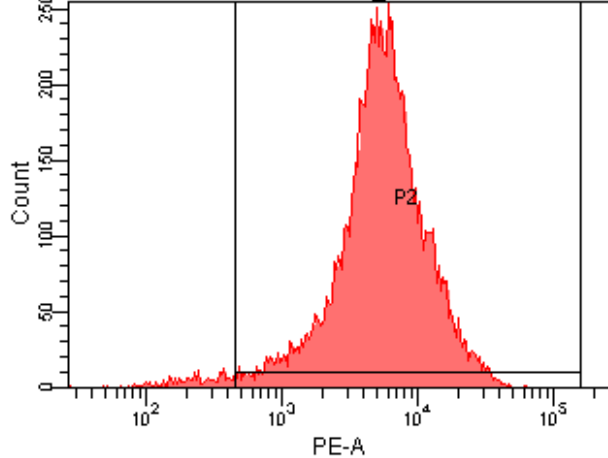

E. coli HSPs@glucan MHC I

| Population | #Events | %Parent | %Total |
|------------|---------|---------|--------|
| All Events | 10,715  | ####    | 100.0  |
| P1         | 10,000  | 93.3    | 93.3   |
| P2         | 9,797   | 98.0    | 91.4   |

E. coli HSPs@glucan MHC I

| Population | #Events | %Parent | PE-A Mean |
|------------|---------|---------|-----------|
| All Events | 10,715  | ####    | 6,649     |
| P1         | 10,000  | 93.3    | 6,894     |
| P2         | 9,797   | 98.0    | 7,032     |

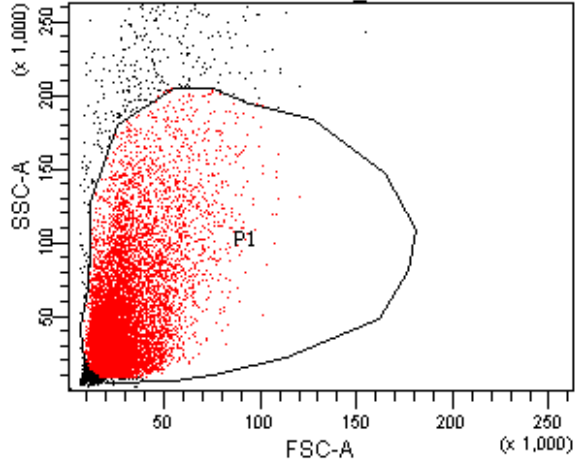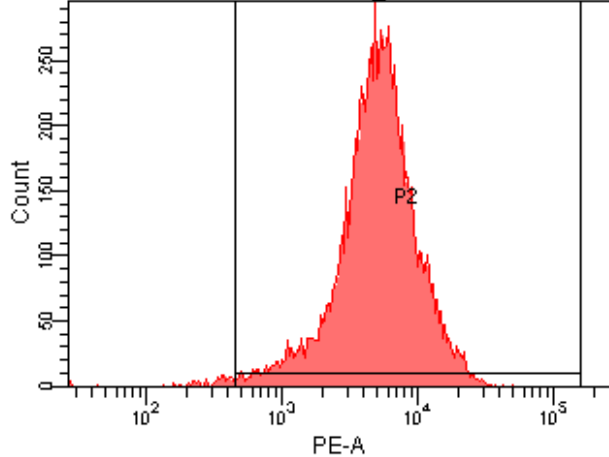

S. aureus HSPs MHC I

| Population | #Events | %Parent | %Total |
|------------|---------|---------|--------|
| All Events | 10,759  | ####    | 100.0  |
| P1         | 10,000  | 92.9    | 92.9   |
| P2         | 9,913   | 99.1    | 92.1   |

S. aureus HSPs MHC I

| Population | #Events | %Parent | PE-A Mean |
|------------|---------|---------|-----------|
| All Events | 10,759  | ####    | 6,304     |
| P1         | 10,000  | 92.9    | 6,068     |
| P2         | 9,913   | 99.1    | 6,118     |

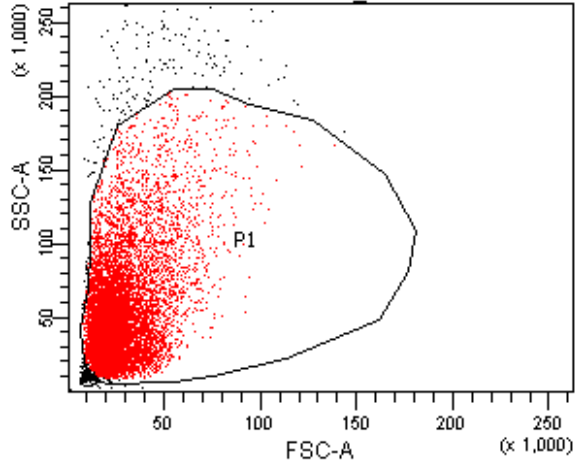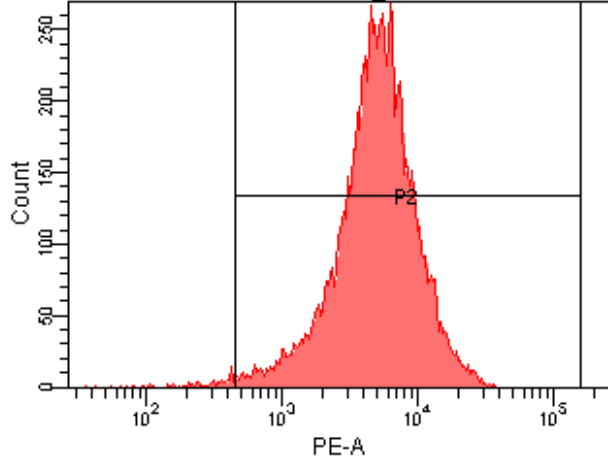

S. aureus HSPs@glucan MHC1

| Population   | #Events | %Parent | %Total |
|--------------|---------|---------|--------|
| ■ All Events | 10,450  | ####    | 100.0  |
| ■ P1         | 10,000  | 95.7    | 95.7   |
| ⊠ P2         | 9,907   | 99.1    | 94.8   |

S. aureus HSPs@glucan MHC1

| Population   | #Events | %Parent | PE-A Mean |
|--------------|---------|---------|-----------|
| ■ All Events | 10,450  | ####    | 6,138     |
| ■ P1         | 10,000  | 95.7    | 5,962     |
| ⊠ P2         | 9,907   | 99.1    | 6,016     |

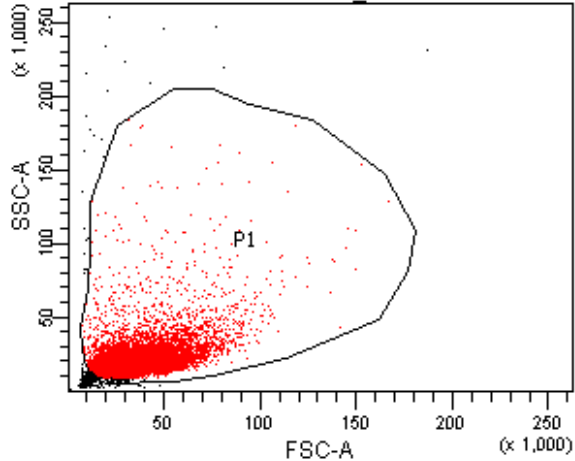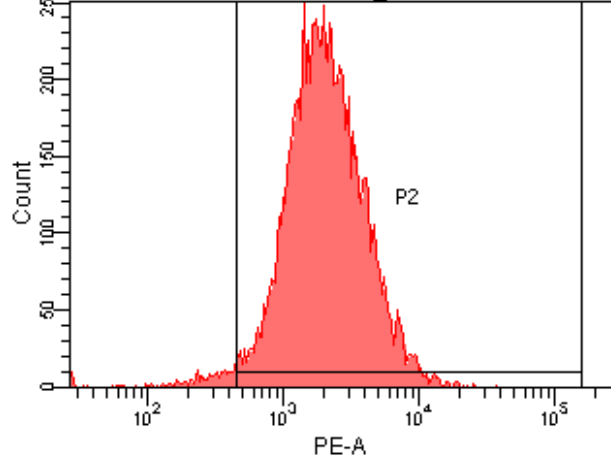

PBS MHCI

| Population | #Events | %Parent | %Total |
|------------|---------|---------|--------|
| All Events | 10,840  | ####    | 100.0  |
| P1         | 10,000  | 92.3    | 92.3   |
| P2         | 9,779   | 97.8    | 90.2   |

PBS MHCI

| Population | #Events | %Parent | PE-A Mean |
|------------|---------|---------|-----------|
| All Events | 10,840  | ####    | 2,362     |
| P1         | 10,000  | 92.3    | 2,506     |
| P2         | 9,779   | 97.8    | 2,557     |



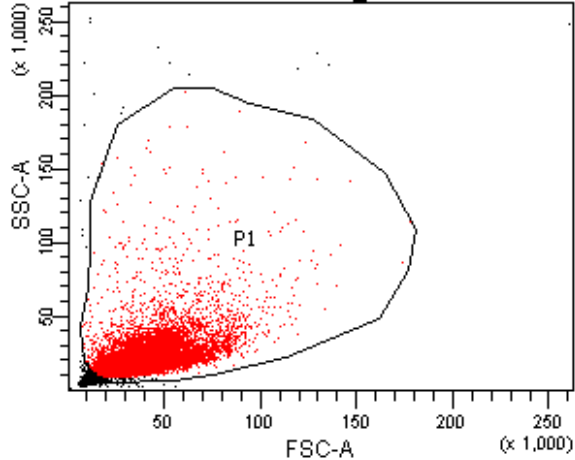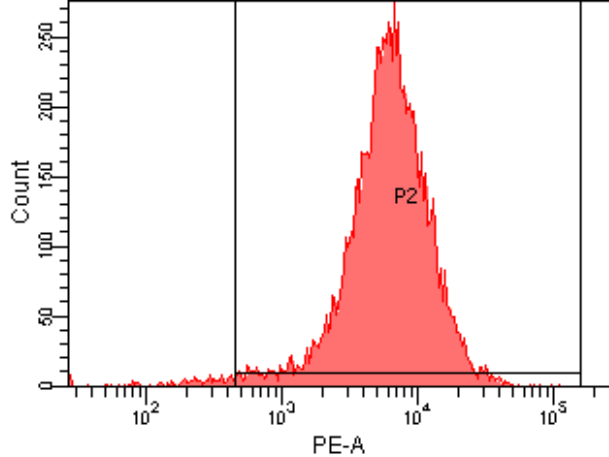

### LPS MHCI

| Population | #Events | %Parent | %Total |
|------------|---------|---------|--------|
| All Events | 10,581  | ####    | 100.0  |
| P1         | 10,000  | 94.5    | 94.5   |
| P2         | 9,870   | 98.7    | 93.3   |

### LPS MHCI

| Population | #Events | %Parent | PE-A Mean |
|------------|---------|---------|-----------|
| All Events | 10,581  | ####    | 7,100     |
| P1         | 10,000  | 94.5    | 7,403     |
| P2         | 9,870   | 98.7    | 7,498     |
