# Supplementary material for: Antigen uptake and immunoadjuvant activity of pathogen-mimetic hollow silica particles conjugated with β-glucan
Source: Royal Society of Chemistry journal article supplement (doi:10.1039/c8tb02129e), 2018-01-01
Supplement: c8tb02129e2.pdf [file c8tb02129e2.pdf]

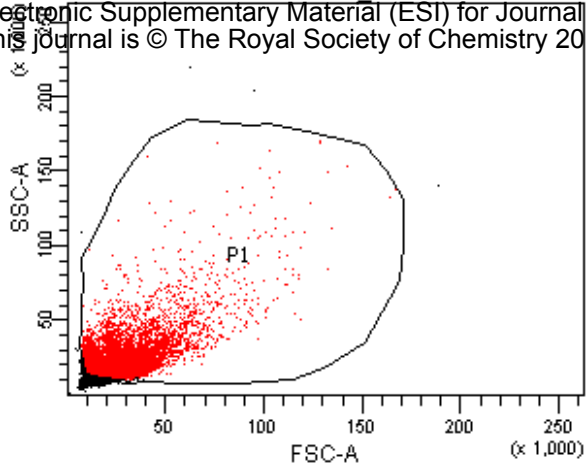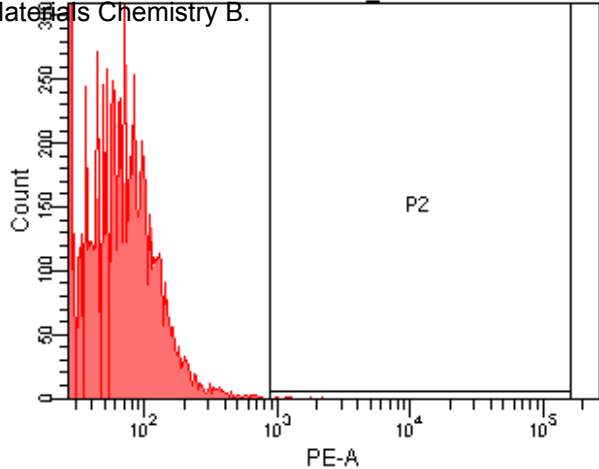

| Blank                                                                                                                |         |         |        |
|----------------------------------------------------------------------------------------------------------------------|---------|---------|--------|
| Population                                                                                                           | #Events | %Parent | %Total |
| <span style="display:inline-block; width:10px; height:10px; background-color:black;"></span> All Events              | 13,234  | ####    | 100.0  |
| <span style="display:inline-block; width:10px; height:10px; background-color:red;"></span> P1                        | 10,000  | 75.6    | 75.6   |
| <span style="display:inline-block; width:10px; height:10px; border:1px solid black; border-style:dashed;"></span> P2 | 7       | 0.1     | 0.1    |

| Blank                                                                                                                |         |         |           |
|----------------------------------------------------------------------------------------------------------------------|---------|---------|-----------|
| Population                                                                                                           | #Events | %Parent | PE-A Mean |
| <span style="display:inline-block; width:10px; height:10px; background-color:black;"></span> All Events              | 13,234  | ####    | 57        |
| <span style="display:inline-block; width:10px; height:10px; background-color:red;"></span> P1                        | 10,000  | 75.6    | 63        |
| <span style="display:inline-block; width:10px; height:10px; border:1px solid black; border-style:dashed;"></span> P2 | 7       | 0.1     | 1,397     |

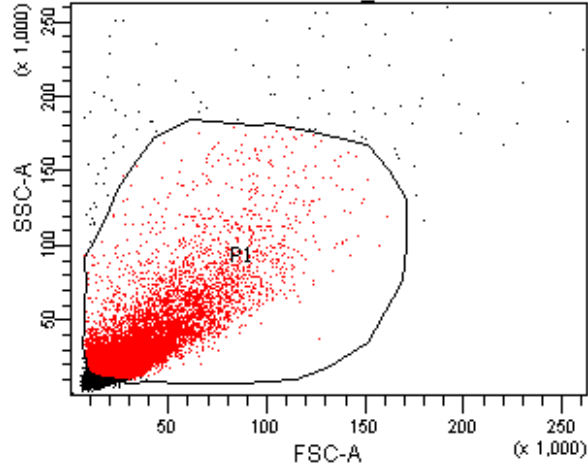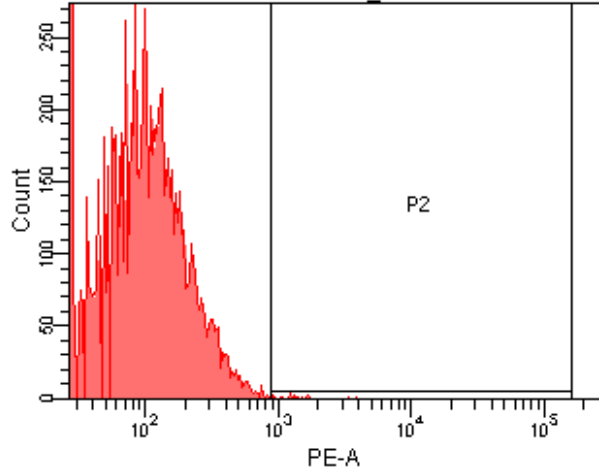

PS HSPs MHCII isotype

| Population | #Events | %Parent | %Total |
|------------|---------|---------|--------|
| All Events | 12,749  | ####    | 100.0  |
| P1         | 10,000  | 78.4    | 78.4   |
| P2         | 22      | 0.2     | 0.2    |

PS HSPs MHCII isotype

| Population | #Events | %Parent | PE-A Mean |
|------------|---------|---------|-----------|
| All Events | 12,749  | ####    | 109       |
| P1         | 10,000  | 78.4    | 116       |
| P2         | 22      | 0.2     | 1,436     |

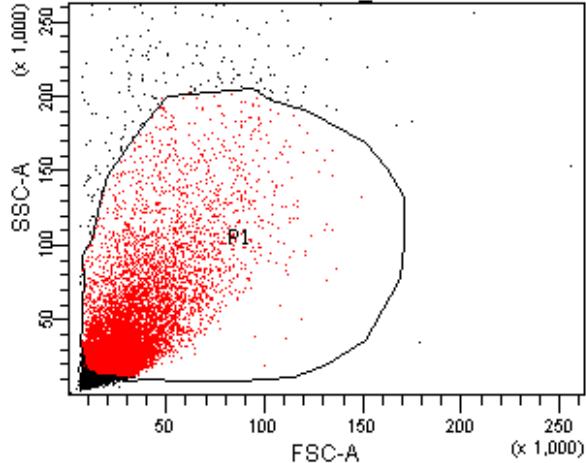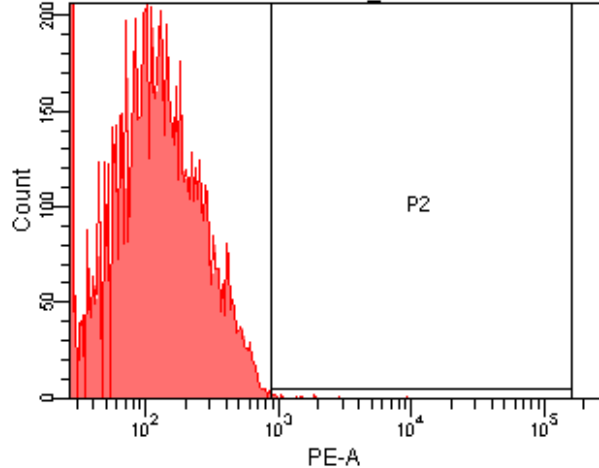

PS HSPs@glucan MHCII isotype

| Population | #Events | %Parent | %Total |
|------------|---------|---------|--------|
| All Events | 12,116  | ####    | 100.0  |
| P1         | 9,677   | 79.9    | 79.9   |
| P2         | 18      | 0.2     | 0.1    |

PS HSPs@glucan MHCII isotype

| Population | #Events | %Parent | PE-A Mean |
|------------|---------|---------|-----------|
| All Events | 12,116  | ####    | 148       |
| P1         | 9,677   | 79.9    | 151       |
| P2         | 18      | 0.2     | 1,695     |

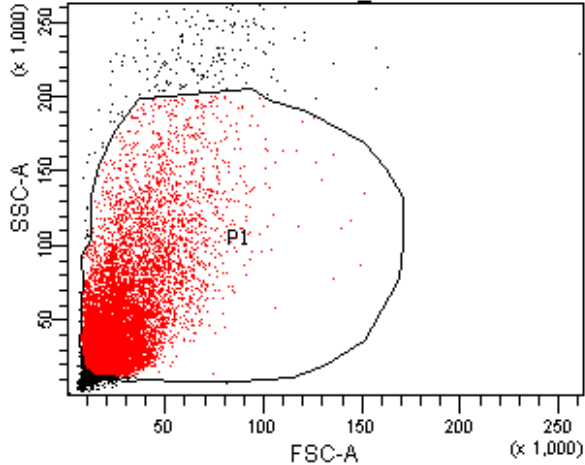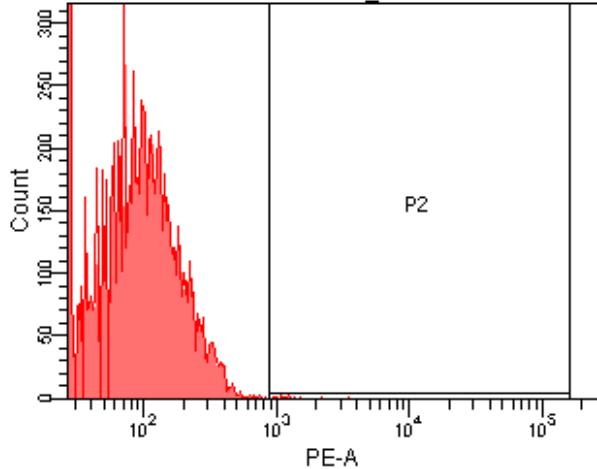

E. coli HSPs MHCII isotype

| Population | #Events | %Parent | %Total |
|------------|---------|---------|--------|
| All Events | 11,557  | ####    | 100.0  |
| P1         | 10,011  | 86.6    | 86.6   |
| P2         | 14      | 0.1     | 0.1    |

E. coli HSPs MHCII isotype

| Population | #Events | %Parent | PE-A Mean |
|------------|---------|---------|-----------|
| All Events | 11,557  | ####    | 110       |
| P1         | 10,011  | 86.6    | 104       |
| P2         | 14      | 0.1     | 1,424     |

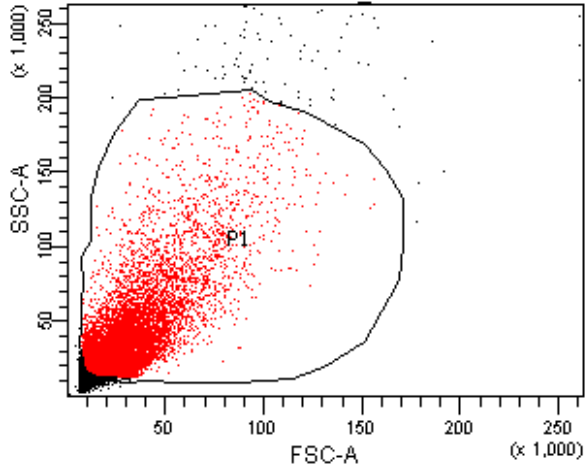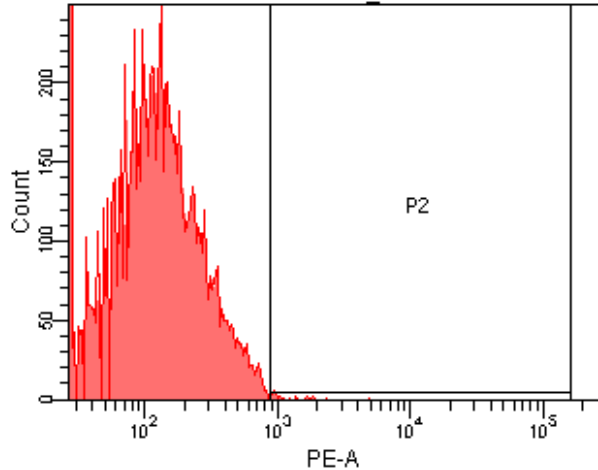

E. coli HSPs@glucan MHCII isotype

| Population | #Events | %Parent | %Total |
|------------|---------|---------|--------|
| All Events | 11,768  | ####    | 100.0  |
| P1         | 10,000  | 85.0    | 85.0   |
| P2         | 26      | 0.3     | 0.2    |

E. coli HSPs@glucan MHCII isotype

| Population | #Events | %Parent | PE-A Mean |
|------------|---------|---------|-----------|
| All Events | 11,768  | ####    | 149       |
| P1         | 10,000  | 85.0    | 154       |
| P2         | 26      | 0.3     | 1,399     |

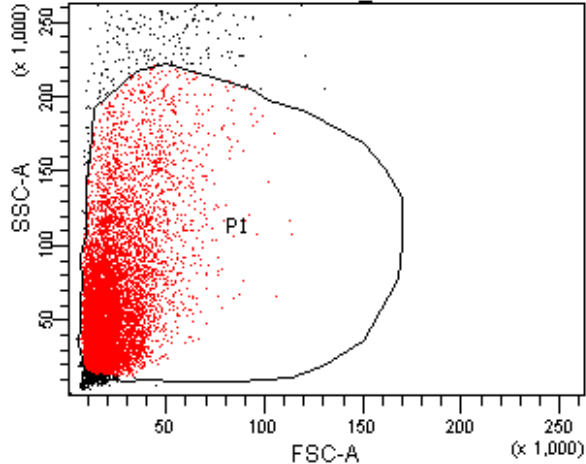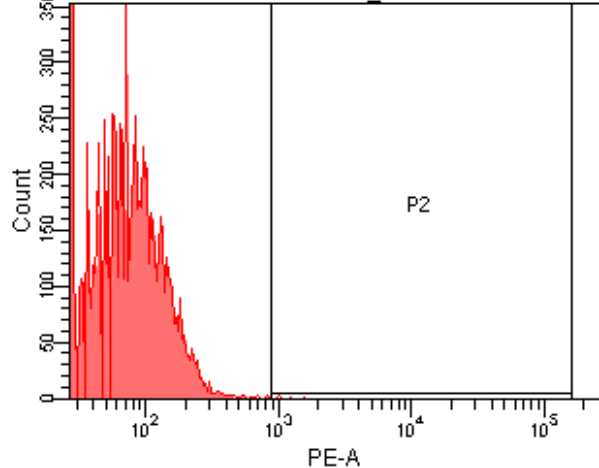

S. aureus HSPs MHCII isotype

| Population | #Events | %Parent | %Total |
|------------|---------|---------|--------|
| All Events | 11,003  | ####    | 100.0  |
| P1         | 10,000  | 90.9    | 90.9   |
| P2         | 5       | 0.0     | 0.0    |

S. aureus HSPs MHCII isotype

| Population | #Events | %Parent | PE-A Mean |
|------------|---------|---------|-----------|
| All Events | 11,003  | ####    | 83        |
| P1         | 10,000  | 90.9    | 74        |
| P2         | 5       | 0.0     | 1,143     |

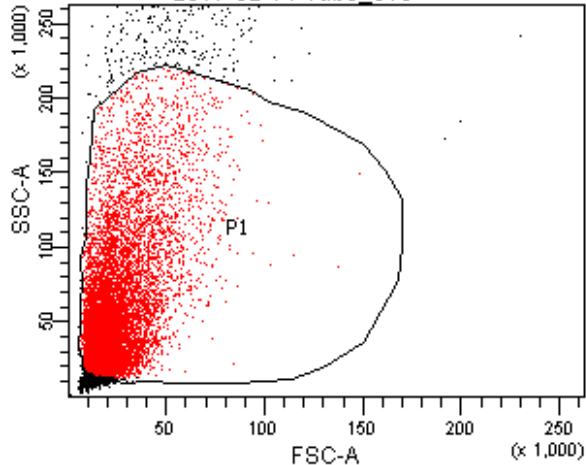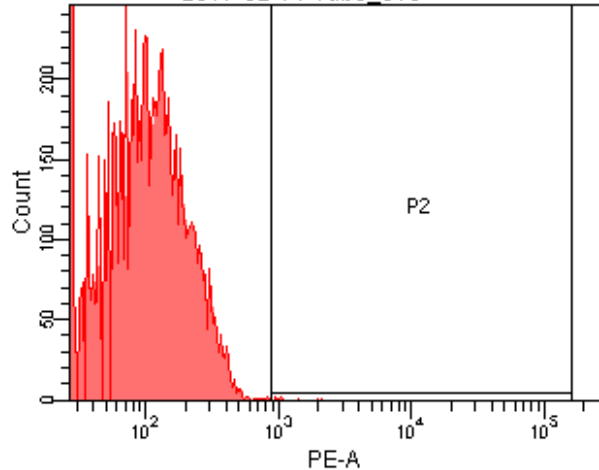

S. aureus HSPs@glucan MHCII isotype

| Population | #Events | %Parent | %Total |
|------------|---------|---------|--------|
| All Events | 11,431  | ####    | 100.0  |
| P1         | 10,000  | 87.5    | 87.5   |
| P2         | 9       | 0.1     | 0.1    |

S. aureus HSPs@glucan MHCI isotype

| Population | #Events | %Parent | PE-A Mean |
|------------|---------|---------|-----------|
| All Events | 11,431  | ####    | 156       |
| P1         | 10,000  | 87.5    | 115       |
| P2         | 9       | 0.1     | 1,256     |

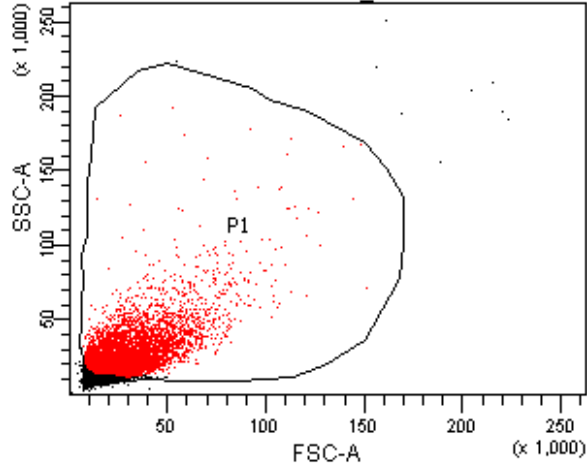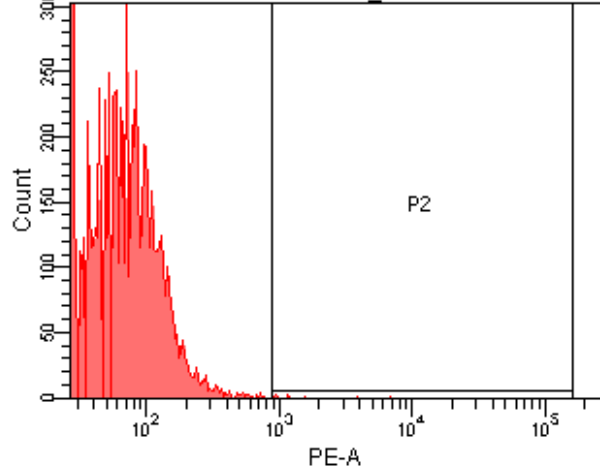

| PBS MHCII isotype |         |         |        |
|-------------------|---------|---------|--------|
| Population        | #Events | %Parent | %Total |
| All Events        | 20,970  | ####    | 100.0  |
| P1                | 10,000  | 47.7    | 47.7   |
| P2                | 9       | 0.1     | 0.0    |

| PBS MHCII isotype |         |         |           |
|-------------------|---------|---------|-----------|
| Population        | #Events | %Parent | PE-A Mean |
| All Events        | 20,970  | ####    | 47        |
| P1                | 10,000  | 47.7    | 64        |
| P2                | 9       | 0.1     | 2,032     |



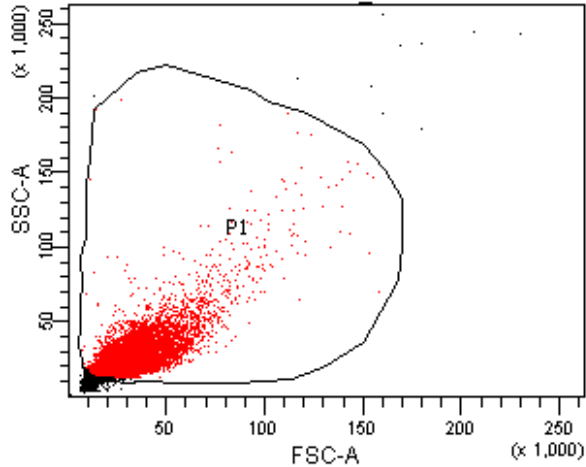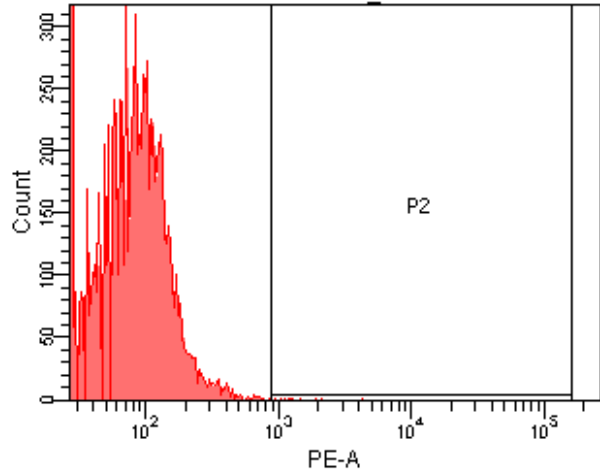

| Population | LPS MHCII isotype |         |        |
|------------|-------------------|---------|--------|
|            | #Events           | %Parent | %Total |
| All Events | 10,784            | ###     | 100.0  |
| P1         | 10,000            | 92.7    | 92.7   |
| P2         | 10                | 0.1     | 0.1    |

| Population | LPS MHCII isotype |         |  | PE-A  |
|------------|-------------------|---------|--|-------|
|            | #Events           | %Parent |  | Mean  |
| All Events | 10,784            | ###     |  | 85    |
| P1         | 10,000            | 92.7    |  | 86    |
| P2         | 10                | 0.1     |  | 1,659 |

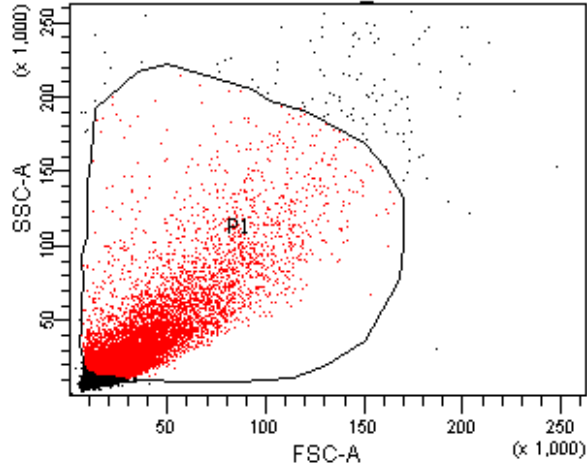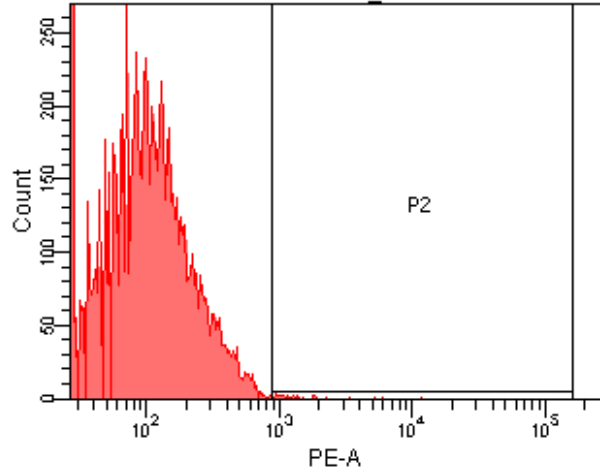

| PS HSPs MHCII |         |         |        |
|---------------|---------|---------|--------|
| Population    | #Events | %Parent | %Total |
| All Events    | 13,557  | ####    | 100.0  |
| P1            | 10,000  | 73.8    | 73.8   |
| P2            | 30      | 0.3     | 0.2    |

| PS HSPs MHCII |         |         | PE-A  |
|---------------|---------|---------|-------|
| Population    | #Events | %Parent | Mean  |
| All Events    | 13,557  | ####    | 116   |
| P1            | 10,000  | 73.8    | 124   |
| P2            | 30      | 0.3     | 1,972 |

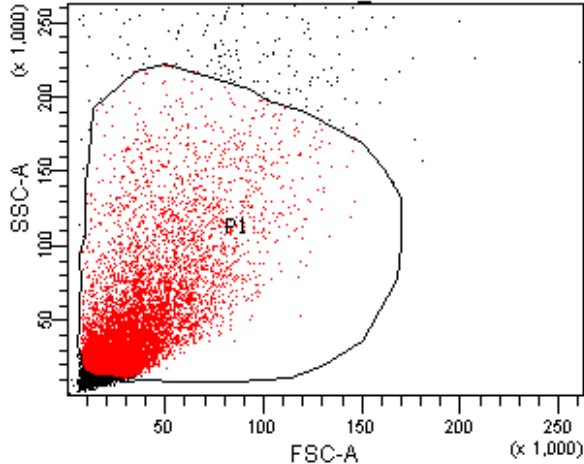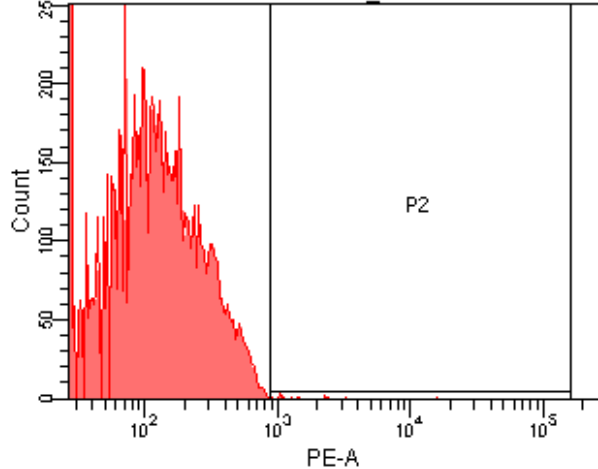

PS HSPs@glucan MHCII

| Population   | #Events | %Parent | %Total |
|--------------|---------|---------|--------|
| ■ All Events | 12,684  | ####    | 100.0  |
| ■ P1         | 10,000  | 78.8    | 78.8   |
| ⊠ P2         | 17      | 0.2     | 0.1    |

PS HSPs@glucan MHCII

| Population   | #Events | %Parent | PE-A Mean |
|--------------|---------|---------|-----------|
| ■ All Events | 12,684  | ####    | 151       |
| ■ P1         | 10,000  | 78.8    | 151       |
| ⊠ P2         | 17      | 0.2     | 2,397     |

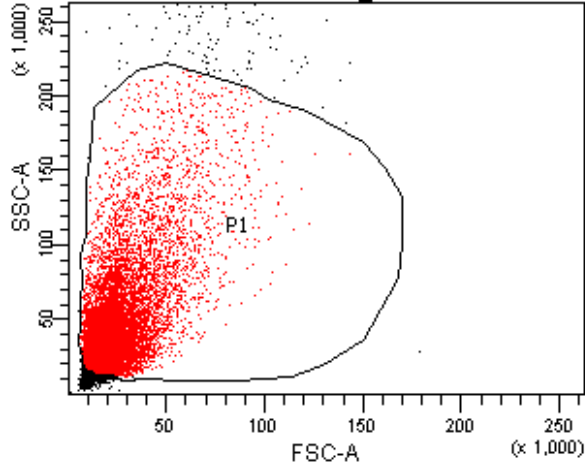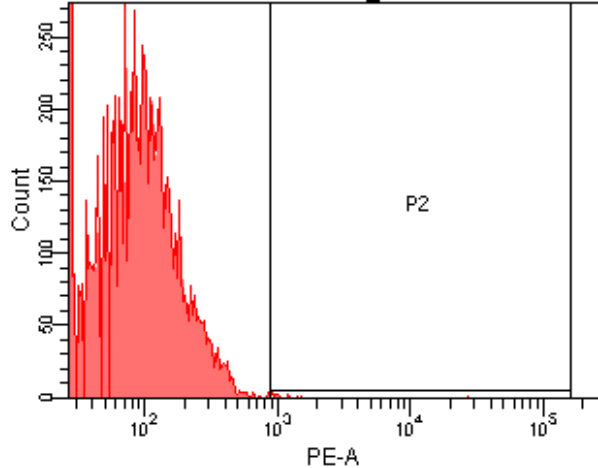

### E. coli HSPs MHCII

| Population | #Events | %Parent | %Total |
|------------|---------|---------|--------|
| All Events | 11,614  | ####    | 100.0  |
| P1         | 10,000  | 86.1    | 86.1   |
| P2         | 15      | 0.2     | 0.1    |

### E. coli HSPs MHCII

| Population | #Events | %Parent | PE-A Mean |
|------------|---------|---------|-----------|
| All Events | 11,614  | ####    | 111       |
| P1         | 10,000  | 86.1    | 102       |
| P2         | 15      | 0.2     | 2,806     |

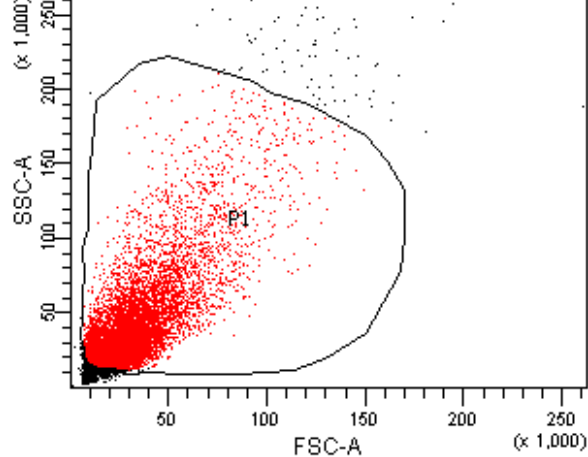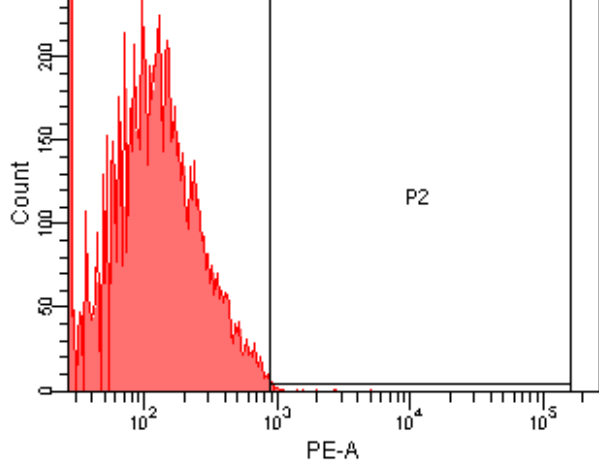

E. coli HSPs@glucan MHCII

| Population   | #Events | %Parent | %Total |
|--------------|---------|---------|--------|
| ■ All Events | 12,041  | ####    | 100.0  |
| ■ P1         | 10,000  | 83.0    | 83.0   |
| ⊠ P2         | 21      | 0.2     | 0.2    |

E. coli HSPs@glucan MHCII

| Population   | #Events | %Parent | PE-A Mean |
|--------------|---------|---------|-----------|
| ■ All Events | 12,041  | ####    | 146       |
| ■ P1         | 10,000  | 83.0    | 153       |
| ⊠ P2         | 21      | 0.2     | 1,326     |

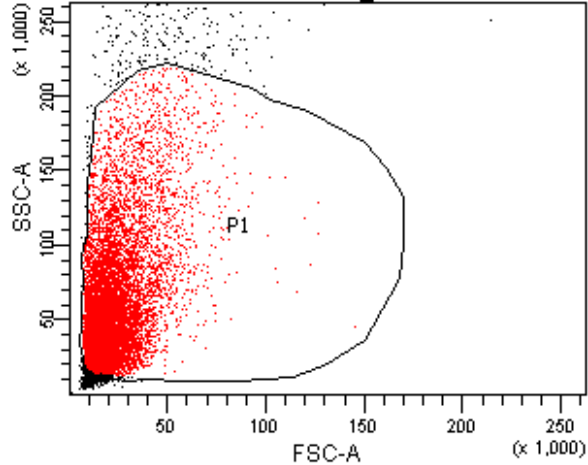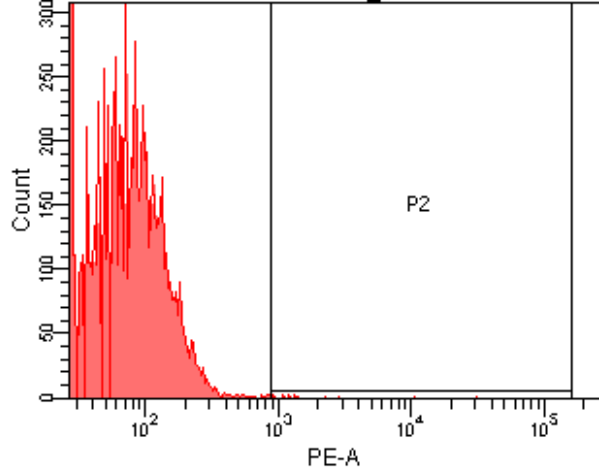

S. aureus HSPs MHCII

| Population | #Events | %Parent | %Total |
|------------|---------|---------|--------|
| All Events | 11,251  | ####    | 100.0  |
| P1         | 10,000  | 88.9    | 88.9   |
| P2         | 13      | 0.1     | 0.1    |

S. aureus HSPs MHCII

| Population | #Events | %Parent | PE-A Mean |
|------------|---------|---------|-----------|
| All Events | 11,251  | ####    | 93        |
| P1         | 10,000  | 88.9    | 79        |
| P2         | 13      | 0.1     | 4,446     |

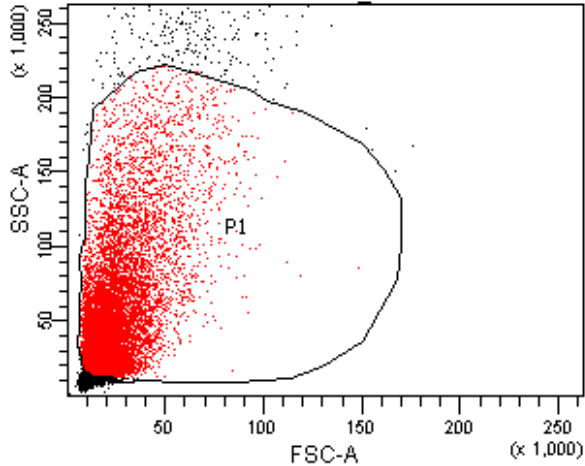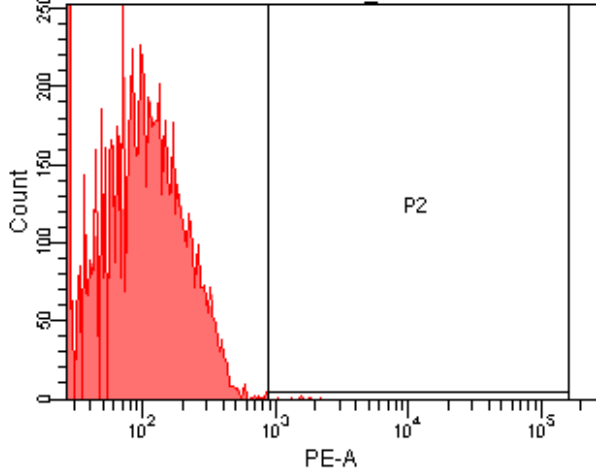

S. aureus HSPs@glucan MHCII

| Population | #Events | %Parent | %Total |
|------------|---------|---------|--------|
| All Events | 11,629  | ####    | 100.0  |
| P1         | 10,000  | 86.0    | 86.0   |
| P2         | 9       | 0.1     | 0.1    |

S. aureus HSPs@glucan MHCII

| Population | #Events | %Parent | PE-A Mean |
|------------|---------|---------|-----------|
| All Events | 11,629  | ####    | 144       |
| P1         | 10,000  | 86.0    | 116       |
| P2         | 9       | 0.1     | 1,531     |

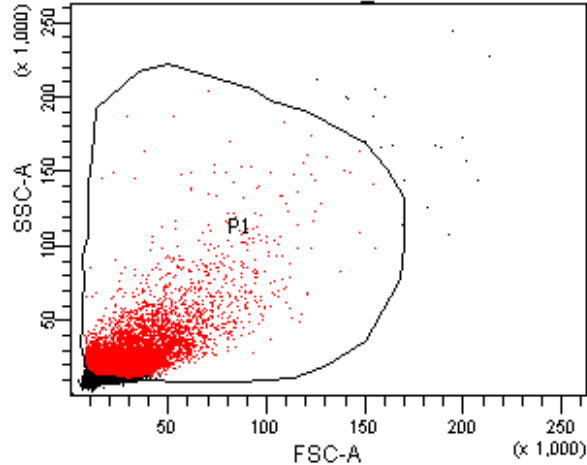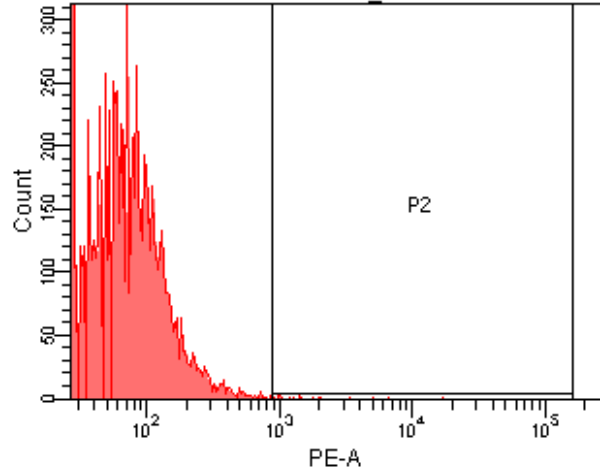

| PBS MHCII    |         |         |        |
|--------------|---------|---------|--------|
| Population   | #Events | %Parent | %Total |
| ■ All Events | 15,611  | ####    | 100.0  |
| ■ P1         | 10,000  | 64.1    | 64.1   |
| ☒ P2         | 16      | 0.2     | 0.1    |

| PBS MHCII    |         |         |           |
|--------------|---------|---------|-----------|
| Population   | #Events | %Parent | PE-A Mean |
| ■ All Events | 15,611  | ####    | 61        |
| ■ P1         | 10,000  | 64.1    | 74        |
| ☒ P2         | 16      | 0.2     | 3,003     |



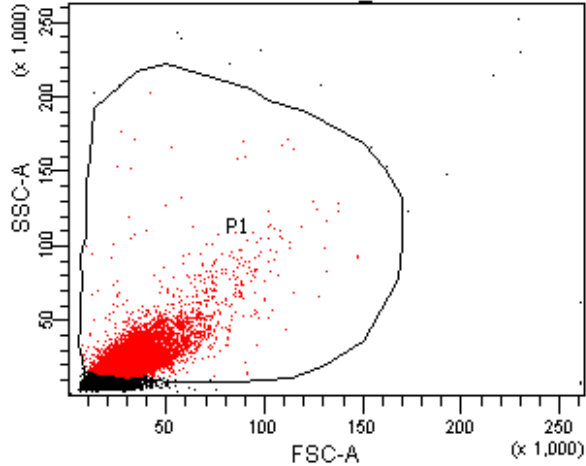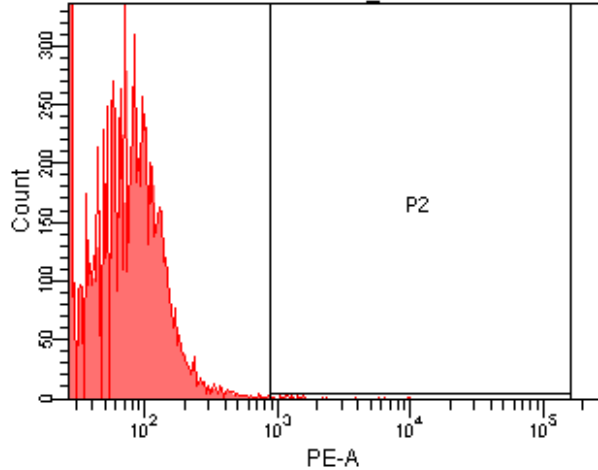

| LPS MHCII  |         |         |        |
|------------|---------|---------|--------|
| Population | #Events | %Parent | %Total |
| All Events | 13,945  | ####    | 100.0  |
| P1         | 10,000  | 71.7    | 71.7   |
| P2         | 27      | 0.3     | 0.2    |

| LPS MHCII  |         |         |           |
|------------|---------|---------|-----------|
| Population | #Events | %Parent | PE-A Mean |
| All Events | 13,945  | ####    | 76        |
| P1         | 10,000  | 71.7    | 82        |
| P2         | 27      | 0.3     | 2,400     |

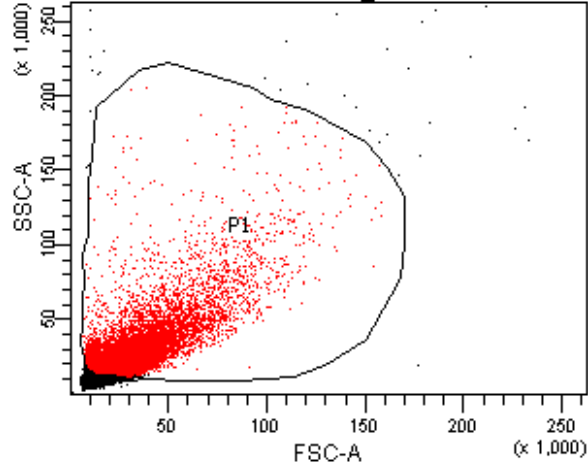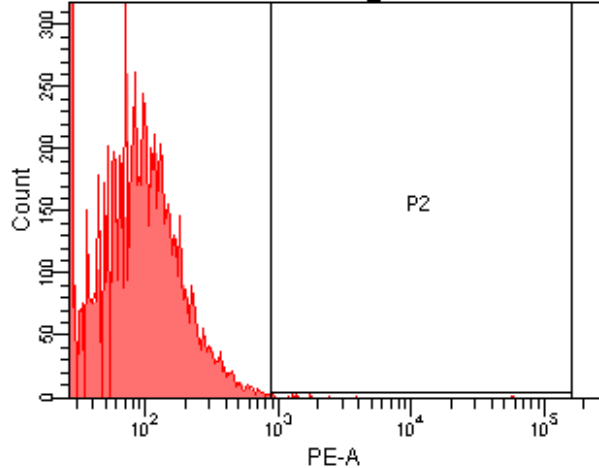

PS HSPs CD40 isotype

| Population | #Events | %Parent | %Total |
|------------|---------|---------|--------|
| All Events | 13,696  | ####    | 100.0  |
| P1         | 10,000  | 73.0    | 73.0   |
| P2         | 18      | 0.2     | 0.1    |

PS HSPs CD40 isotype

| Population | #Events | %Parent | PE-A Mean |
|------------|---------|---------|-----------|
| All Events | 13,696  | ####    | 97        |
| P1         | 10,000  | 73.0    | 113       |
| P2         | 18      | 0.2     | 4,639     |

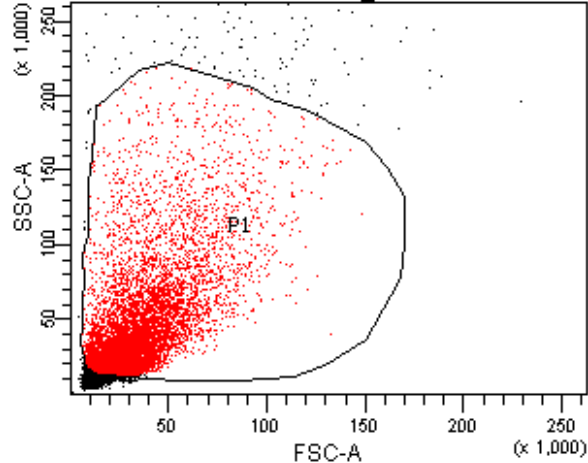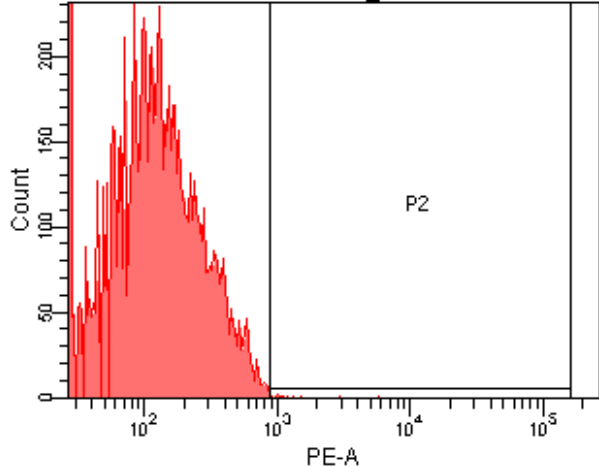

PS HSPs@glucan CD40 isotype

| Population   | #Events | %Parent | %Total |
|--------------|---------|---------|--------|
| ■ All Events | 12,498  | ####    | 100.0  |
| ■ P1         | 10,000  | 80.0    | 80.0   |
| ⊠ P2         | 15      | 0.2     | 0.1    |

PS HSPs@glucan CD40 isotype

| Population   | #Events | %Parent | PE-A Mean |
|--------------|---------|---------|-----------|
| ■ All Events | 12,498  | ####    | 145       |
| ■ P1         | 10,000  | 80.0    | 152       |
| ⊠ P2         | 15      | 0.2     | 1,487     |

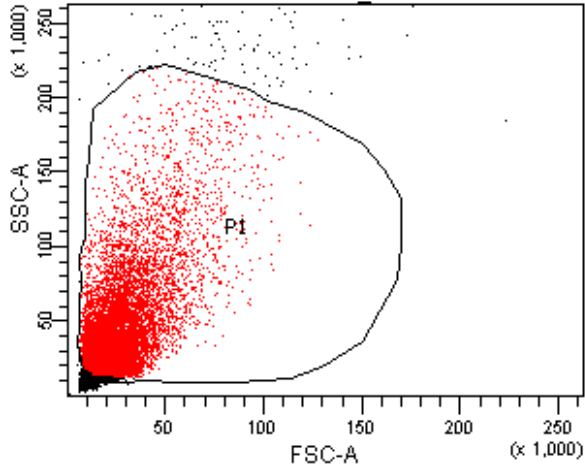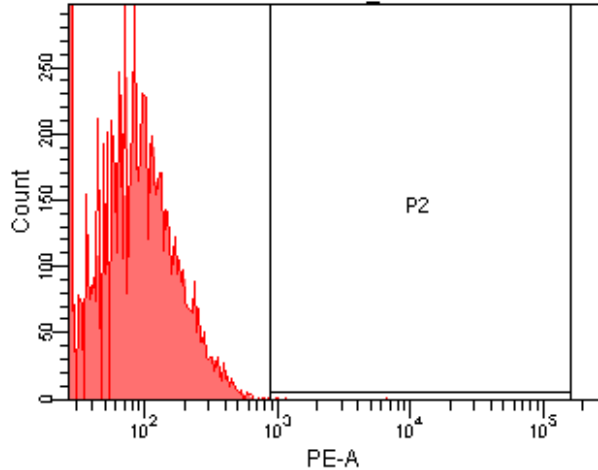

E. coli HSPs CD40 isotype

| Population | #Events | %Parent | %Total |
|------------|---------|---------|--------|
| All Events | 11,639  | ####    | 100.0  |
| P1         | 10,000  | 85.9    | 85.9   |
| P2         | 3       | 0.0     | 0.0    |

E. coli HSPs CD40 isotype

| Population | #Events | %Parent | PE-A Mean |
|------------|---------|---------|-----------|
| All Events | 11,639  | ####    | 97        |
| P1         | 10,000  | 85.9    | 97        |
| P2         | 3       | 0.0     | 2,918     |

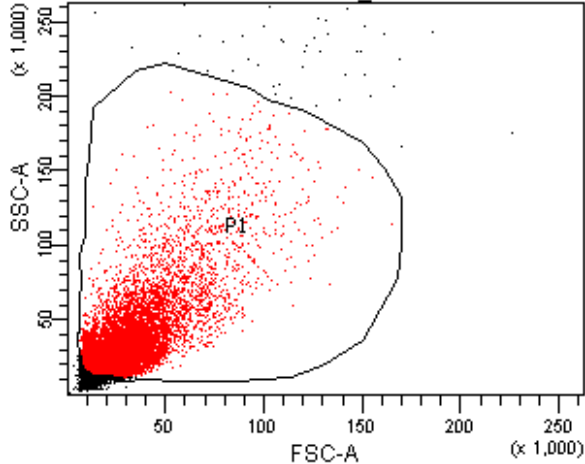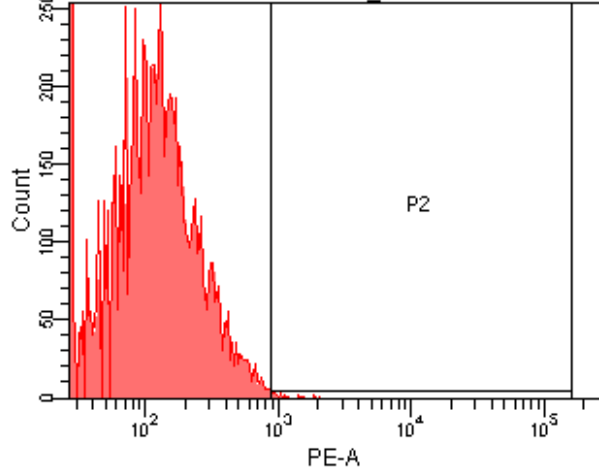

E. coli HSPs@glucan CD40 isotype

| Population   | #Events | %Parent | %Total |
|--------------|---------|---------|--------|
| ■ All Events | 11,920  | ####    | 100.0  |
| ■ P1         | 10,000  | 83.9    | 83.9   |
| ⊠ P2         | 25      | 0.2     | 0.2    |

E. coli HSPs@glucan CD40 isotype

| Population   | #Events | %Parent | PE-A Mean |
|--------------|---------|---------|-----------|
| ■ All Events | 11,920  | ####    | 136       |
| ■ P1         | 10,000  | 83.9    | 145       |
| ⊠ P2         | 25      | 0.2     | 1,170     |

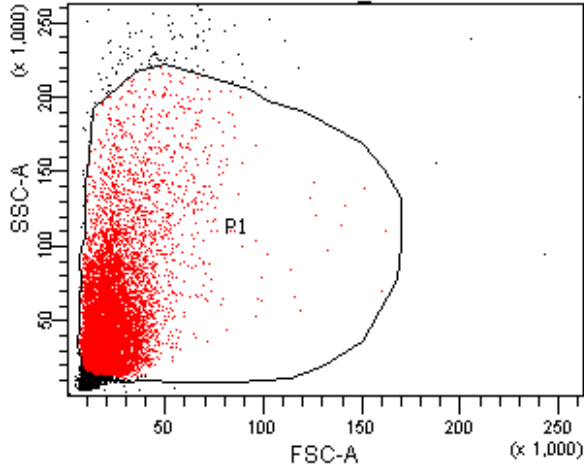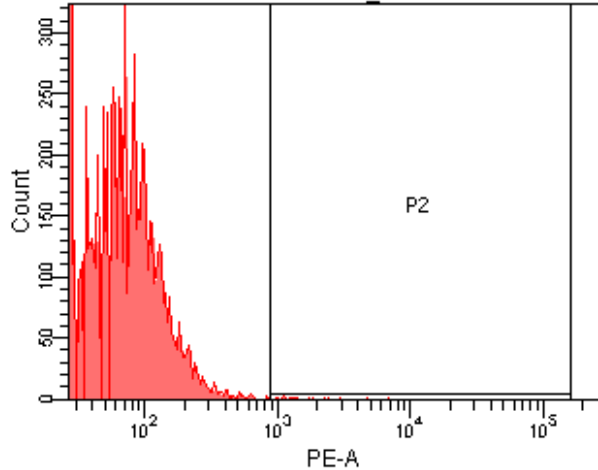

S. aureus HSPs CD40 isotype

| Population | #Events | %Parent | %Total |
|------------|---------|---------|--------|
| All Events | 11,440  | ###     | 100.0  |
| P1         | 10,000  | 87.4    | 87.4   |
| P2         | 17      | 0.2     | 0.1    |

S. aureus HSPs CD40 isotype

| Population | #Events | %Parent | PE-A Mean |
|------------|---------|---------|-----------|
| All Events | 11,440  | ###     | 76        |
| P1         | 10,000  | 87.4    | 70        |
| P2         | 17      | 0.2     | 2,056     |

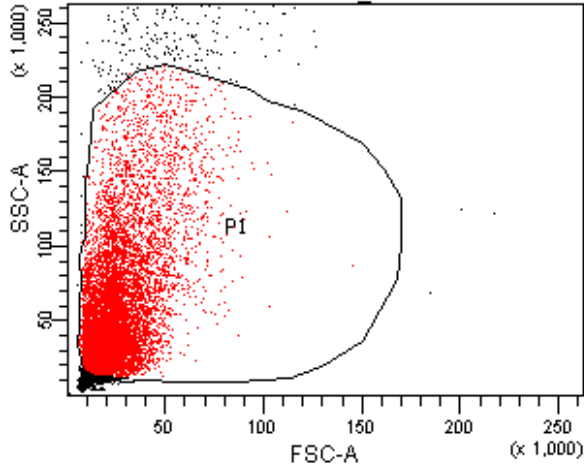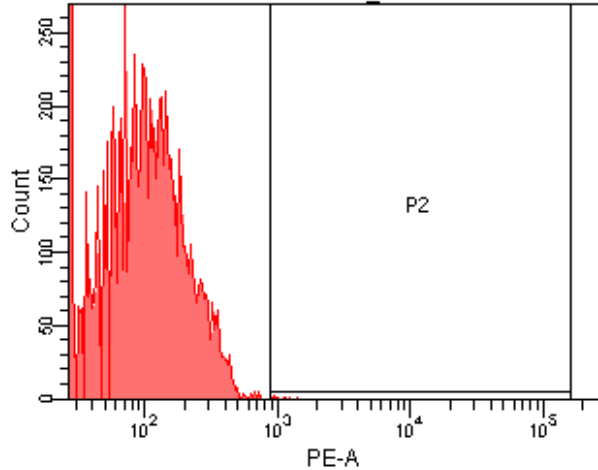

*S. aureus* HSPs@glucan CD40 isotype

| Population | #Events | %Parent | %Total |
|------------|---------|---------|--------|
| All Events | 11,412  | ####    | 100.0  |
| P1         | 10,000  | 87.6    | 87.6   |
| P2         | 9       | 0.1     | 0.1    |

*S. aureus* HSPs@glucan CD40 isotype

| Population | #Events | %Parent | PE-A Mean |
|------------|---------|---------|-----------|
| All Events | 11,412  | ####    | 127       |
| P1         | 10,000  | 87.6    | 114       |
| P2         | 9       | 0.1     | 1,057     |

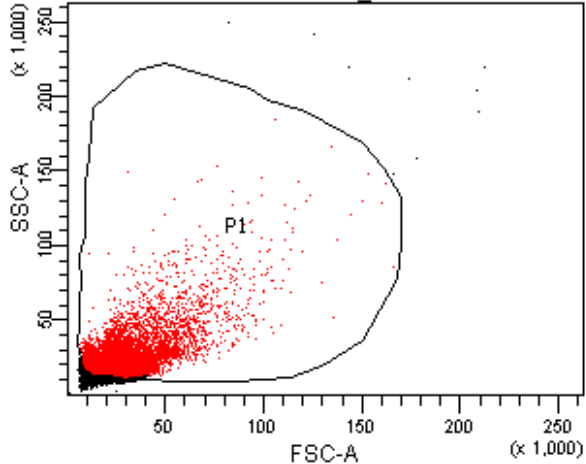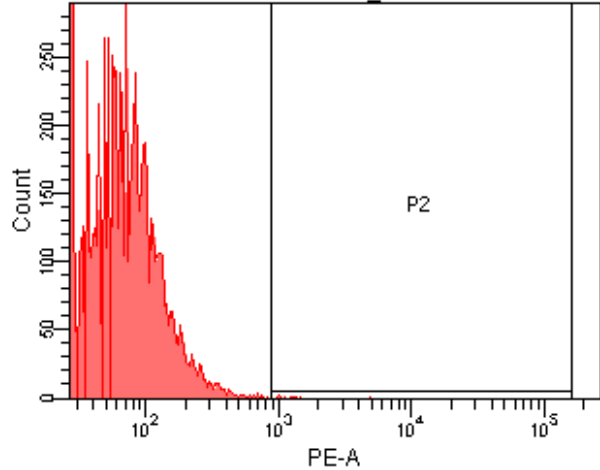

PBS CD40 isotype

| Population | #Events | %Parent | %Total |
|------------|---------|---------|--------|
| All Events | 16,622  | ####    | 100.0  |
| P1         | 10,000  | 60.2    | 60.2   |
| P2         | 11      | 0.1     | 0.1    |

PBS CD40 isotype

| Population | #Events | %Parent | PE-A Mean |
|------------|---------|---------|-----------|
| All Events | 16,622  | ####    | 55        |
| P1         | 10,000  | 60.2    | 65        |
| P2         | 11      | 0.1     | 1,505     |



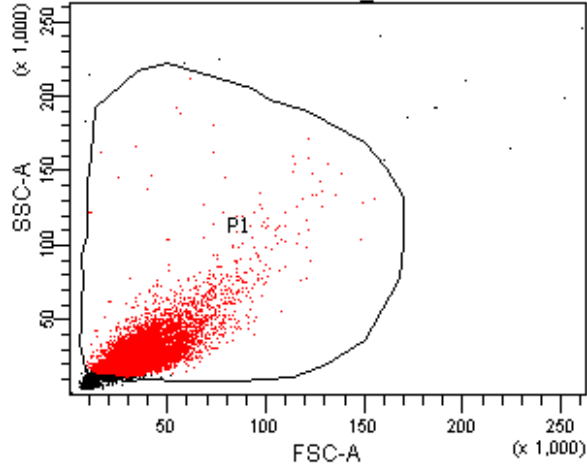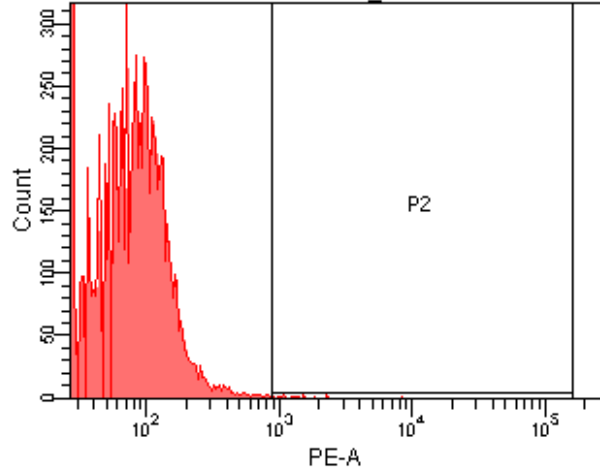

| Population | LPS CD40 isotype |         |        |
|------------|------------------|---------|--------|
|            | #Events          | %Parent | %Total |
| All Events | 10,768           | ###     | 100.0  |
| P1         | 10,000           | 92.9    | 92.9   |
| P2         | 18               | 0.2     | 0.2    |

| Population | LPS CD40 isotype |         |  | PE-A  |
|------------|------------------|---------|--|-------|
|            | #Events          | %Parent |  | Mean  |
| All Events | 10,768           | ###     |  | 86    |
| P1         | 10,000           | 92.9    |  | 84    |
| P2         | 18               | 0.2     |  | 1,755 |

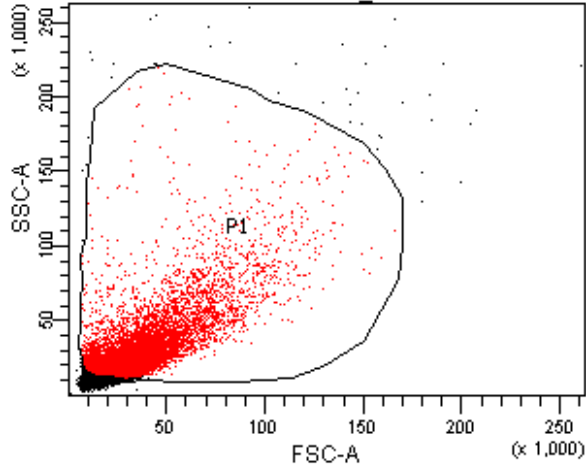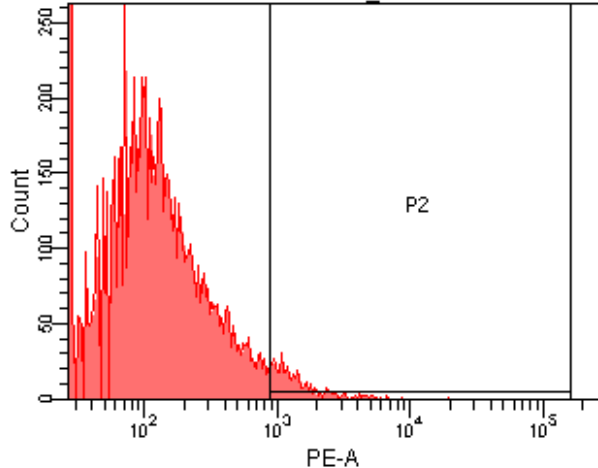

PS HSPs CD40

| Population | #Events | %Parent | %Total |
|------------|---------|---------|--------|
| All Events | 13,590  | ####    | 100.0  |
| P1         | 10,000  | 73.6    | 73.6   |
| P2         | 404     | 4.0     | 3.0    |

PS HSPs CD40

| Population | #Events | %Parent | PE-A Mean |
|------------|---------|---------|-----------|
| All Events | 13,590  | ####    | 174       |
| P1         | 10,000  | 73.6    | 209       |
| P2         | 404     | 4.0     | 1,643     |

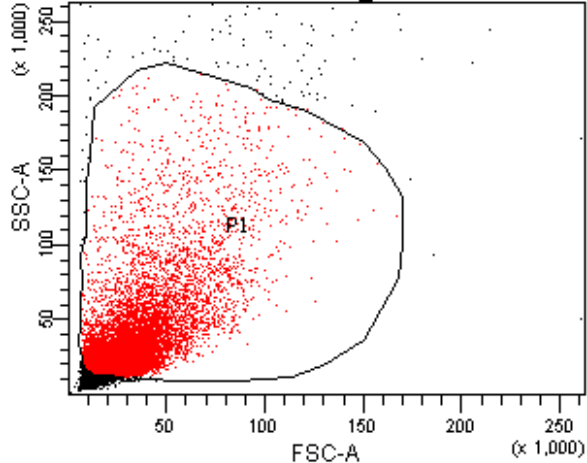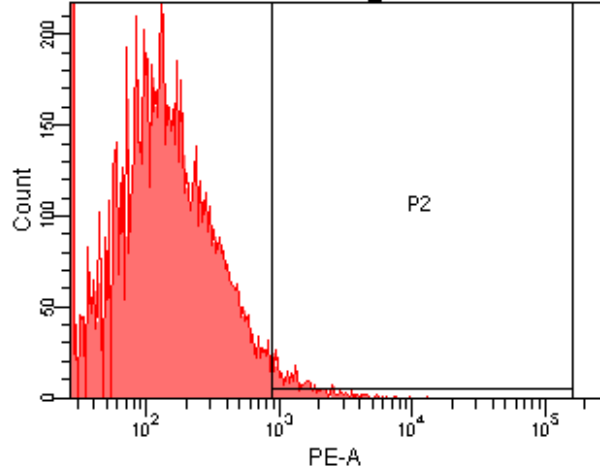

PS HSPs@glucan CD40

| Population | #Events | %Parent | %Total |
|------------|---------|---------|--------|
| All Events | 12,425  | ####    | 100.0  |
| P1         | 10,000  | 80.5    | 80.5   |
| P2         | 318     | 3.2     | 2.6    |

PS HSPs@glucan CD40

| Population | #Events | %Parent | PE-A Mean |
|------------|---------|---------|-----------|
| All Events | 12,425  | ####    | 201       |
| P1         | 10,000  | 80.5    | 222       |
| P2         | 318     | 3.2     | 1,704     |

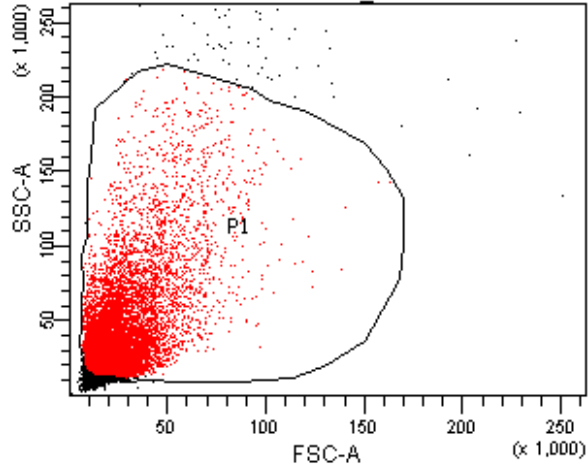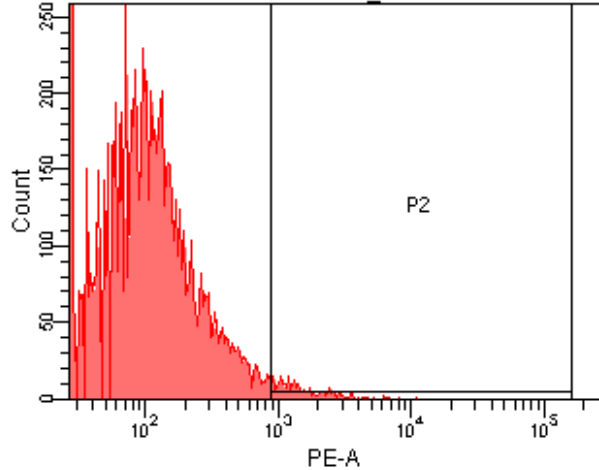

E. coli HSPs CD40

| Population | #Events | %Parent | %Total |
|------------|---------|---------|--------|
| All Events | 11,728  | ####    | 100.0  |
| P1         | 10,000  | 85.3    | 85.3   |
| P2         | 246     | 2.5     | 2.1    |

E. coli HSPs CD40

| Population | #Events | %Parent | PE-A Mean |
|------------|---------|---------|-----------|
| All Events | 11,728  | ####    | 159       |
| P1         | 10,000  | 85.3    | 168       |
| P2         | 246     | 2.5     | 1,733     |

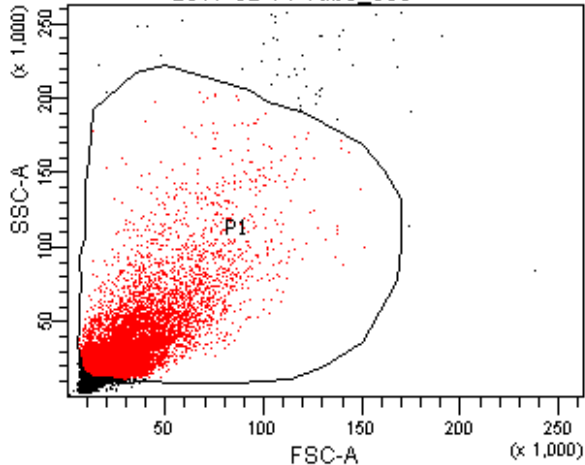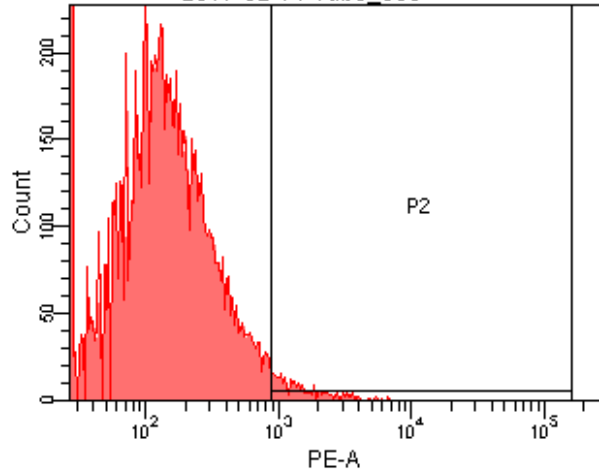

E. coli HSPs@glucan CD40

| Population | #Events | %Parent | %Total |
|------------|---------|---------|--------|
| All Events | 12,237  | ####    | 100.0  |
| P1         | 10,000  | 81.7    | 81.7   |
| P2         | 266     | 2.7     | 2.2    |

E. coli HSPs@glucan CD40

| Population | #Events | %Parent | PE-A Mean |
|------------|---------|---------|-----------|
| All Events | 12,237  | ####    | 194       |
| P1         | 10,000  | 81.7    | 216       |
| P2         | 266     | 2.7     | 1,718     |

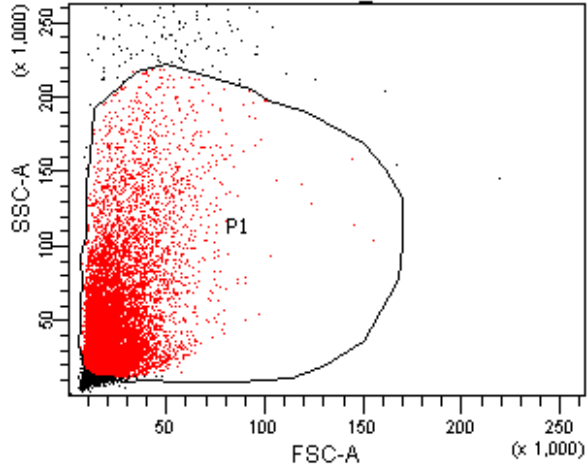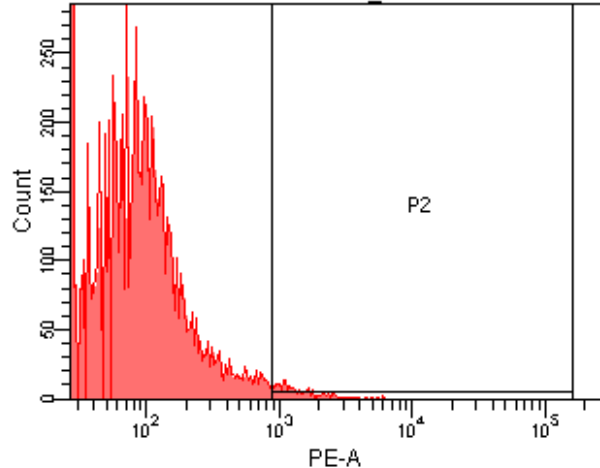

S. aureus HSPs CD40

| Population | #Events | %Parent | %Total |
|------------|---------|---------|--------|
| All Events | 11,115  | ####    | 100.0  |
| P1         | 10,000  | 90.0    | 90.0   |
| P2         | 192     | 1.9     | 1.7    |

S. aureus HSPs CD40

| Population | #Events | %Parent | PE-A Mean |
|------------|---------|---------|-----------|
| All Events | 11,115  | ####    | 133       |
| P1         | 10,000  | 90.0    | 132       |
| P2         | 192     | 1.9     | 1,633     |

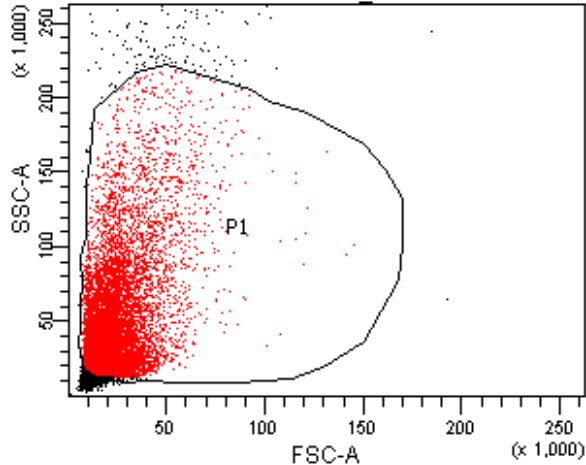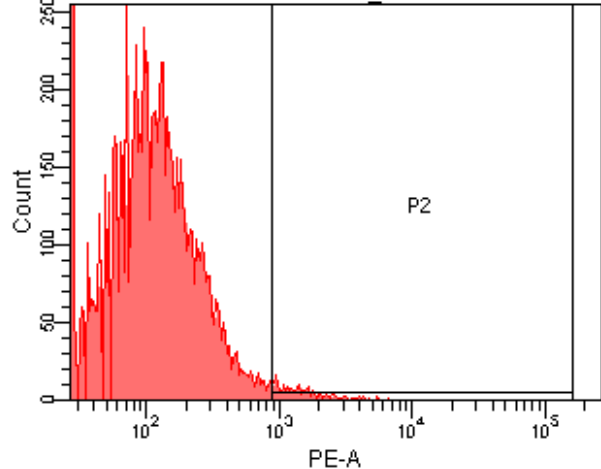

S. aureus HSPs@glucan CD40

| Population   | #Events | %Parent | %Total |
|--------------|---------|---------|--------|
| ■ All Events | 11,649  | ####    | 100.0  |
| ■ P1         | 10,000  | 85.8    | 85.8   |
| ⊠ P2         | 189     | 1.9     | 1.6    |

S. aureus HSPs@glucan CD40

| Population   | #Events | %Parent | PE-A Mean |
|--------------|---------|---------|-----------|
| ■ All Events | 11,649  | ####    | 165       |
| ■ P1         | 10,000  | 85.8    | 162       |
| ⊠ P2         | 189     | 1.9     | 1,678     |

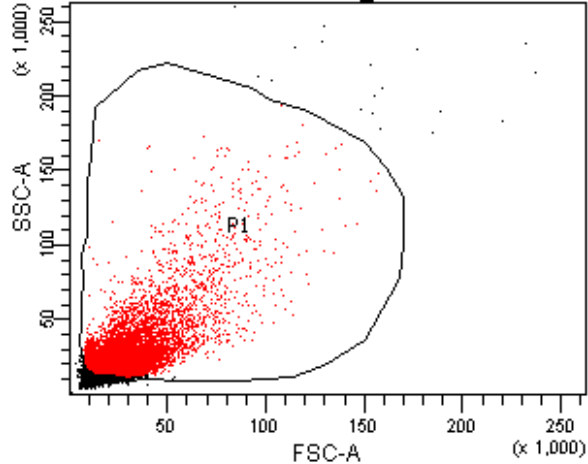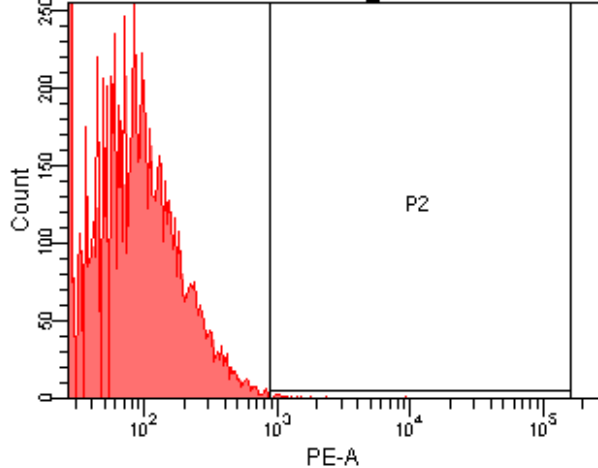

| PBS CD40     |         |         |        |
|--------------|---------|---------|--------|
| Population   | #Events | %Parent | %Total |
| ■ All Events | 16,583  | ####    | 100.0  |
| ■ P1         | 10,000  | 60.3    | 60.3   |
| ⊠ P2         | 16      | 0.2     | 0.1    |

| PBS CD40     |         |         |           |
|--------------|---------|---------|-----------|
| Population   | #Events | %Parent | PE-A Mean |
| ■ All Events | 16,583  | ####    | 82        |
| ■ P1         | 10,000  | 60.3    | 102       |
| ⊠ P2         | 16      | 0.2     | 1,752     |



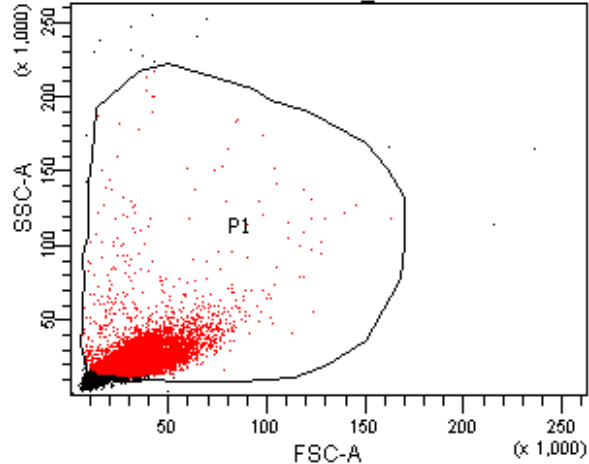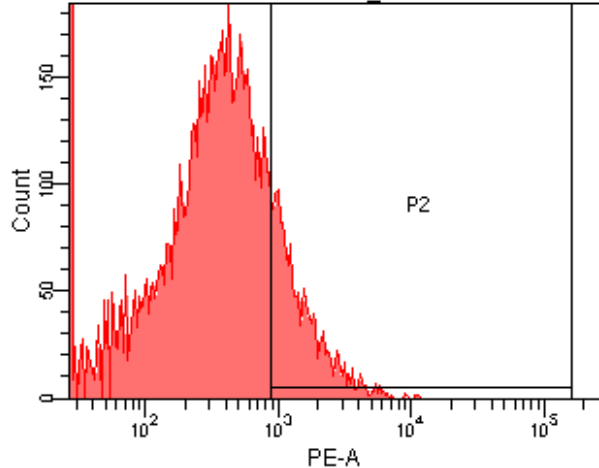

| LPS CD40     |         |         |        |
|--------------|---------|---------|--------|
| Population   | #Events | %Parent | %Total |
| ■ All Events | 11,620  | ####    | 100.0  |
| ■ P1         | 10,000  | 86.1    | 86.1   |
| ⊠ P2         | 1,735   | 17.3    | 14.9   |

| LPS CD40     |         |         |           |
|--------------|---------|---------|-----------|
| Population   | #Events | %Parent | PE-A Mean |
| ■ All Events | 11,620  | ####    | 509       |
| ■ P1         | 10,000  | 86.1    | 559       |
| ⊠ P2         | 1,735   | 17.3    | 1,644     |

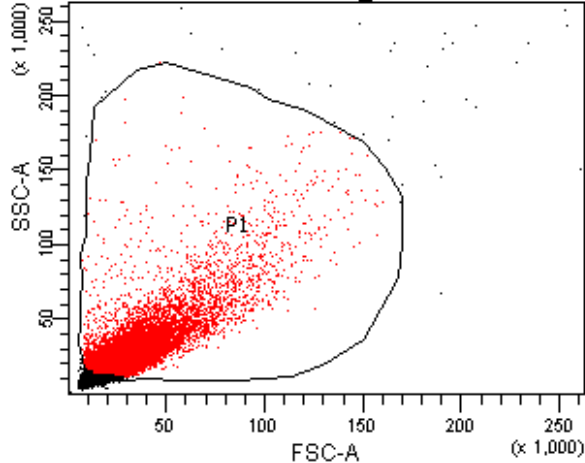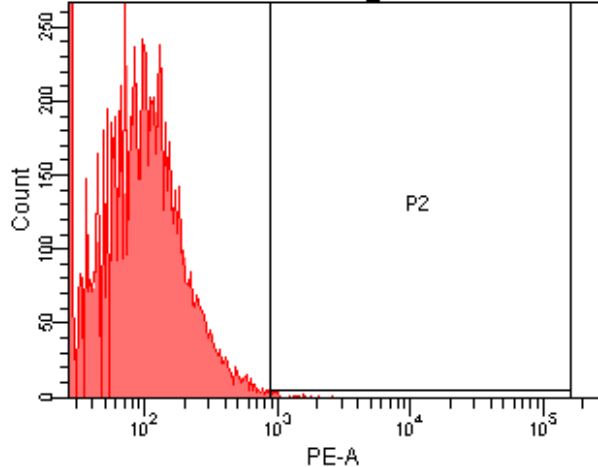

PS HSPs CD80 isotype

| Population | #Events | %Parent | %Total |
|------------|---------|---------|--------|
| All Events | 12,900  | ####    | 100.0  |
| P1         | 10,000  | 77.5    | 77.5   |
| P2         | 20      | 0.2     | 0.2    |

PS HSPs CD80 isotype

| Population | #Events | %Parent | PE-A Mean |
|------------|---------|---------|-----------|
| All Events | 12,900  | ####    | 107       |
| P1         | 10,000  | 77.5    | 113       |
| P2         | 20      | 0.2     | 1,295     |

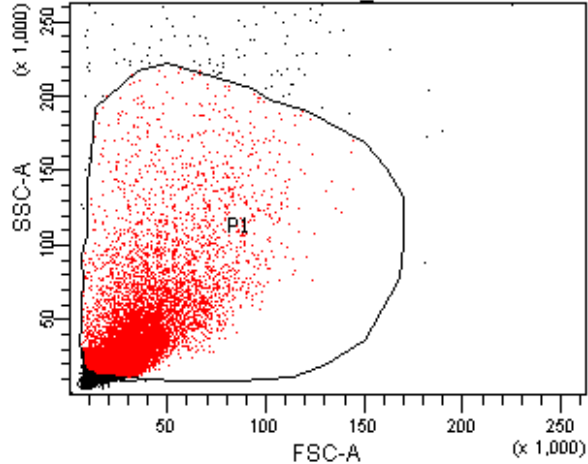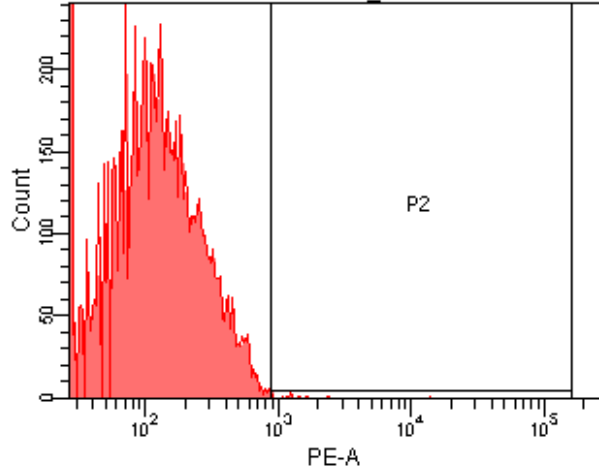

PS HSPs@glucan CD80 isotype

| Population | #Events | %Parent | %Total |
|------------|---------|---------|--------|
| All Events | 12,086  | ####    | 100.0  |
| P1         | 10,000  | 82.7    | 82.7   |
| P2         | 19      | 0.2     | 0.2    |

PS HSPs@glucan CD80 isotype

| Population | #Events | %Parent | PE-A Mean |
|------------|---------|---------|-----------|
| All Events | 12,086  | ####    | 145       |
| P1         | 10,000  | 82.7    | 151       |
| P2         | 19      | 0.2     | 1,939     |

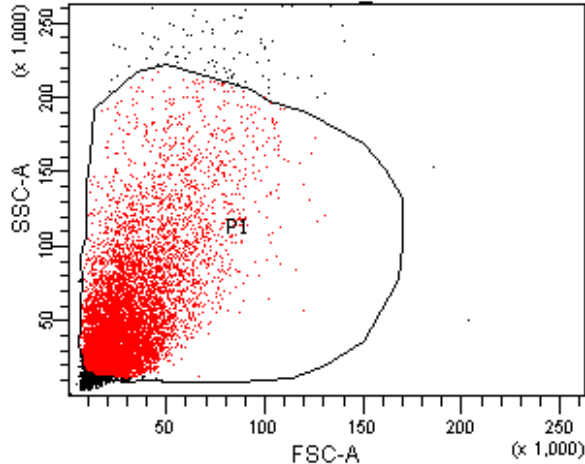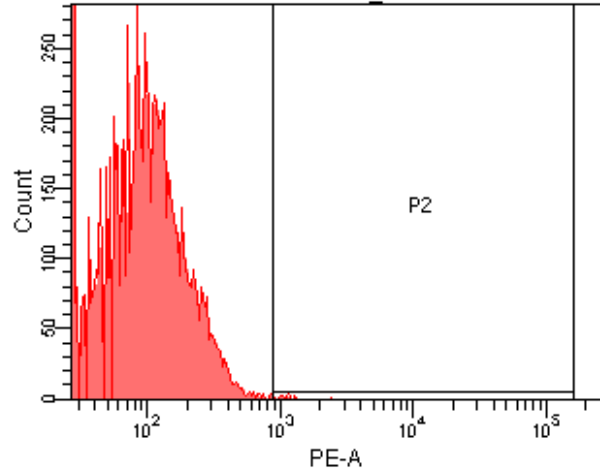

E. coli HSPs CD80 isotype

| Population | #Events | %Parent | %Total |
|------------|---------|---------|--------|
| All Events | 11,167  | ####    | 100.0  |
| P1         | 10,000  | 89.5    | 89.5   |
| P2         | 17      | 0.2     | 0.2    |

E. coli HSPs CD80 isotype

| Population | #Events | %Parent | PE-A Mean |
|------------|---------|---------|-----------|
| All Events | 11,167  | ####    | 114       |
| P1         | 10,000  | 89.5    | 108       |
| P2         | 17      | 0.2     | 1,168     |

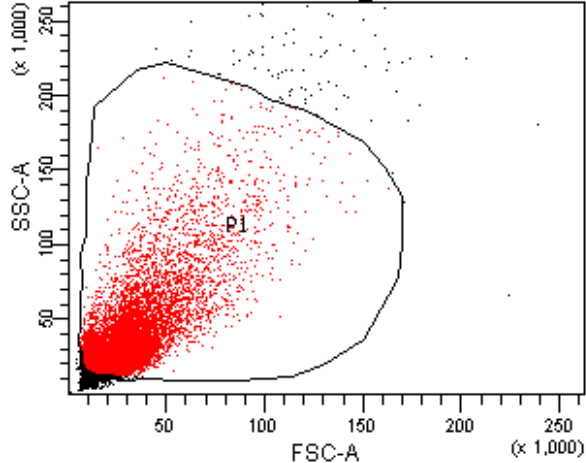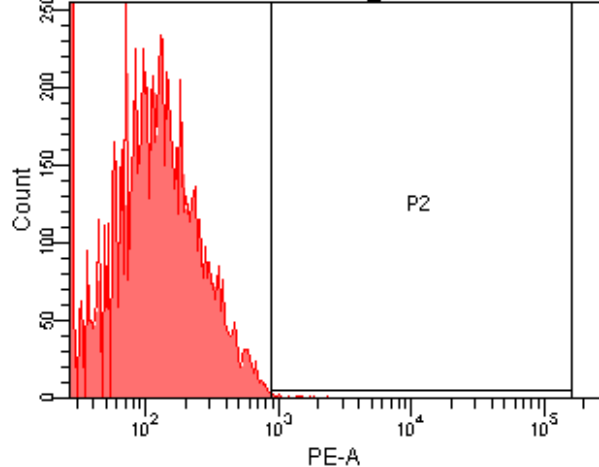

E. coli HSPs@glucan CD80 isotype

| Population | #Events | %Parent | %Total |
|------------|---------|---------|--------|
| All Events | 11,621  | ####    | 100.0  |
| P1         | 10,000  | 86.1    | 86.1   |
| P2         | 15      | 0.2     | 0.1    |

E. coli HSPs@glucan CD80 isotype

| Population | #Events | %Parent | PE-A Mean |
|------------|---------|---------|-----------|
| All Events | 11,621  | ####    | 146       |
| P1         | 10,000  | 86.1    | 149       |
| P2         | 15      | 0.2     | 1,291     |

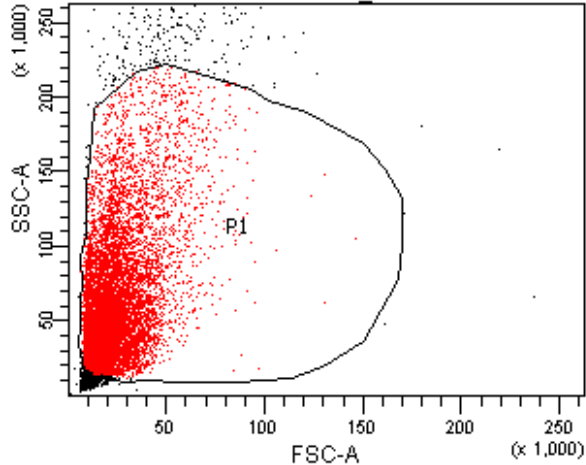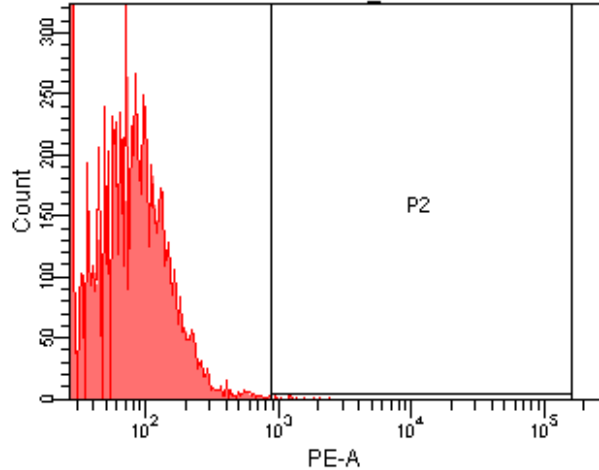

S. aureus HSPs CD80 isotype

| Population | #Events | %Parent | %Total |
|------------|---------|---------|--------|
| All Events | 11,123  | ###     | 100.0  |
| P1         | 10,000  | 89.9    | 89.9   |
| P2         | 13      | 0.1     | 0.1    |

S. aureus HSPs CD80 isotype

| Population | #Events | %Parent | PE-A Mean |
|------------|---------|---------|-----------|
| All Events | 11,123  | ###     | 96        |
| P1         | 10,000  | 89.9    | 83        |
| P2         | 13      | 0.1     | 1,373     |

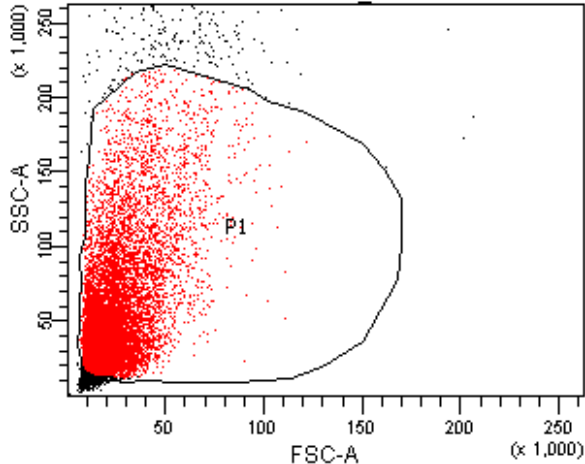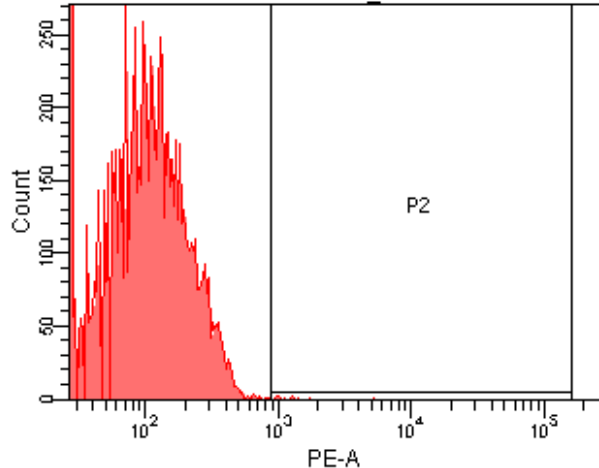

S. aureus HSPs@glucan CD80 isotype

| Population | #Events | %Parent | %Total |
|------------|---------|---------|--------|
| All Events | 11,300  | ####    | 100.0  |
| P1         | 10,000  | 88.5    | 88.5   |
| P2         | 12      | 0.1     | 0.1    |

S. aureus HSPs@glucan CD80 isotype

| Population | #Events | %Parent | PE-A Mean |
|------------|---------|---------|-----------|
| All Events | 11,300  | ####    | 136       |
| P1         | 10,000  | 88.5    | 119       |
| P2         | 12      | 0.1     | 1,543     |

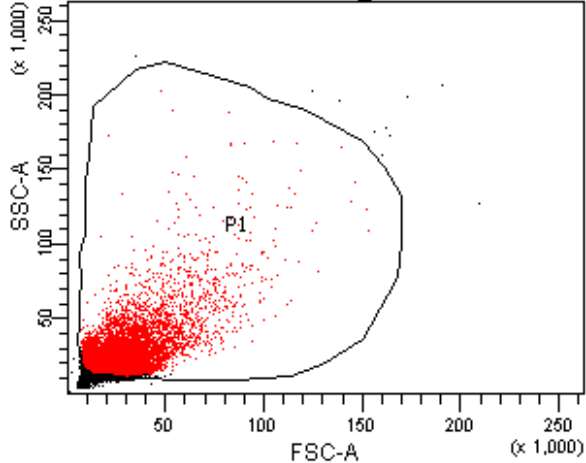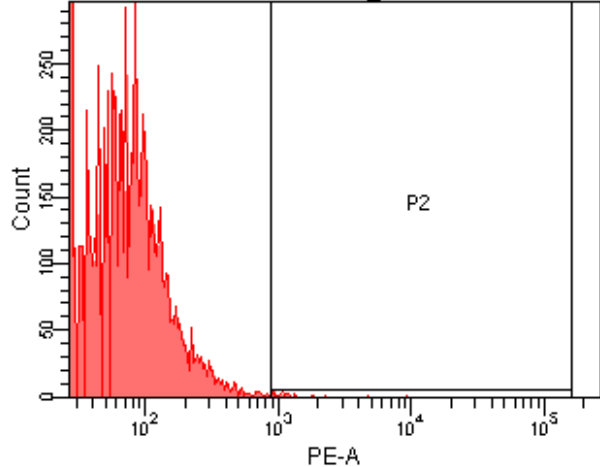

PBS CD80 isotype

| Population | #Events | %Parent | %Total |
|------------|---------|---------|--------|
| All Events | 13,589  | ####    | 100.0  |
| P1         | 10,000  | 73.6    | 73.6   |
| P2         | 24      | 0.2     | 0.2    |

PBS CD80 isotype

| Population | #Events | %Parent | PE-A Mean |
|------------|---------|---------|-----------|
| All Events | 13,589  | ####    | 67        |
| P1         | 10,000  | 73.6    | 76        |
| P2         | 24      | 0.2     | 1,682     |



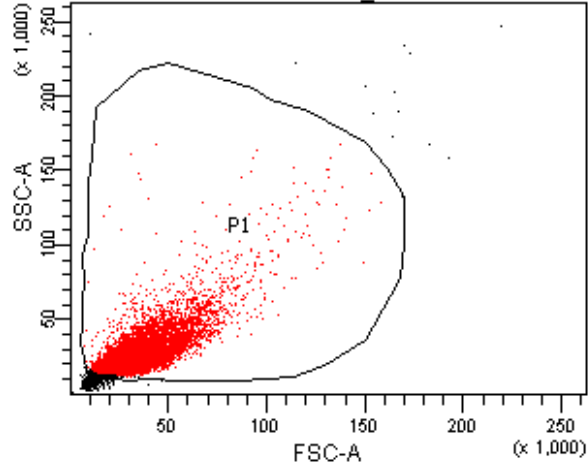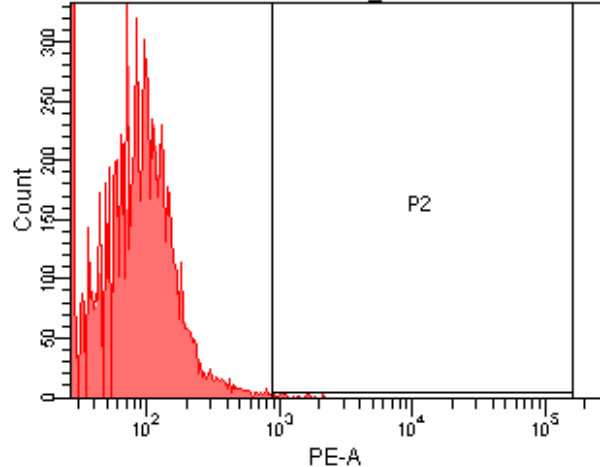

| LPS CD80 isotype |         |         |        |
|------------------|---------|---------|--------|
| Population       | #Events | %Parent | %Total |
| ■ All Events     | 10,692  | ####    | 100.0  |
| ■ P1             | 10,000  | 93.5    | 93.5   |
| ⊠ P2             | 25      | 0.2     | 0.2    |

| LPS CD80 isotype |         |         |           |
|------------------|---------|---------|-----------|
| Population       | #Events | %Parent | PE-A Mean |
| ■ All Events     | 10,692  | ####    | 102       |
| ■ P1             | 10,000  | 93.5    | 96        |
| ⊠ P2             | 25      | 0.2     | 1,282     |

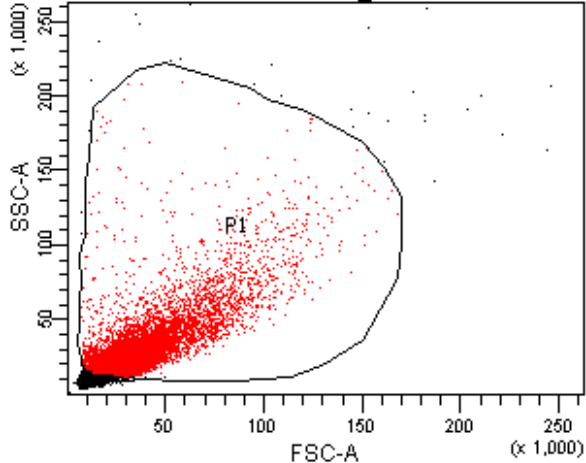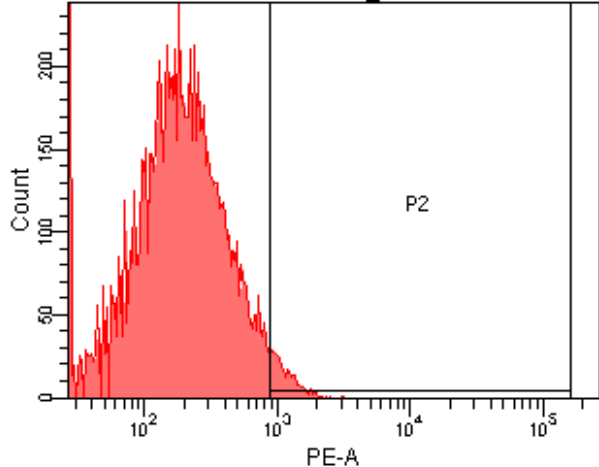

PS HSPs CD80

| Population | #Events | %Parent | %Total |
|------------|---------|---------|--------|
| All Events | 13,475  | ####    | 100.0  |
| P1         | 10,000  | 74.2    | 74.2   |
| P2         | 307     | 3.1     | 2.3    |

PS HSPs CD80

| Population | #Events | %Parent | PE-A Mean |
|------------|---------|---------|-----------|
| All Events | 13,475  | ####    | 213       |
| P1         | 10,000  | 74.2    | 256       |
| P2         | 307     | 3.1     | 1,180     |

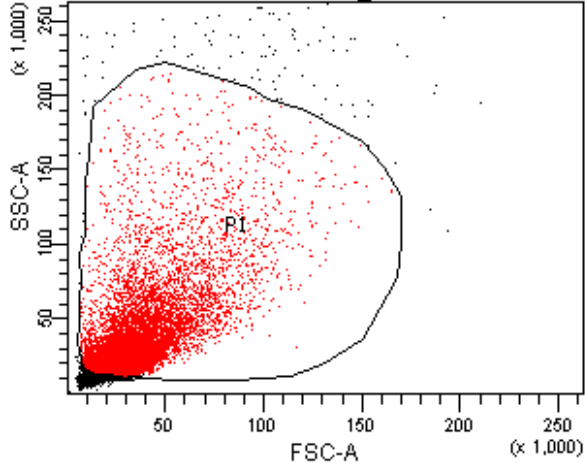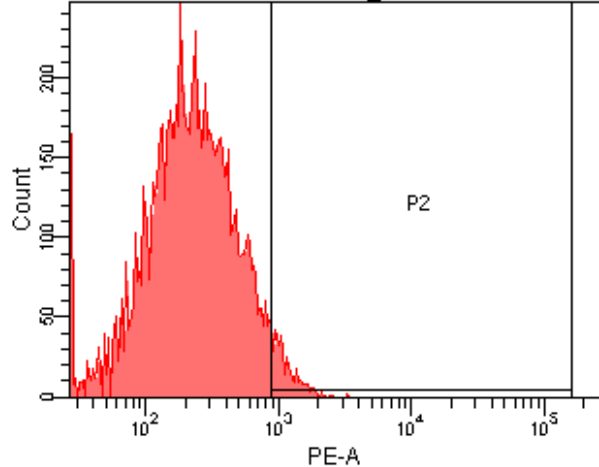

PS HSPs@glucan CD80

| Population   | #Events | %Parent | %Total |
|--------------|---------|---------|--------|
| ■ All Events | 12,226  | ####    | 100.0  |
| ■ P1         | 10,000  | 81.8    | 81.8   |
| ⊠ P2         | 406     | 4.1     | 3.3    |

PS HSPs@glucan CD80

| Population   | #Events | %Parent | PE-A Mean |
|--------------|---------|---------|-----------|
| ■ All Events | 12,226  | ####    | 283       |
| ■ P1         | 10,000  | 81.8    | 297       |
| ⊠ P2         | 406     | 4.1     | 1,169     |

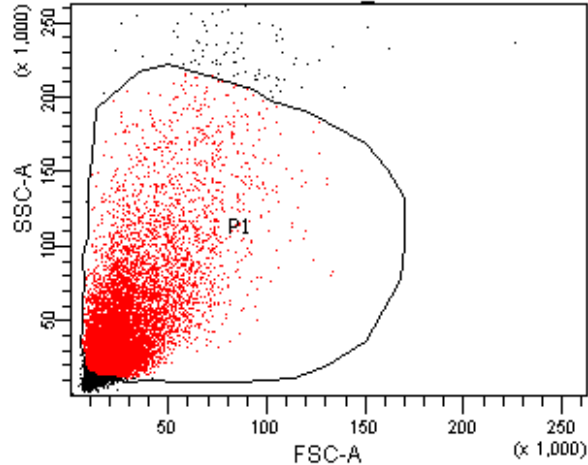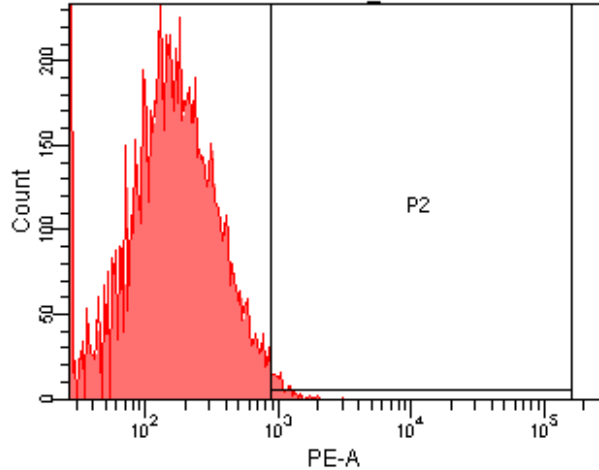

E. coli HSPs CD80

| Population | #Events | %Parent | %Total |
|------------|---------|---------|--------|
| All Events | 11,608  | ####    | 100.0  |
| P1         | 10,000  | 86.1    | 86.1   |
| P2         | 130     | 1.3     | 1.1    |

E. coli HSPs CD80

| Population | #Events | %Parent | PE-A Mean |
|------------|---------|---------|-----------|
| All Events | 11,608  | ####    | 209       |
| P1         | 10,000  | 86.1    | 214       |
| P2         | 130     | 1.3     | 1,113     |

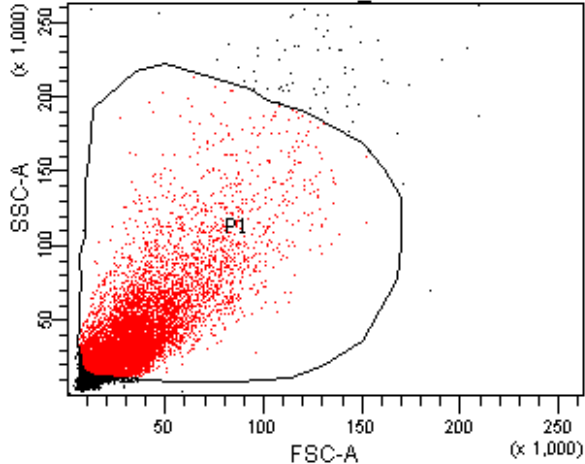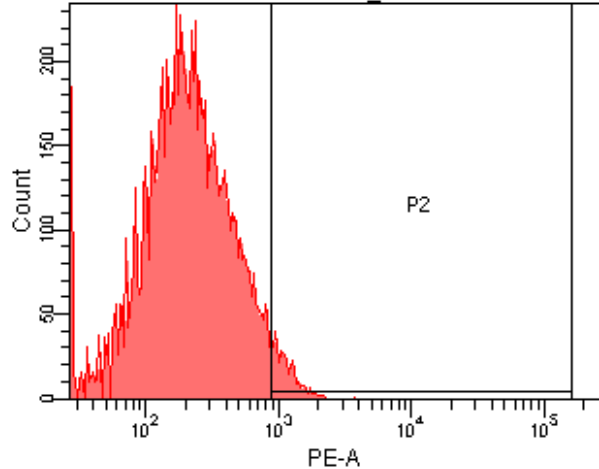

E. coli HSPs@glucan CD80

| Population | #Events | %Parent | %Total |
|------------|---------|---------|--------|
| All Events | 12,274  | ####    | 100.0  |
| P1         | 10,000  | 81.5    | 81.5   |
| P2         | 375     | 3.8     | 3.1    |

E. coli HSPs@glucan CD80

| Population | #Events | %Parent | PE-A Mean |
|------------|---------|---------|-----------|
| All Events | 12,274  | ####    | 262       |
| P1         | 10,000  | 81.5    | 281       |
| P2         | 375     | 3.8     | 1,167     |

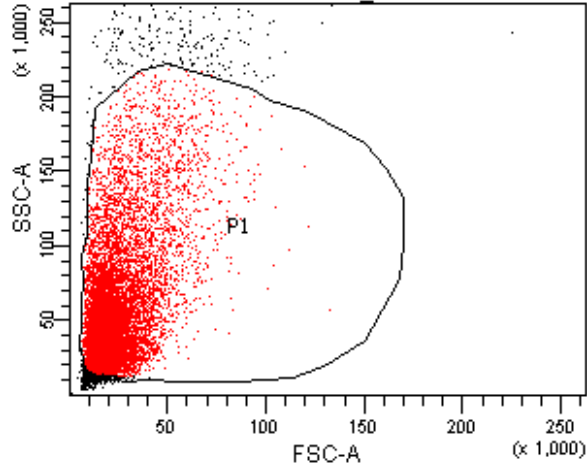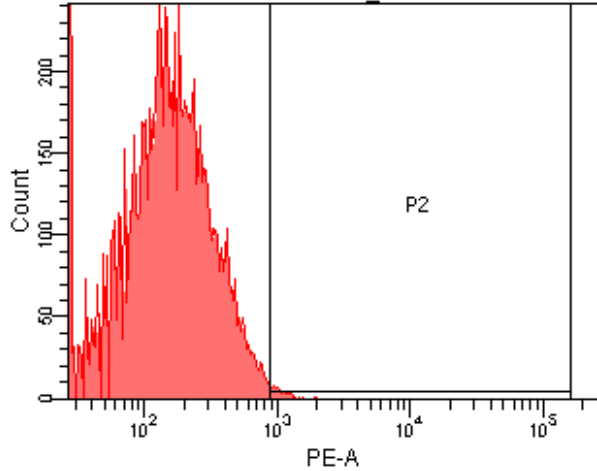

| S. aureus HSPs CD80 |         |         |        |
|---------------------|---------|---------|--------|
| Population          | #Events | %Parent | %Total |
| All Events          | 11,137  | ####    | 100.0  |
| P1                  | 10,000  | 89.8    | 89.8   |
| P2                  | 59      | 0.6     | 0.5    |

| S. aureus HSPs CD80 |         |         |           |
|---------------------|---------|---------|-----------|
| Population          | #Events | %Parent | PE-A Mean |
| All Events          | 11,137  | ####    | 207       |
| P1                  | 10,000  | 89.8    | 191       |
| P2                  | 59      | 0.6     | 1,083     |

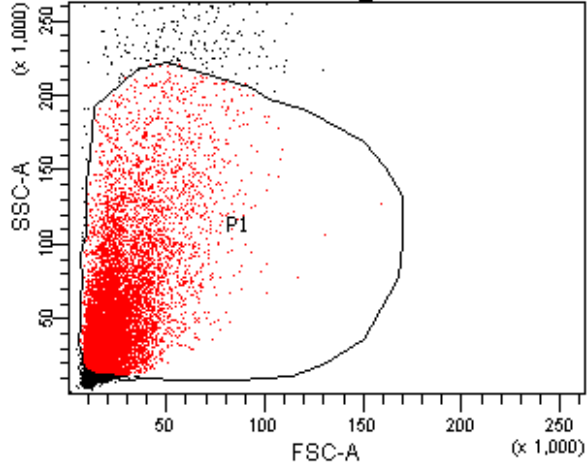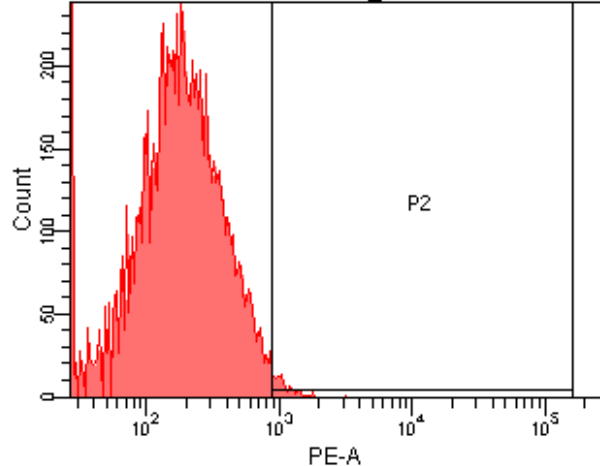

S. aureus HSPs@glucan CD80

| Population   | #Events | %Parent | %Total |
|--------------|---------|---------|--------|
| ■ All Events | 11,560  | ####    | 100.0  |
| ■ P1         | 10,000  | 86.5    | 86.5   |
| ⊠ P2         | 111     | 1.1     | 1.0    |

S. aureus HSPs@glucan CD80

| Population   | #Events | %Parent | PE-A Mean |
|--------------|---------|---------|-----------|
| ■ All Events | 11,560  | ####    | 244       |
| ■ P1         | 10,000  | 86.5    | 229       |
| ⊠ P2         | 111     | 1.1     | 1,110     |

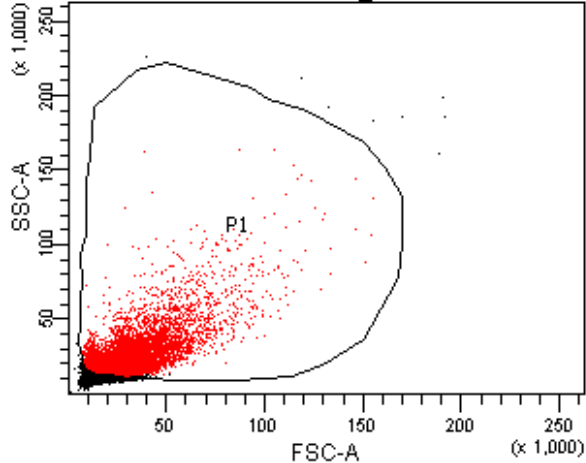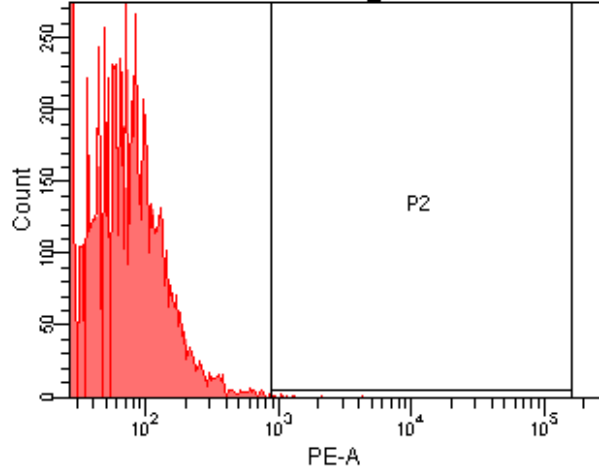

PBS CD80

| Population | #Events | %Parent | %Total |
|------------|---------|---------|--------|
| All Events | 16,327  | ####    | 100.0  |
| P1         | 10,000  | 61.2    | 61.2   |
| P2         | 11      | 0.1     | 0.1    |

PBS CD80

| Population | #Events | %Parent | PE-A Mean |
|------------|---------|---------|-----------|
| All Events | 16,327  | ####    | 58        |
| P1         | 10,000  | 61.2    | 72        |
| P2         | 11      | 0.1     | 1,449     |



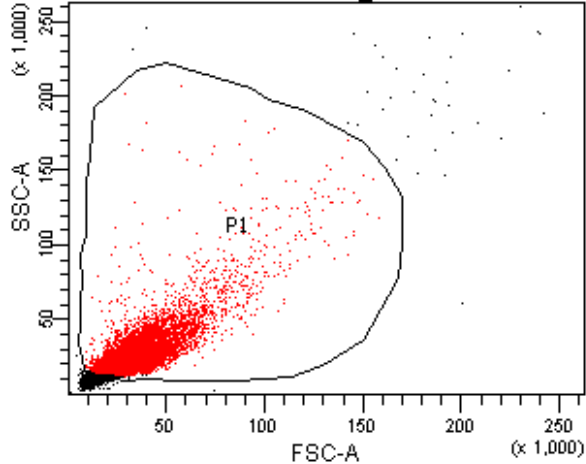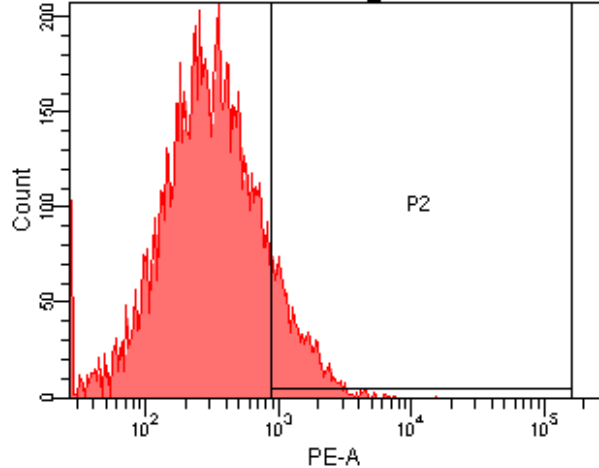

| LPS CD80     |         |         |        |
|--------------|---------|---------|--------|
| Population   | #Events | %Parent | %Total |
| ■ All Events | 11,327  | ####    | 100.0  |
| ■ P1         | 10,000  | 88.3    | 88.3   |
| ⊠ P2         | 1,216   | 12.2    | 10.7   |

| LPS CD80     |         |         | PE-A  |
|--------------|---------|---------|-------|
| Population   | #Events | %Parent | Mean  |
| ■ All Events | 11,327  | ####    | 430   |
| ■ P1         | 10,000  | 88.3    | 460   |
| ⊠ P2         | 1,216   | 12.2    | 1,499 |

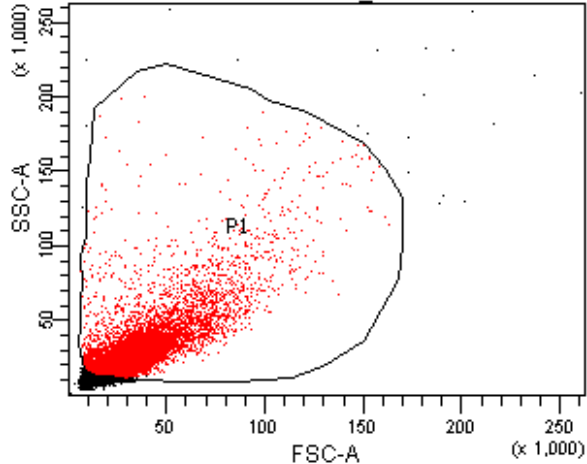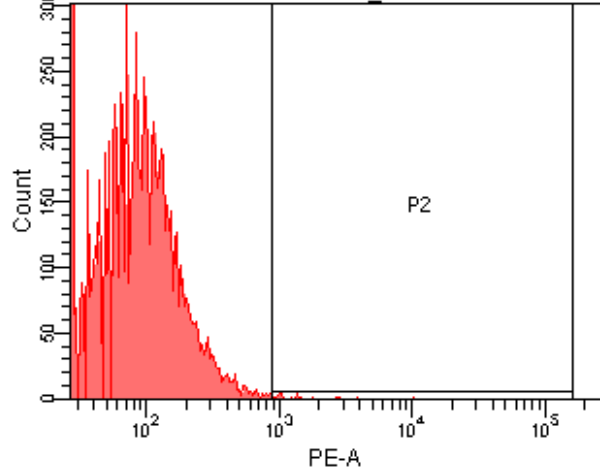

PS HSPs CD86 isotype

| Population | #Events | %Parent | %Total |
|------------|---------|---------|--------|
| All Events | 13,774  | ####    | 100.0  |
| P1         | 10,000  | 72.6    | 72.6   |
| P2         | 21      | 0.2     | 0.2    |

PS HSPs CD86 isotype

| Population | #Events | %Parent | PE-A Mean |
|------------|---------|---------|-----------|
| All Events | 13,774  | ####    | 86        |
| P1         | 10,000  | 72.6    | 99        |
| P2         | 21      | 0.2     | 1,876     |

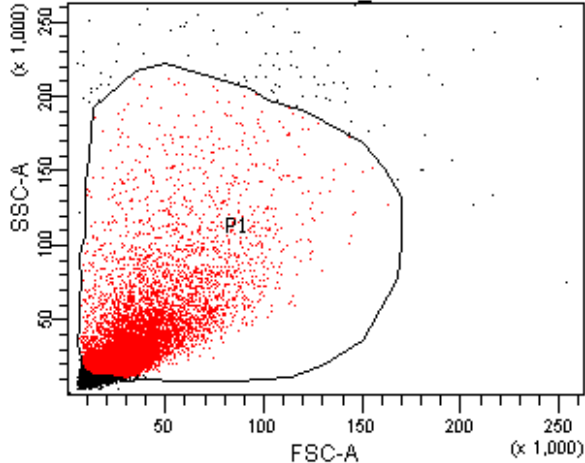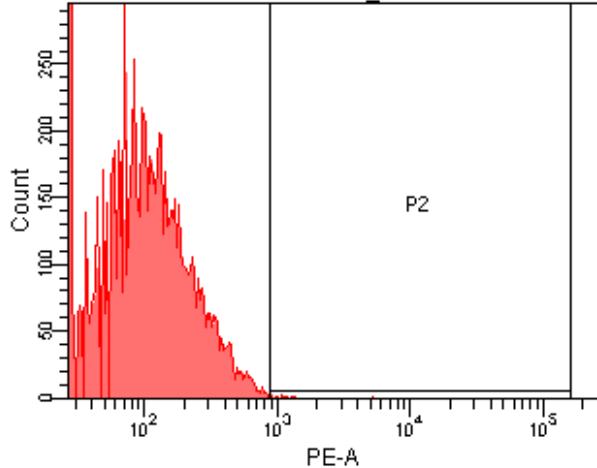

PS HSPs@glucan CD86 isotype

| Population | #Events | %Parent | %Total |
|------------|---------|---------|--------|
| All Events | 13,071  | ####    | 100.0  |
| P1         | 10,000  | 76.5    | 76.5   |
| P2         | 14      | 0.1     | 0.1    |

PS HSPs@glucan CD86 isotype

| Population | #Events | %Parent | PE-A Mean |
|------------|---------|---------|-----------|
| All Events | 13,071  | ####    | 116       |
| P1         | 10,000  | 76.5    | 125       |
| P2         | 14      | 0.1     | 1,381     |

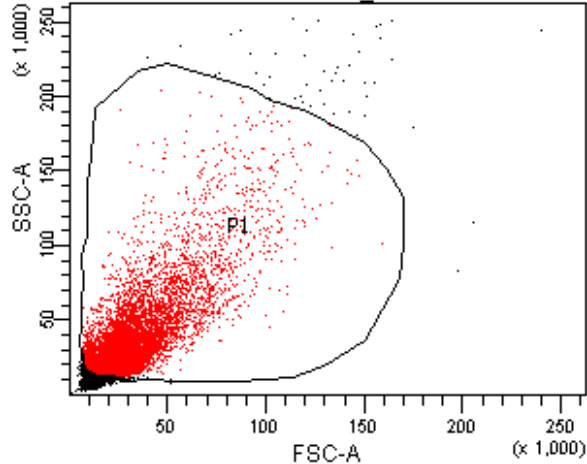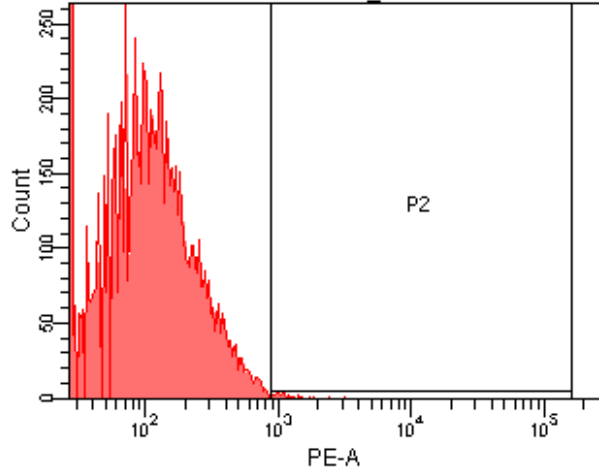

E. coli HSPs CD86 isotype

| Population | #Events | %Parent | %Total |
|------------|---------|---------|--------|
| All Events | 12,959  | ####    | 100.0  |
| P1         | 10,000  | 77.2    | 77.2   |
| P2         | 29      | 0.3     | 0.2    |

E. coli HSPs CD86 isotype

| Population | #Events | %Parent | PE-A Mean |
|------------|---------|---------|-----------|
| All Events | 12,959  | ####    | 122       |
| P1         | 10,000  | 77.2    | 134       |
| P2         | 29      | 0.3     | 1,261     |

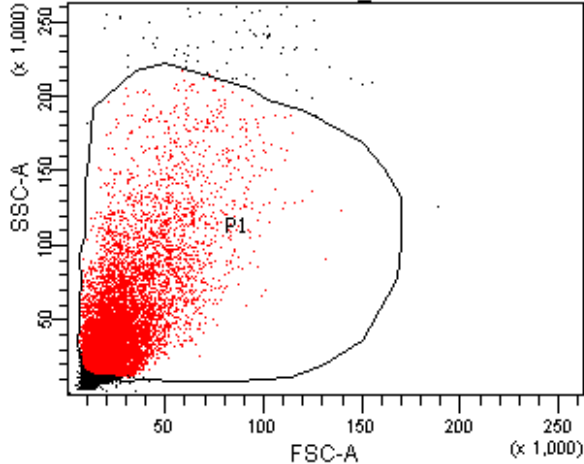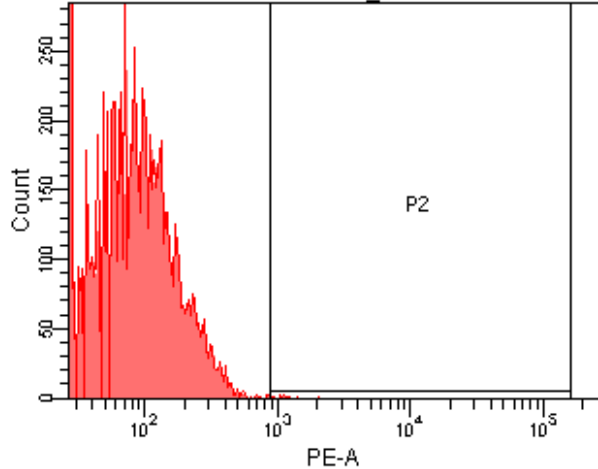

E. coli HSPs@glucan CD86 isotype

| Population | #Events | %Parent | %Total |
|------------|---------|---------|--------|
| All Events | 11,790  | ####    | 100.0  |
| P1         | 10,000  | 84.8    | 84.8   |
| P2         | 15      | 0.2     | 0.1    |

E. coli HSPs@glucan CD86 isotype

| Population | #Events | %Parent | PE-A Mean |
|------------|---------|---------|-----------|
| All Events | 11,790  | ####    | 91        |
| P1         | 10,000  | 84.8    | 93        |
| P2         | 15      | 0.2     | 1,120     |

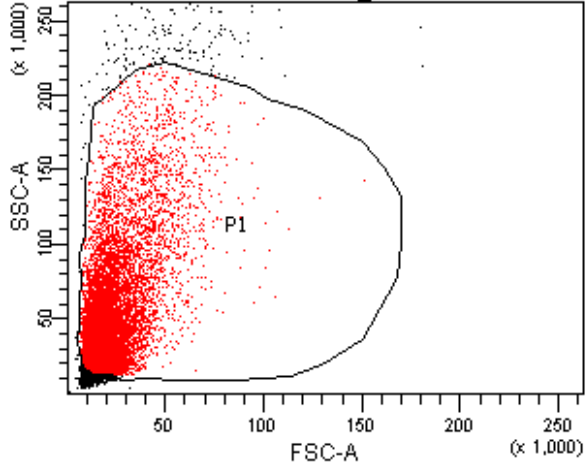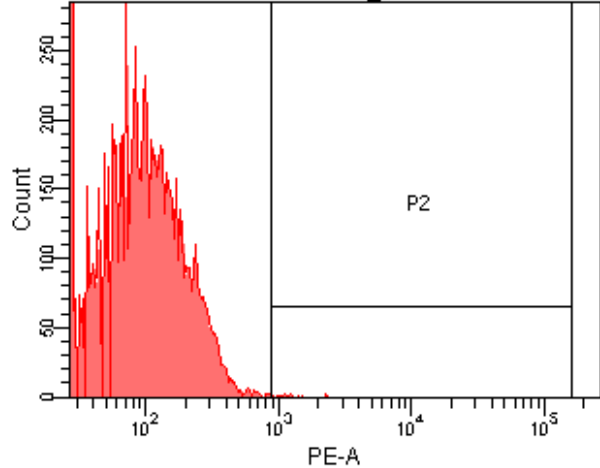

S. aureus HSPs CD86 isotype

| Population | #Events | %Parent | %Total |
|------------|---------|---------|--------|
| All Events | 11,687  | ####    | 100.0  |
| P1         | 10,000  | 85.6    | 85.6   |
| P2         | 16      | 0.2     | 0.1    |

S. aureus HSPs CD86 isotype

| Population | #Events | %Parent | PE-A Mean |
|------------|---------|---------|-----------|
| All Events | 11,687  | ####    | 116       |
| P1         | 10,000  | 85.6    | 108       |
| P2         | 16      | 0.2     | 1,259     |

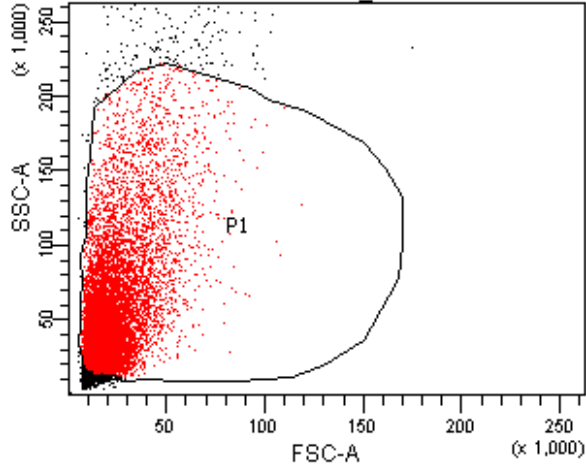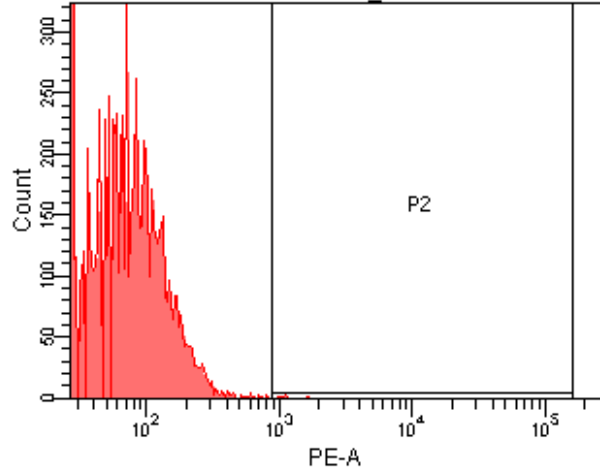

S. aureus HSPs@glucan CD86 isotype

| Population | #Events | %Parent | %Total |
|------------|---------|---------|--------|
| All Events | 11,132  | ####    | 100.0  |
| P1         | 10,000  | 89.8    | 89.8   |
| P2         | 8       | 0.1     | 0.1    |

S. aureus HSPs@glucan CD86 isotype

| Population | #Events | %Parent | PE-A Mean |
|------------|---------|---------|-----------|
| All Events | 11,132  | ####    | 78        |
| P1         | 10,000  | 89.8    | 71        |
| P2         | 8       | 0.1     | 1,138     |

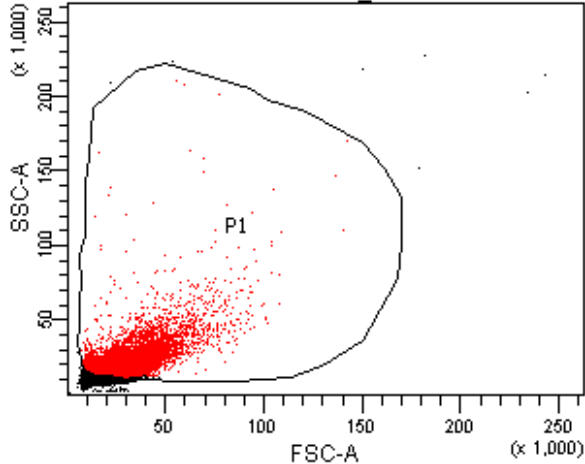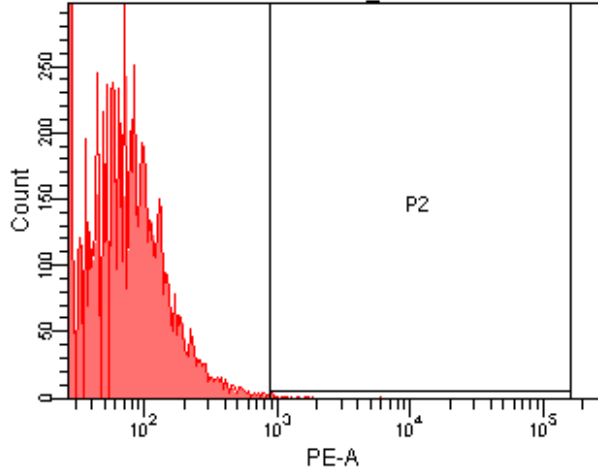

PBS CD86 isotype

| Population | #Events | %Parent | %Total |
|------------|---------|---------|--------|
| All Events | 25,798  | ####    | 100.0  |
| P1         | 10,000  | 38.8    | 38.8   |
| P2         | 20      | 0.2     | 0.1    |

PBS CD86 isotype

| Population | #Events | %Parent | PE-A Mean |
|------------|---------|---------|-----------|
| All Events | 25,798  | ####    | 54        |
| P1         | 10,000  | 38.8    | 77        |
| P2         | 20      | 0.2     | 1,395     |



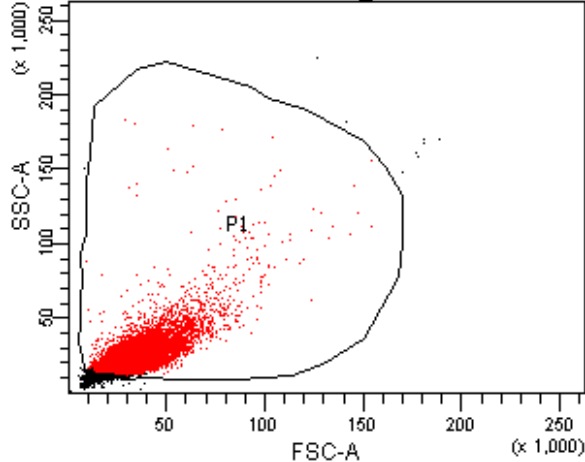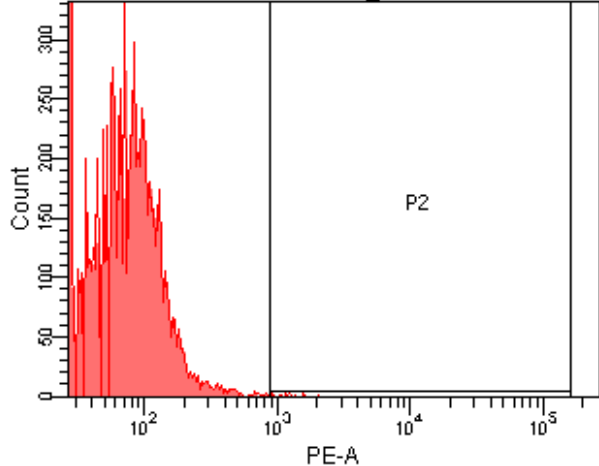

| LPS CD86 isotype |         |         |        |
|------------------|---------|---------|--------|
| Population       | #Events | %Parent | %Total |
| ■ All Events     | 11,088  | ####    | 100.0  |
| ■ P1             | 10,000  | 90.2    | 90.2   |
| ⊠ P2             | 14      | 0.1     | 0.1    |

| LPS CD86 isotype |         |         |           |
|------------------|---------|---------|-----------|
| Population       | #Events | %Parent | PE-A Mean |
| ■ All Events     | 11,088  | ####    | 74        |
| ■ P1             | 10,000  | 90.2    | 73        |
| ⊠ P2             | 14      | 0.1     | 1,285     |

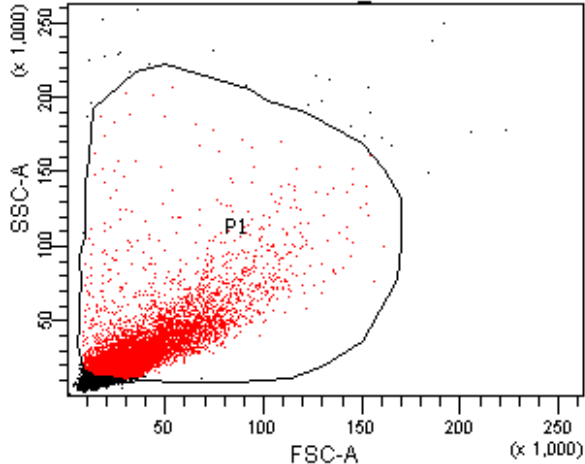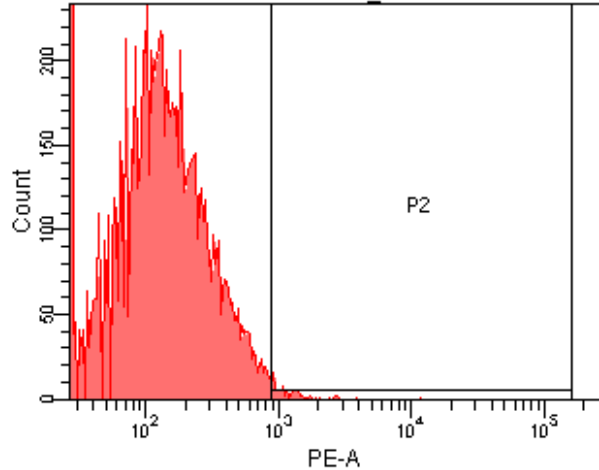

PS HSPs CD86

| Population | #Events | %Parent | %Total |
|------------|---------|---------|--------|
| All Events | 14,370  | ####    | 100.0  |
| P1         | 10,000  | 69.6    | 69.6   |
| P2         | 97      | 1.0     | 0.7    |

PS HSPs CD86

| Population | #Events | %Parent | PE-A Mean |
|------------|---------|---------|-----------|
| All Events | 14,370  | ####    | 148       |
| P1         | 10,000  | 69.6    | 179       |
| P2         | 97      | 1.0     | 1,336     |

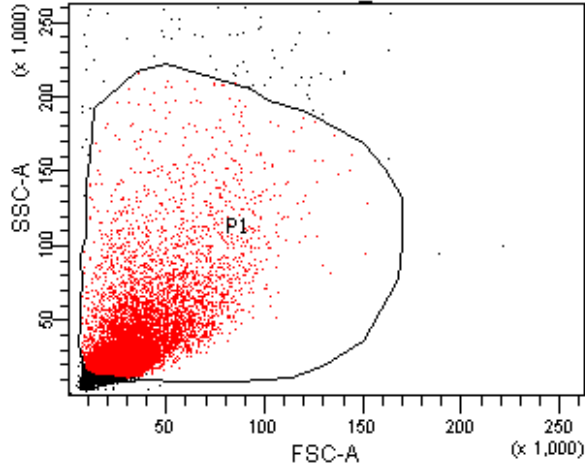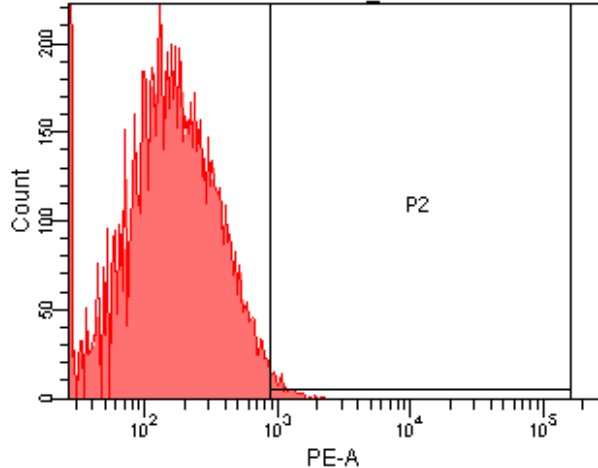

PS HSPs@glucan CD86

| Population | #Events | %Parent | %Total |
|------------|---------|---------|--------|
| All Events | 13,145  | ####    | 100.0  |
| P1         | 10,000  | 76.1    | 76.1   |
| P2         | 130     | 1.3     | 1.0    |

PS HSPs@glucan CD86

| Population | #Events | %Parent | PE-A Mean |
|------------|---------|---------|-----------|
| All Events | 13,145  | ####    | 188       |
| P1         | 10,000  | 76.1    | 214       |
| P2         | 130     | 1.3     | 1,139     |

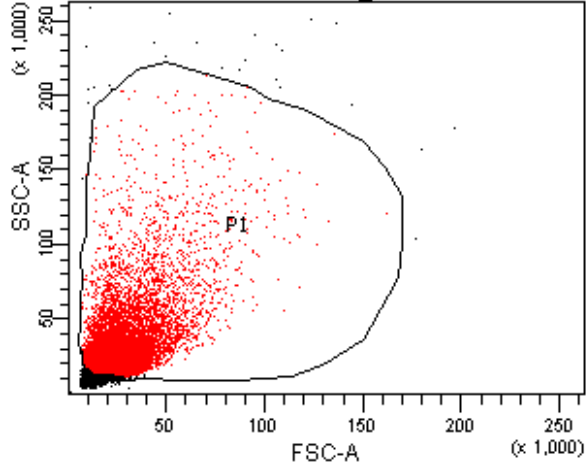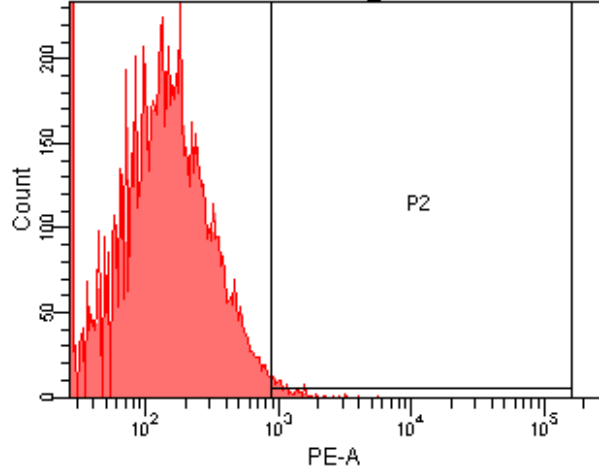

E. coli HSPs CD86

| Population | #Events | %Parent | %Total |
|------------|---------|---------|--------|
| All Events | 13,627  | ####    | 100.0  |
| P1         | 10,000  | 73.4    | 73.4   |
| P2         | 115     | 1.2     | 0.8    |

E. coli HSPs CD86

| Population | #Events | %Parent | PE-A Mean |
|------------|---------|---------|-----------|
| All Events | 13,627  | ####    | 158       |
| P1         | 10,000  | 73.4    | 186       |
| P2         | 115     | 1.2     | 1,285     |

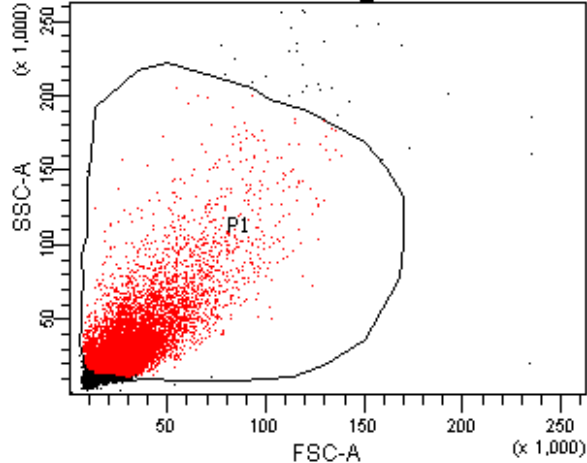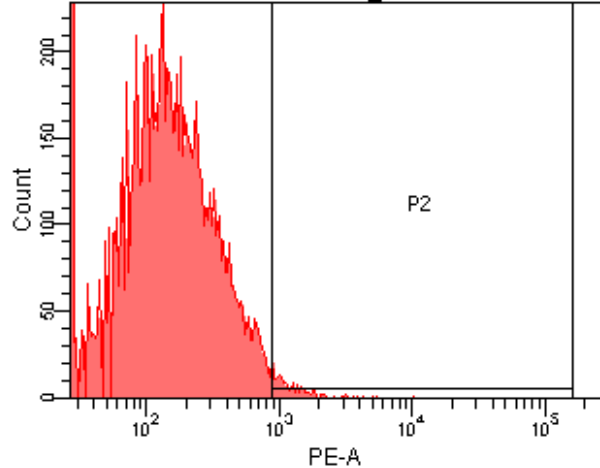

E. coli HSPs@glucan CD86

| Population | #Events | %Parent | %Total |
|------------|---------|---------|--------|
| All Events | 13,516  | ####    | 100.0  |
| P1         | 10,000  | 74.0    | 74.0   |
| P2         | 169     | 1.7     | 1.3    |

E. coli HSPs@glucan CD86

| Population | #Events | %Parent | PE-A Mean |
|------------|---------|---------|-----------|
| All Events | 13,516  | ####    | 174       |
| P1         | 10,000  | 74.0    | 205       |
| P2         | 169     | 1.7     | 1,400     |

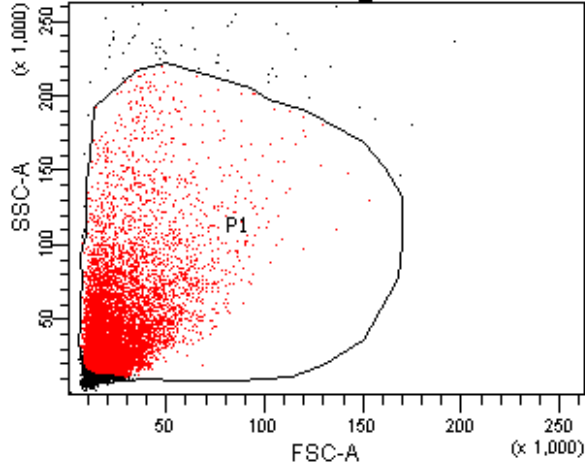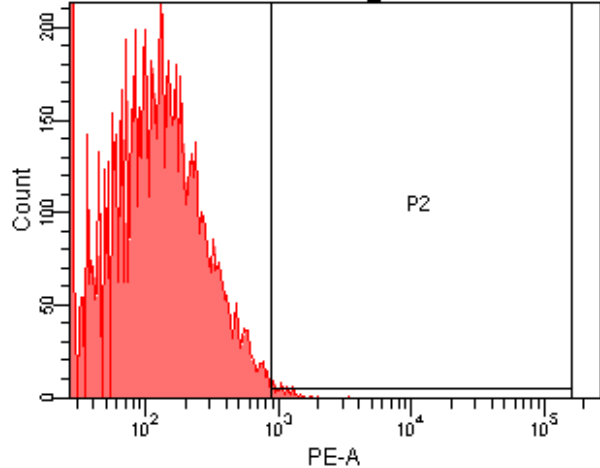

S. aureus HSPs CD86

| Population | #Events | %Parent | %Total |
|------------|---------|---------|--------|
| All Events | 12,179  | ####    | 100.0  |
| P1         | 10,000  | 82.1    | 82.1   |
| P2         | 72      | 0.7     | 0.6    |

S. aureus HSPs CD86

| Population | #Events | %Parent | PE-A Mean |
|------------|---------|---------|-----------|
| All Events | 12,179  | ####    | 146       |
| P1         | 10,000  | 82.1    | 155       |
| P2         | 72      | 0.7     | 1,149     |

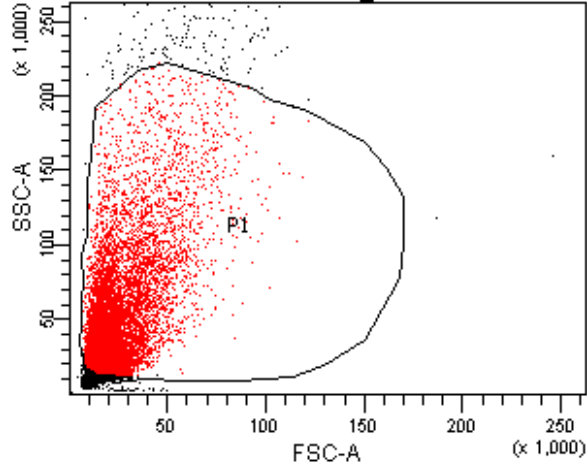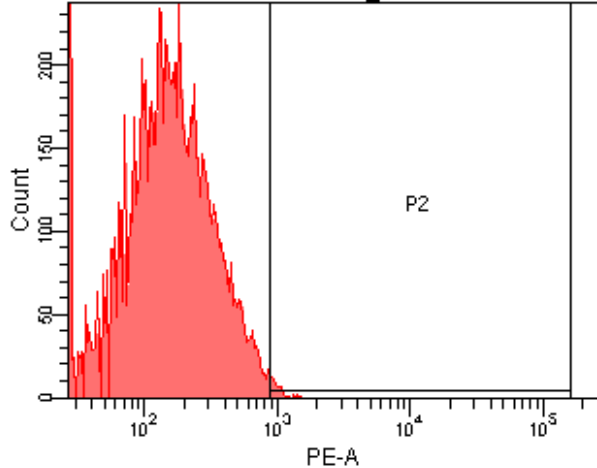

S. aureus HSPs@glucan CD86

| Population | #Events | %Parent | %Total |
|------------|---------|---------|--------|
| All Events | 12,135  | ####    | 100.0  |
| P1         | 10,000  | 82.4    | 82.4   |
| P2         | 67      | 0.7     | 0.6    |

S. aureus HSPs@glucan CD86

| Population | #Events | %Parent | PE-A Mean |
|------------|---------|---------|-----------|
| All Events | 12,135  | ####    | 195       |
| P1         | 10,000  | 82.4    | 195       |
| P2         | 67      | 0.7     | 1,008     |

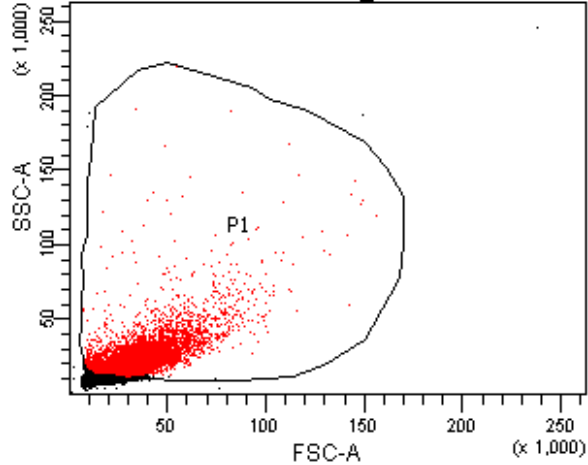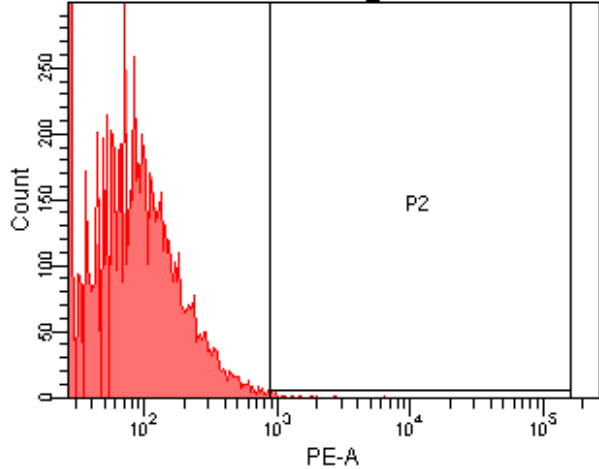

| PBS CD86   |         |         |        |
|------------|---------|---------|--------|
| Population | #Events | %Parent | %Total |
| All Events | 28,299  | ####    | 100.0  |
| P1         | 10,000  | 35.3    | 35.3   |
| P2         | 23      | 0.2     | 0.1    |

| PBS CD86   |         |         |           |
|------------|---------|---------|-----------|
| Population | #Events | %Parent | PE-A Mean |
| All Events | 28,299  | ####    | 65        |
| P1         | 10,000  | 35.3    | 100       |
| P2         | 23      | 0.2     | 1,473     |



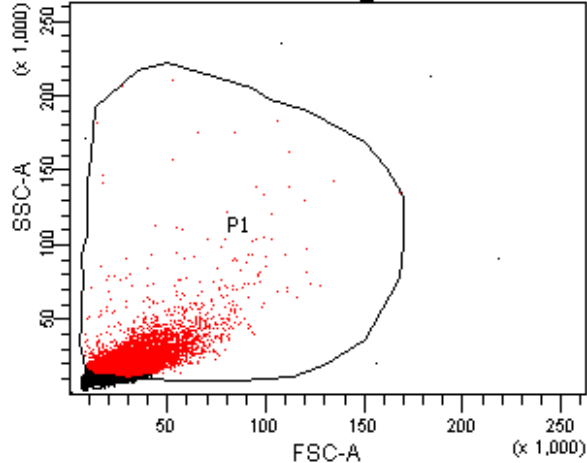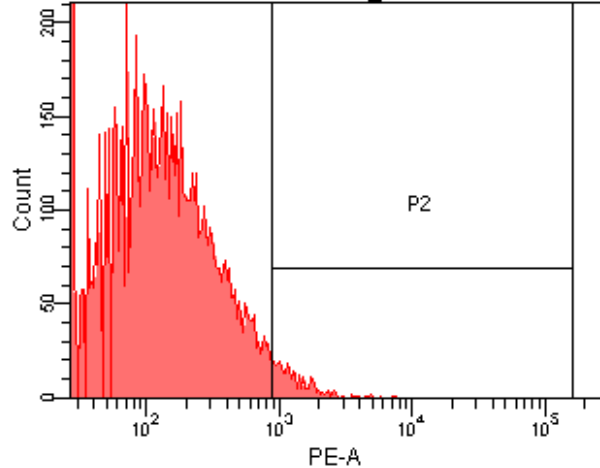

### LPS CD86

| Population | #Events | %Parent | %Total |
|------------|---------|---------|--------|
| All Events | 22,081  | ####    | 100.0  |
| P1         | 10,000  | 45.3    | 45.3   |
| P2         | 304     | 3.0     | 1.4    |

### LPS CD86

| Population | #Events | %Parent | PE-A Mean |
|------------|---------|---------|-----------|
| All Events | 22,081  | ####    | 122       |
| P1         | 10,000  | 45.3    | 200       |
| P2         | 304     | 3.0     | 1,479     |
