# Supplementary material for: Antigen uptake and immunoadjuvant activity of pathogen-mimetic hollow silica particles conjugated with β-glucan
Source: Royal Society of Chemistry journal article supplement (doi:10.1039/c8tb02129e), 2018-01-01
Supplement: c8tb02129e3.pdf [file c8tb02129e3.pdf]

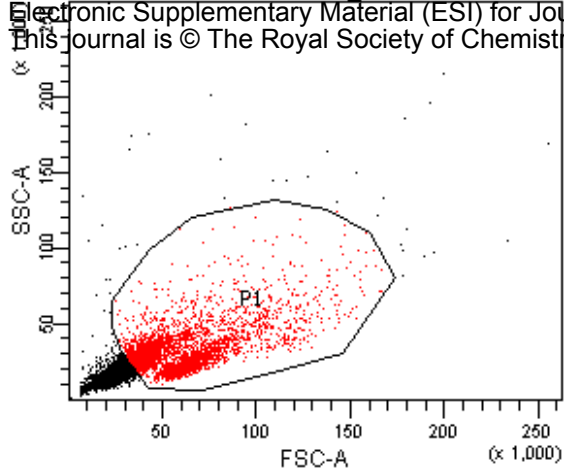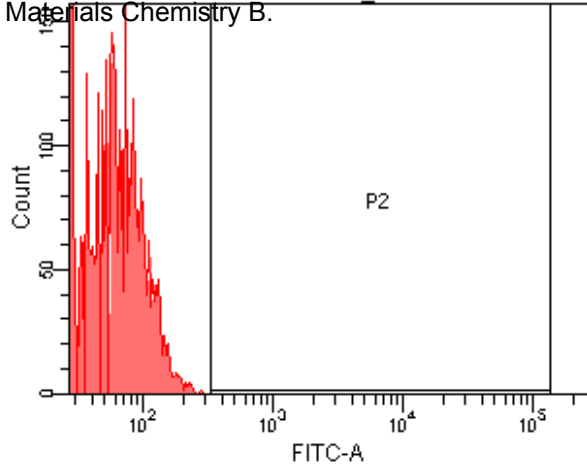

Blank

| Population   | #Events | %Parent | %Total |
|--------------|---------|---------|--------|
| ■ All Events | 10,000  | ####    | 100.0  |
| ■ P1         | 4,395   | 44.0    | 44.0   |
| ☒ P2         | 0       | 0.0     | 0.0    |

Blank

| Population   | #Events | %Parent | FITC-A Mean |
|--------------|---------|---------|-------------|
| ■ All Events | 10,000  | ####    | 39          |
| ■ P1         | 4,395   | 44.0    | 53          |
| ☒ P2         | 0       | 0.0     | ####        |

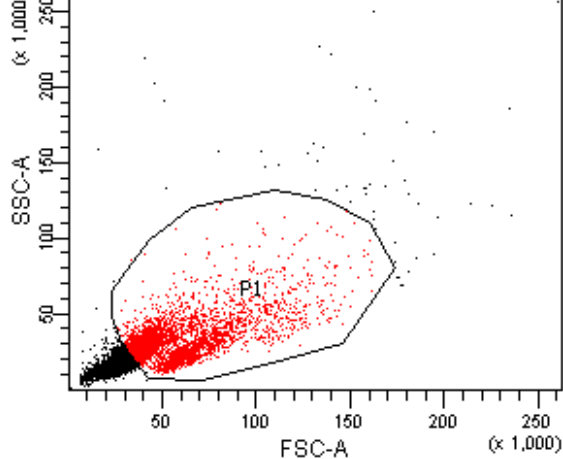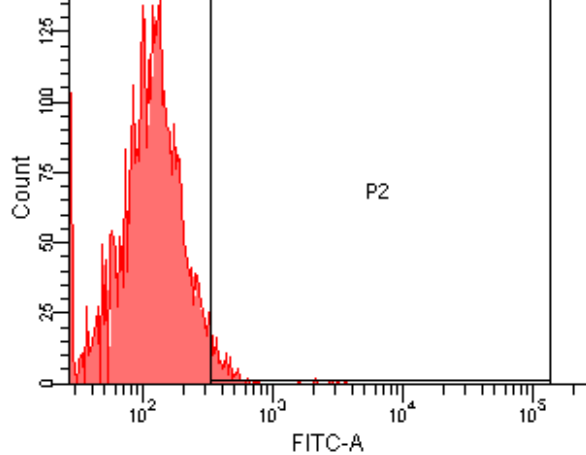

### FITC-OVA 0.5h

| Population | #Events | %Parent | %Total |
|------------|---------|---------|--------|
| All Events | 10,000  | ####    | 100.0  |
| P1         | 4,033   | 40.3    | 40.3   |
| P2         | 121     | 3.0     | 1.2    |

### FITC-OVA 0.5h

| Population | #Events | %Parent | FITC-A Mean |
|------------|---------|---------|-------------|
| All Events | 10,000  | ####    | 95          |
| P1         | 4,033   | 40.3    | 135         |
| P2         | 121     | 3.0     | 513         |

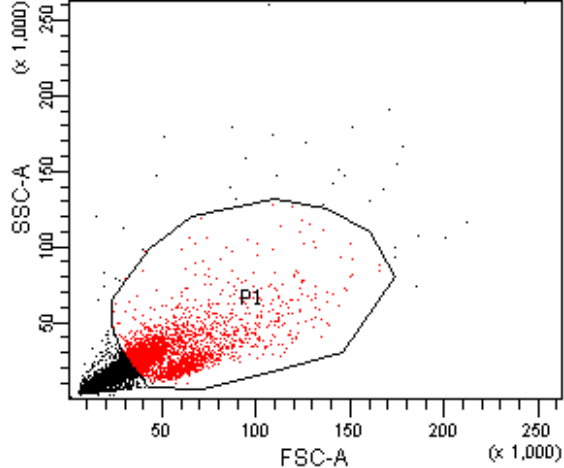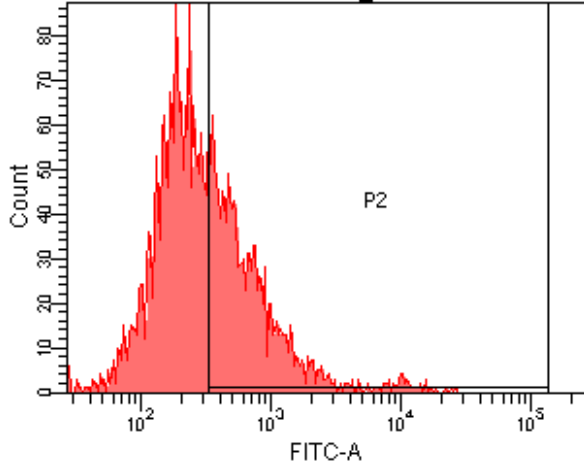

PS HSPs 0.5h

| Population   | #Events | %Parent | %Total |
|--------------|---------|---------|--------|
| ■ All Events | 10,000  | ####    | 100.0  |
| ■ P1         | 3,303   | 33.0    | 33.0   |
| ⊠ P2         | 1,403   | 42.5    | 14.0   |

PS HSPs 0.5h

| Population   | #Events | %Parent | FITC-A Mean |
|--------------|---------|---------|-------------|
| ■ All Events | 10,000  | ####    | 559         |
| ■ P1         | 3,303   | 33.0    | 601         |
| ⊠ P2         | 1,403   | 42.5    | 1,163       |

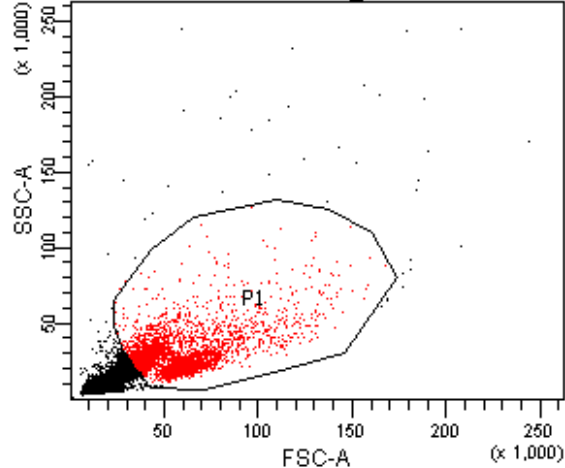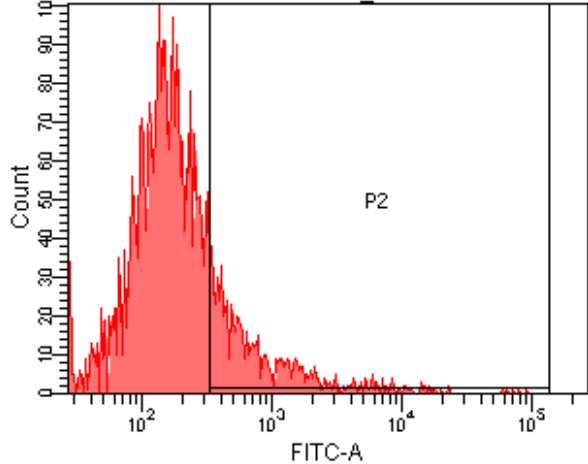

PS HSPs@glucan 0.5h

| Population   | #Events | %Parent | %Total |
|--------------|---------|---------|--------|
| ■ All Events | 10,000  | ####    | 100.0  |
| ■ P1         | 3,623   | 36.2    | 36.2   |
| ⊠ P2         | 770     | 21.3    | 7.7    |

PS HSPs@glucan 0.5h

| Population   | #Events | %Parent | FITC-A Mean |
|--------------|---------|---------|-------------|
| ■ All Events | 10,000  | ####    | 1,204       |
| ■ P1         | 3,623   | 36.2    | 535         |
| ⊠ P2         | 770     | 21.3    | 1,957       |

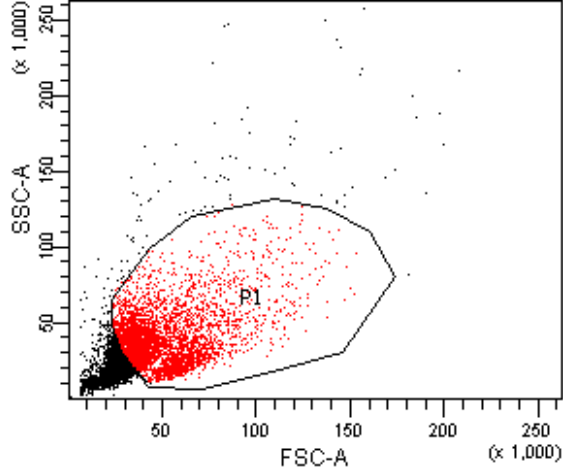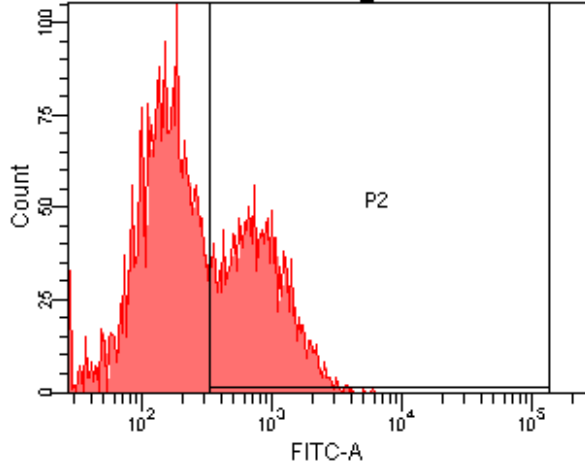

E. coli HSPs 0.5h

| Population | #Events | %Parent | %Total |
|------------|---------|---------|--------|
| All Events | 10,000  | ####    | 100.0  |
| P1         | 4,494   | 44.9    | 44.9   |
| P2         | 1,781   | 39.6    | 17.8   |

E. coli HSPs 0.5h

| Population | #Events | %Parent | FITC-A Mean |
|------------|---------|---------|-------------|
| All Events | 10,000  | ####    | 327         |
| P1         | 4,494   | 44.9    | 448         |
| P2         | 1,781   | 39.6    | 897         |

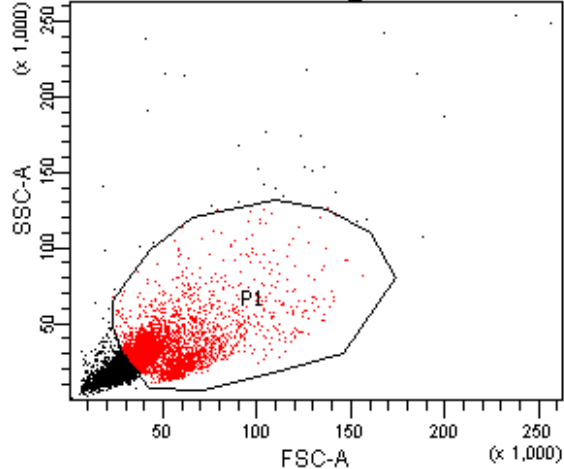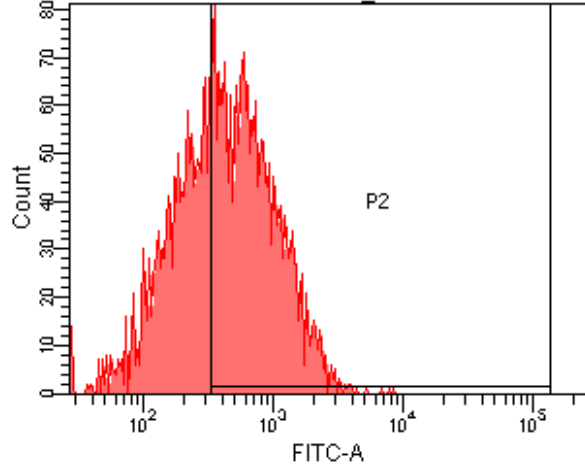

E. coli HSPs@glucan 0.5h

| Population   | #Events | %Parent | %Total |
|--------------|---------|---------|--------|
| ■ All Events | 10,000  | ####    | 100.0  |
| ■ P1         | 3,873   | 38.7    | 38.7   |
| ⊠ P2         | 2,351   | 60.7    | 23.5   |

E. coli HSPs@glucan 0.5h

| Population   | #Events | %Parent | FITC-A Mean |
|--------------|---------|---------|-------------|
| ■ All Events | 10,000  | ####    | 406         |
| ■ P1         | 3,873   | 38.7    | 580         |
| ⊠ P2         | 2,351   | 60.7    | 832         |

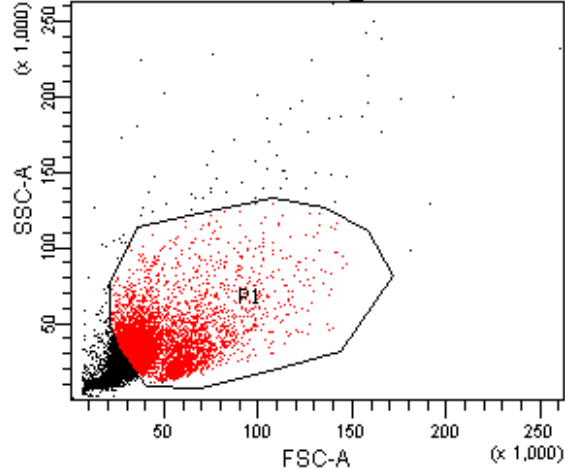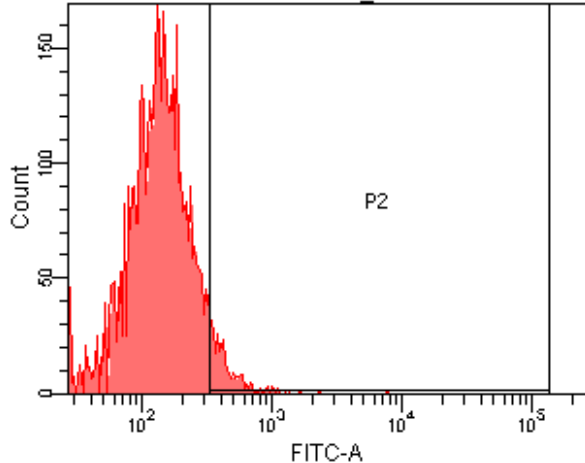

*S. aureus* HSPs 0.5h

| Population | #Events | %Parent | %Total |
|------------|---------|---------|--------|
| All Events | 10,000  | ####    | 100.0  |
| P1         | 4,886   | 48.9    | 48.9   |
| P2         | 287     | 5.9     | 2.9    |

*S. aureus* HSPs 0.5h

| Population | #Events | %Parent | FITC-A Mean |
|------------|---------|---------|-------------|
| All Events | 10,000  | ####    | 124         |
| P1         | 4,886   | 48.9    | 161         |
| P2         | 287     | 5.9     | 485         |

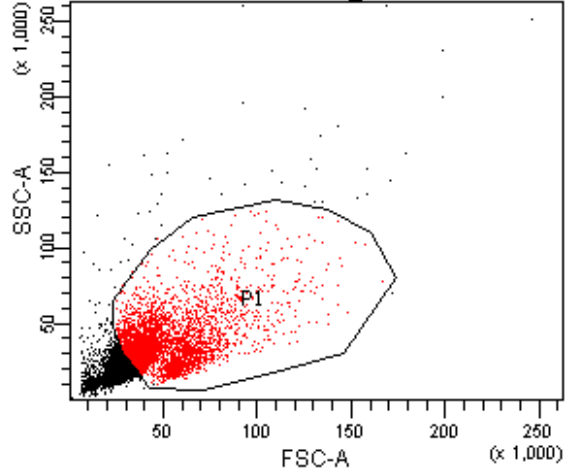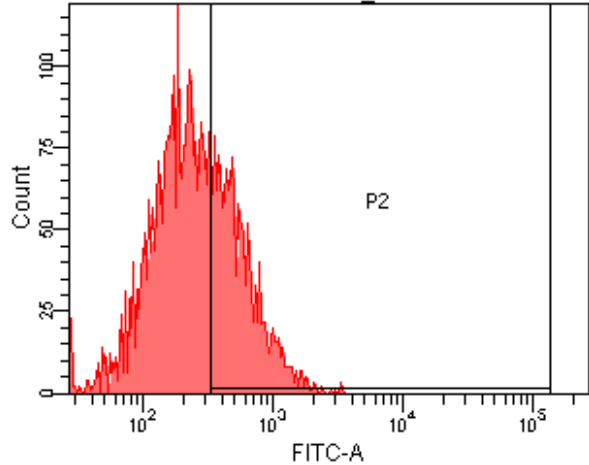

S. aureus HSPs@glucan 0.5h

| Population   | #Events | %Parent | %Total |
|--------------|---------|---------|--------|
| ■ All Events | 10,000  | ####    | 100.0  |
| ■ P1         | 4,365   | 43.6    | 43.6   |
| ⊠ P2         | 1,586   | 36.3    | 15.9   |

S. aureus HSPs@glucan 0.5h

| Population   | #Events | %Parent | FITC-A Mean |
|--------------|---------|---------|-------------|
| ■ All Events | 10,000  | ####    | 246         |
| ■ P1         | 4,365   | 43.6    | 334         |
| ⊠ P2         | 1,586   | 36.3    | 610         |



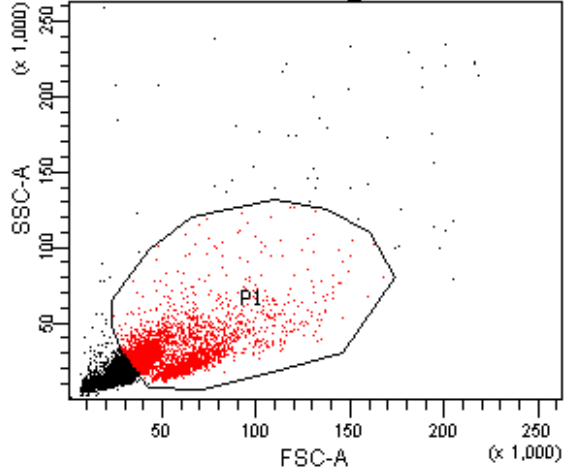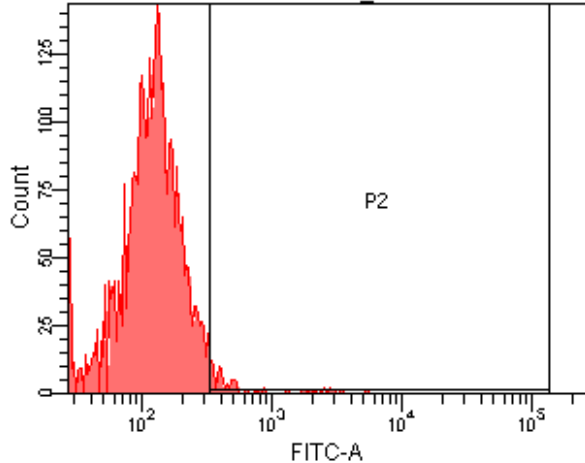

### FITC-OVA 1h

| Population   | #Events | %Parent | %Total |
|--------------|---------|---------|--------|
| ■ All Events | 10,000  | ####    | 100.0  |
| ■ P1         | 3,656   | 36.6    | 36.6   |
| ⊠ P2         | 107     | 2.9     | 1.1    |

### FITC-OVA 1h

| Population   | #Events | %Parent | FITC-A Mean |
|--------------|---------|---------|-------------|
| ■ All Events | 10,000  | ####    | 102         |
| ■ P1         | 3,656   | 36.6    | 147         |
| ⊠ P2         | 107     | 2.9     | 806         |

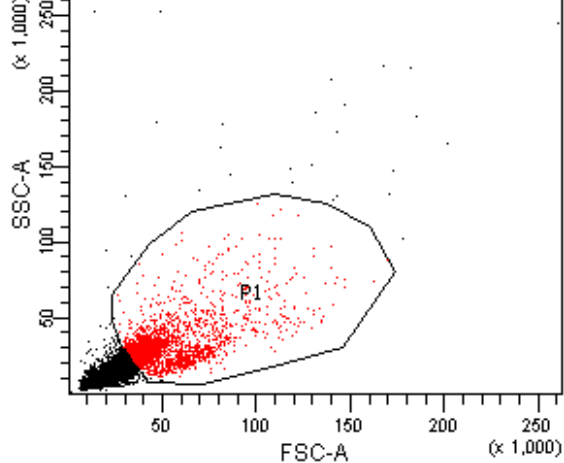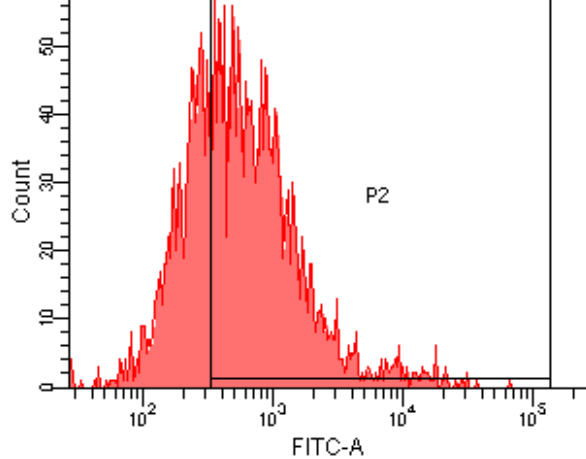

### PS HSPs 1h

| Population | #Events | %Parent | %Total |
|------------|---------|---------|--------|
| All Events | 10,000  | ####    | 100.0  |
| P1         | 2,943   | 29.4    | 29.4   |
| P2         | 2,010   | 68.3    | 20.1   |

### PS HSPs 1h

| Population | #Events | %Parent | FITC-A Mean |
|------------|---------|---------|-------------|
| All Events | 10,000  | ####    | 833         |
| P1         | 2,943   | 29.4    | 1,094       |
| P2         | 2,010   | 68.3    | 1,504       |

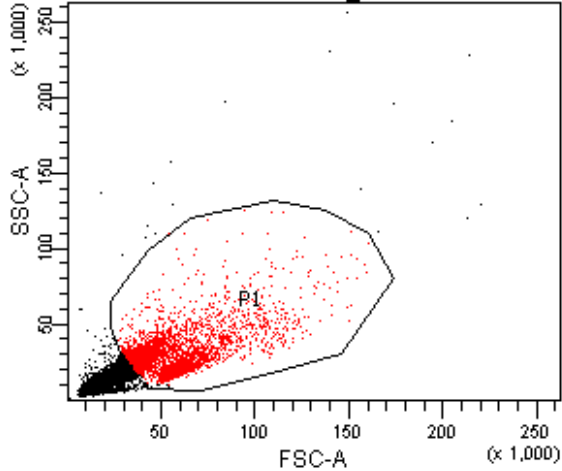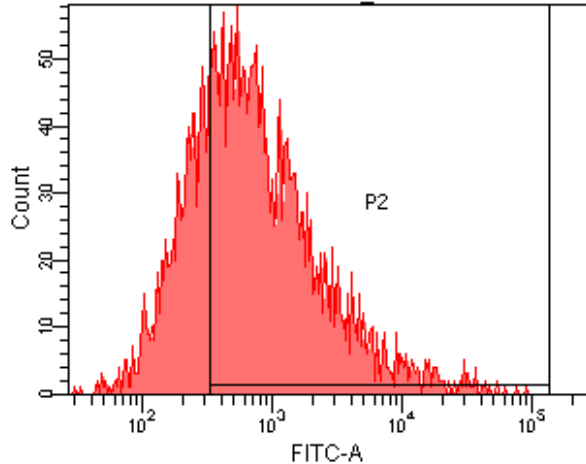

PS HSPs@glucan 1h

| Population   | #Events | %Parent | %Total |
|--------------|---------|---------|--------|
| ■ All Events | 10,000  | ####    | 100.0  |
| ■ P1         | 3,500   | 35.0    | 35.0   |
| ⊠ P2         | 2,565   | 73.3    | 25.7   |

PS HSPs@glucan 1h

| Population   | #Events | %Parent | FITC-A Mean |
|--------------|---------|---------|-------------|
| ■ All Events | 10,000  | ####    | 1,990       |
| ■ P1         | 3,500   | 35.0    | 1,698       |
| ⊠ P2         | 2,565   | 73.3    | 2,240       |

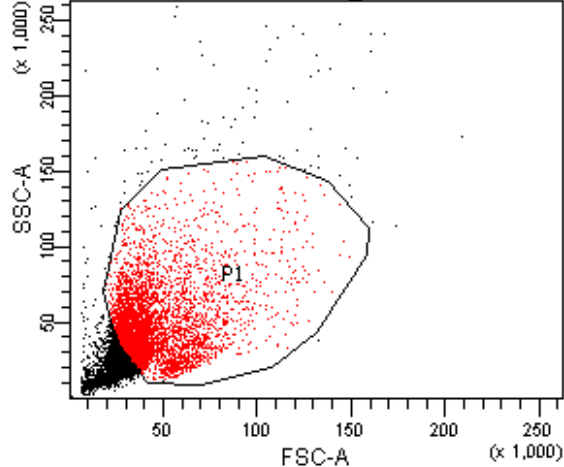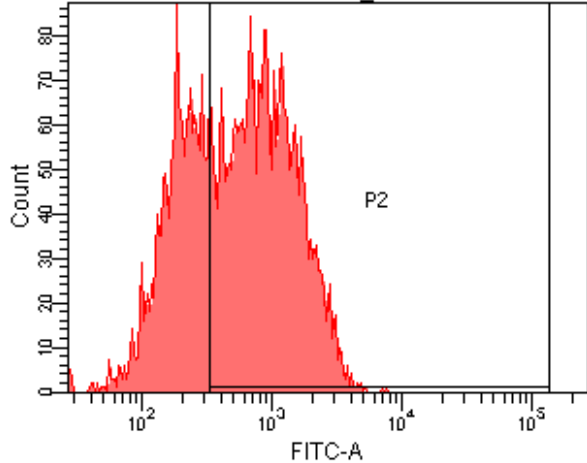

E.coli HSPs 1h

| Population | #Events | %Parent | %Total |
|------------|---------|---------|--------|
| All Events | 10,000  | ####    | 100.0  |
| P1         | 4,999   | 50.0    | 50.0   |
| P2         | 3,252   | 65.1    | 32.5   |

E.coli HSPs 1h

| Population | #Events | %Parent | FITC-A Mean |
|------------|---------|---------|-------------|
| All Events | 10,000  | ####    | 553         |
| P1         | 4,999   | 50.0    | 765         |
| P2         | 3,252   | 65.1    | 1,071       |

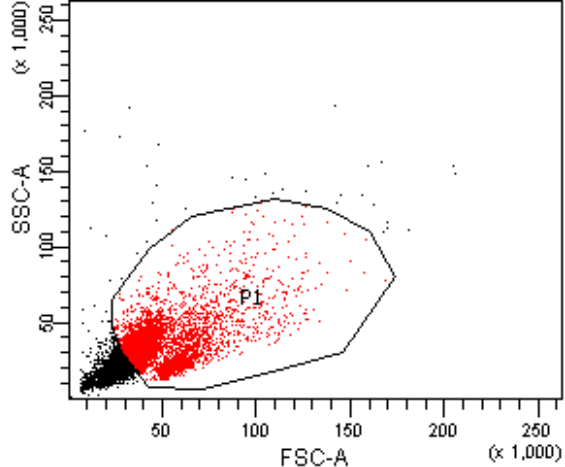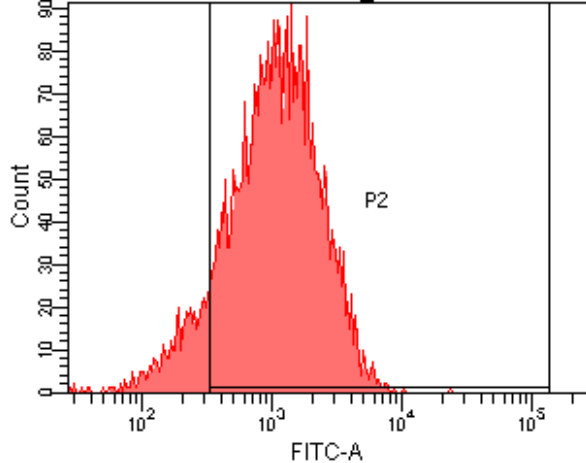

E.coli HSPs@glucan 1h

| Population   | #Events | %Parent | %Total |
|--------------|---------|---------|--------|
| ■ All Events | 10,000  | ####    | 100.0  |
| ■ P1         | 4,410   | 44.1    | 44.1   |
| ⊠ P2         | 3,952   | 89.6    | 39.5   |

E.coli HSPs@glucan 1h

| Population   | #Events | %Parent | FITC-A Mean |
|--------------|---------|---------|-------------|
| ■ All Events | 10,000  | ####    | 903         |
| ■ P1         | 4,410   | 44.1    | 1,320       |
| ⊠ P2         | 3,952   | 89.6    | 1,449       |

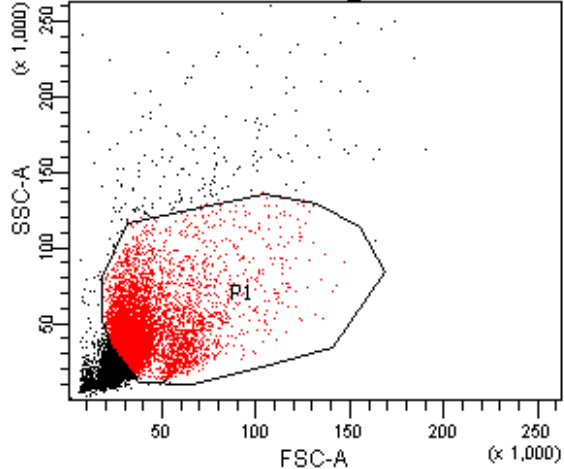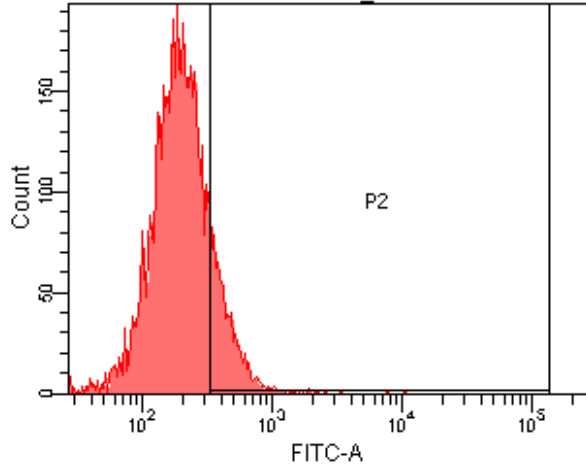

S. aureus HSPs 1h

| Population   | #Events | %Parent | %Total |
|--------------|---------|---------|--------|
| ■ All Events | 10,000  | ####    | 100.0  |
| ■ P1         | 5,619   | 56.2    | 56.2   |
| ⊠ P2         | 878     | 15.6    | 8.8    |

S. aureus HSPs 1h

| Population   | #Events | %Parent | FITC-A Mean |
|--------------|---------|---------|-------------|
| ■ All Events | 10,000  | ####    | 196         |
| ■ P1         | 5,619   | 56.2    | 229         |
| ⊠ P2         | 878     | 15.6    | 488         |

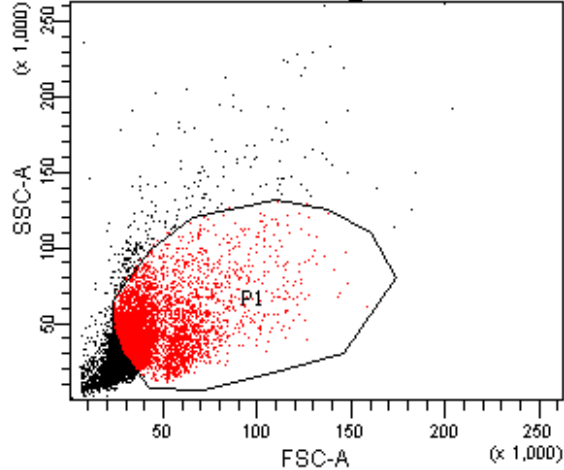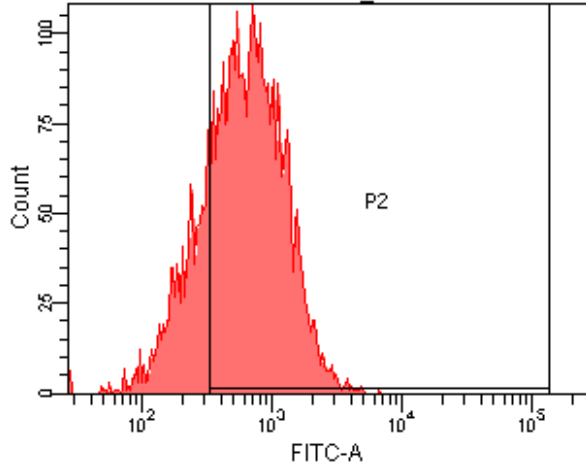

S. aureus HSPs@glucan 1h

| Population   | #Events | %Parent | %Total |
|--------------|---------|---------|--------|
| ■ All Events | 10,000  | ####    | 100.0  |
| ■ P1         | 4,904   | 49.0    | 49.0   |
| ☒ P2         | 3,836   | 78.2    | 38.4   |

S. aureus HSPs@glucan 1h

| Population   | #Events | %Parent | FITC-A Mean |
|--------------|---------|---------|-------------|
| ■ All Events | 10,000  | ####    | 558         |
| ■ P1         | 4,904   | 49.0    | 726         |
| ☒ P2         | 3,836   | 78.2    | 868         |

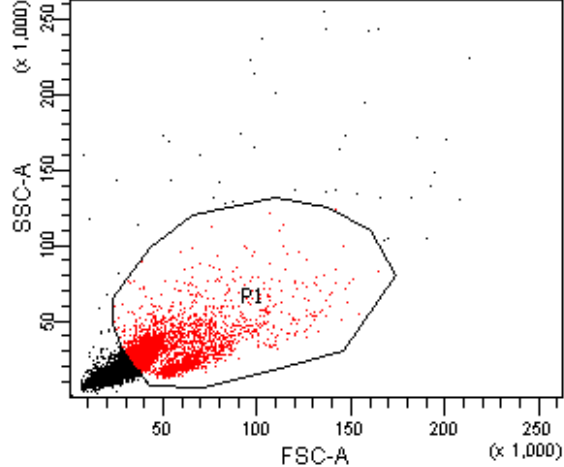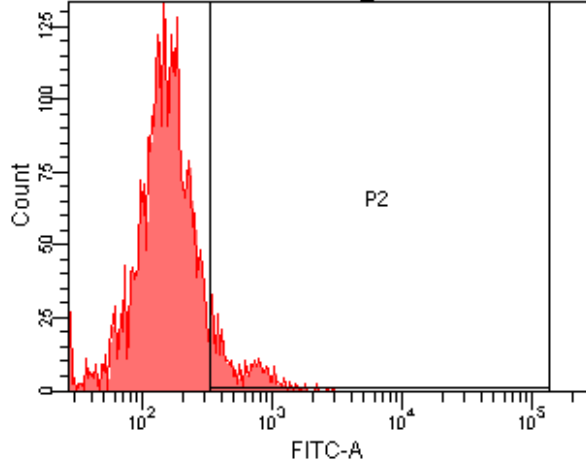

### FITC-OVA 2h

| Population   | #Events | %Parent | %Total |
|--------------|---------|---------|--------|
| ■ All Events | 10,000  | ####    | 100.0  |
| ■ P1         | 3,592   | 35.9    | 35.9   |
| ⊠ P2         | 353     | 9.8     | 3.5    |

### FITC-OVA 2h

| Population   | #Events | %Parent | FITC-A Mean |
|--------------|---------|---------|-------------|
| ■ All Events | 10,000  | ####    | 129         |
| ■ P1         | 3,592   | 35.9    | 197         |
| ⊠ P2         | 353     | 9.8     | 614         |



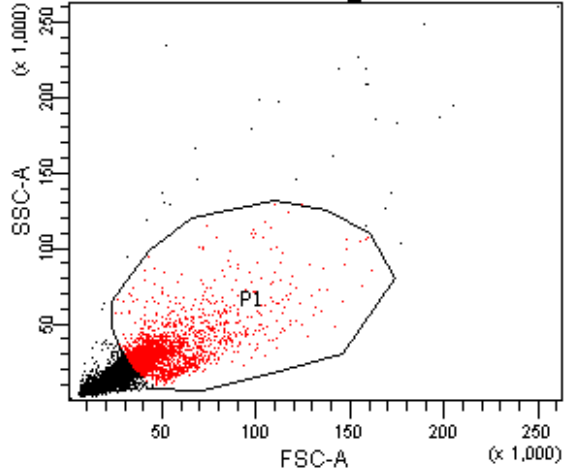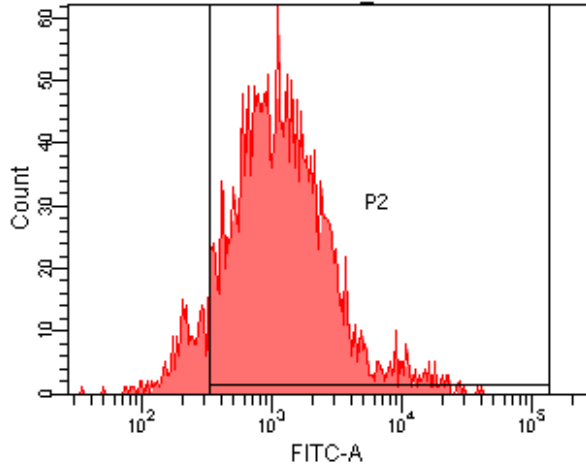

PS HSPs 2h

| Population | #Events | %Parent | %Total |
|------------|---------|---------|--------|
| All Events | 10,000  | ####    | 100.0  |
| P1         | 2,769   | 27.7    | 27.7   |
| P2         | 2,540   | 91.7    | 25.4   |

PS HSPs 2h

| Population | #Events | %Parent | FITC-A Mean |
|------------|---------|---------|-------------|
| All Events | 10,000  | ####    | 1,230       |
| P1         | 2,769   | 27.7    | 1,849       |
| P2         | 2,540   | 91.7    | 1,996       |

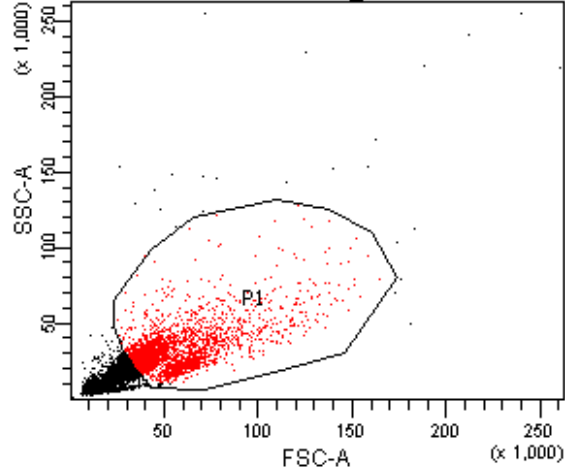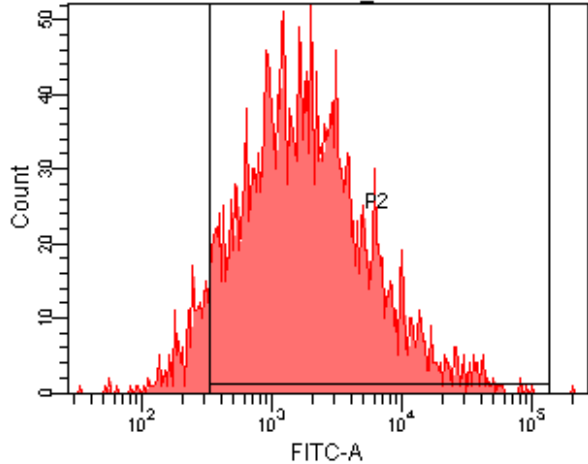

PS HSPs@glucan 2h

| Population   | #Events | %Parent | %Total |
|--------------|---------|---------|--------|
| ■ All Events | 10,000  | ####    | 100.0  |
| ■ P1         | 3,089   | 30.9    | 30.9   |
| ☒ P2         | 2,886   | 93.4    | 28.9   |

PS HSPs@glucan 2h

| Population   | #Events | %Parent | FITC-A Mean |
|--------------|---------|---------|-------------|
| ■ All Events | 10,000  | ####    | 2,846       |
| ■ P1         | 3,089   | 30.9    | 3,602       |
| ☒ P2         | 2,886   | 93.4    | 3,766       |

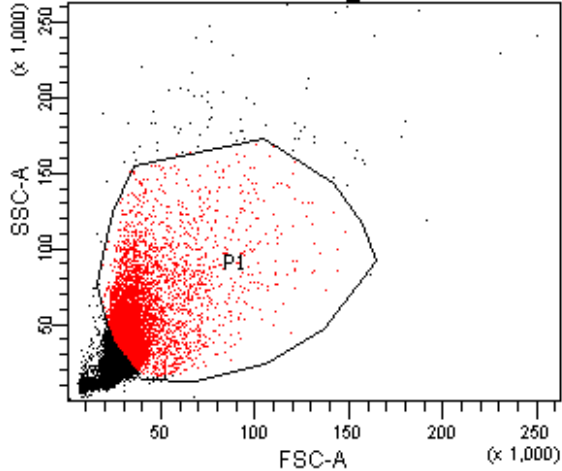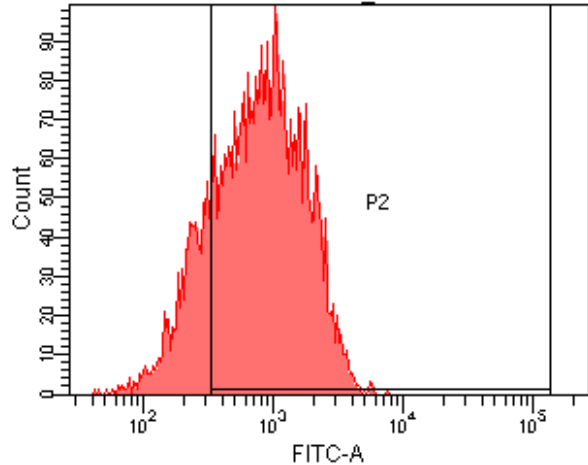

E. coli HSPs 2h

| Population   | #Events | %Parent | %Total |
|--------------|---------|---------|--------|
| ■ All Events | 10,000  | ####    | 100.0  |
| ■ P1         | 4,776   | 47.8    | 47.8   |
| ⊠ P2         | 3,903   | 81.7    | 39.0   |

E. coli HSPs 2h

| Population   | #Events | %Parent | FITC-A Mean |
|--------------|---------|---------|-------------|
| ■ All Events | 10,000  | ####    | 651         |
| ■ P1         | 4,776   | 47.8    | 972         |
| ⊠ P2         | 3,903   | 81.7    | 1,140       |

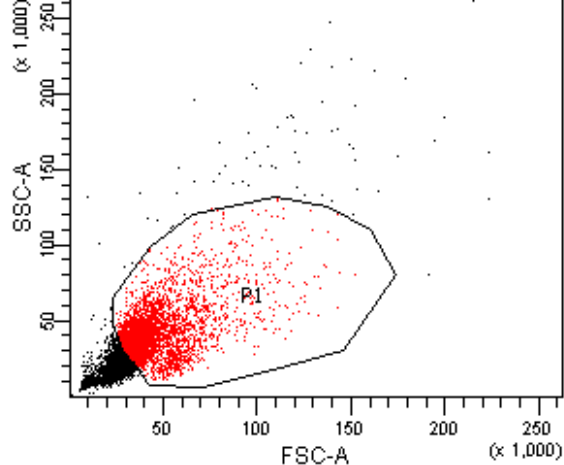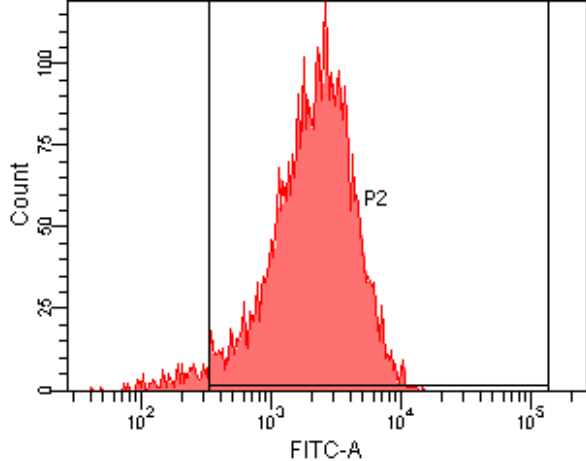

E.coli HSPs@glucan 2h

| Population   | #Events | %Parent | %Total |
|--------------|---------|---------|--------|
| ■ All Events | 10,000  | ####    | 100.0  |
| ■ P1         | 4,615   | 46.2    | 46.2   |
| ☒ P2         | 4,473   | 96.9    | 44.7   |

E. coli HSPs@glucan 2h

| Population   | #Events | %Parent | FITC-A Mean |
|--------------|---------|---------|-------------|
| ■ All Events | 10,000  | ####    | 1,694       |
| ■ P1         | 4,615   | 46.2    | 2,521       |
| ☒ P2         | 4,473   | 96.9    | 2,595       |

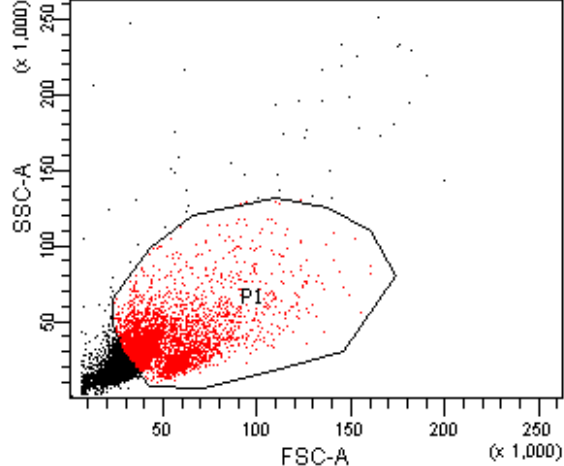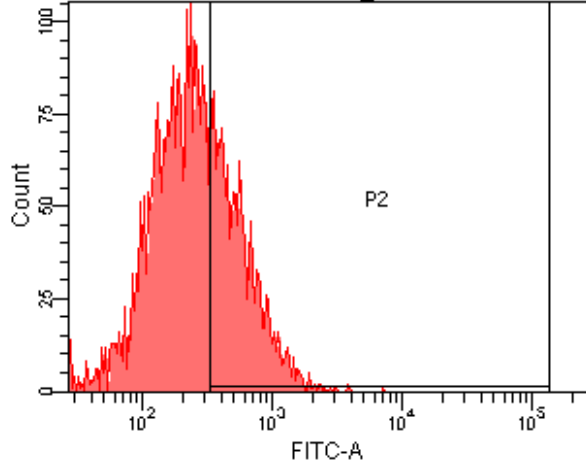

S. aureus HSPs 2h

| Population   | #Events | %Parent | %Total |
|--------------|---------|---------|--------|
| ■ All Events | 10,000  | ####    | 100.0  |
| ■ P1         | 4,296   | 43.0    | 43.0   |
| ☒ P2         | 1,524   | 35.5    | 15.2   |

S. aureus HSPs 2h

| Population   | #Events | %Parent | FITC-A Mean |
|--------------|---------|---------|-------------|
| ■ All Events | 10,000  | ####    | 242         |
| ■ P1         | 4,296   | 43.0    | 333         |
| ☒ P2         | 1,524   | 35.5    | 614         |

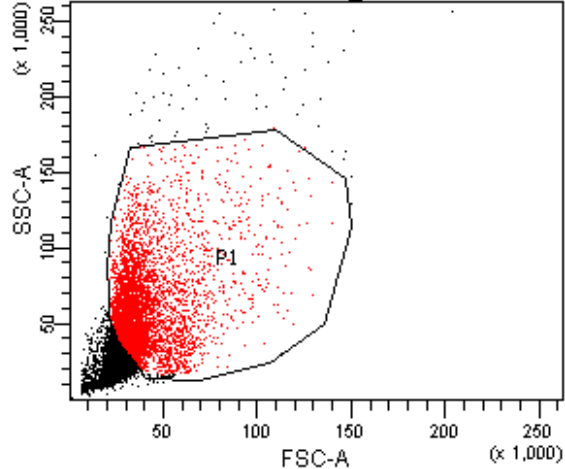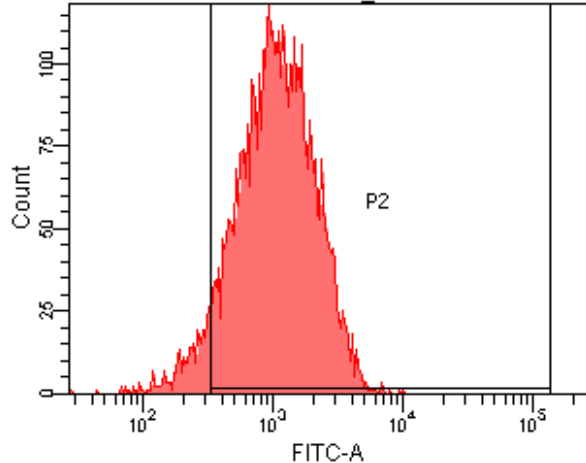

S. aureus HSPs@glucan 2h

| Population | #Events | %Parent | %Total |
|------------|---------|---------|--------|
| All Events | 10,000  | ####    | 100.0  |
| P1         | 5,091   | 50.9    | 50.9   |
| P2         | 4,784   | 94.0    | 47.8   |

S. aureus HSPs@glucan 2h

| Population | #Events | %Parent | FITC-A Mean |
|------------|---------|---------|-------------|
| All Events | 10,000  | ####    | 876         |
| P1         | 5,091   | 50.9    | 1,257       |
| P2         | 4,784   | 94.0    | 1,323       |

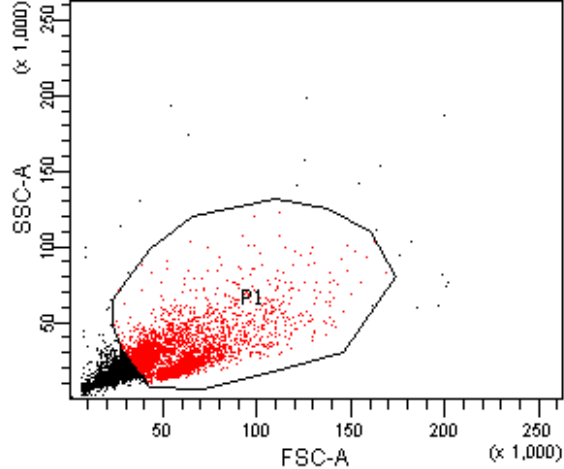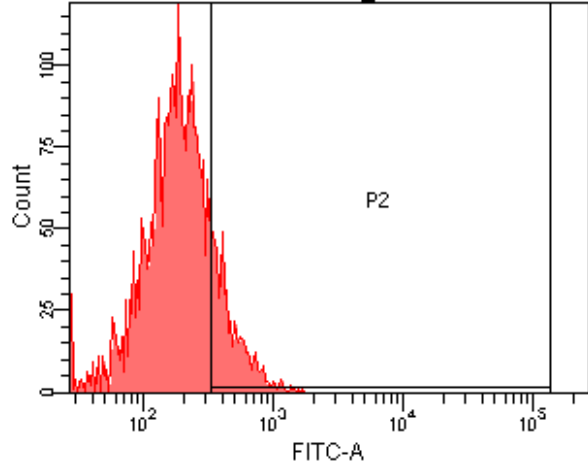

#### FITC-OVA 4h

| Population   | #Events | %Parent | %Total |
|--------------|---------|---------|--------|
| ■ All Events | 10,000  | ####    | 100.0  |
| ■ P1         | 3,512   | 35.1    | 35.1   |
| ⊠ P2         | 595     | 16.9    | 5.9    |

#### FITC-OVA 4h

| Population   | #Events | %Parent | FITC-A Mean |
|--------------|---------|---------|-------------|
| ■ All Events | 10,000  | ####    | 152         |
| ■ P1         | 3,512   | 35.1    | 225         |
| ⊠ P2         | 595     | 16.9    | 493         |

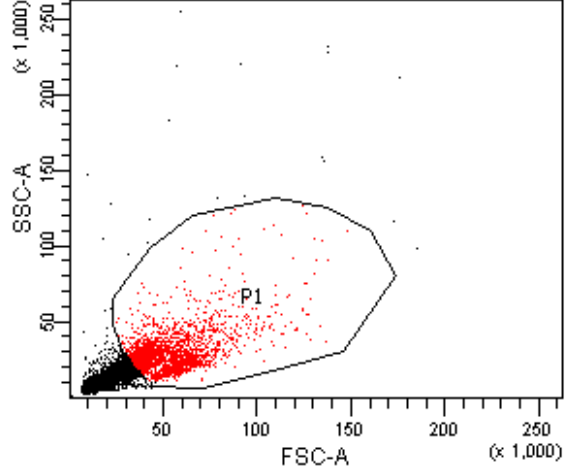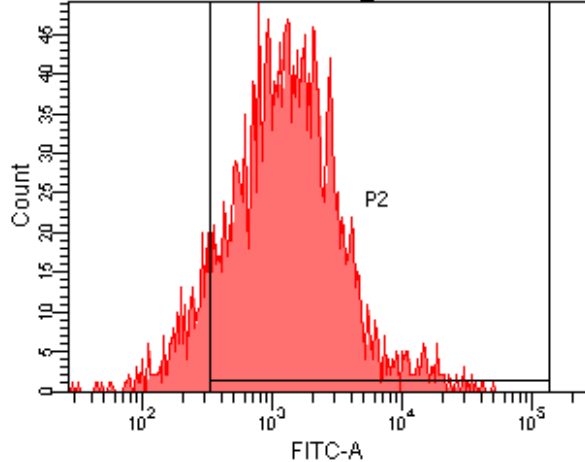

PS HSPs 4h

| Population   | #Events | %Parent | %Total |
|--------------|---------|---------|--------|
| ■ All Events | 10,000  | ####    | 100.0  |
| ■ P1         | 2,705   | 27.0    | 27.0   |
| ☒ P2         | 2,437   | 90.1    | 24.4   |

PS HSPs 4h

| Population   | #Events | %Parent | FITC-A Mean |
|--------------|---------|---------|-------------|
| ■ All Events | 10,000  | ####    | 1,240       |
| ■ P1         | 2,705   | 27.0    | 2,111       |
| ☒ P2         | 2,437   | 90.1    | 2,319       |



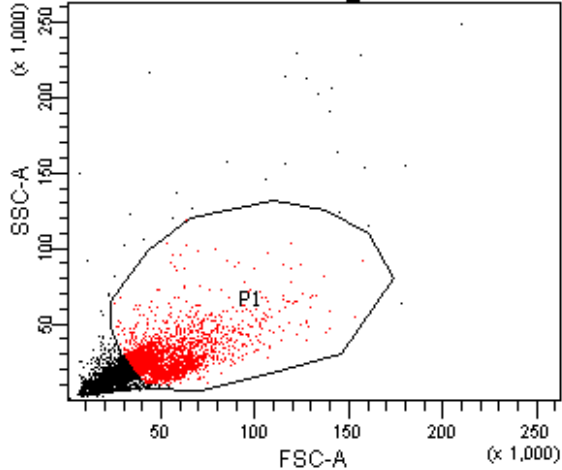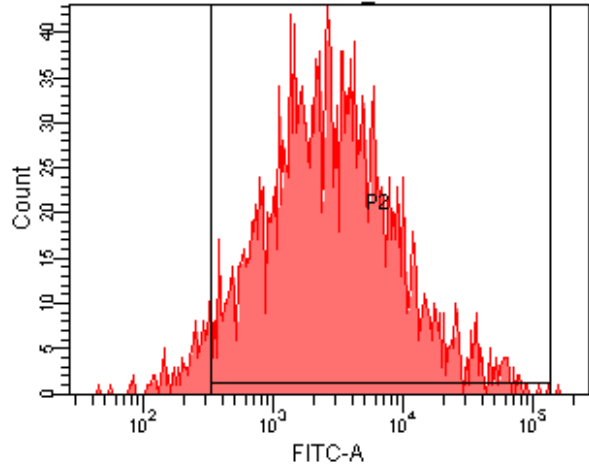

PS HSPs@glucan 4h

| Population   | #Events | %Parent | %Total |
|--------------|---------|---------|--------|
| ■ All Events | 10,000  | ####    | 100.0  |
| ■ P1         | 2,668   | 26.7    | 26.7   |
| ⊠ P2         | 2,549   | 95.5    | 25.5   |

PS HSPs@glucan 4h

| Population   | #Events | %Parent | FITC-A Mean |
|--------------|---------|---------|-------------|
| ■ All Events | 10,000  | ####    | 4,236       |
| ■ P1         | 2,668   | 26.7    | 5,661       |
| ⊠ P2         | 2,549   | 95.5    | 5,855       |

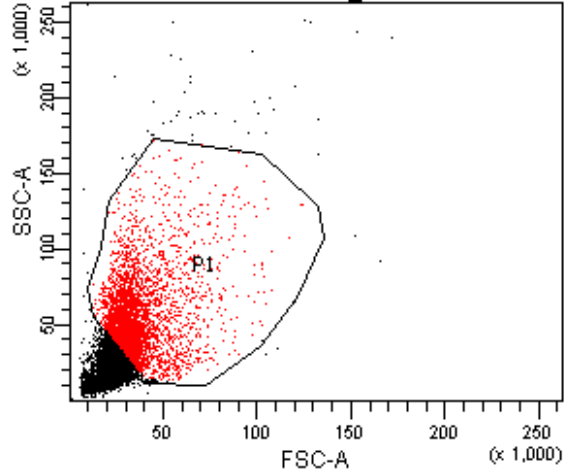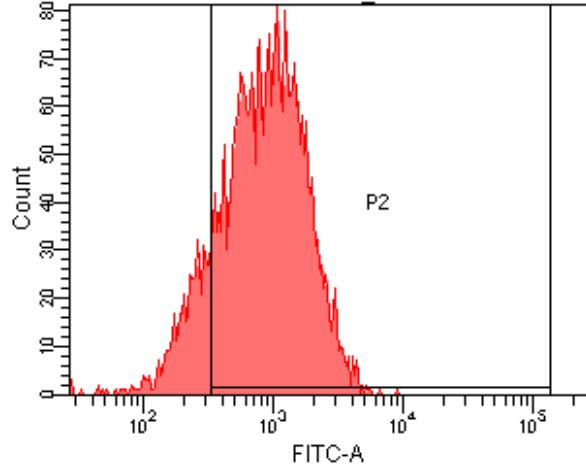

E. coli HSPs 4h

| Population | #Events | %Parent | %Total |
|------------|---------|---------|--------|
| All Events | 10,000  | ####    | 100.0  |
| P1         | 3,744   | 37.4    | 37.4   |
| P2         | 3,226   | 86.2    | 32.3   |

E. coli HSPs 4h

| Population | #Events | %Parent | FITC-A Mean |
|------------|---------|---------|-------------|
| All Events | 10,000  | ####    | 658         |
| P1         | 3,744   | 37.4    | 1,024       |
| P2         | 3,226   | 86.2    | 1,153       |

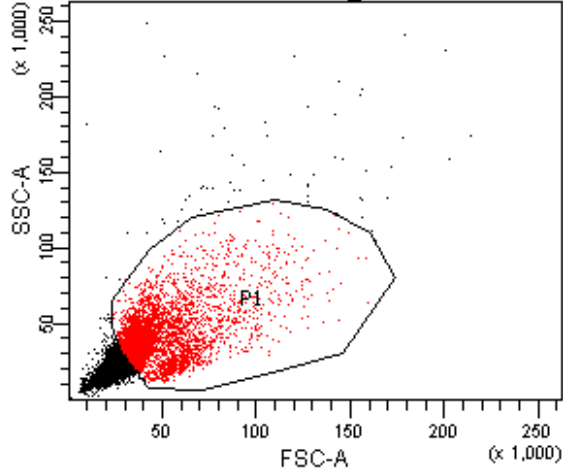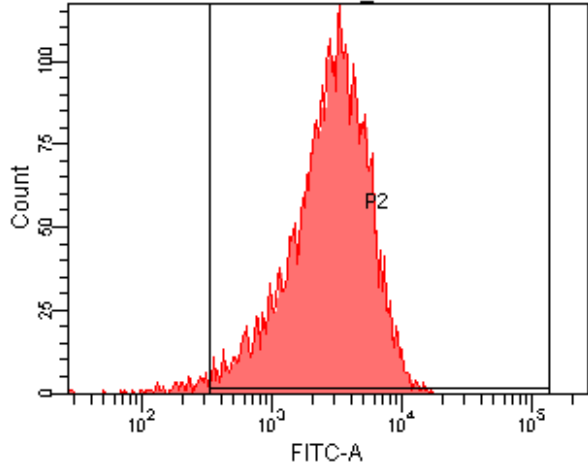

E. coli HSPs@glucan 4h

| Population   | #Events | %Parent | %Total |
|--------------|---------|---------|--------|
| ■ All Events | 10,000  | ####    | 100.0  |
| ■ P1         | 4,503   | 45.0    | 45.0   |
| ⊠ P2         | 4,430   | 98.4    | 44.3   |

E. coli HSPs@glucan 4h

| Population   | #Events | %Parent | FITC-A Mean |
|--------------|---------|---------|-------------|
| ■ All Events | 10,000  | ####    | 2,194       |
| ■ P1         | 4,503   | 45.0    | 3,255       |
| ⊠ P2         | 4,430   | 98.4    | 3,305       |

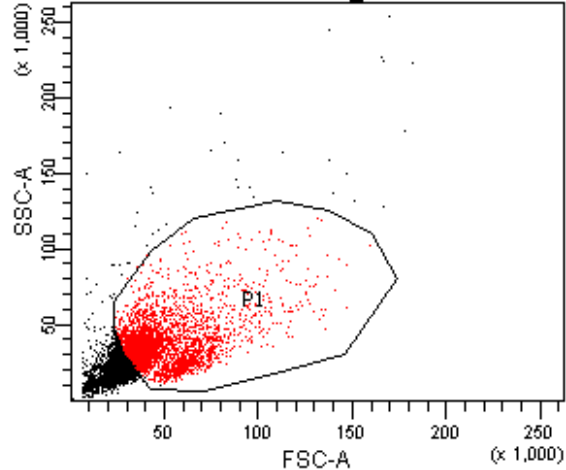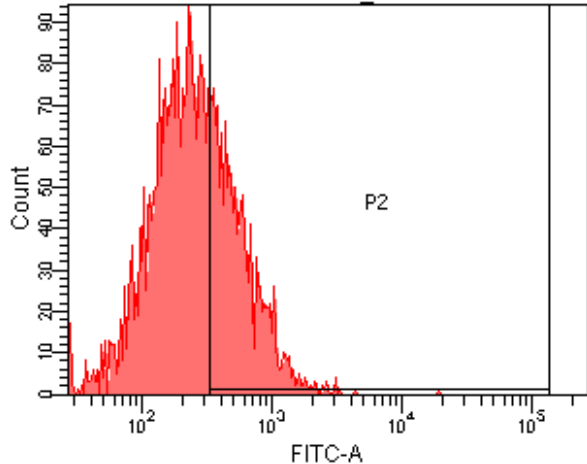

S. aureus HSPs 4h

| Population   | #Events | %Parent | %Total |
|--------------|---------|---------|--------|
| ■ All Events | 10,000  | ####    | 100.0  |
| ■ P1         | 4,041   | 40.4    | 40.4   |
| ⊠ P2         | 1,437   | 35.6    | 14.4   |

S. aureus HSPs 4h

| Population   | #Events | %Parent | FITC-A Mean |
|--------------|---------|---------|-------------|
| ■ All Events | 10,000  | ####    | 238         |
| ■ P1         | 4,041   | 40.4    | 337         |
| ⊠ P2         | 1,437   | 35.6    | 626         |

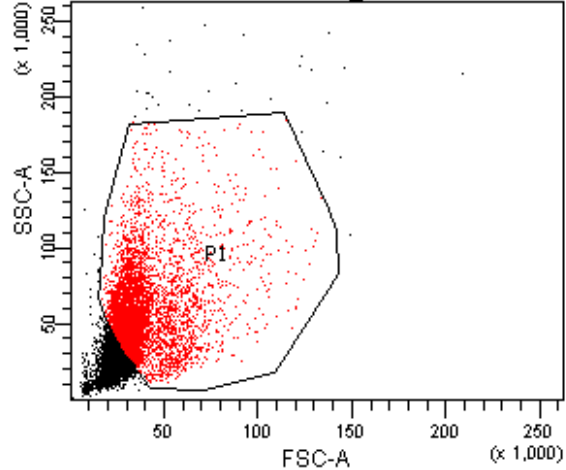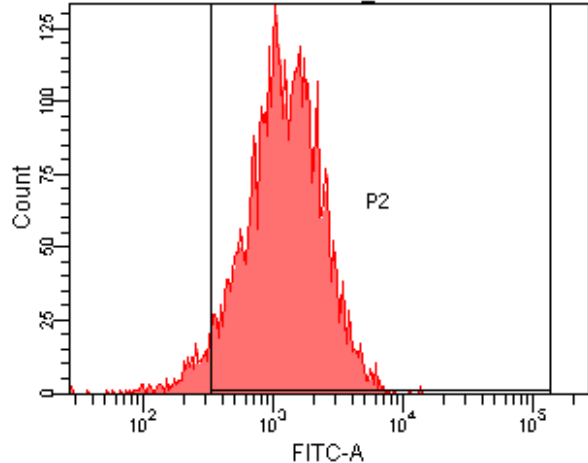

S. aureus HSPs@glucan 4h

| Population | #Events | %Parent | %Total |
|------------|---------|---------|--------|
| All Events | 10,000  | ####    | 100.0  |
| P1         | 5,201   | 52.0    | 52.0   |
| P2         | 4,971   | 95.6    | 49.7   |

S. aureus HSPs@glucan 4h

| Population | #Events | %Parent | FITC-A Mean |
|------------|---------|---------|-------------|
| All Events | 10,000  | ####    | 1,005       |
| P1         | 5,201   | 52.0    | 1,432       |
| P2         | 4,971   | 95.6    | 1,487       |
