# Supplementary material for: Antigen uptake and immunoadjuvant activity of pathogen-mimetic hollow silica particles conjugated with β-glucan
Source: Royal Society of Chemistry journal article supplement (doi:10.1039/c8tb02129e), 2018-01-01
Supplement: c8tb02129e4.pdf [file c8tb02129e4.pdf]

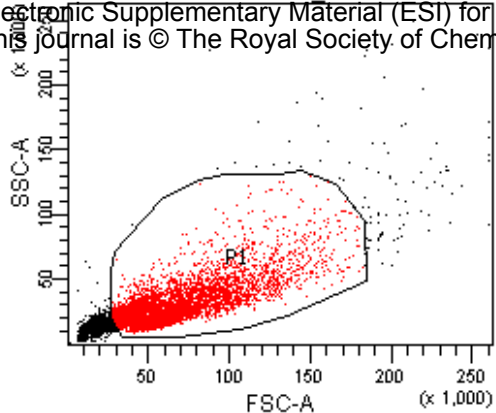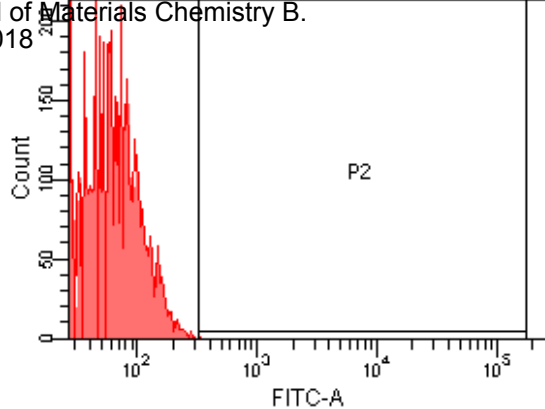

Blank

| Population | #Events | %Parent | %Total |
|------------|---------|---------|--------|
| All Events | 10,000  | ####    | 100.0  |
| P1         | 7,097   | 71.0    | 71.0   |
| P2         | 2       | 0.0     | 0.0    |

Blank

| Population | #Events | %Parent | FITC-A Mean |
|------------|---------|---------|-------------|
| All Events | 10,000  | ####    | 45          |
| P1         | 7,097   | 71.0    | 52          |
| P2         | 2       | 0.0     | 322         |

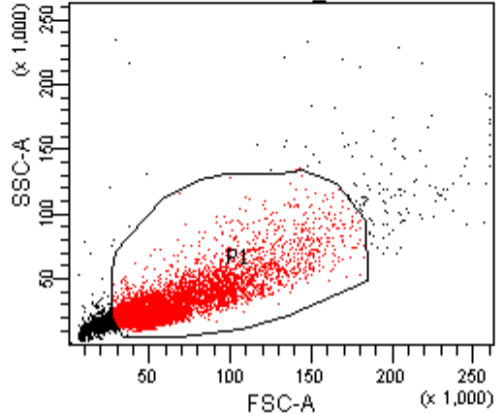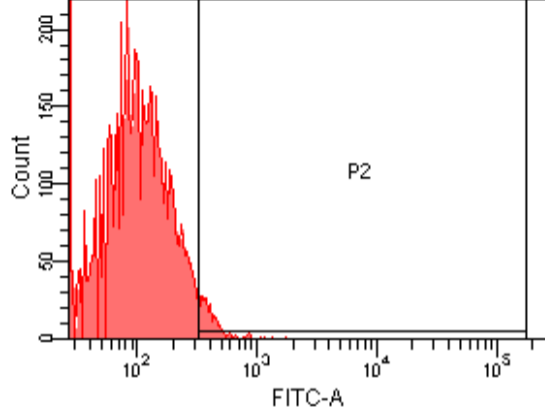

FITC-OVA 4°C 4h

| Population   | #Events | %Parent | %Total |
|--------------|---------|---------|--------|
| ■ All Events | 10,000  | ####    | 100.0  |
| ■ P1         | 7,084   | 70.8    | 70.8   |
| ⊠ P2         | 251     | 3.5     | 2.5    |

FITC-OVA 4°C 4h

| Population   | #Events | %Parent | FITC-A Mean |
|--------------|---------|---------|-------------|
| ■ All Events | 10,000  | ####    | 113         |
| ■ P1         | 7,084   | 70.8    | 119         |
| ⊠ P2         | 251     | 3.5     | 429         |

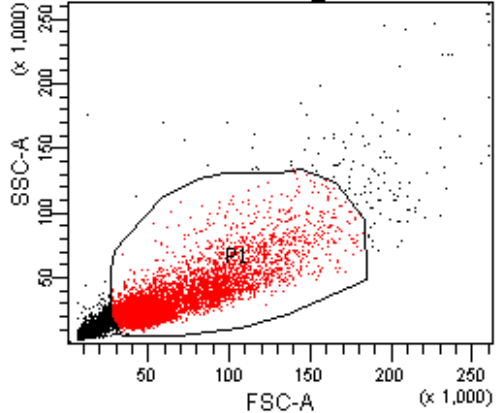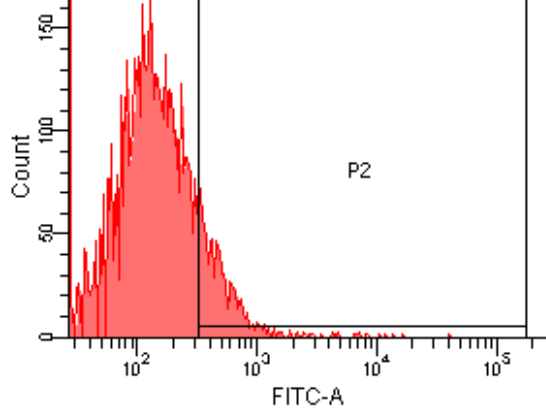

PS HSPs 4°C 4h

| Population   | #Events | %Parent | %Total |
|--------------|---------|---------|--------|
| ■ All Events | 10,000  | ####    | 100.0  |
| ■ P1         | 6,688   | 66.9    | 66.9   |
| ⊠ P2         | 966     | 14.4    | 9.7    |

PS HSPs 4°C 4h

| Population   | #Events | %Parent | FITC-A Mean |
|--------------|---------|---------|-------------|
| ■ All Events | 10,000  | ####    | 252         |
| ■ P1         | 6,688   | 66.9    | 214         |
| ⊠ P2         | 966     | 14.4    | 704         |

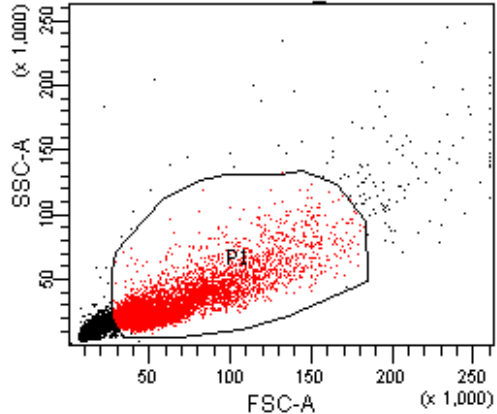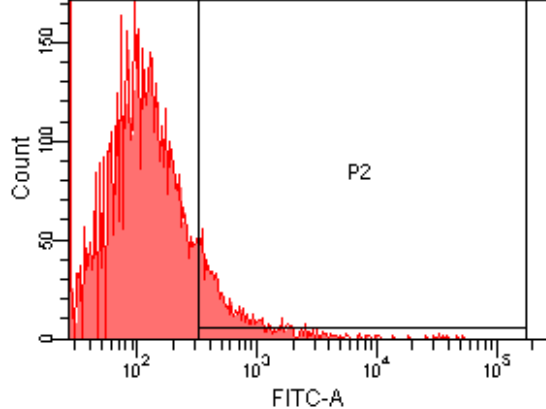

PS HSPs@glucan 4°C 4h

| Population | #Events | %Parent | %Total |
|------------|---------|---------|--------|
| All Events | 10,000  | ####    | 100.0  |
| P1         | 6,817   | 68.2    | 68.2   |
| P2         | 861     | 12.6    | 8.6    |

PS HSPs@glucan 4°C 4h

| Population | #Events | %Parent | FITC-A Mean |
|------------|---------|---------|-------------|
| All Events | 10,000  | ####    | 428         |
| P1         | 6,817   | 68.2    | 253         |
| P2         | 861     | 12.6    | 1,222       |

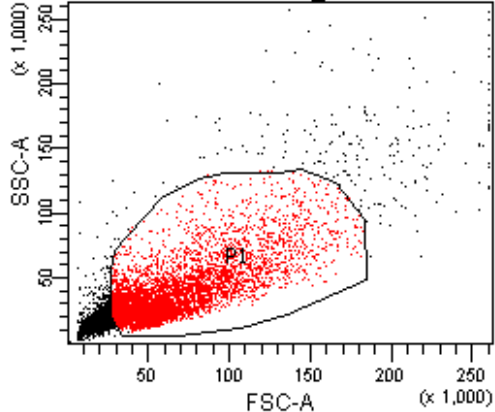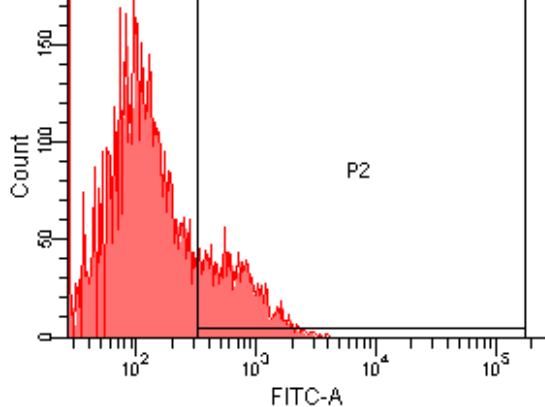

*E. coli* HSPs 4°C 4h

| Population | #Events | %Parent | %Total |
|------------|---------|---------|--------|
| All Events | 10,000  | ####    | 100.0  |
| P1         | 7,009   | 70.1    | 70.1   |
| P2         | 1,430   | 20.4    | 14.3   |

*E. coli* HSPs 4°C 4h

| Population | #Events | %Parent | FITC-A Mean |
|------------|---------|---------|-------------|
| All Events | 10,000  | ####    | 248         |
| P1         | 7,009   | 70.1    | 247         |
| P2         | 1,430   | 20.4    | 780         |

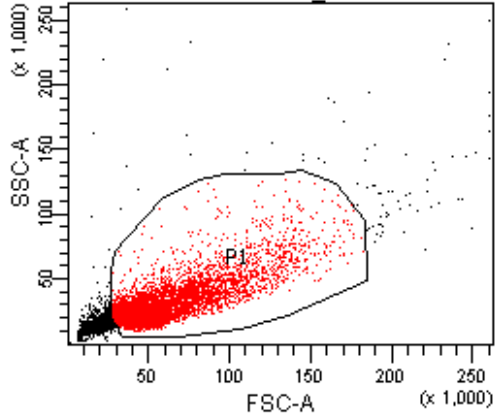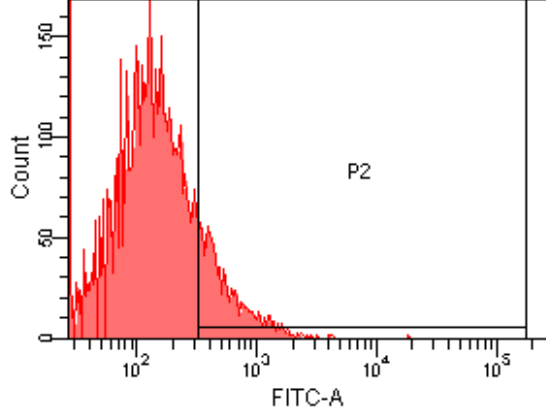

E. coli HSPs@glucan 4°C 4h

| Population   | #Events | %Parent | %Total |
|--------------|---------|---------|--------|
| ■ All Events | 10,000  | ####    | 100.0  |
| ■ P1         | 6,637   | 66.4    | 66.4   |
| ⊠ P2         | 1,050   | 15.8    | 10.5   |

E. coli HSPs@glucan 4°C 4h

| Population   | #Events | %Parent | FITC-A Mean |
|--------------|---------|---------|-------------|
| ■ All Events | 10,000  | ####    | 191         |
| ■ P1         | 6,637   | 66.4    | 211         |
| ⊠ P2         | 1,050   | 15.8    | 645         |

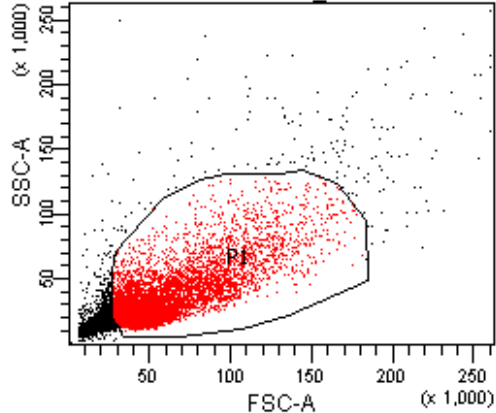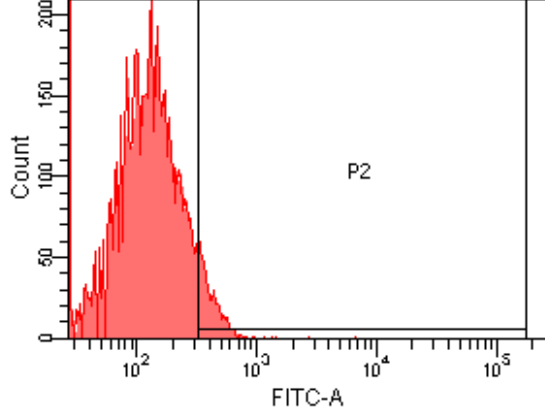

S. aureus HSPs 4°C 4h

| Population | #Events | %Parent | %Total |
|------------|---------|---------|--------|
| All Events | 10,000  | ####    | 100.0  |
| P1         | 6,947   | 69.5    | 69.5   |
| P2         | 493     | 7.1     | 4.9    |

S. aureus HSPs 4°C 4h

| Population | #Events | %Parent | FITC-A Mean |
|------------|---------|---------|-------------|
| All Events | 10,000  | ####    | 141         |
| P1         | 6,947   | 69.5    | 151         |
| P2         | 493     | 7.1     | 438         |

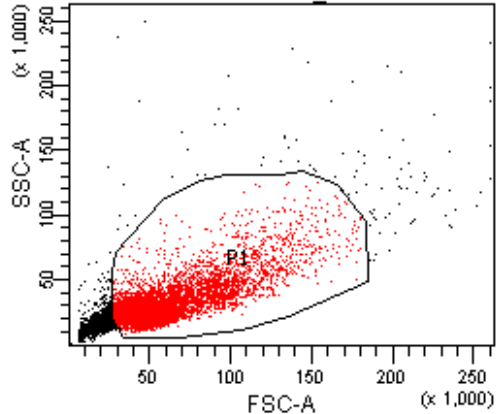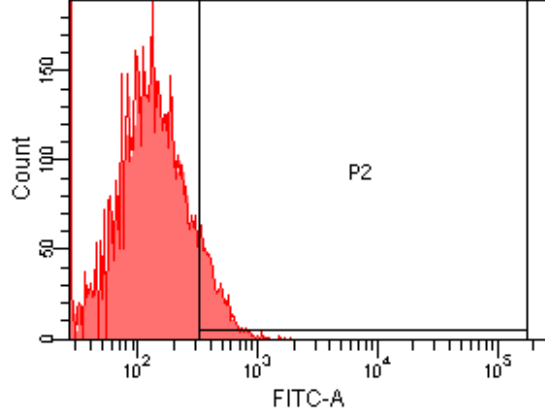

*S. aureus* HSPs@glucan 4°C 4h

| Population | #Events | %Parent | %Total |
|------------|---------|---------|--------|
| All Events | 10,000  | ####    | 100.0  |
| P1         | 6,622   | 66.2    | 66.2   |
| P2         | 693     | 10.5    | 6.9    |

*S. aureus* HSPs@glucan 4°C 4h

| Population | #Events | %Parent | FITC-A Mean |
|------------|---------|---------|-------------|
| All Events | 10,000  | ####    | 150         |
| P1         | 6,622   | 66.2    | 165         |
| P2         | 693     | 10.5    | 463         |



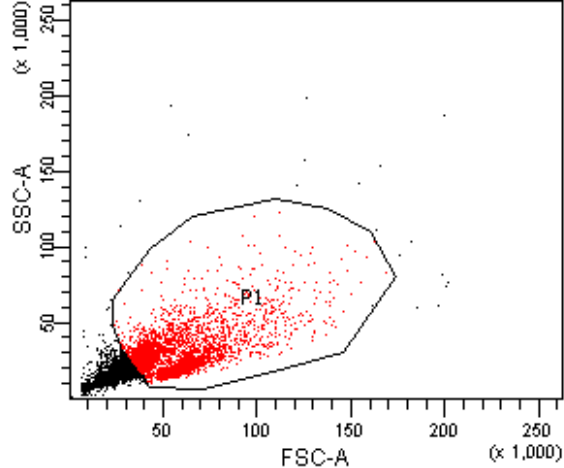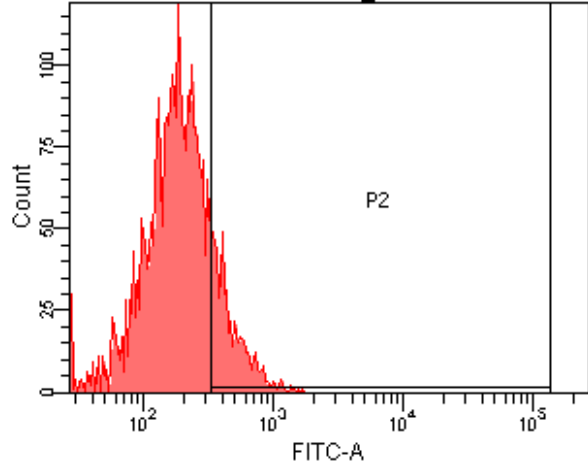

### FITC-OVA 37°C 4h

| Population   | #Events | %Parent | %Total |
|--------------|---------|---------|--------|
| ■ All Events | 10,000  | ####    | 100.0  |
| ■ P1         | 3,512   | 35.1    | 35.1   |
| ⊠ P2         | 595     | 16.9    | 5.9    |

### FITC-OVA 37°C 4h

| Population   | #Events | %Parent | FITC-A Mean |
|--------------|---------|---------|-------------|
| ■ All Events | 10,000  | ####    | 152         |
| ■ P1         | 3,512   | 35.1    | 225         |
| ⊠ P2         | 595     | 16.9    | 493         |

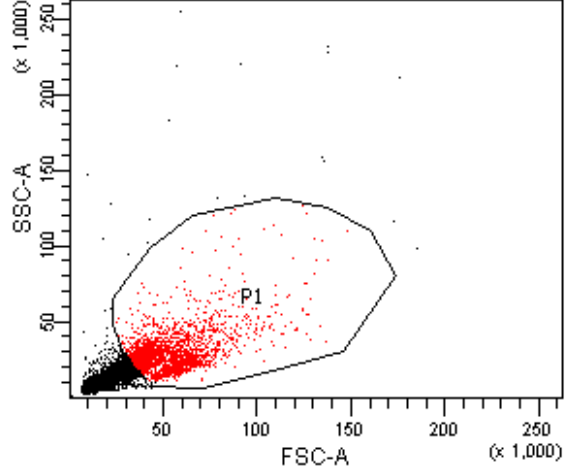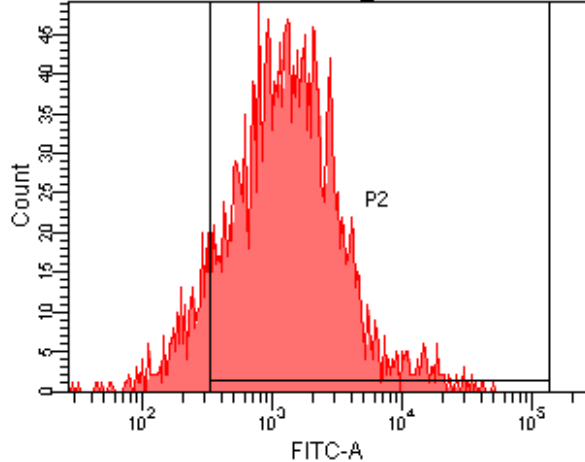

PS HSPs 37°C 4h

| Population   | #Events | %Parent | %Total |
|--------------|---------|---------|--------|
| ■ All Events | 10,000  | ####    | 100.0  |
| ■ P1         | 2,705   | 27.0    | 27.0   |
| ☒ P2         | 2,437   | 90.1    | 24.4   |

PS HSPs 37°C 4h

| Population   | #Events | %Parent | FITC-A Mean |
|--------------|---------|---------|-------------|
| ■ All Events | 10,000  | ####    | 1,240       |
| ■ P1         | 2,705   | 27.0    | 2,111       |
| ☒ P2         | 2,437   | 90.1    | 2,319       |

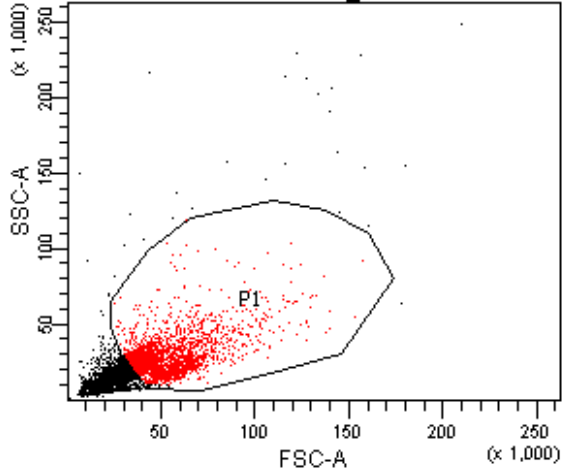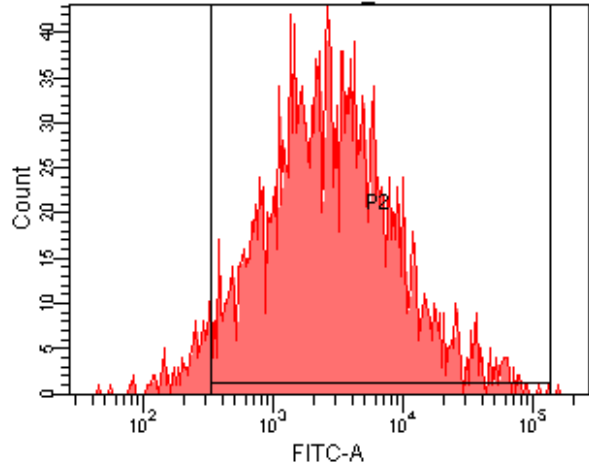

PS HSPs@glucan 37°C 4h

| Population   | #Events | %Parent | %Total |
|--------------|---------|---------|--------|
| ■ All Events | 10,000  | ####    | 100.0  |
| ■ P1         | 2,668   | 26.7    | 26.7   |
| ⊠ P2         | 2,549   | 95.5    | 25.5   |

PS HSPs@glucan 37°C 4h

| Population   | #Events | %Parent | FITC-A Mean |
|--------------|---------|---------|-------------|
| ■ All Events | 10,000  | ####    | 4,236       |
| ■ P1         | 2,668   | 26.7    | 5,661       |
| ⊠ P2         | 2,549   | 95.5    | 5,855       |

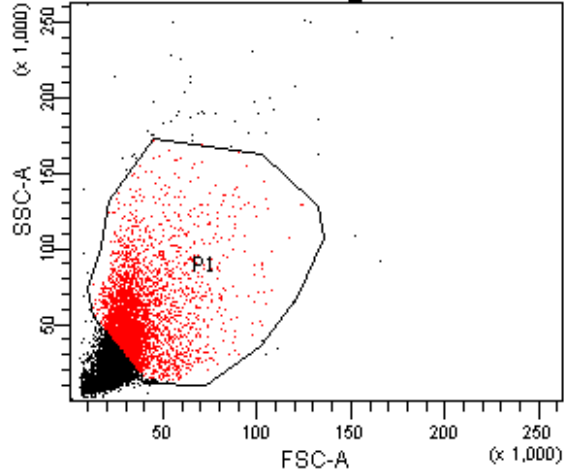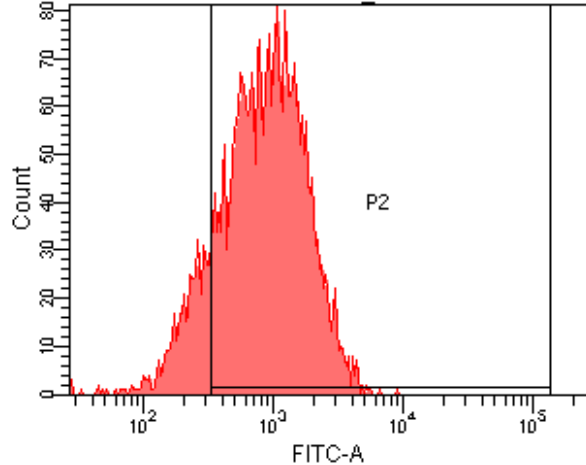

*E. coli* HSPs 37°C 4h

| Population   | #Events | %Parent | %Total |
|--------------|---------|---------|--------|
| ■ All Events | 10,000  | ####    | 100.0  |
| ■ P1         | 3,744   | 37.4    | 37.4   |
| ⊠ P2         | 3,226   | 86.2    | 32.3   |

*E. coli* HSPs 37°C 4h

| Population   | #Events | %Parent | FITC-A Mean |
|--------------|---------|---------|-------------|
| ■ All Events | 10,000  | ####    | 658         |
| ■ P1         | 3,744   | 37.4    | 1,024       |
| ⊠ P2         | 3,226   | 86.2    | 1,153       |

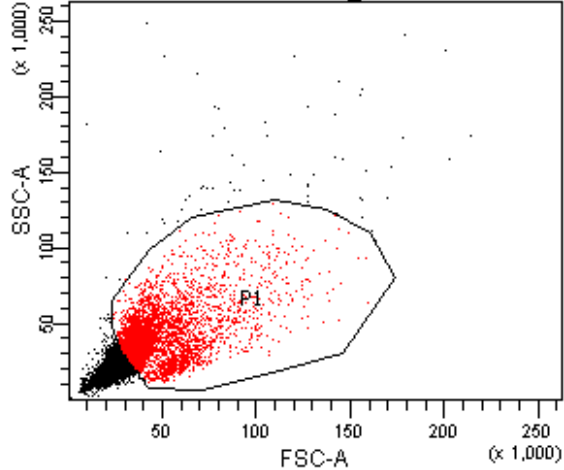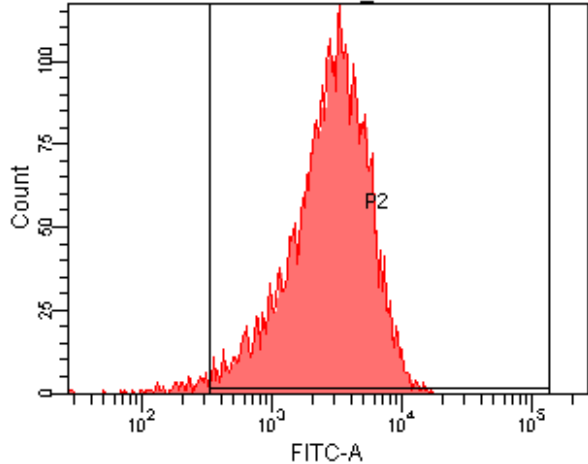

*E. coli* HSPs@glucan 37°C 4h

| Population   | #Events | %Parent | %Total |
|--------------|---------|---------|--------|
| ■ All Events | 10,000  | ####    | 100.0  |
| ■ P1         | 4,503   | 45.0    | 45.0   |
| ⊠ P2         | 4,430   | 98.4    | 44.3   |

*E. coli* HSPs@glucan 37°C 4h

| Population   | #Events | %Parent | FITC-A Mean |
|--------------|---------|---------|-------------|
| ■ All Events | 10,000  | ####    | 2,194       |
| ■ P1         | 4,503   | 45.0    | 3,255       |
| ⊠ P2         | 4,430   | 98.4    | 3,305       |

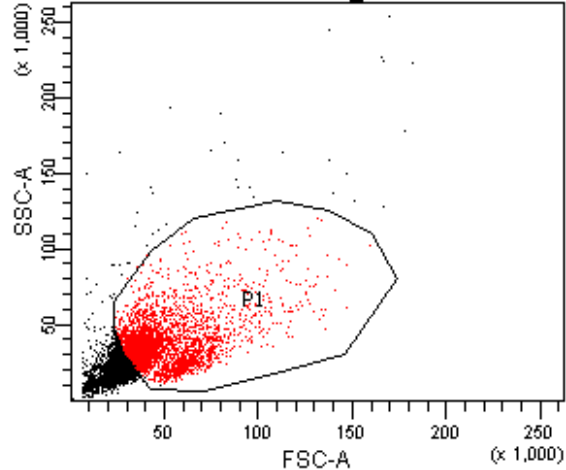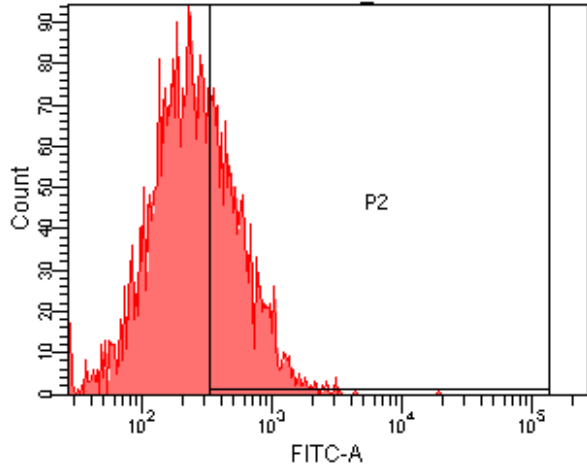

S. aureus HSPs 37°C 4h

| Population   | #Events | %Parent | %Total |
|--------------|---------|---------|--------|
| ■ All Events | 10,000  | ####    | 100.0  |
| ■ P1         | 4,041   | 40.4    | 40.4   |
| ☒ P2         | 1,437   | 35.6    | 14.4   |

S. aureus HSPs 37°C 4h

| Population   | #Events | %Parent | FITC-A Mean |
|--------------|---------|---------|-------------|
| ■ All Events | 10,000  | ####    | 238         |
| ■ P1         | 4,041   | 40.4    | 337         |
| ☒ P2         | 1,437   | 35.6    | 626         |

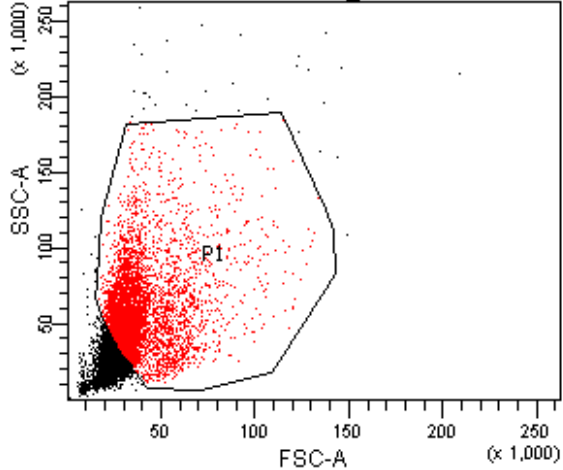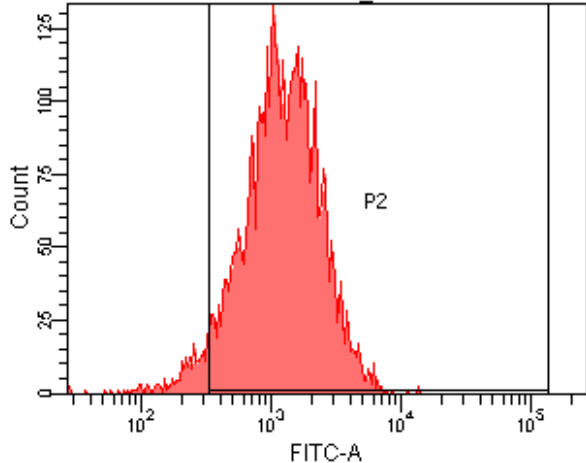

S. aureus HSPs@glucan 37°C 4h

| Population   | #Events | %Parent | %Total |
|--------------|---------|---------|--------|
| ■ All Events | 10,000  | ####    | 100.0  |
| ■ P1         | 5,201   | 52.0    | 52.0   |
| ⊠ P2         | 4,971   | 95.6    | 49.7   |

S. aureus HSPs@glucan 37°C 4h

| Population   | #Events | %Parent | FITC-A Mean |
|--------------|---------|---------|-------------|
| ■ All Events | 10,000  | ####    | 1,005       |
| ■ P1         | 5,201   | 52.0    | 1,432       |
| ⊠ P2         | 4,971   | 95.6    | 1,487       |
