# Supplementary material for: Antigen uptake and immunoadjuvant activity of pathogen-mimetic hollow silica particles conjugated with β-glucan
Source: Royal Society of Chemistry journal article supplement (doi:10.1039/c8tb02129e), 2018-01-01
Supplement: c8tb02129e5.pdf [file c8tb02129e5.pdf]

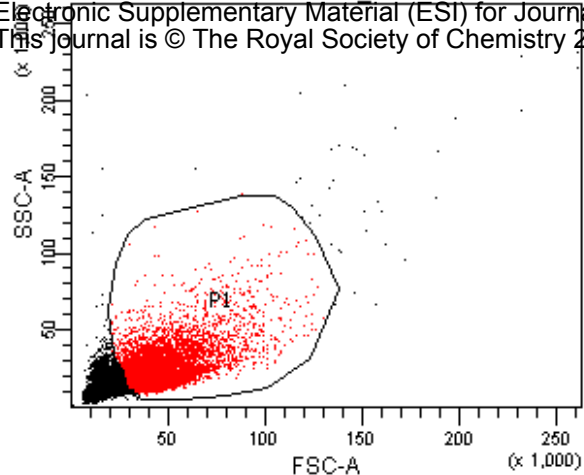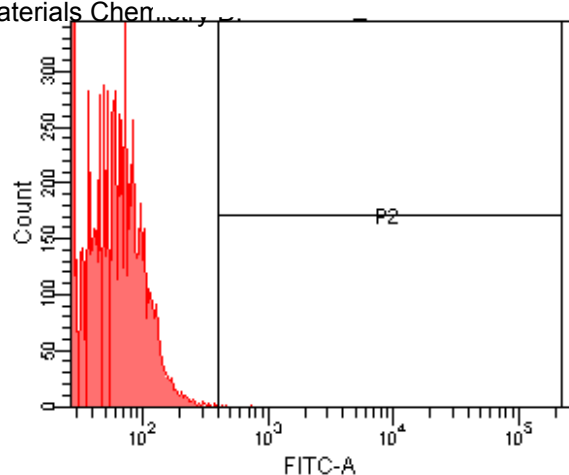

| Blank      |         |         |        |
|------------|---------|---------|--------|
| Population | #Events | %Parent | %Total |
| All Events | 30,903  | ####    | 100.0  |
| P1         | 10,000  | 32.4    | 32.4   |
| P2         | 3       | 0.0     | 0.0    |

| Blank      |         |         |             |
|------------|---------|---------|-------------|
| Population | #Events | %Parent | FITC-A Mean |
| All Events | 30,903  | ####    | 36          |
| P1         | 10,000  | 32.4    | 52          |
| P2         | 3       | 0.0     | 544         |

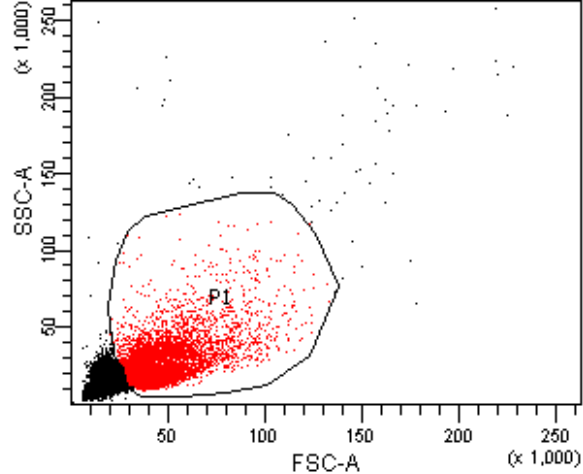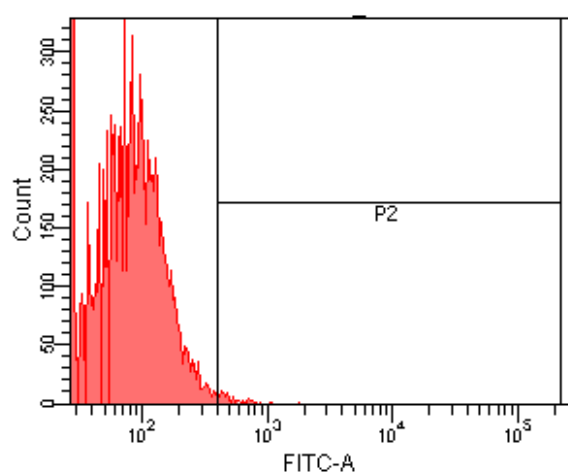

FITC-OVA No inhibitor

| Population | #Events | %Parent | %Total |
|------------|---------|---------|--------|
| All Events | 32,061  | ####    | 100.0  |
| P1         | 10,000  | 31.2    | 31.2   |
| P2         | 76      | 0.8     | 0.2    |

FITC-OVA No inhibitor

| Population | #Events | %Parent | FITC-A Mean |
|------------|---------|---------|-------------|
| All Events | 32,061  | ####    | 58          |
| P1         | 10,000  | 31.2    | 90          |
| P2         | 76      | 0.8     | 560         |

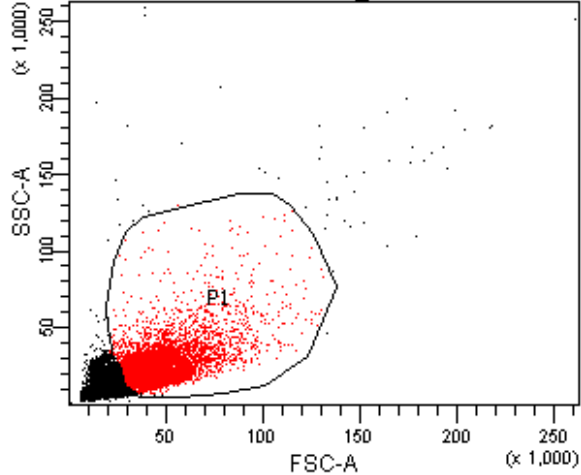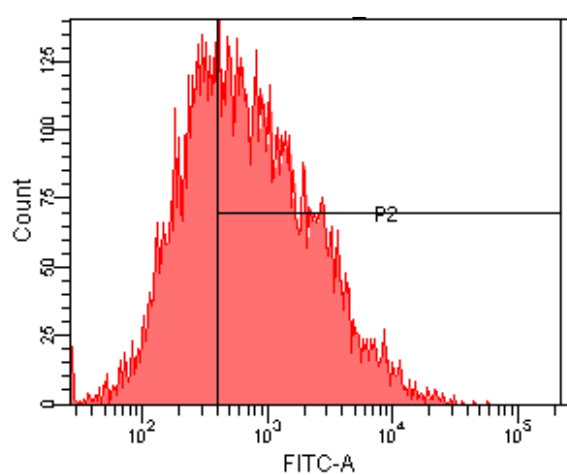

PS HSPs No inhibitor

| Population | #Events | %Parent | %Total |
|------------|---------|---------|--------|
| All Events | 35,411  | ####    | 100.0  |
| P1         | 10,000  | 28.2    | 28.2   |
| P2         | 6,500   | 65.0    | 18.4   |

PS HSPs No inhibitor

| Population | #Events | %Parent | FITC-A Mean |
|------------|---------|---------|-------------|
| All Events | 35,411  | ####    | 921         |
| P1         | 10,000  | 28.2    | 1,435       |
| P2         | 6,500   | 65.0    | 2,083       |

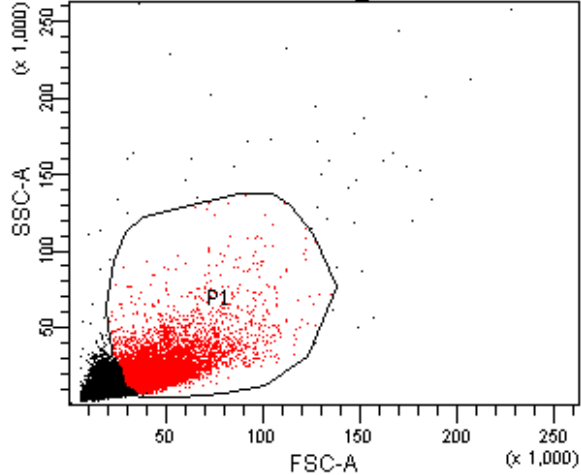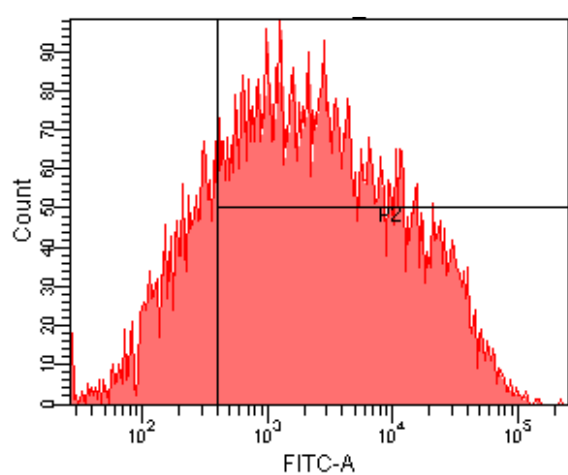

PS HSPs@glucan No inhibitor

| Population   | #Events | %Parent | %Total |
|--------------|---------|---------|--------|
| ■ All Events | 33,221  | ####    | 100.0  |
| ■ P1         | 10,000  | 30.1    | 30.1   |
| ⊠ P2         | 8,149   | 81.5    | 24.5   |

PS HSPs@glucan No inhibitor

| Population   | #Events | %Parent | FITC-A Mean |
|--------------|---------|---------|-------------|
| ■ All Events | 33,221  | ####    | 4,600       |
| ■ P1         | 10,000  | 30.1    | 7,043       |
| ⊠ P2         | 8,149   | 81.5    | 8,594       |

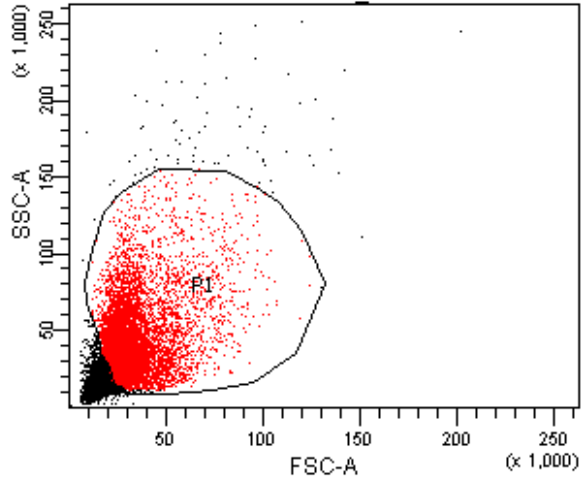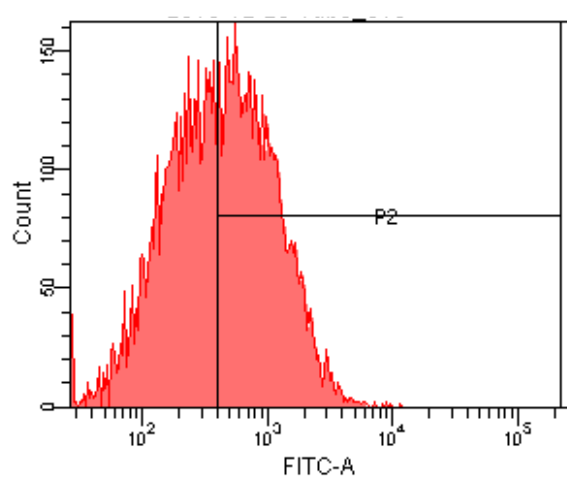

E. coli HSPs No inhibitor

| Population | #Events | %Parent | %Total |
|------------|---------|---------|--------|
| All Events | 16,950  | ####    | 100.0  |
| P1         | 10,000  | 59.0    | 59.0   |
| P2         | 5,288   | 52.9    | 31.2   |

E. coli HSPs No inhibitor

| Population | #Events | %Parent | FITC-A Mean |
|------------|---------|---------|-------------|
| All Events | 16,950  | ####    | 474         |
| P1         | 10,000  | 59.0    | 643         |
| P2         | 5,288   | 52.9    | 1,031       |

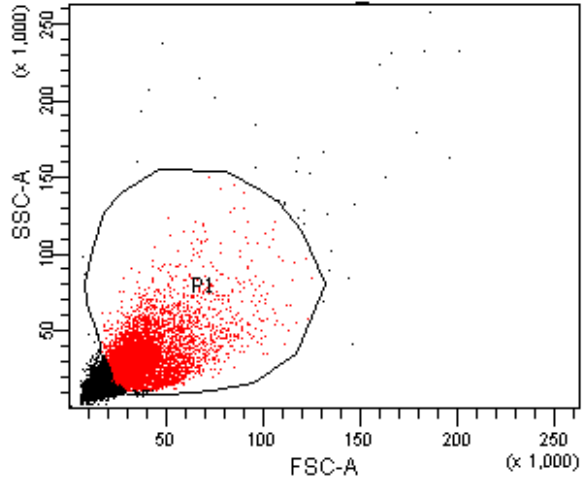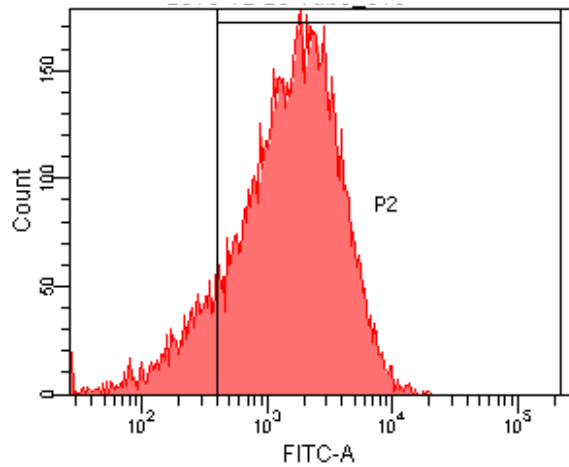

E. coli HSPs@glucan No inhibitor

| Population | #Events | %Parent | %Total |
|------------|---------|---------|--------|
| All Events | 18,048  | ####    | 100.0  |
| P1         | 10,000  | 55.4    | 55.4   |
| P2         | 8,791   | 87.9    | 48.7   |

E. coli HSPs@glucan No inhibitor

| Population | #Events | %Parent | FITC-A Mean |
|------------|---------|---------|-------------|
| All Events | 18,048  | ####    | 1,441       |
| P1         | 10,000  | 55.4    | 2,045       |
| P2         | 8,791   | 87.9    | 2,295       |

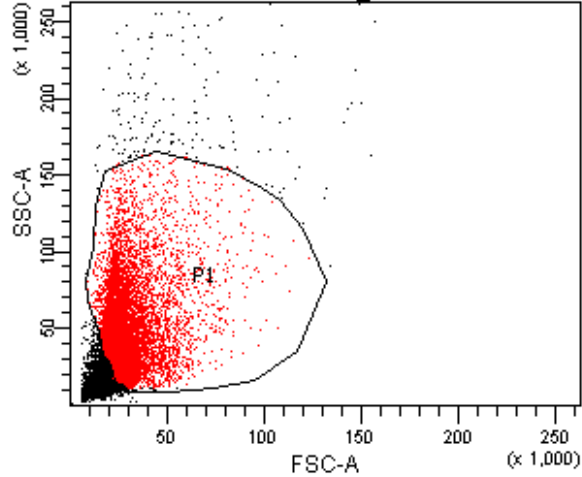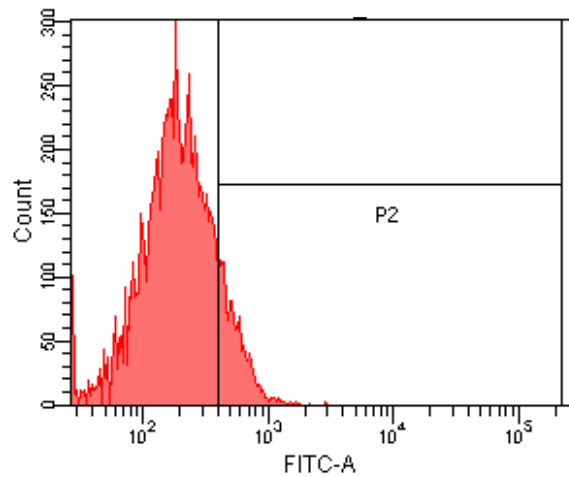

S. aureus HSPs No inhibitor

| Population | #Events | %Parent | %Total |
|------------|---------|---------|--------|
| All Events | 15,741  | ####    | 100.0  |
| P1         | 10,074  | 64.0    | 64.0   |
| P2         | 1,363   | 13.5    | 8.7    |

S. aureus HSPs No inhibitor

| Population | #Events | %Parent | FITC-A Mean |
|------------|---------|---------|-------------|
| All Events | 15,741  | ####    | 196         |
| P1         | 10,074  | 64.0    | 237         |
| P2         | 1,363   | 13.5    | 574         |

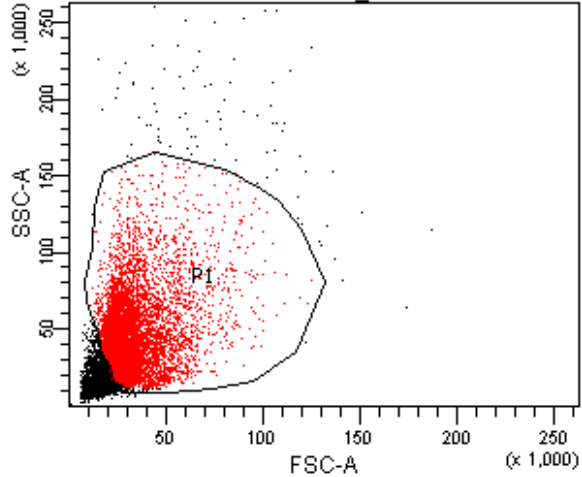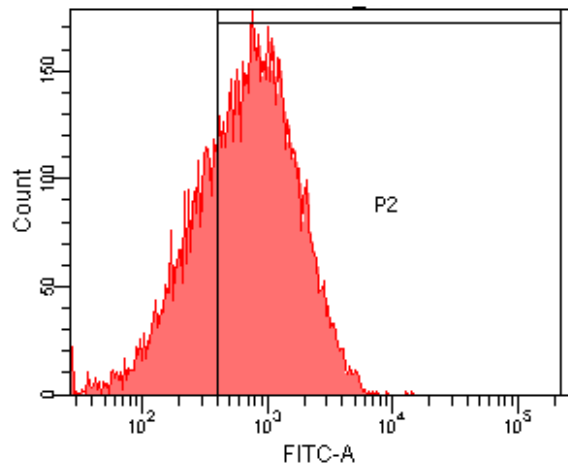

S. aureus HSPs@glucan No inhibitor

| Population | #Events | %Parent | %Total |
|------------|---------|---------|--------|
| All Events | 16,825  | ####    | 100.0  |
| P1         | 10,000  | 59.4    | 59.4   |
| P2         | 7,146   | 71.5    | 42.5   |

S. aureus HSPs@glucan No inhibitor

| Population | #Events | %Parent | FITC-A Mean |
|------------|---------|---------|-------------|
| All Events | 16,825  | ####    | 706         |
| P1         | 10,000  | 59.4    | 953         |
| P2         | 7,146   | 71.5    | 1,241       |



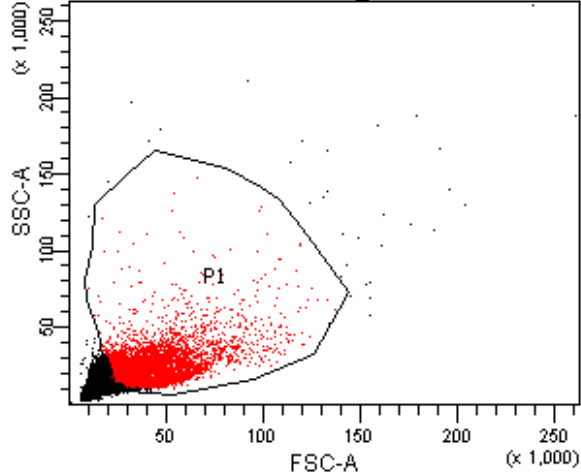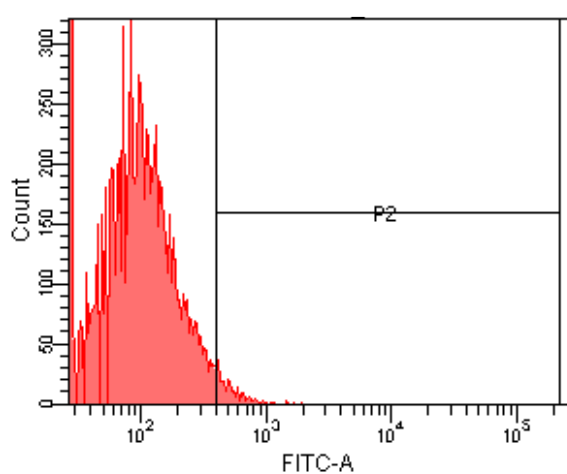

#### FITC-OVA Genistein

| Population | #Events | %Parent | %Total |
|------------|---------|---------|--------|
| All Events | 25,211  | ###     | 100.0  |
| P1         | 10,027  | 39.8    | 39.8   |
| P2         | 262     | 2.6     | 1.0    |

#### FITC-OVA Genistein

| Population | #Events | %Parent | FITC-A Mean |
|------------|---------|---------|-------------|
| All Events | 25,211  | ###     | 84          |
| P1         | 10,027  | 39.8    | 119         |
| P2         | 262     | 2.6     | 550         |

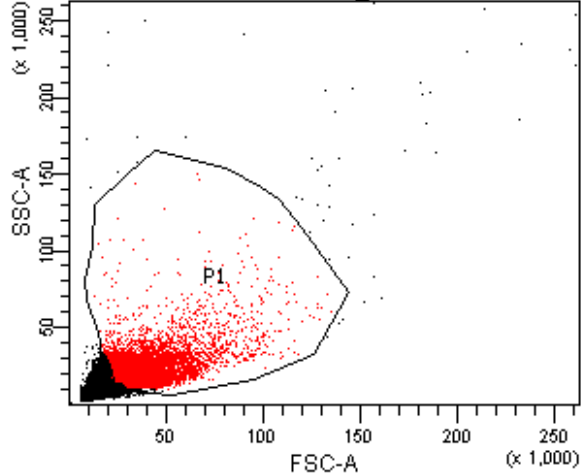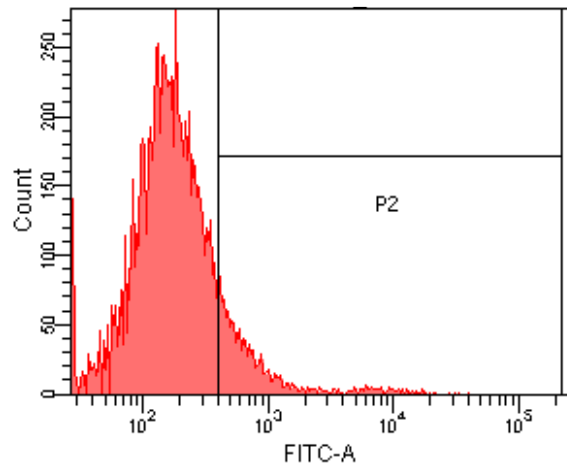

PS HSPs Genistein

| Population   | #Events | %Parent | %Total |
|--------------|---------|---------|--------|
| ■ All Events | 25,605  | ####    | 100.0  |
| ■ P1         | 10,000  | 39.1    | 39.1   |
| ⊠ P2         | 1,342   | 13.4    | 5.2    |

PS HSPs Genistein

| Population   | #Events | %Parent | FITC-A Mean |
|--------------|---------|---------|-------------|
| ■ All Events | 25,605  | ####    | 327         |
| ■ P1         | 10,000  | 39.1    | 343         |
| ⊠ P2         | 1,342   | 13.4    | 1,477       |

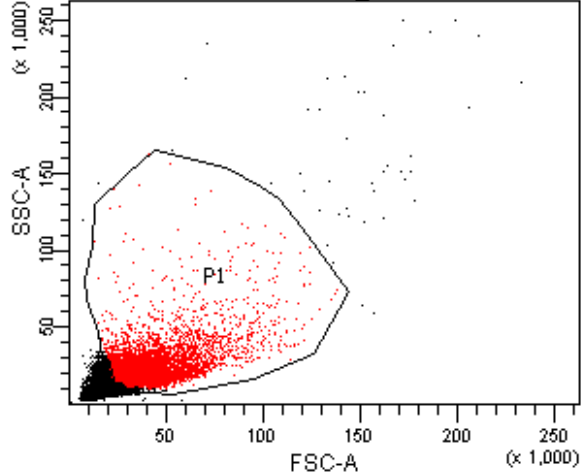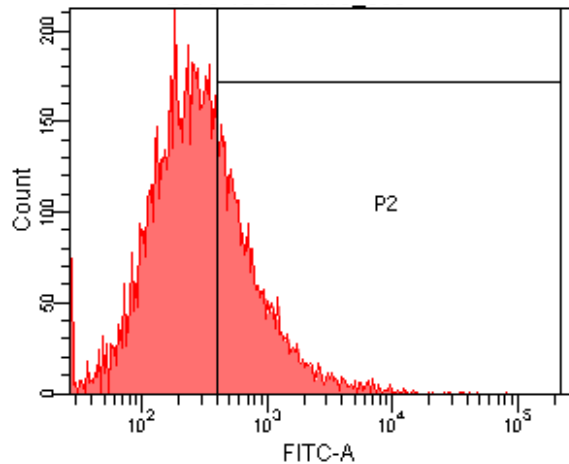

PS HSPs@glucan Genistein

| Population | #Events | %Parent | %Total |
|------------|---------|---------|--------|
| All Events | 23,790  | ####    | 100.0  |
| P1         | 10,000  | 42.0    | 42.0   |
| P2         | 3,328   | 33.3    | 14.0   |

PS HSPs@glucan Genistein

| Population | #Events | %Parent | FITC-A Mean |
|------------|---------|---------|-------------|
| All Events | 23,790  | ####    | 772         |
| P1         | 10,000  | 42.0    | 536         |
| P2         | 3,328   | 33.3    | 1,207       |

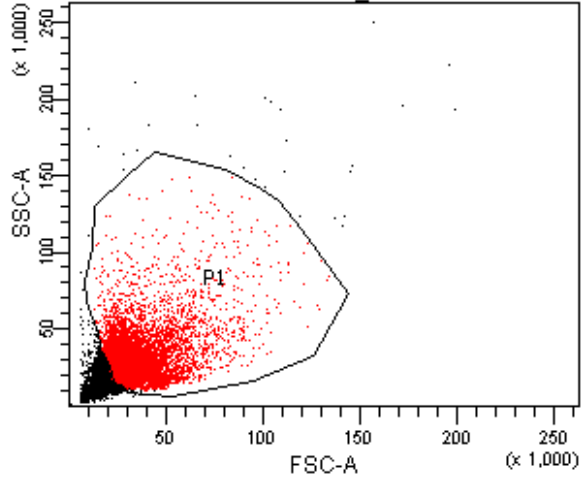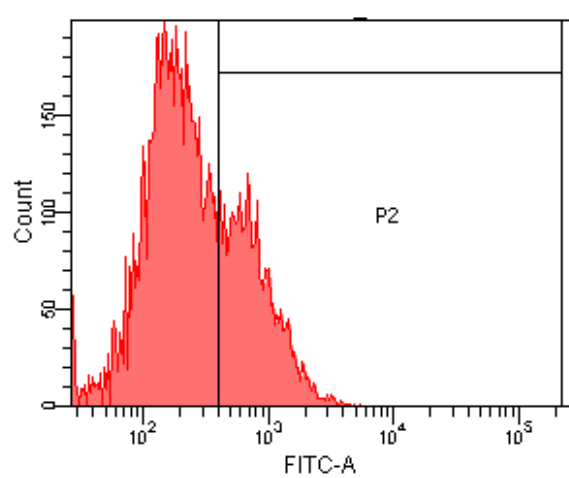

E. coli HSPs Genistein

| Population | #Events | %Parent | %Total |
|------------|---------|---------|--------|
| All Events | 18,795  | ####    | 100.0  |
| P1         | 10,000  | 53.2    | 53.2   |
| P2         | 3,157   | 31.6    | 16.8   |

E. coli HSPs Genistein

| Population | #Events | %Parent | FITC-A Mean |
|------------|---------|---------|-------------|
| All Events | 18,795  | ####    | 297         |
| P1         | 10,000  | 53.2    | 399         |
| P2         | 3,157   | 31.6    | 872         |

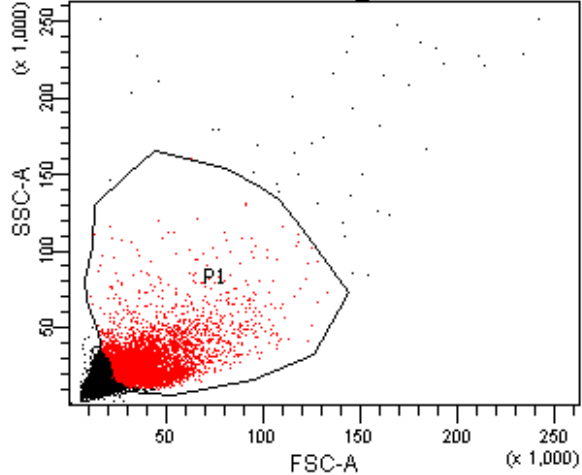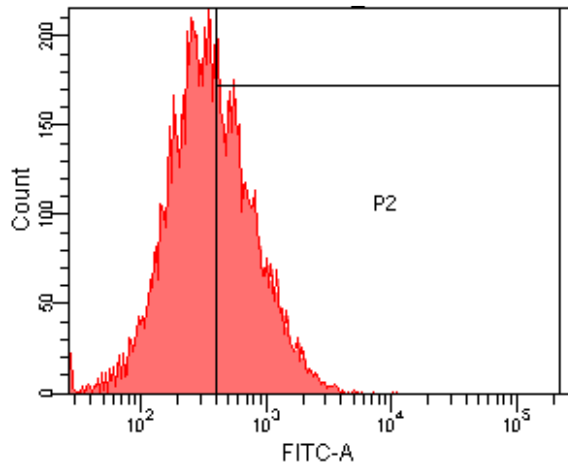

E. coli HSPs@glucan Genistein

| Population   | #Events | %Parent | %Total |
|--------------|---------|---------|--------|
| ■ All Events | 19,696  | ####    | 100.0  |
| ■ P1         | 10,000  | 50.8    | 50.8   |
| ⊠ P2         | 4,277   | 42.8    | 21.7   |

E. coli HSPs@glucan Genistein

| Population   | #Events | %Parent | FITC-A Mean |
|--------------|---------|---------|-------------|
| ■ All Events | 19,696  | ####    | 369         |
| ■ P1         | 10,000  | 50.8    | 488         |
| ⊠ P2         | 4,277   | 42.8    | 831         |

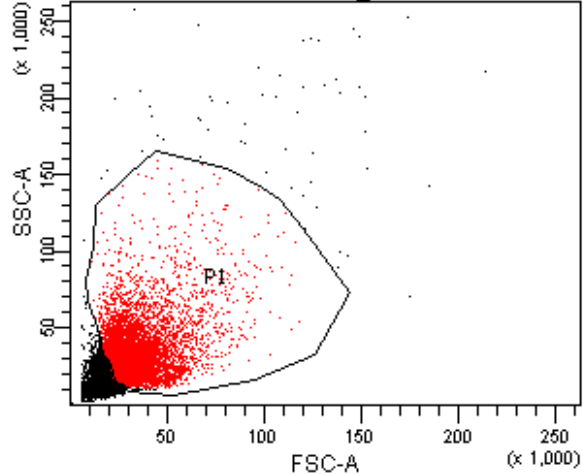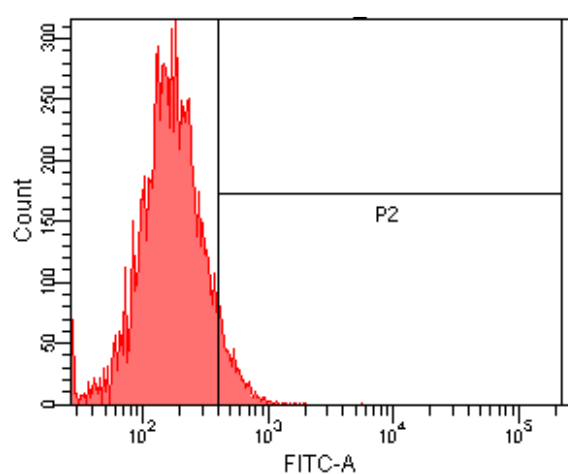

S. aureus HSPs Genistein

| Population | #Events | %Parent | %Total |
|------------|---------|---------|--------|
| All Events | 17,717  | ####    | 100.0  |
| P1         | 10,000  | 56.4    | 56.4   |
| P2         | 694     | 6.9     | 3.9    |

S. aureus HSPs Genistein

| Population | #Events | %Parent | FITC-A Mean |
|------------|---------|---------|-------------|
| All Events | 17,717  | ####    | 168         |
| P1         | 10,000  | 56.4    | 201         |
| P2         | 694     | 6.9     | 556         |

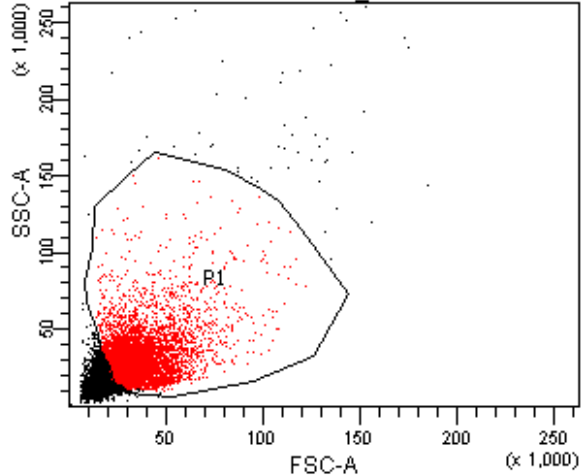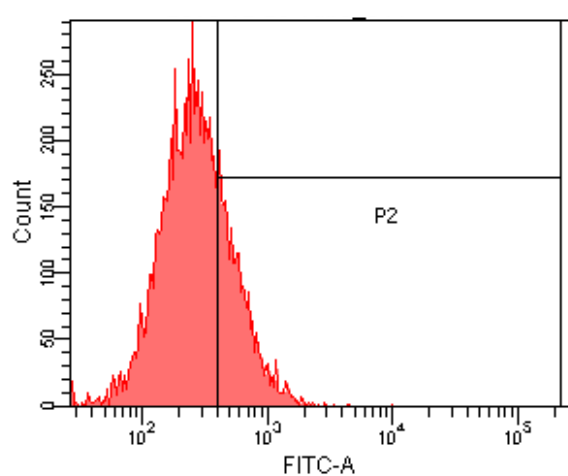

S. aureus HSPs@glucan Genistein

| Population | #Events | %Parent | %Total |
|------------|---------|---------|--------|
| All Events | 18,792  | ####    | 100.0  |
| P1         | 10,000  | 53.2    | 53.2   |
| P2         | 2,657   | 26.6    | 14.1   |

S. aureus HSPs@glucan Genistein

| Population | #Events | %Parent | FITC-A Mean |
|------------|---------|---------|-------------|
| All Events | 18,792  | ####    | 261         |
| P1         | 10,000  | 53.2    | 333         |
| P2         | 2,657   | 26.6    | 647         |

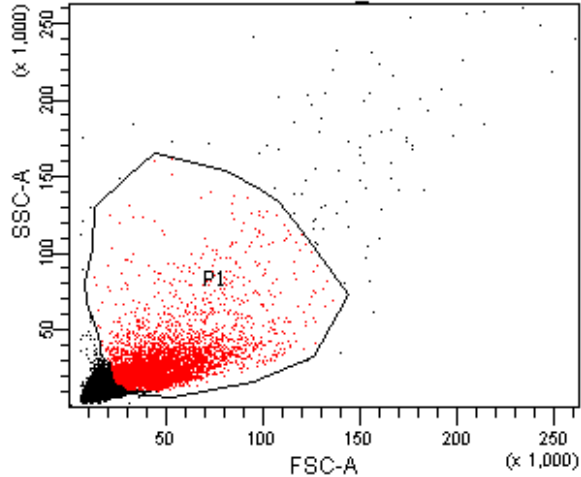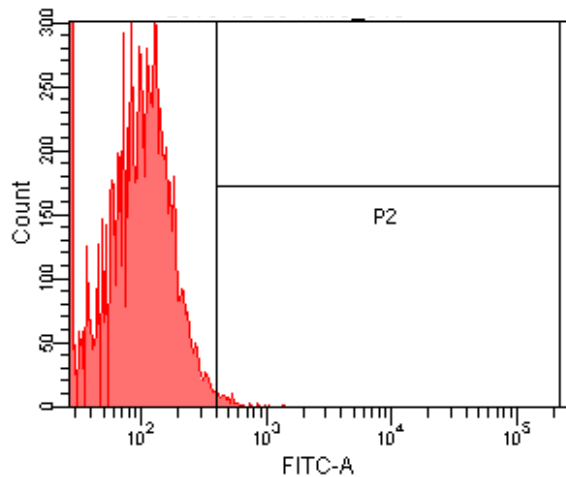

#### FITC-OVA Chlorpromazine

| Population | #Events | %Parent | %Total |
|------------|---------|---------|--------|
| All Events | 26,551  | ####    | 100.0  |
| P1         | 10,000  | 37.7    | 37.7   |
| P2         | 84      | 0.8     | 0.3    |

#### FITC-OVA Chlorpromazine

| Population | #Events | %Parent | FITC-A Mean |
|------------|---------|---------|-------------|
| All Events | 26,551  | ####    | 77          |
| P1         | 10,000  | 37.7    | 110         |
| P2         | 84      | 0.8     | 531         |



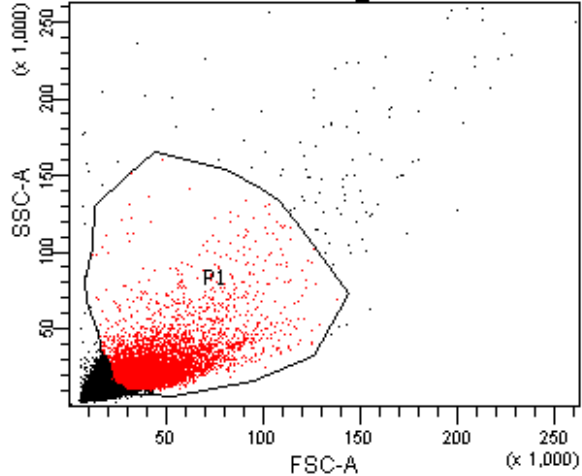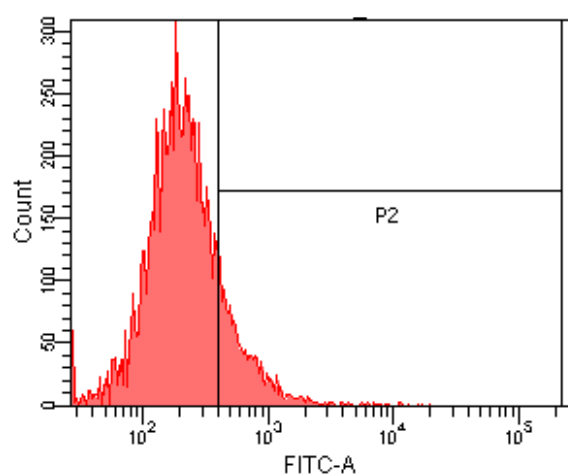

PS HSPs Chlorpromazine

| Population | #Events | %Parent | %Total |
|------------|---------|---------|--------|
| All Events | 28,329  | ####    | 100.0  |
| P1         | 10,000  | 35.3    | 35.3   |
| P2         | 1,664   | 16.6    | 5.9    |

PS HSPs Chlorpromazine

| Population | #Events | %Parent | FITC-A Mean |
|------------|---------|---------|-------------|
| All Events | 28,329  | ####    | 298         |
| P1         | 10,000  | 35.3    | 304         |
| P2         | 1,664   | 16.6    | 860         |

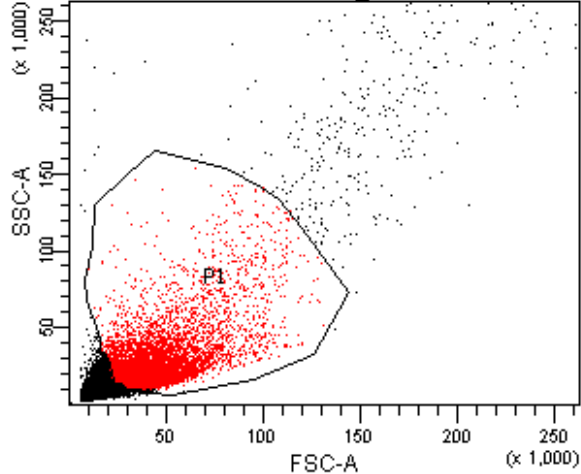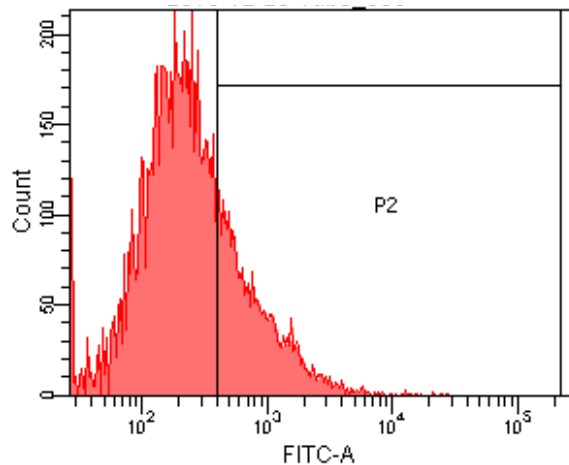

PS HSPs@glucan Chlorpromazine

| Population | #Events | %Parent | %Total |
|------------|---------|---------|--------|
| All Events | 32,013  | ####    | 100.0  |
| P1         | 10,000  | 31.2    | 31.2   |
| P2         | 2,694   | 26.9    | 8.4    |

PS HSPs@glucan Chlorpromazine

| Population | #Events | %Parent | FITC-A Mean |
|------------|---------|---------|-------------|
| All Events | 32,013  | ####    | 852         |
| P1         | 10,000  | 31.2    | 435         |
| P2         | 2,694   | 26.9    | 1,117       |

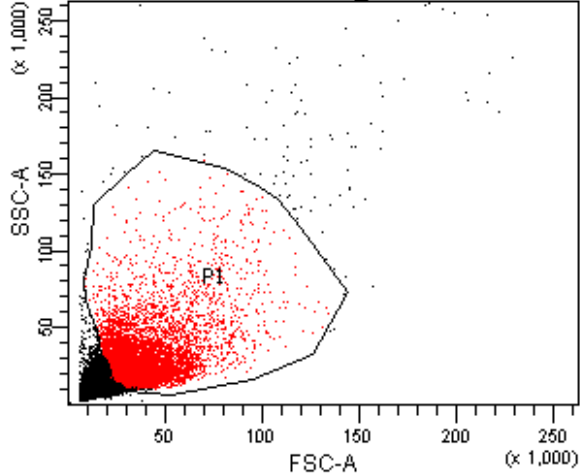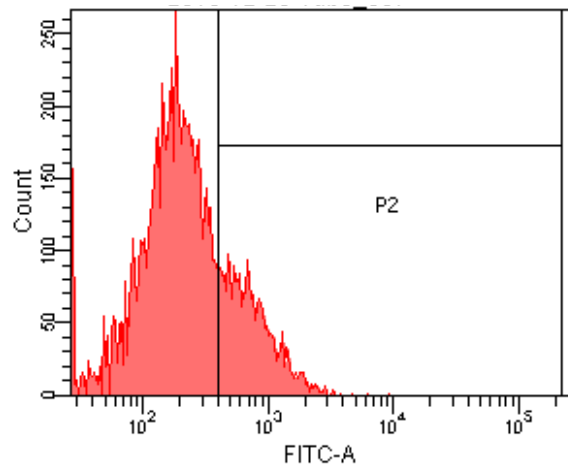

E. coli HSPs Chlorpromazine

| Population | #Events | %Parent | %Total |
|------------|---------|---------|--------|
| All Events | 25,567  | ####    | 100.0  |
| P1         | 10,000  | 39.1    | 39.1   |
| P2         | 2,425   | 24.2    | 9.5    |

E. coli HSPs Chlorpromazine

| Population | #Events | %Parent | FITC-A Mean |
|------------|---------|---------|-------------|
| All Events | 25,567  | ####    | 230         |
| P1         | 10,000  | 39.1    | 336         |
| P2         | 2,425   | 24.2    | 825         |

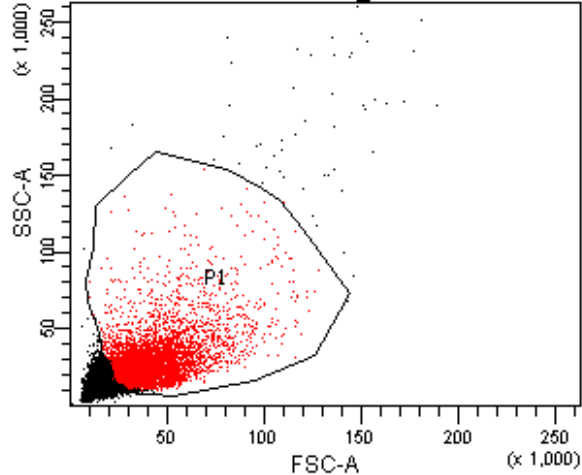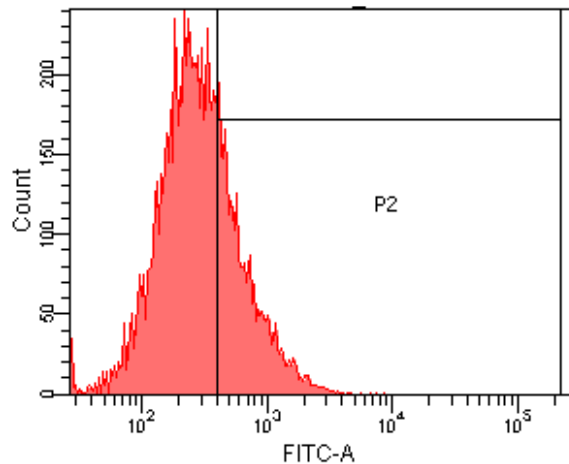

E. coli HSPs@glucan Chlorpromazine

| Population | #Events | %Parent | %Total |
|------------|---------|---------|--------|
| All Events | 25,211  | ####    | 100.0  |
| P1         | 10,000  | 39.7    | 39.7   |
| P2         | 3,049   | 30.5    | 12.1   |

E. coli HSPs@glucan Chlorpromazine

| Population | #Events | %Parent | FITC-A Mean |
|------------|---------|---------|-------------|
| All Events | 25,211  | ####    | 268         |
| P1         | 10,000  | 39.7    | 384         |
| P2         | 3,049   | 30.5    | 764         |

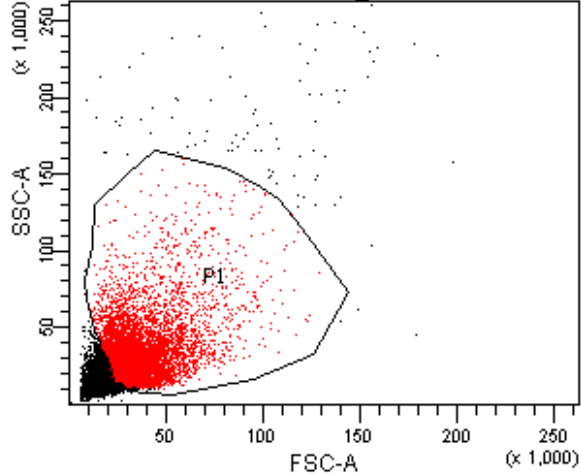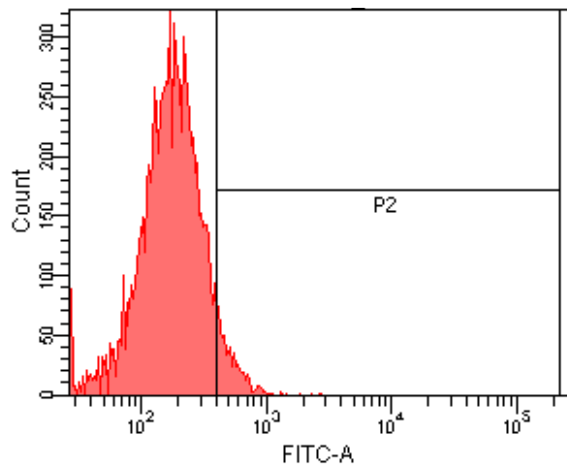

S. aureus HSPs Chlorpromazine

| Population | #Events | %Parent | %Total |
|------------|---------|---------|--------|
| All Events | 23,310  | ####    | 100.0  |
| P1         | 10,014  | 43.0    | 43.0   |
| P2         | 639     | 6.4     | 2.7    |

S. aureus HSPs Chlorpromazine

| Population | #Events | %Parent | FITC-A Mean |
|------------|---------|---------|-------------|
| All Events | 23,310  | ####    | 151         |
| P1         | 10,014  | 43.0    | 203         |
| P2         | 639     | 6.4     | 544         |

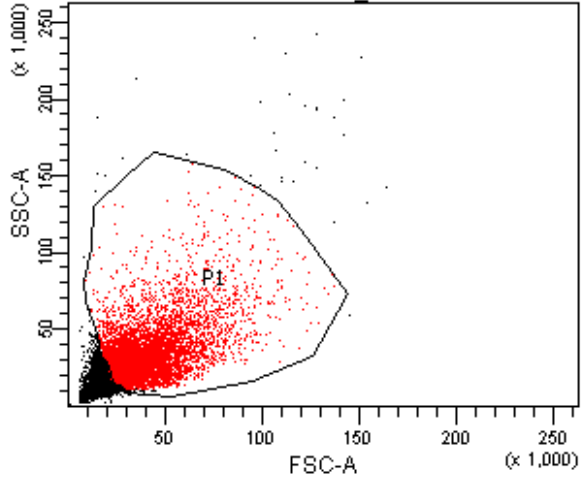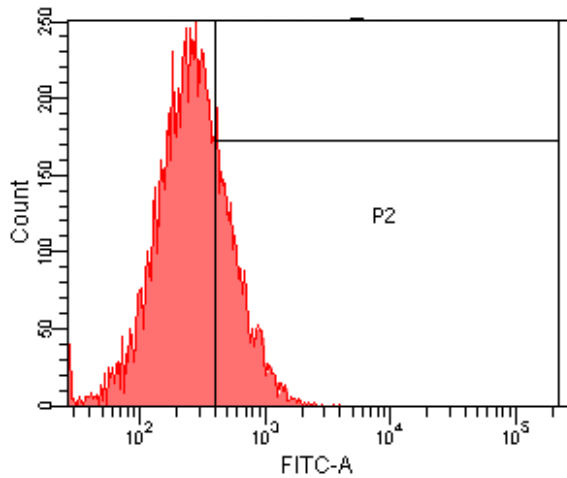

S. aureus HSPs@glucan Chlorpromazine

| Population | #Events | %Parent | %Total |
|------------|---------|---------|--------|
| All Events | 20,425  | ####    | 100.0  |
| P1         | 10,000  | 49.0    | 49.0   |
| P2         | 2,657   | 26.6    | 13.0   |

S. aureus HSPs@glucan Chlorpromazine

| Population | #Events | %Parent | FITC-A Mean |
|------------|---------|---------|-------------|
| All Events | 20,425  | ####    | 235         |
| P1         | 10,000  | 49.0    | 331         |
| P2         | 2,657   | 26.6    | 643         |

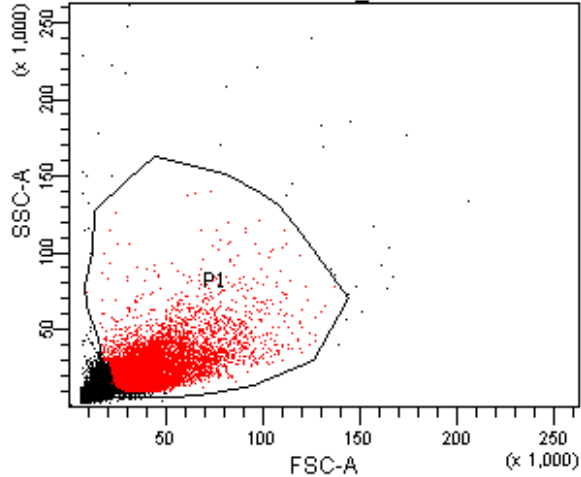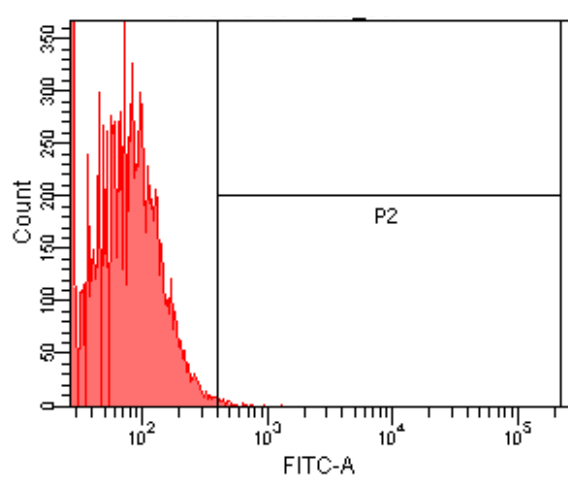

### FITC-OVA Amilorid

| Population | #Events | %Parent | %Total |
|------------|---------|---------|--------|
| All Events | 35,846  | ####    | 100.0  |
| P1         | 11,700  | 32.6    | 32.6   |
| P2         | 41      | 0.4     | 0.1    |

### FITC-OVA Amilorid

| Population | #Events | %Parent | FITC-A Mean |
|------------|---------|---------|-------------|
| All Events | 35,846  | ####    | 51          |
| P1         | 11,700  | 32.6    | 79          |
| P2         | 41      | 0.4     | 518         |

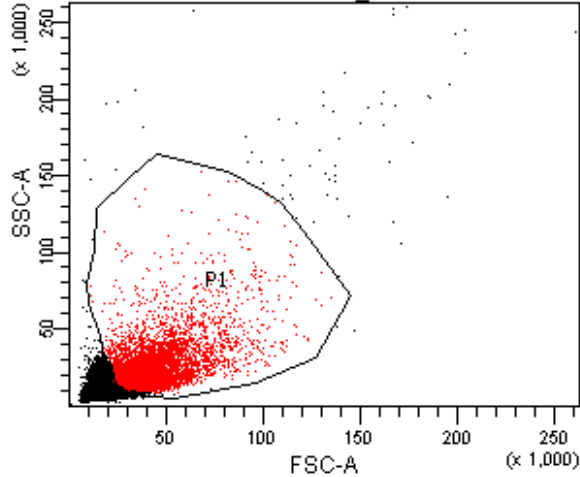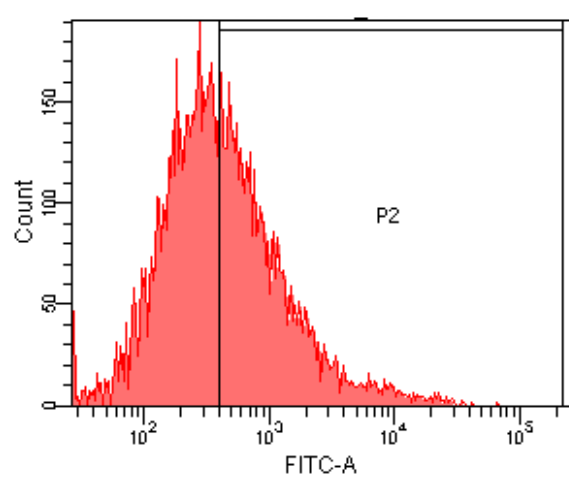

PS HSPs Amilorid

| Population | #Events | %Parent | %Total |
|------------|---------|---------|--------|
| All Events | 37,987  | ####    | 100.0  |
| P1         | 10,274  | 27.0    | 27.0   |
| P2         | 4,907   | 47.8    | 12.9   |

PS HSPs Amilorid

| Population | #Events | %Parent | FITC-A Mean |
|------------|---------|---------|-------------|
| All Events | 37,987  | ####    | 619         |
| P1         | 10,274  | 27.0    | 927         |
| P2         | 4,907   | 47.8    | 1,708       |



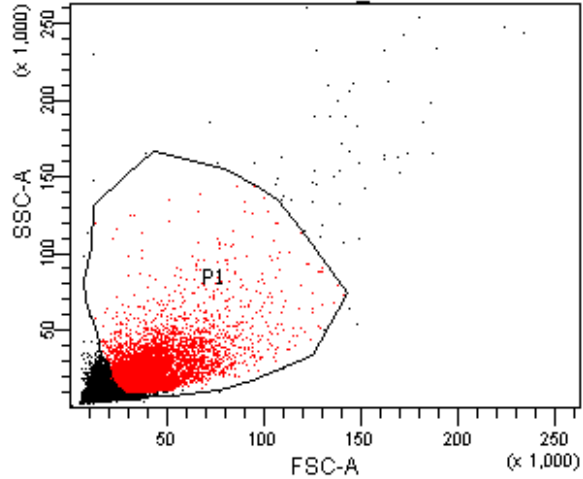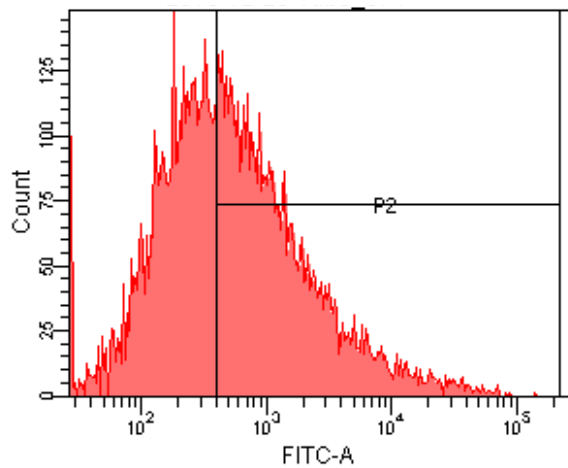

PS HSPs@glucan Amilorid

| Population | #Events | %Parent | %Total |
|------------|---------|---------|--------|
| All Events | 31,984  | ####    | 100.0  |
| P1         | 10,000  | 31.3    | 31.3   |
| P2         | 5,511   | 55.1    | 17.2   |

PS HSPs@glucan Amilorid

| Population | #Events | %Parent | FITC-A Mean |
|------------|---------|---------|-------------|
| All Events | 31,984  | ####    | 1,519       |
| P1         | 10,000  | 31.3    | 1,694       |
| P2         | 5,511   | 55.1    | 2,910       |

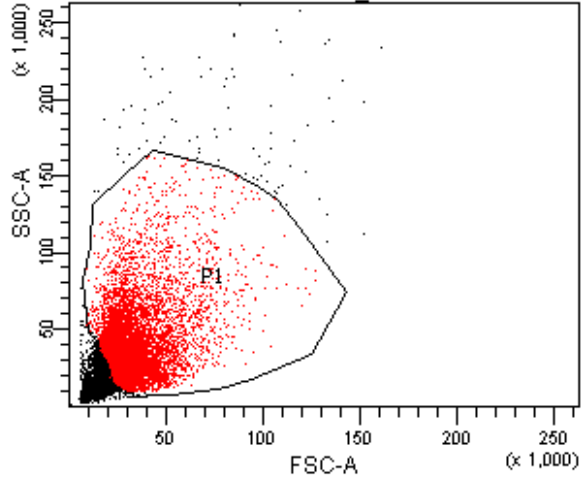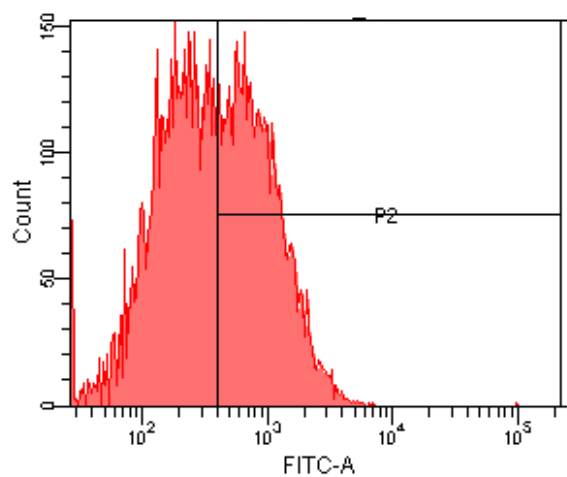

### E. coli HSPs Amilorid

| Population | #Events | %Parent | %Total |
|------------|---------|---------|--------|
| All Events | 21,087  | ####    | 100.0  |
| P1         | 10,000  | 47.4    | 47.4   |
| P2         | 4,752   | 47.5    | 22.5   |

### E. coli HSPs Amilorid

| Population | #Events | %Parent | FITC-A Mean |
|------------|---------|---------|-------------|
| All Events | 21,087  | ####    | 385         |
| P1         | 10,000  | 47.4    | 586         |
| P2         | 4,752   | 47.5    | 1,015       |

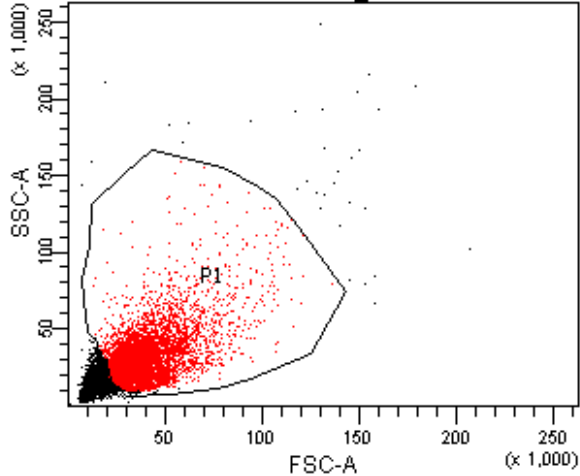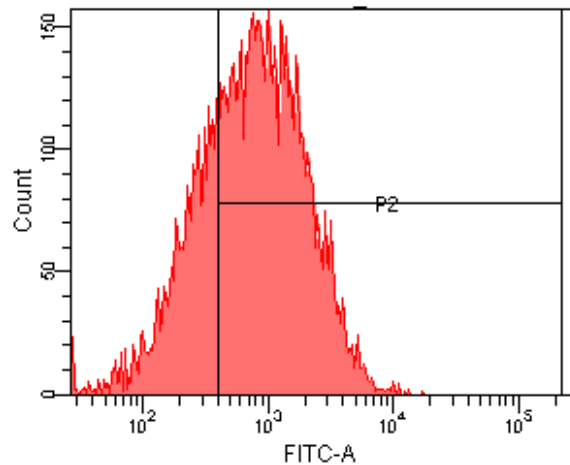

E. coli HSPs@glucan Amilorid

| Population | #Events | %Parent | %Total |
|------------|---------|---------|--------|
| All Events | 23,015  | ####    | 100.0  |
| P1         | 10,000  | 43.4    | 43.4   |
| P2         | 7,309   | 73.1    | 31.8   |

E. coli HSPs@glucan Amilorid

| Population | #Events | %Parent | FITC-A Mean |
|------------|---------|---------|-------------|
| All Events | 23,015  | ####    | 656         |
| P1         | 10,000  | 43.4    | 1,099       |
| P2         | 7,309   | 73.1    | 1,417       |

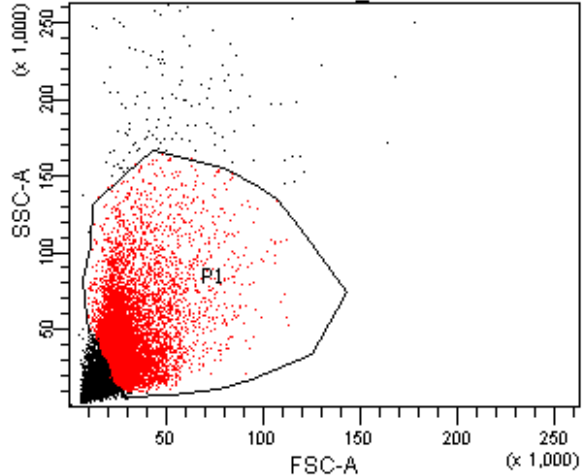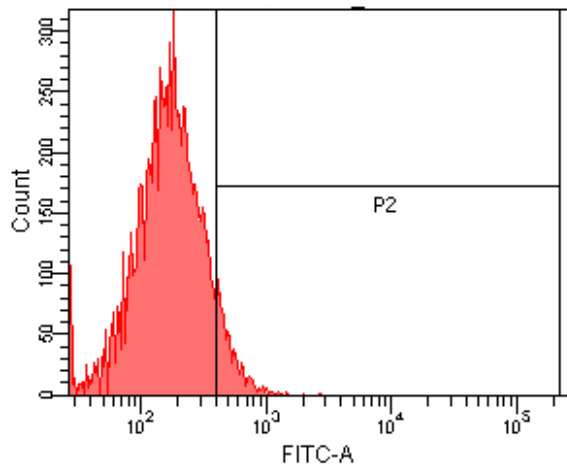

*S. aureus* HSPs Amilorid

| Population | #Events | %Parent | %Total |
|------------|---------|---------|--------|
| All Events | 19,443  | ####    | 100.0  |
| P1         | 10,000  | 51.4    | 51.4   |
| P2         | 801     | 8.0     | 4.1    |

*S. aureus* HSPs Amilorid

| Population | #Events | %Parent | FITC-A Mean |
|------------|---------|---------|-------------|
| All Events | 19,443  | ####    | 152         |
| P1         | 10,000  | 51.4    | 203         |
| P2         | 801     | 8.0     | 544         |

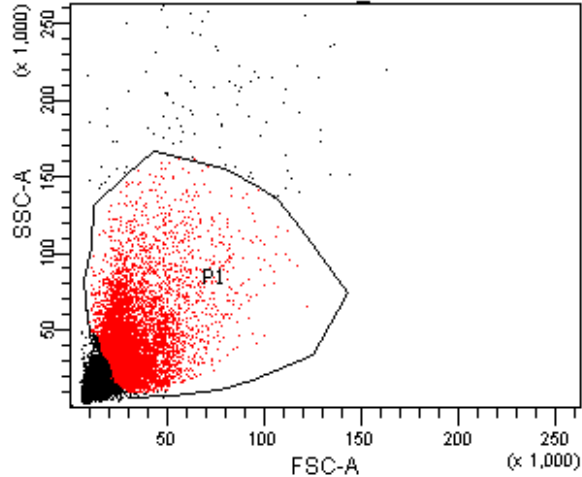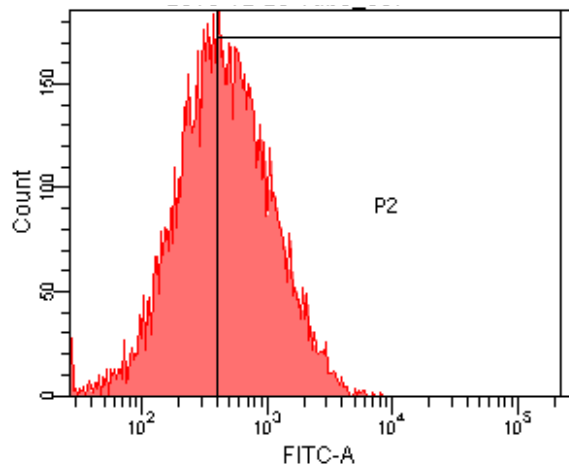

S. aureus HSPs@glucan Amilorid

| Population | #Events | %Parent | %Total |
|------------|---------|---------|--------|
| All Events | 21,736  | ####    | 100.0  |
| P1         | 10,000  | 46.0    | 46.0   |
| P2         | 5,538   | 55.4    | 25.5   |

S. aureus HSPs@glucan Amilorid

| Population | #Events | %Parent | FITC-A Mean |
|------------|---------|---------|-------------|
| All Events | 21,736  | ####    | 413         |
| P1         | 10,000  | 46.0    | 639         |
| P2         | 5,538   | 55.4    | 966         |

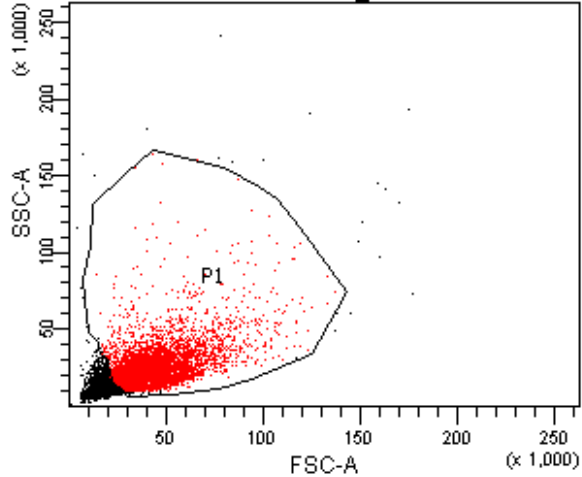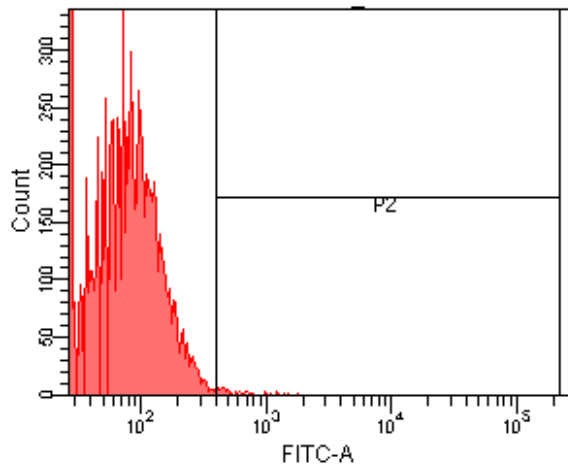

### FITC-OVA Glucan

| Population | #Events | %Parent | %Total |
|------------|---------|---------|--------|
| All Events | 22,711  | ####    | 100.0  |
| P1         | 10,000  | 44.0    | 44.0   |
| P2         | 58      | 0.6     | 0.3    |

### FITC-OVA Glucan

| Population | #Events | %Parent | FITC-A Mean |
|------------|---------|---------|-------------|
| All Events | 22,711  | ####    | 58          |
| P1         | 10,000  | 44.0    | 84          |
| P2         | 58      | 0.6     | 621         |

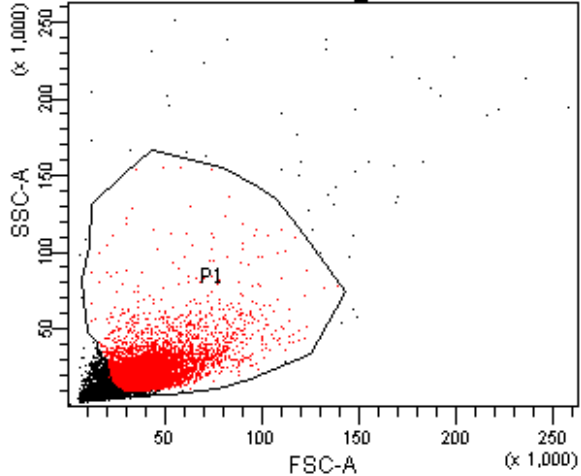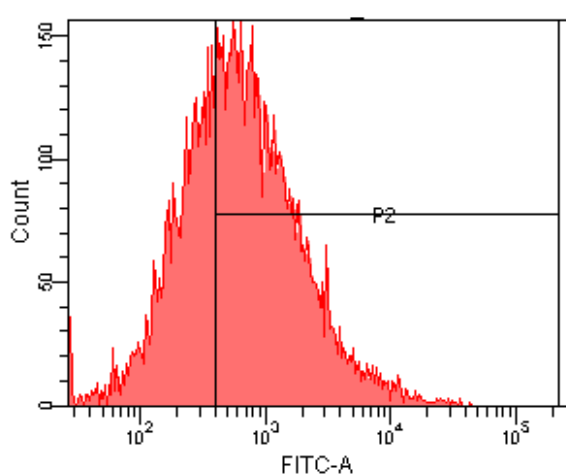

### PS HSPs Glucan

| Population | #Events | %Parent | %Total |
|------------|---------|---------|--------|
| All Events | 25,079  | ####    | 100.0  |
| P1         | 10,000  | 39.9    | 39.9   |
| P2         | 6,562   | 65.6    | 26.2   |

### PS HSPs Glucan

| Population | #Events | %Parent | FITC-A Mean |
|------------|---------|---------|-------------|
| All Events | 25,079  | ####    | 953         |
| P1         | 10,000  | 39.9    | 1,201       |
| P2         | 6,562   | 65.6    | 1,710       |

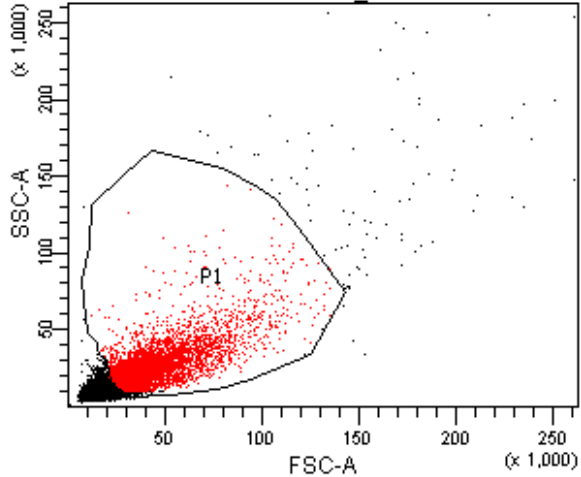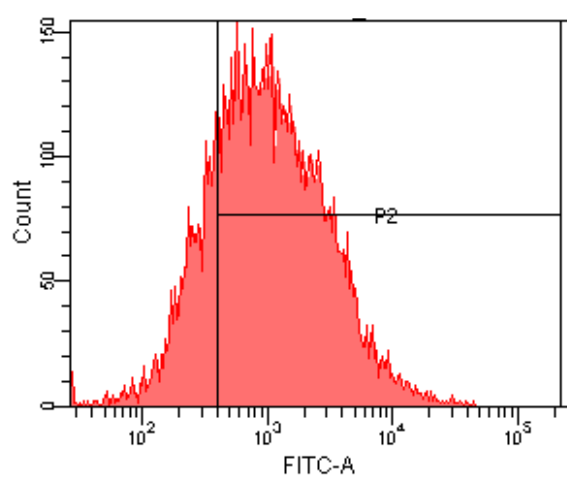

PS HSPs@glucan Glucan

| Population | #Events | %Parent | %Total |
|------------|---------|---------|--------|
| All Events | 27,152  | ####    | 100.0  |
| P1         | 10,000  | 36.8    | 36.8   |
| P2         | 7,991   | 79.9    | 29.4   |

PS HSPs@glucan Glucan

| Population | #Events | %Parent | FITC-A Mean |
|------------|---------|---------|-------------|
| All Events | 27,152  | ####    | 1,210       |
| P1         | 10,000  | 36.8    | 1,780       |
| P2         | 7,991   | 79.9    | 2,163       |



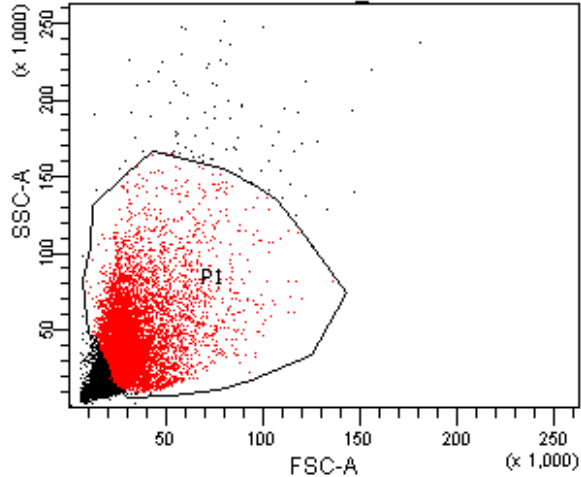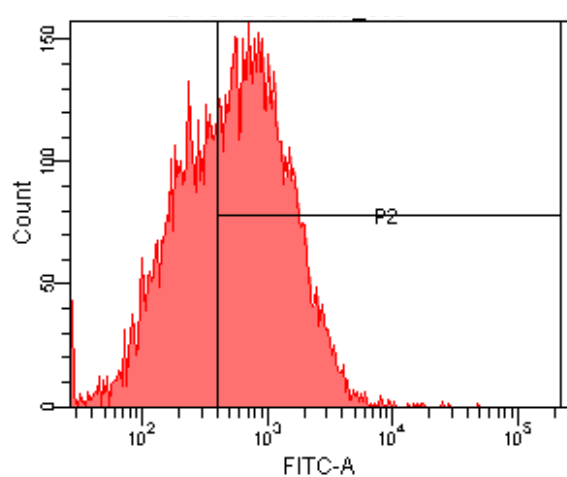

### E. coli HSPs Glucan

| Population | #Events | %Parent | %Total |
|------------|---------|---------|--------|
| All Events | 15,414  | ####    | 100.0  |
| P1         | 10,000  | 64.9    | 64.9   |
| P2         | 6,153   | 61.5    | 39.9   |

### E. coli HSPs Glucan

| Population | #Events | %Parent | FITC-A Mean |
|------------|---------|---------|-------------|
| All Events | 15,414  | ####    | 672         |
| P1         | 10,000  | 64.9    | 827         |
| P2         | 6,153   | 61.5    | 1,211       |

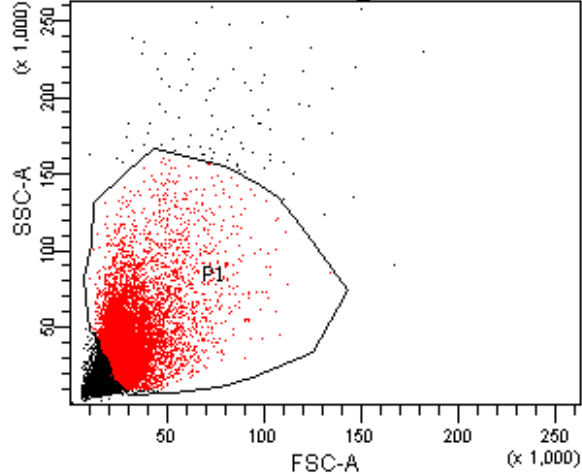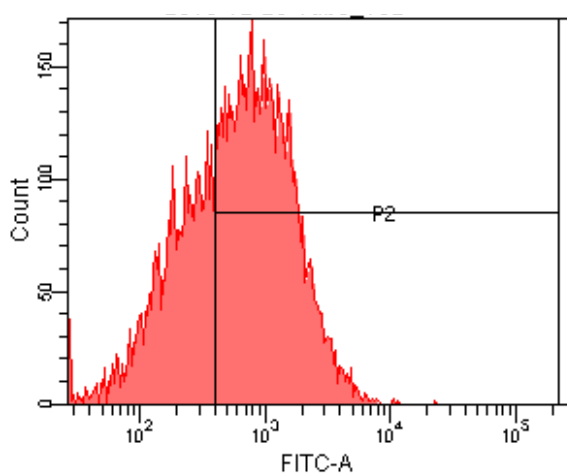

E. coli HSPs@glucan Glucan

| Population | #Events | %Parent | %Total |
|------------|---------|---------|--------|
| All Events | 18,403  | ####    | 100.0  |
| P1         | 10,000  | 54.3    | 54.3   |
| P2         | 6,642   | 66.4    | 36.1   |

E. coli HSPs@glucan Glucan

| Population | #Events | %Parent | FITC-A Mean |
|------------|---------|---------|-------------|
| All Events | 18,403  | ####    | 628         |
| P1         | 10,000  | 54.3    | 888         |
| P2         | 6,642   | 66.4    | 1,230       |

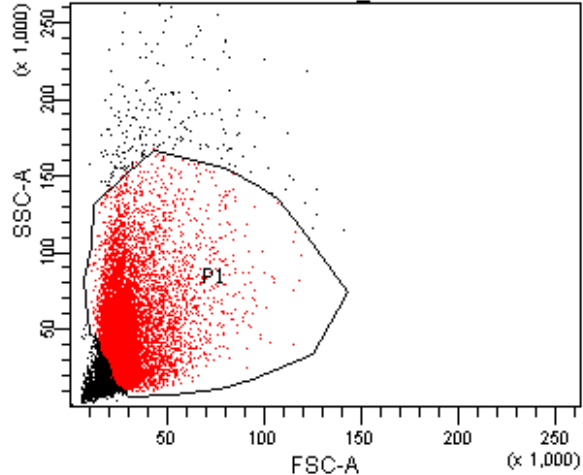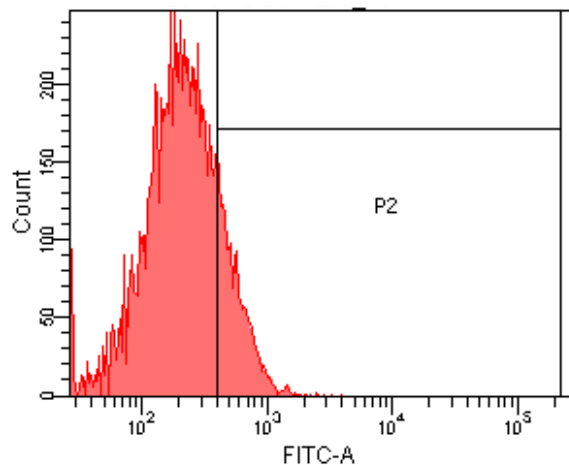

S. aureus HSPs Glucan

| Population | #Events | %Parent | %Total |
|------------|---------|---------|--------|
| All Events | 14,684  | ####    | 100.0  |
| P1         | 10,000  | 68.1    | 68.1   |
| P2         | 1,842   | 18.4    | 12.5   |

S. aureus HSPs Glucan

| Population | #Events | %Parent | FITC-A Mean |
|------------|---------|---------|-------------|
| All Events | 14,684  | ####    | 231         |
| P1         | 10,000  | 68.1    | 267         |
| P2         | 1,842   | 18.4    | 596         |

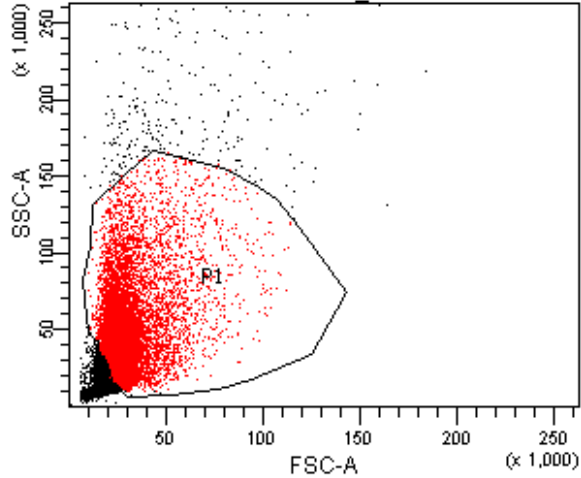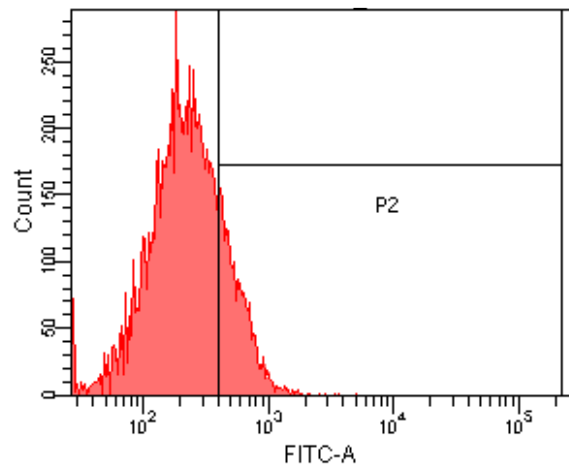

S. aureus HSPs@glucan Glucan

| Population | #Events | %Parent | %Total |
|------------|---------|---------|--------|
| All Events | 14,169  | ####    | 100.0  |
| P1         | 10,000  | 70.6    | 70.6   |
| P2         | 2,025   | 20.2    | 14.3   |

S. aureus HSPs@glucan Glucan

| Population | #Events | %Parent | FITC-A Mean |
|------------|---------|---------|-------------|
| All Events | 14,169  | ####    | 247         |
| P1         | 10,000  | 70.6    | 279         |
| P2         | 2,025   | 20.2    | 597         |
