# Supplementary material for: Antigen uptake and immunoadjuvant activity of pathogen-mimetic hollow silica particles conjugated with β-glucan
Source: Royal Society of Chemistry journal article supplement (doi:10.1039/c8tb02129e), 2018-01-01
Supplement: c8tb02129e6.pdf [file c8tb02129e6.pdf]

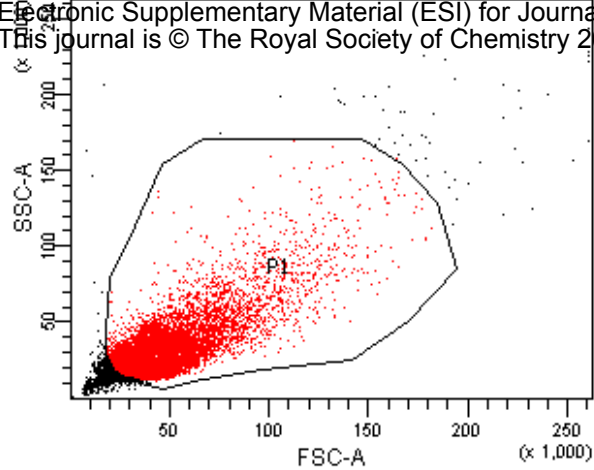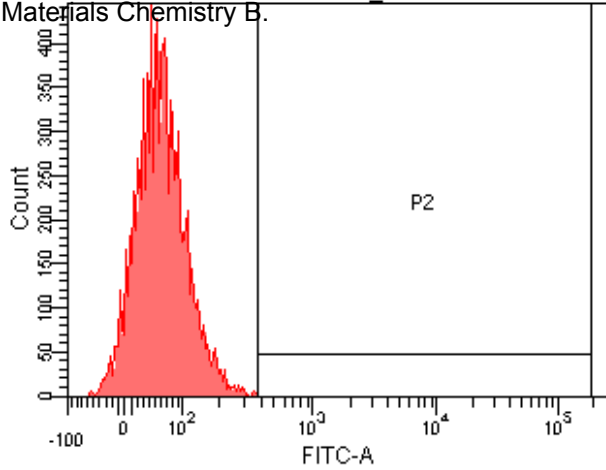

| Blank        |         |         |        |
|--------------|---------|---------|--------|
| Population   | #Events | %Parent | %Total |
| ■ All Events | 11,924  | ####    | 100.0  |
| ■ P1         | 10,000  | 83.9    | 83.9   |
| ☒ P2         | 0       | 0.0     | 0.0    |

| Blank        |         |         |  | FITC-A |
|--------------|---------|---------|--|--------|
| Population   | #Events | %Parent |  | Mean   |
| ■ All Events | 11,924  | ####    |  | 57     |
| ■ P1         | 10,000  | 83.9    |  | 61     |
| ☒ P2         | 0       | 0.0     |  | ####   |

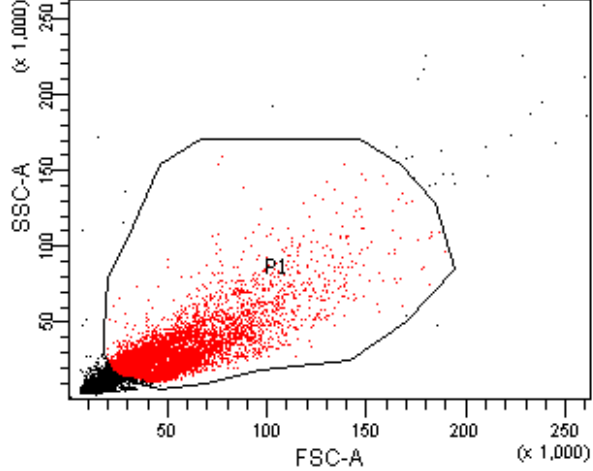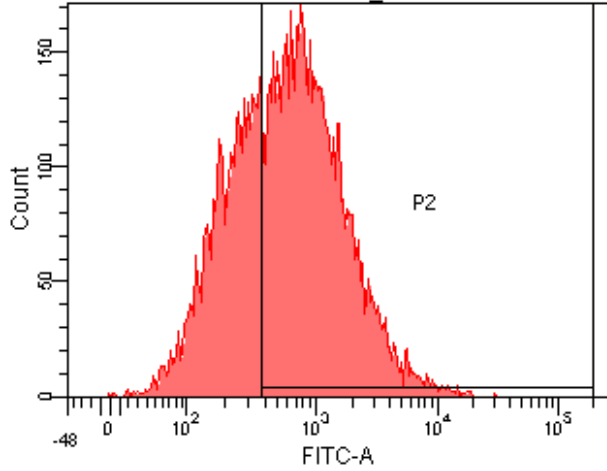

### PS HSPs Isotype

| Population | #Events | %Parent | %Total |
|------------|---------|---------|--------|
| All Events | 15,098  | ####    | 100.0  |
| P1         | 10,000  | 66.2    | 66.2   |
| P2         | 6,406   | 64.1    | 42.4   |

### PS HSPs Isotype

| Population | #Events | %Parent | FITC-A Mean |
|------------|---------|---------|-------------|
| All Events | 15,098  | ####    | 792         |
| P1         | 10,000  | 66.2    | 968         |
| P2         | 6,406   | 64.1    | 1,386       |

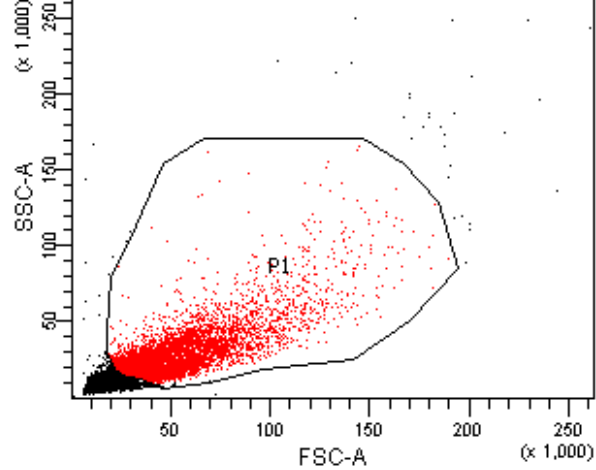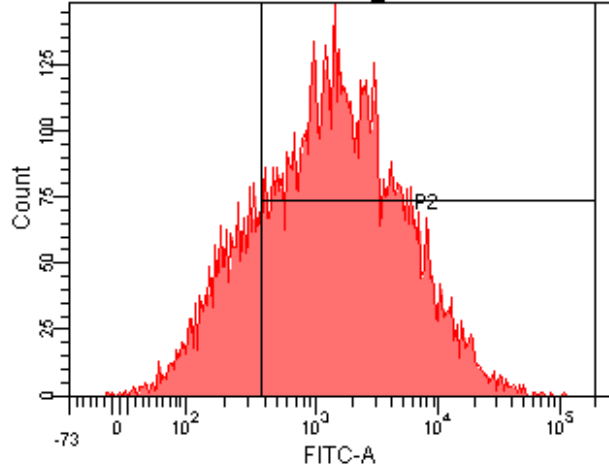

PS HSPs@glucan Isotype

| Population | #Events | %Parent | %Total |
|------------|---------|---------|--------|
| All Events | 19,495  | ####    | 100.0  |
| P1         | 10,000  | 51.3    | 51.3   |
| P2         | 7,989   | 79.9    | 41.0   |

PS HSPs@glucan Isotype

| Population | #Events | %Parent | FITC-A Mean |
|------------|---------|---------|-------------|
| All Events | 19,495  | ####    | 2,504       |
| P1         | 10,000  | 51.3    | 2,840       |
| P2         | 7,989   | 79.9    | 3,500       |

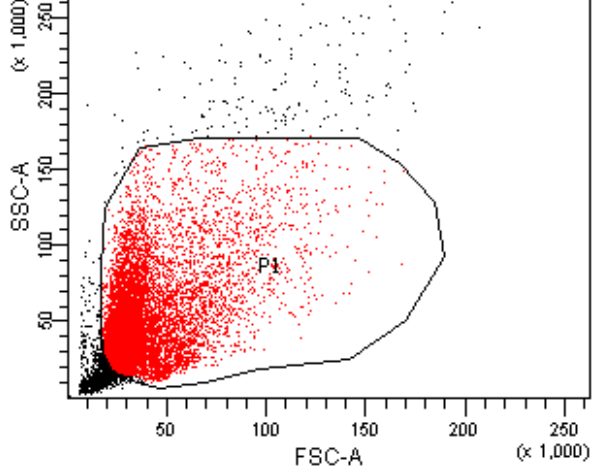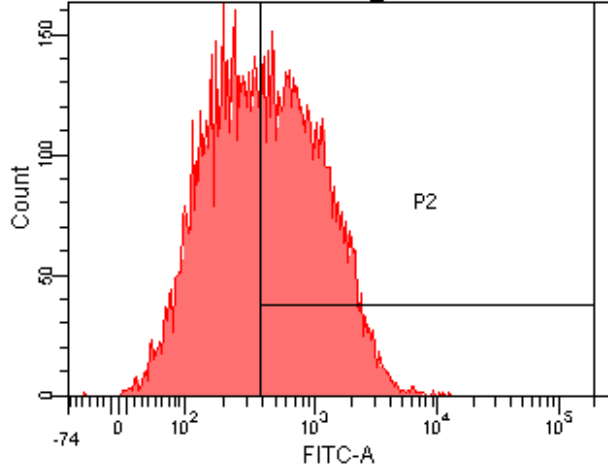

### E. coli HSPs Isotype

| Population | #Events | %Parent | %Total |
|------------|---------|---------|--------|
| All Events | 12,645  | ####    | 100.0  |
| P1         | 10,000  | 79.1    | 79.1   |
| P2         | 5,103   | 51.0    | 40.4   |

### E. coli HSPs Isotype

| Population | #Events | %Parent | FITC-A Mean |
|------------|---------|---------|-------------|
| All Events | 12,645  | ####    | 586         |
| P1         | 10,000  | 79.1    | 640         |
| P2         | 5,103   | 51.0    | 1,062       |

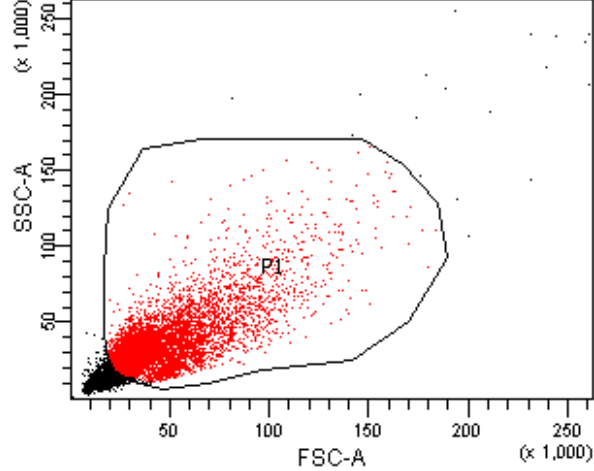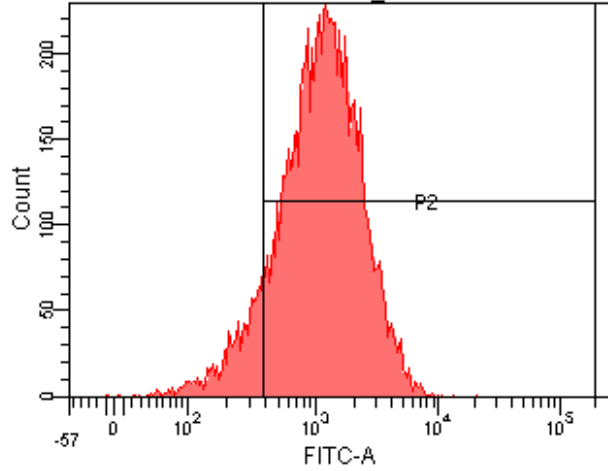

E. coli HSPs@glucan Isotype

| Population   | #Events | %Parent | %Total |
|--------------|---------|---------|--------|
| ■ All Events | 15,471  | ####    | 100.0  |
| ■ P1         | 10,000  | 64.6    | 64.6   |
| ⊠ P2         | 8,913   | 89.1    | 57.6   |

E. coli HSPs@glucan Isotype

| Population   | #Events | %Parent | FITC-A Mean |
|--------------|---------|---------|-------------|
| ■ All Events | 15,471  | ####    | 1,015       |
| ■ P1         | 10,000  | 64.6    | 1,328       |
| ⊠ P2         | 8,913   | 89.1    | 1,459       |

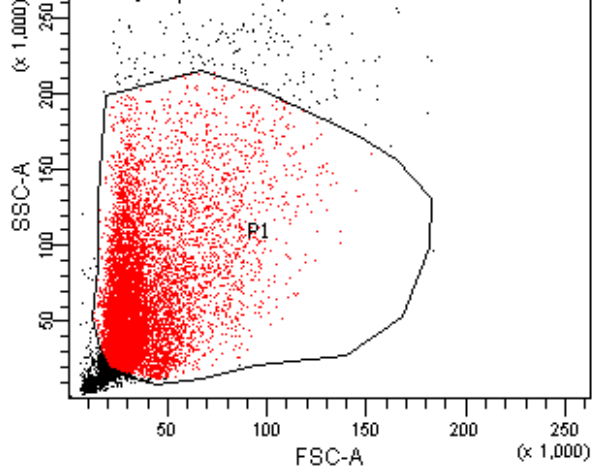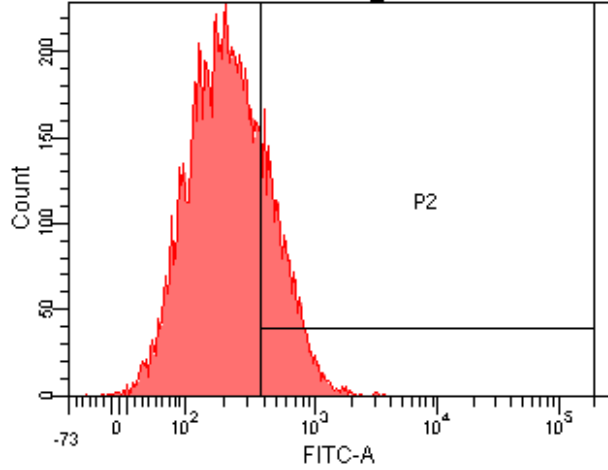

### S. aureus HSPs Isotype

| Population   | #Events | %Parent | %Total |
|--------------|---------|---------|--------|
| ■ All Events | 12,053  | ####    | 100.0  |
| ■ P1         | 10,000  | 83.0    | 83.0   |
| ⊠ P2         | 2,097   | 21.0    | 17.4   |

### S. aureus HSPs Isotype

| Population   | #Events | %Parent | FITC-A Mean |
|--------------|---------|---------|-------------|
| ■ All Events | 12,053  | ####    | 272         |
| ■ P1         | 10,000  | 83.0    | 274         |
| ⊠ P2         | 2,097   | 21.0    | 602         |

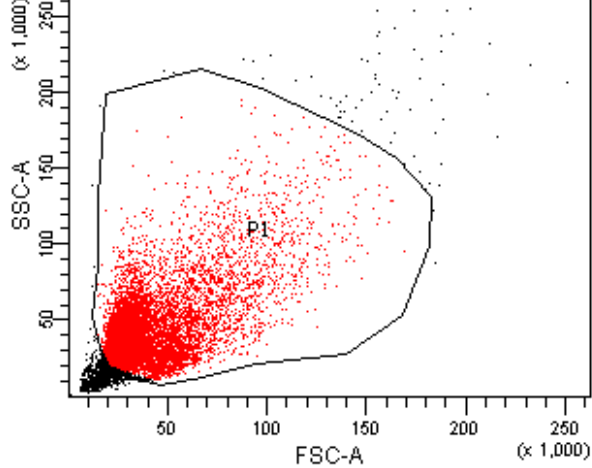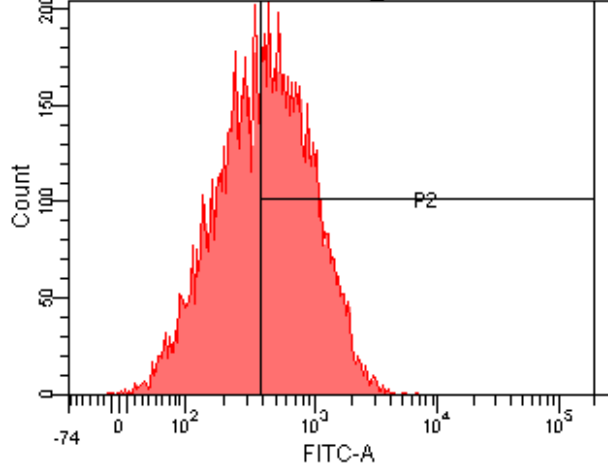

S. aureus HSPs@glucan Isotype

| Population | #Events | %Parent | %Total |
|------------|---------|---------|--------|
| All Events | 12,816  | ###     | 100.0  |
| P1         | 10,000  | 78.0    | 78.0   |
| P2         | 5,283   | 52.8    | 41.2   |

S. aureus HSPs@glucan Isotype

| Population | #Events | %Parent | FITC-A Mean |
|------------|---------|---------|-------------|
| All Events | 12,816  | ###     | 481         |
| P1         | 10,000  | 78.0    | 549         |
| P2         | 5,283   | 52.8    | 843         |

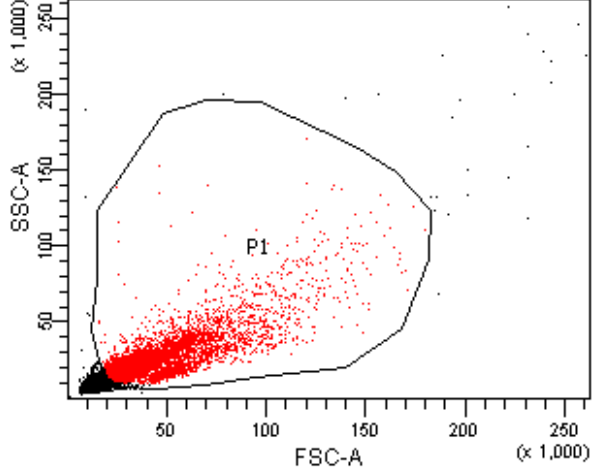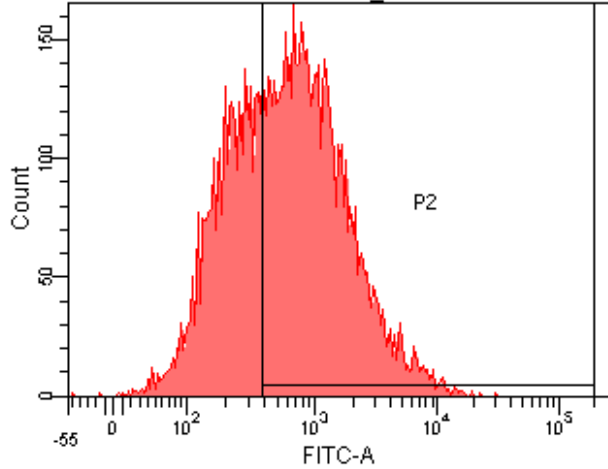

PS HSPs anti-TLR2 mAb

| Population | #Events | %Parent | %Total |
|------------|---------|---------|--------|
| All Events | 14,386  | ####    | 100.0  |
| P1         | 10,000  | 69.5    | 69.5   |
| P2         | 6,338   | 63.4    | 44.1   |

PS HSPs anti-TLR2 mAb

| Population | #Events | %Parent | FITC-A Mean |
|------------|---------|---------|-------------|
| All Events | 14,386  | ####    | 834         |
| P1         | 10,000  | 69.5    | 1,006       |
| P2         | 6,338   | 63.4    | 1,459       |



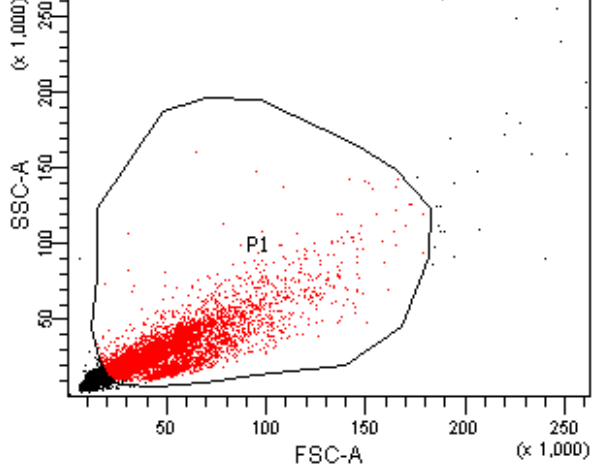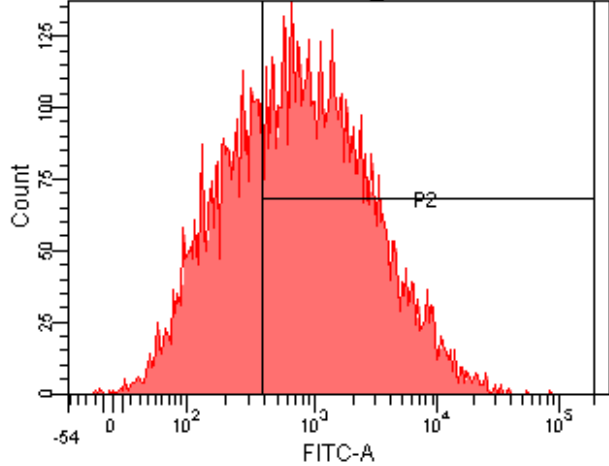

PS HSPs@glucan anti-TLR2 mAb

| Population   | #Events | %Parent | %Total |
|--------------|---------|---------|--------|
| ■ All Events | 12,922  | ####    | 100.0  |
| ■ P1         | 10,000  | 77.4    | 77.4   |
| ⊠ P2         | 6,653   | 66.5    | 51.5   |

PS HSPs@glucan anti-TLR2 mAb

| Population   | #Events | %Parent | FITC-A Mean |
|--------------|---------|---------|-------------|
| ■ All Events | 12,922  | ####    | 1,461       |
| ■ P1         | 10,000  | 77.4    | 1,634       |
| ⊠ P2         | 6,653   | 66.5    | 2,354       |

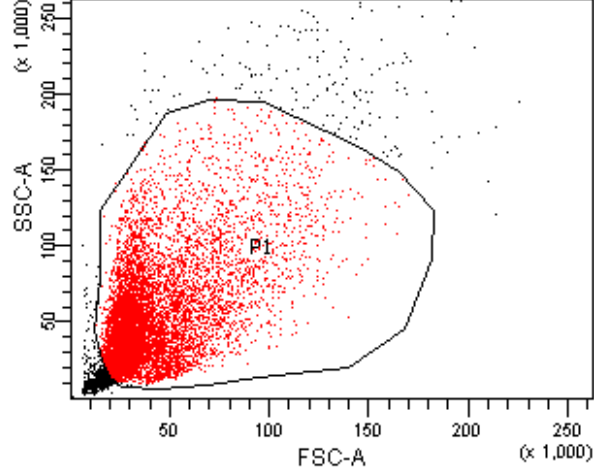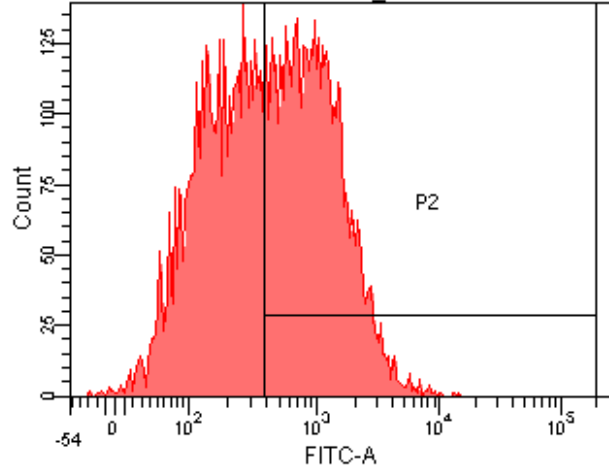

E. coli HSPs anti-TLR2 mAb

| Population   | #Events | %Parent | %Total |
|--------------|---------|---------|--------|
| ■ All Events | 11,477  | ####    | 100.0  |
| ■ P1         | 10,000  | 87.1    | 87.1   |
| ⊠ P2         | 5,204   | 52.0    | 45.3   |

E. coli HSPs anti-TLR2 mAb

| Population   | #Events | %Parent | FITC-A Mean |
|--------------|---------|---------|-------------|
| ■ All Events | 11,477  | ####    | 694         |
| ■ P1         | 10,000  | 87.1    | 690         |
| ⊠ P2         | 5,204   | 52.0    | 1,155       |

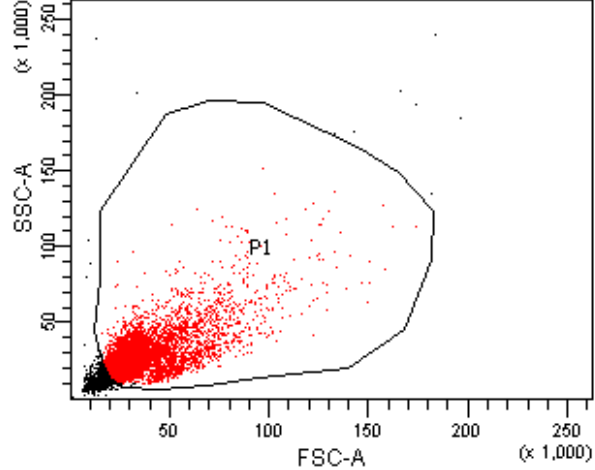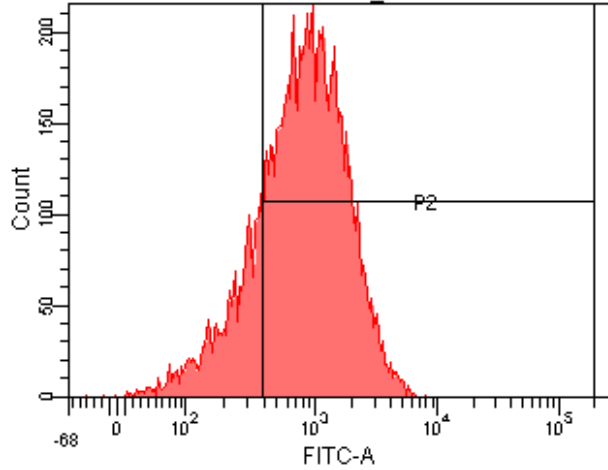

E. coli HSPs@glucan anti-TLR2 mAb

| Population | #Events | %Parent | %Total |
|------------|---------|---------|--------|
| All Events | 13,282  | ####    | 100.0  |
| P1         | 10,000  | 75.3    | 75.3   |
| P2         | 8,023   | 80.2    | 60.4   |

E. coli HSPs@glucan anti-TLR2 mAb

| Population | #Events | %Parent | FITC-A Mean |
|------------|---------|---------|-------------|
| All Events | 13,282  | ####    | 828         |
| P1         | 10,000  | 75.3    | 995         |
| P2         | 8,023   | 80.2    | 1,182       |

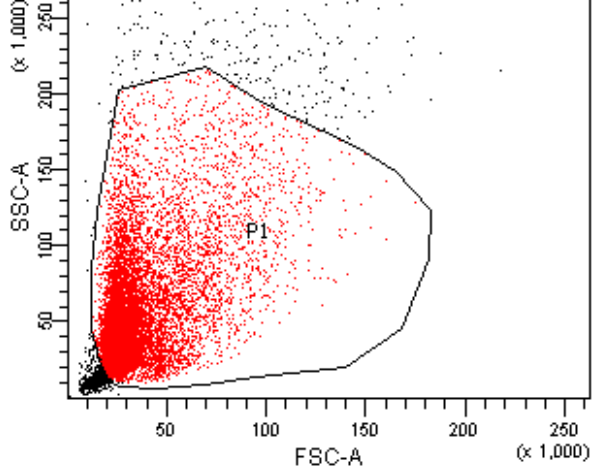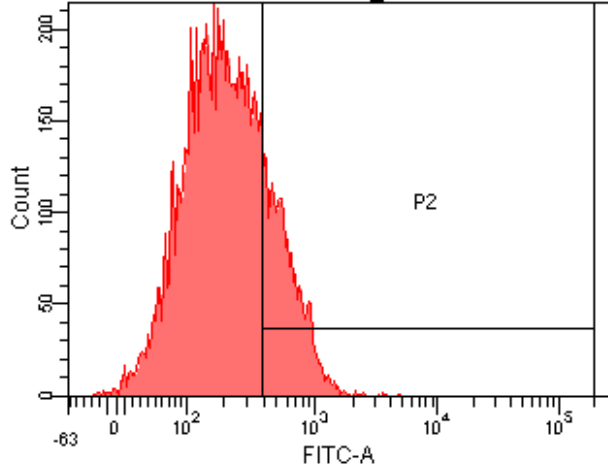

S. aureus HSPs anti-TLR2 mAb

| Population   | #Events | %Parent | %Total |
|--------------|---------|---------|--------|
| ■ All Events | 11,333  | ####    | 100.0  |
| ■ P1         | 10,000  | 88.2    | 88.2   |
| ☒ P2         | 2,101   | 21.0    | 18.5   |

S. aureus HSPs anti-TLR2 mAb

| Population   | #Events | %Parent | FITC-A Mean |
|--------------|---------|---------|-------------|
| ■ All Events | 11,333  | ####    | 293         |
| ■ P1         | 10,000  | 88.2    | 273         |
| ☒ P2         | 2,101   | 21.0    | 626         |

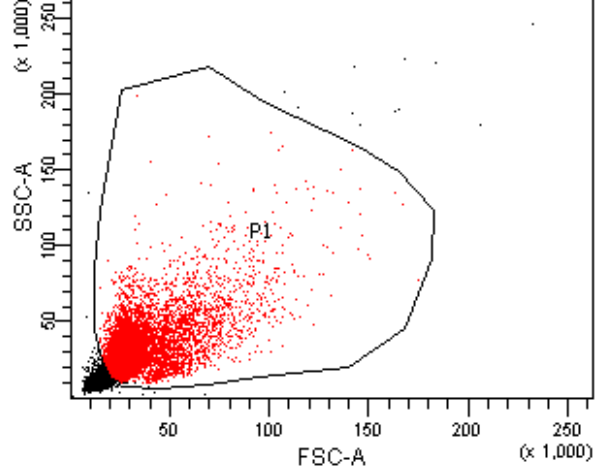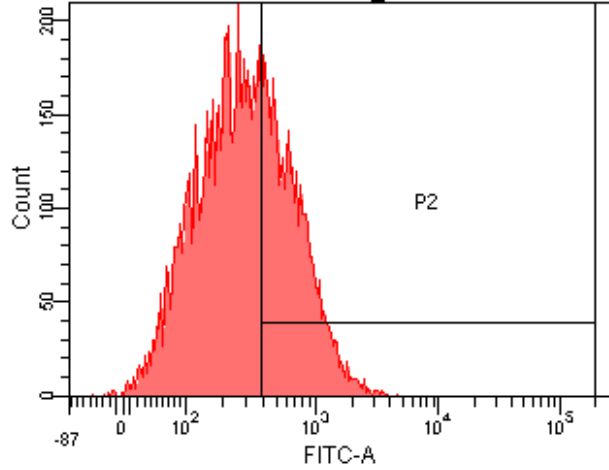

S. aureus HSPs@glucan anti-TLR2 mAb

| Population | #Events | %Parent | %Total |
|------------|---------|---------|--------|
| All Events | 12,216  | ####    | 100.0  |
| P1         | 10,000  | 81.9    | 81.9   |
| P2         | 3,657   | 36.6    | 29.9   |

S. aureus HSPs@glucan anti-TLR2 mAb

| Population | #Events | %Parent | FITC-A Mean |
|------------|---------|---------|-------------|
| All Events | 12,216  | ####    | 348         |
| P1         | 10,000  | 81.9    | 390         |
| P2         | 3,657   | 36.6    | 725         |

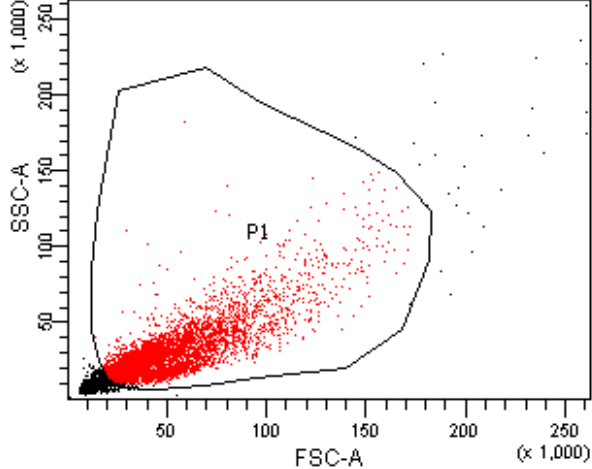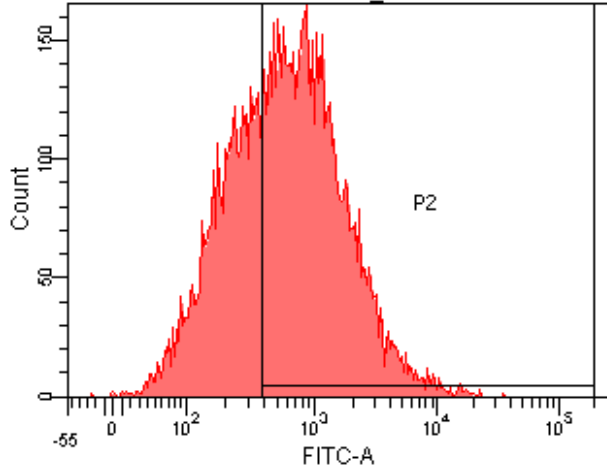

### PS HSPs Isotype

| Population | #Events | %Parent | %Total |
|------------|---------|---------|--------|
| All Events | 12,527  | ####    | 100.0  |
| P1         | 10,000  | 79.8    | 79.8   |
| P2         | 6,419   | 64.2    | 51.2   |

### PS HSPs Isotype

| Population | #Events | %Parent | FITC-A Mean |
|------------|---------|---------|-------------|
| All Events | 12,527  | ####    | 878         |
| P1         | 10,000  | 79.8    | 976         |
| P2         | 6,419   | 64.2    | 1,400       |

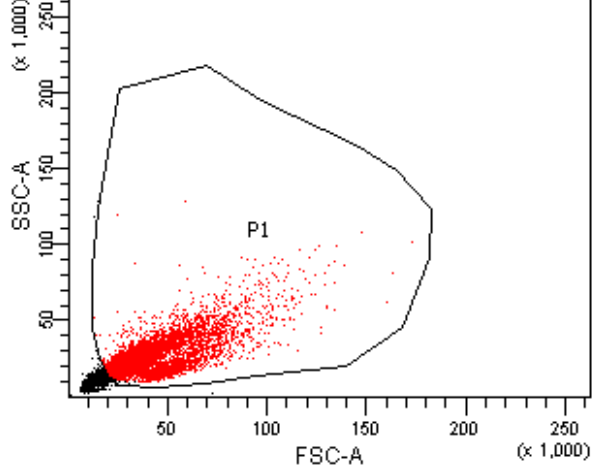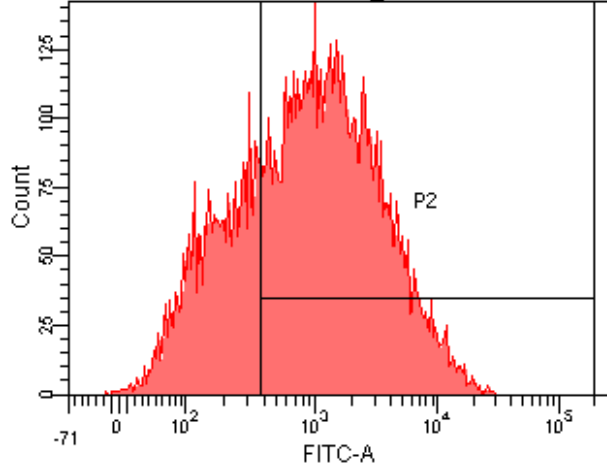

PS HSPs@glucan Isotype

| Population | #Events | %Parent | %Total |
|------------|---------|---------|--------|
| All Events | 12,311  | ####    | 100.0  |
| P1         | 10,000  | 81.2    | 81.2   |
| P2         | 7,132   | 71.3    | 57.9   |

PS HSPs@glucan Isotype

| Population | #Events | %Parent | FITC-A Mean |
|------------|---------|---------|-------------|
| All Events | 12,311  | ####    | 1,588       |
| P1         | 10,000  | 81.2    | 1,753       |
| P2         | 7,132   | 71.3    | 2,378       |

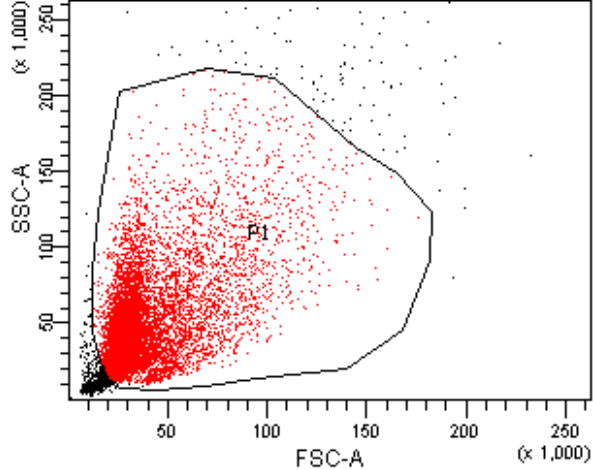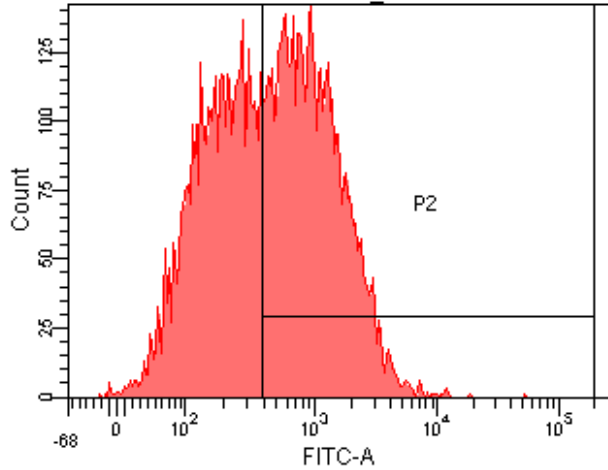

### E. coli HSPs Isotype

| Population   | #Events | %Parent | %Total |
|--------------|---------|---------|--------|
| ■ All Events | 11,437  | ####    | 100.0  |
| ■ P1         | 10,000  | 87.4    | 87.4   |
| ⊠ P2         | 5,453   | 54.5    | 47.7   |

### E. coli HSPs Isotype

| Population   | #Events | %Parent | FITC-A Mean |
|--------------|---------|---------|-------------|
| ■ All Events | 11,437  | ####    | 707         |
| ■ P1         | 10,000  | 87.4    | 739         |
| ⊠ P2         | 5,453   | 54.5    | 1,196       |



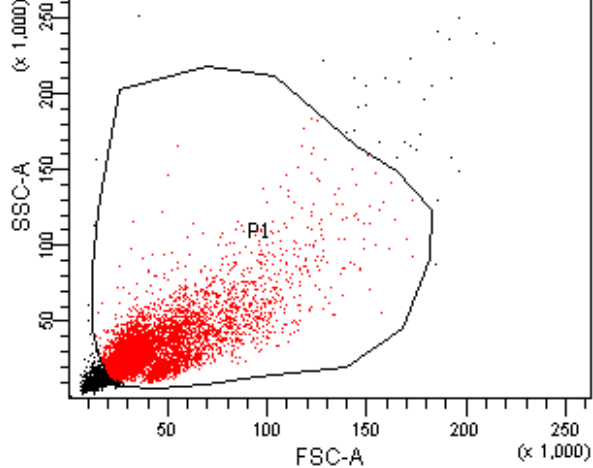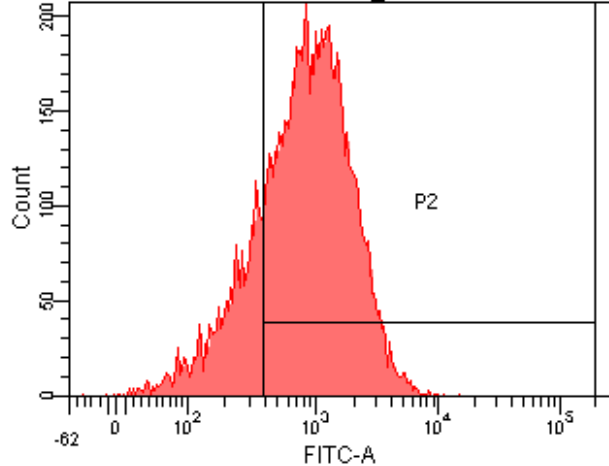

E. coli HSPs@glucan Isotype

| Population   | #Events | %Parent | %Total |
|--------------|---------|---------|--------|
| ■ All Events | 12,132  | ####    | 100.0  |
| ■ P1         | 10,000  | 82.4    | 82.4   |
| ☒ P2         | 7,951   | 79.5    | 65.5   |

E. coli HSPs@glucan Isotype

| Population   | #Events | %Parent | FITC-A Mean |
|--------------|---------|---------|-------------|
| ■ All Events | 12,132  | ####    | 942         |
| ■ P1         | 10,000  | 82.4    | 1,056       |
| ☒ P2         | 7,951   | 79.5    | 1,269       |

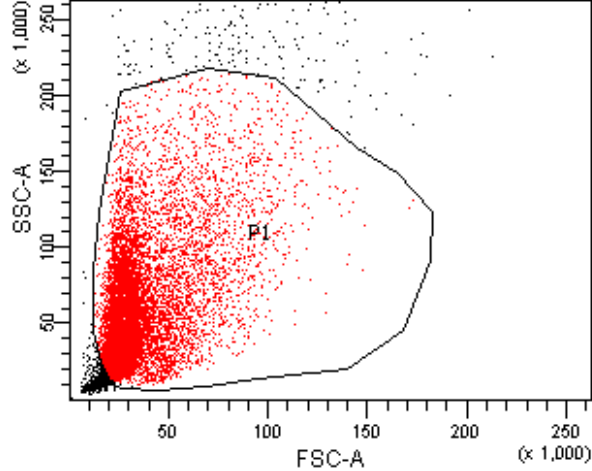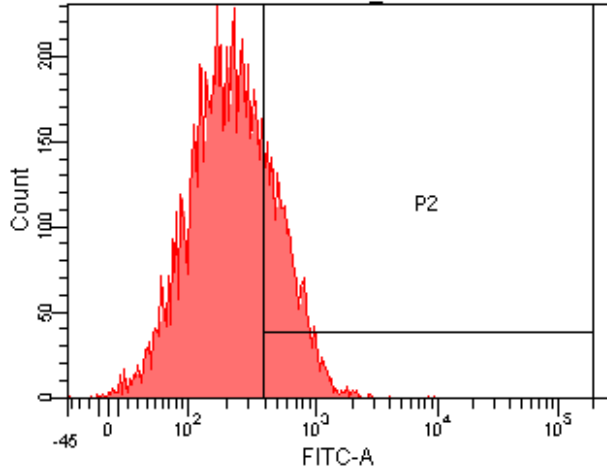

### S. aureus HSPs Isotype

| Population | #Events | %Parent | %Total |
|------------|---------|---------|--------|
| All Events | 11,212  | ####    | 100.0  |
| P1         | 10,000  | 89.2    | 89.2   |
| P2         | 2,390   | 23.9    | 21.3   |

### S. aureus HSPs Isotype

| Population | #Events | %Parent | FITC-A Mean |
|------------|---------|---------|-------------|
| All Events | 11,212  | ####    | 312         |
| P1         | 10,000  | 89.2    | 293         |
| P2         | 2,390   | 23.9    | 636         |

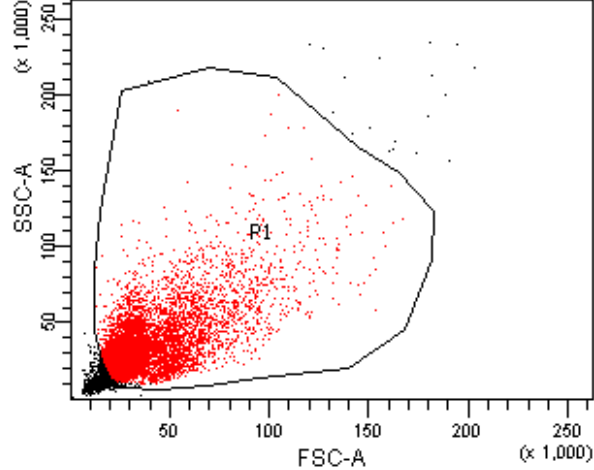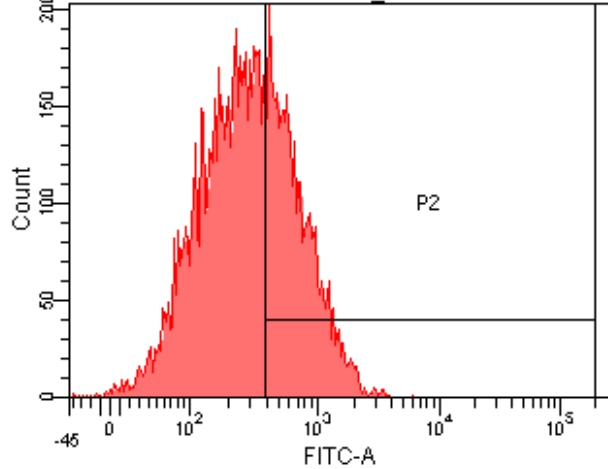

S. aureus HSPs@glucan Isotype

| Population   | #Events | %Parent | %Total |
|--------------|---------|---------|--------|
| ■ All Events | 12,129  | ####    | 100.0  |
| ■ P1         | 10,000  | 82.4    | 82.4   |
| ⊠ P2         | 3,758   | 37.6    | 31.0   |

S. aureus HSPs@glucan Isotype

| Population   | #Events | %Parent | FITC-A Mean |
|--------------|---------|---------|-------------|
| ■ All Events | 12,129  | ####    | 360         |
| ■ P1         | 10,000  | 82.4    | 403         |
| ⊠ P2         | 3,758   | 37.6    | 749         |

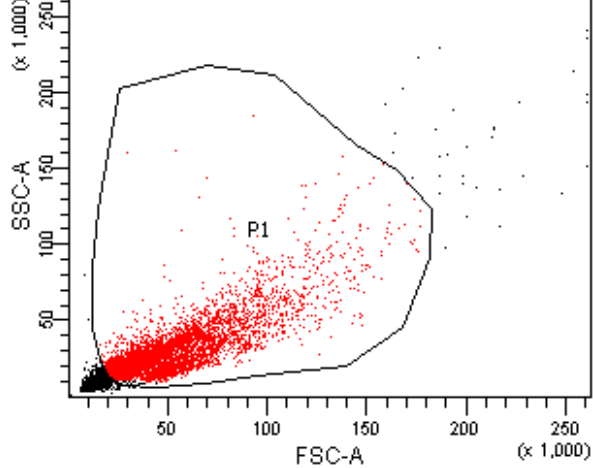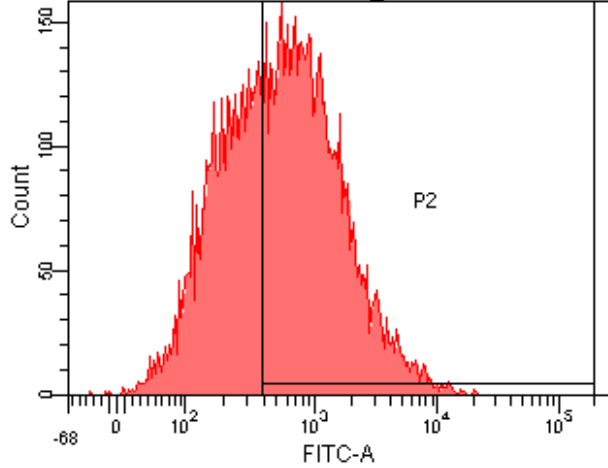

PS HSPs anti-dectin-1 mAb

| Population   | #Events | %Parent | %Total |
|--------------|---------|---------|--------|
| ■ All Events | 12,678  | ####    | 100.0  |
| ■ P1         | 10,000  | 78.9    | 78.9   |
| ⊠ P2         | 6,073   | 60.7    | 47.9   |

PS HSPs anti-dectin-1 mAb

| Population   | #Events | %Parent | FITC-A Mean |
|--------------|---------|---------|-------------|
| ■ All Events | 12,678  | ####    | 817         |
| ■ P1         | 10,000  | 78.9    | 912         |
| ⊠ P2         | 6,073   | 60.7    | 1,364       |

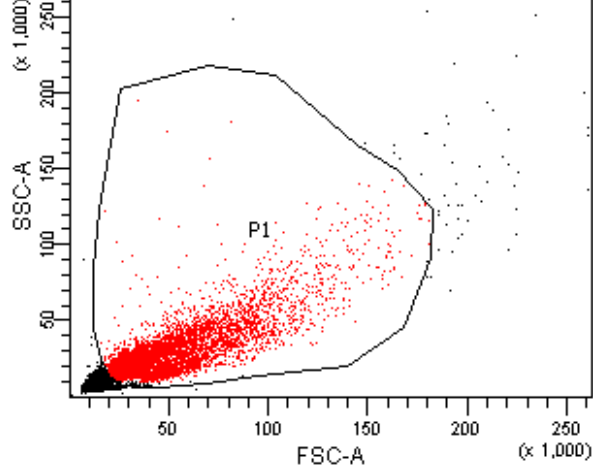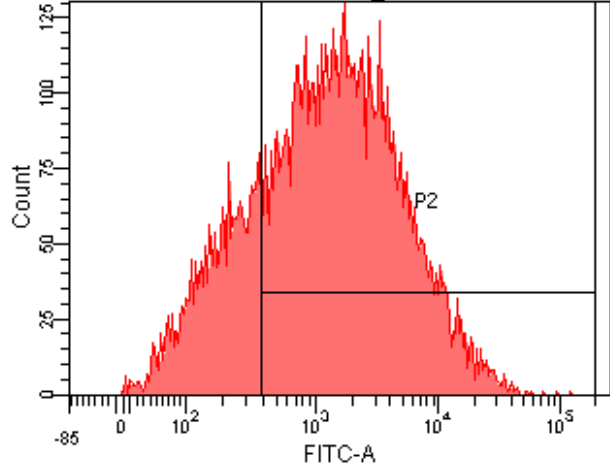

PS HSPs@glucan anti-dectin-1 mAb

| Population | #Events | %Parent | %Total |
|------------|---------|---------|--------|
| All Events | 12,632  | ####    | 100.0  |
| P1         | 10,000  | 79.2    | 79.2   |
| P2         | 7,752   | 77.5    | 61.4   |

PS HSPs@glucan anti-dectin-1 mAb

| Population | #Events | %Parent | FITC-A Mean |
|------------|---------|---------|-------------|
| All Events | 12,632  | ####    | 2,584       |
| P1         | 10,000  | 79.2    | 2,647       |
| P2         | 7,752   | 77.5    | 3,356       |

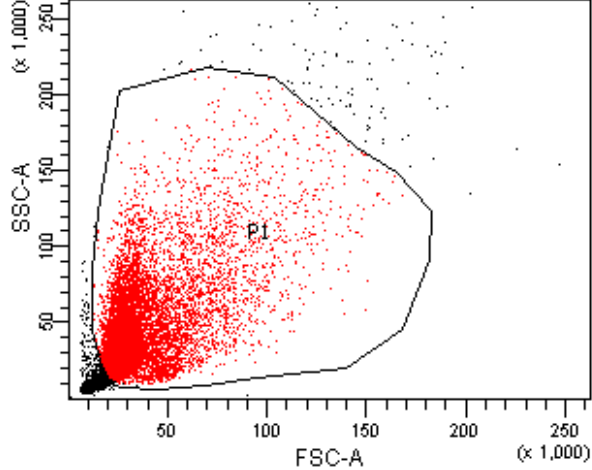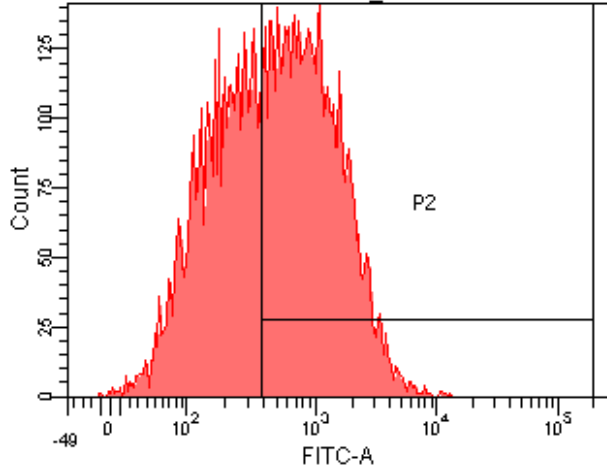

E. coli HSPs anti-dectin-1 mAb

| Population   | #Events | %Parent | %Total |
|--------------|---------|---------|--------|
| ■ All Events | 11,556  | ####    | 100.0  |
| ■ P1         | 10,000  | 86.5    | 86.5   |
| ⊠ P2         | 5,660   | 56.6    | 49.0   |

E. coli HSPs anti-dectin-1 mAb

| Population   | #Events | %Parent | FITC-A Mean |
|--------------|---------|---------|-------------|
| ■ All Events | 11,556  | ####    | 728         |
| ■ P1         | 10,000  | 86.5    | 759         |
| ⊠ P2         | 5,660   | 56.6    | 1,191       |

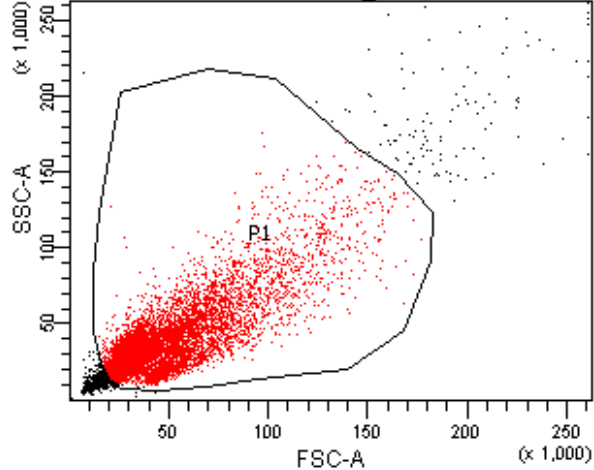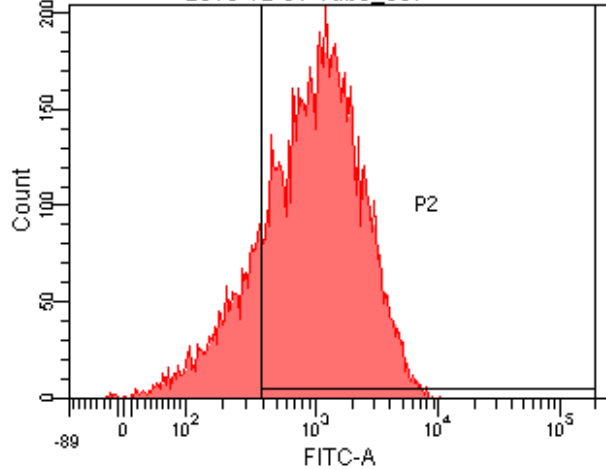

E. coli HSPs@glucan anti-dectin-1 mAb

| Population   | #Events | %Parent | %Total |
|--------------|---------|---------|--------|
| ■ All Events | 11,265  | ####    | 100.0  |
| ■ P1         | 10,000  | 88.8    | 88.8   |
| ⊠ P2         | 8,181   | 81.8    | 72.6   |

E. coli HSPs@glucan anti-dectin-1 mAb

| Population   | #Events | %Parent | FITC-A Mean |
|--------------|---------|---------|-------------|
| ■ All Events | 11,265  | ####    | 1,226       |
| ■ P1         | 10,000  | 88.8    | 1,259       |
| ⊠ P2         | 8,181   | 81.8    | 1,488       |

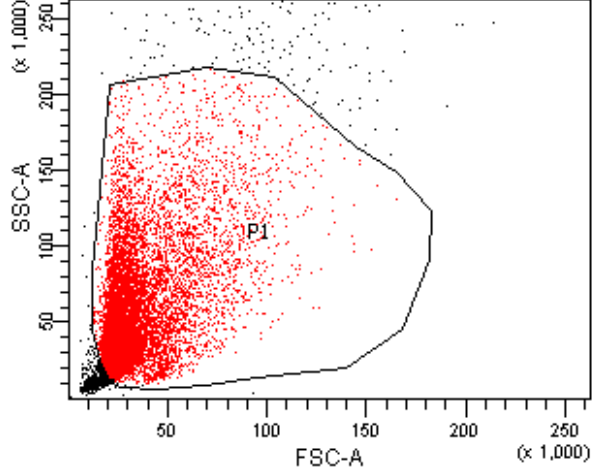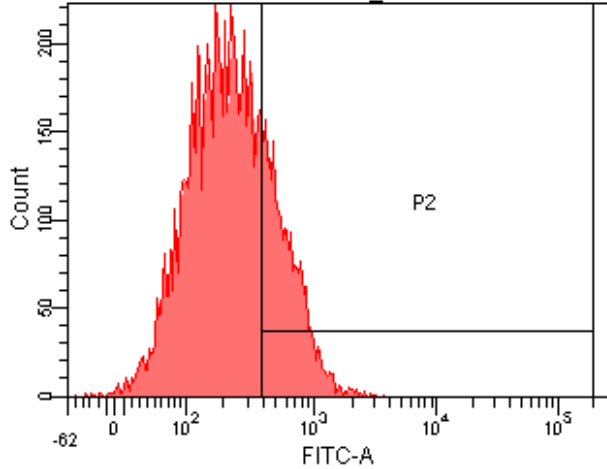

S. aureus HSPs anti-dectin-1 mAb

| Population   | #Events | %Parent | %Total |
|--------------|---------|---------|--------|
| ■ All Events | 11,209  | ####    | 100.0  |
| ■ P1         | 10,000  | 89.2    | 89.2   |
| ⊗ P2         | 2,439   | 24.4    | 21.8   |

S. aureus HSPs anti-dectin-1 mAb

| Population   | #Events | %Parent | FITC-A Mean |
|--------------|---------|---------|-------------|
| ■ All Events | 11,209  | ####    | 307         |
| ■ P1         | 10,000  | 89.2    | 296         |
| ⊗ P2         | 2,439   | 24.4    | 636         |



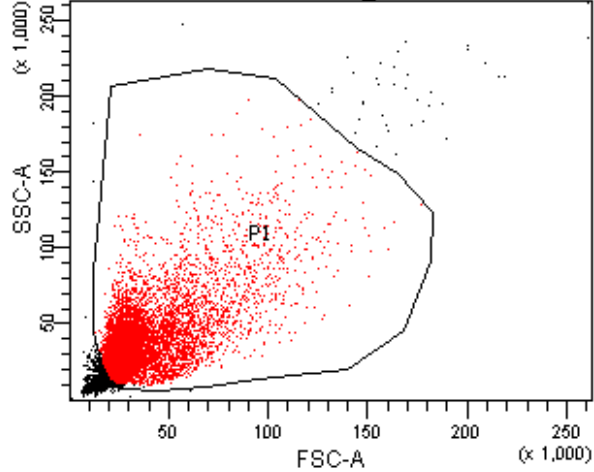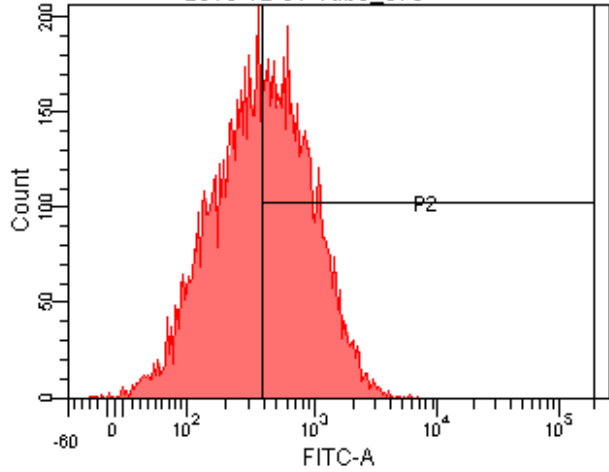

*S. aureus* HSPs@glucan anti-dectin-1 mAb

| Population   | #Events | %Parent | %Total |
|--------------|---------|---------|--------|
| ■ All Events | 12,580  | ####    | 100.0  |
| ■ P1         | 10,000  | 79.5    | 79.5   |
| ⊠ P2         | 4,974   | 49.7    | 39.5   |

*S. aureus* HSPs@glucan anti-dectin-1 mAb

| Population   | #Events | %Parent | FITC-A Mean |
|--------------|---------|---------|-------------|
| ■ All Events | 12,580  | ####    | 465         |
| ■ P1         | 10,000  | 79.5    | 526         |
| ⊠ P2         | 4,974   | 49.7    | 844         |
