# Supplementary material for: Antigen uptake and immunoadjuvant activity of pathogen-mimetic hollow silica particles conjugated with β-glucan
Source: Royal Society of Chemistry journal article supplement (doi:10.1039/c8tb02129e), 2018-01-01
Supplement: c8tb02129e7.pdf [file c8tb02129e7.pdf]

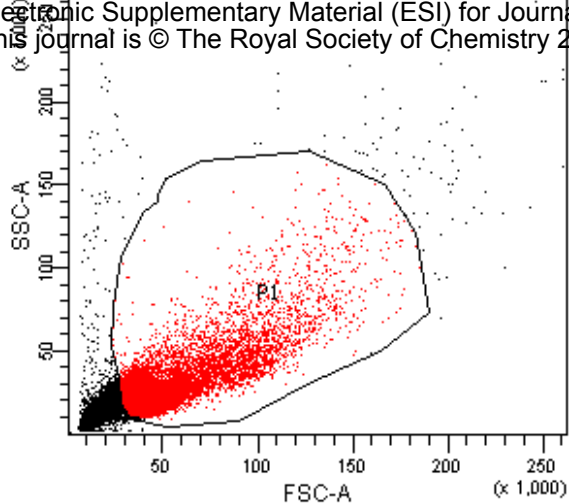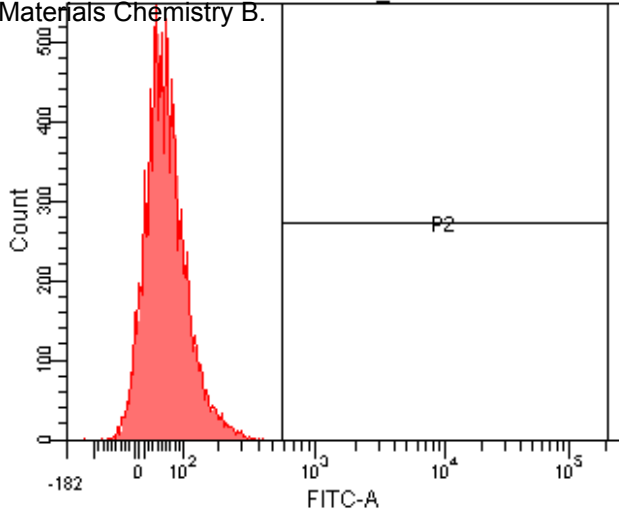

| Blank        |         |         |        |
|--------------|---------|---------|--------|
| Population   | #Events | %Parent | %Total |
| ■ All Events | 17,428  | ####    | 100.0  |
| ■ P1         | 10,000  | 57.4    | 57.4   |
| ⊠ P2         | 21      | 0.1     | 0.1    |

| Blank        |         |         |  | FITC-A |
|--------------|---------|---------|--|--------|
| Population   | #Events | %Parent |  | Mean   |
| ■ All Events | 17,428  | ####    |  | 50     |
| ■ P1         | 10,000  | 57.4    |  | 60     |
| ⊠ P2         | 21      | 0.1     |  | 4,529  |

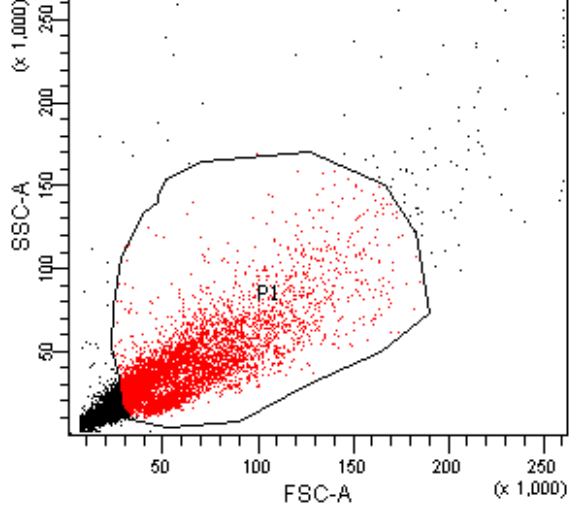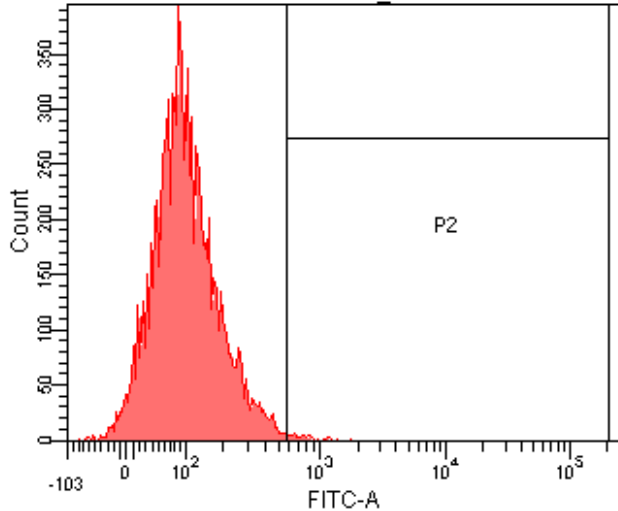

### DQ-OVA 0.5h

| Population   | #Events | %Parent | %Total |
|--------------|---------|---------|--------|
| ■ All Events | 19,439  | ####    | 100.0  |
| ■ P1         | 10,000  | 51.4    | 51.4   |
| ⊠ P2         | 94      | 0.5     | 0.5    |

### DQ-OVA 0.5h

| Population   | #Events | %Parent | FITC-A Mean |
|--------------|---------|---------|-------------|
| ■ All Events | 19,439  | ####    | 84          |
| ■ P1         | 10,000  | 51.4    | 114         |
| ⊠ P2         | 94      | 0.5     | 834         |

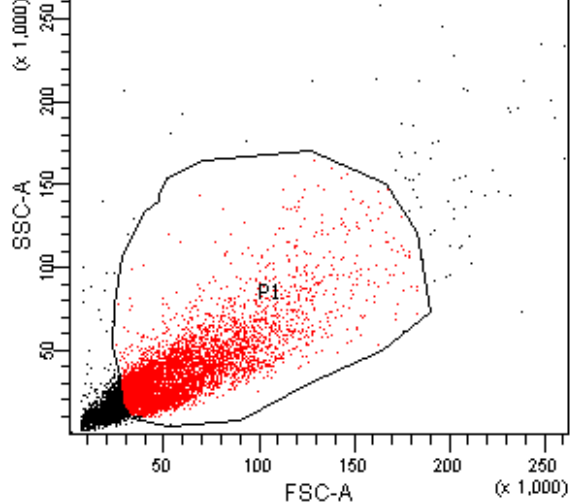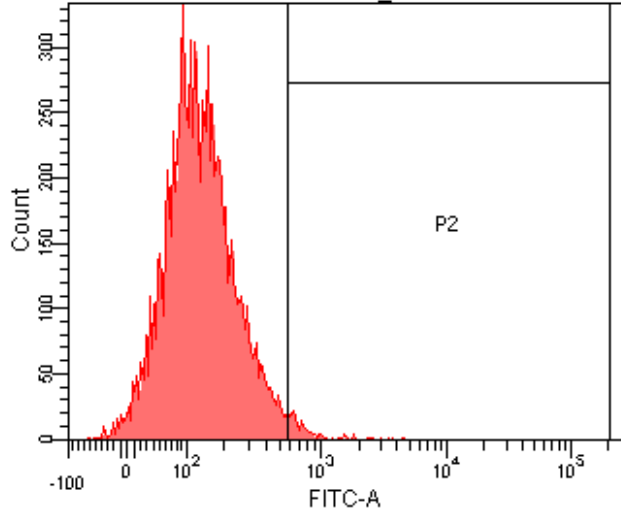

PS HSPs 0.5h

| Population | #Events | %Parent | %Total |
|------------|---------|---------|--------|
| All Events | 19,237  | ####    | 100.0  |
| P1         | 10,000  | 52.0    | 52.0   |
| P2         | 211     | 1.1     | 1.1    |

PS HSPs 0.5h

| Population | #Events | %Parent | FITC-A Mean |
|------------|---------|---------|-------------|
| All Events | 19,237  | ####    | 114         |
| P1         | 10,000  | 52.0    | 155         |
| P2         | 211     | 1.1     | 917         |

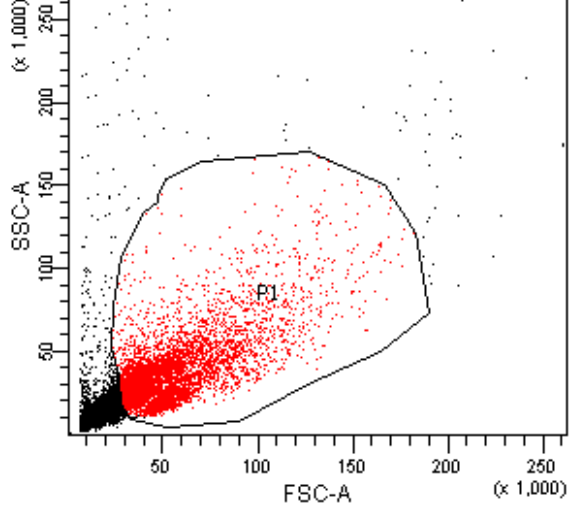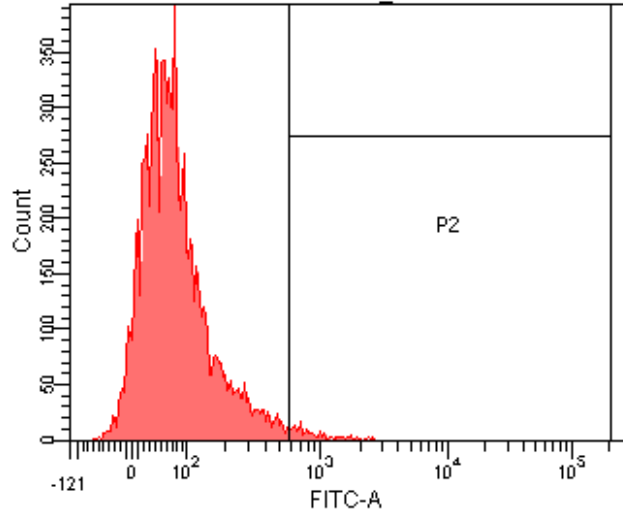

PS HSPs@glucan 0.5h

| Population   | #Events | %Parent | %Total |
|--------------|---------|---------|--------|
| ■ All Events | 19,297  | ####    | 100.0  |
| ■ P1         | 10,000  | 51.8    | 51.8   |
| ⊠ P2         | 199     | 1.0     | 1.0    |

PS HSPs@glucan 0.5h

| Population   | #Events | %Parent | FITC-A Mean |
|--------------|---------|---------|-------------|
| ■ All Events | 19,297  | ####    | 72          |
| ■ P1         | 10,000  | 51.8    | 98          |
| ⊠ P2         | 199     | 1.0     | 932         |

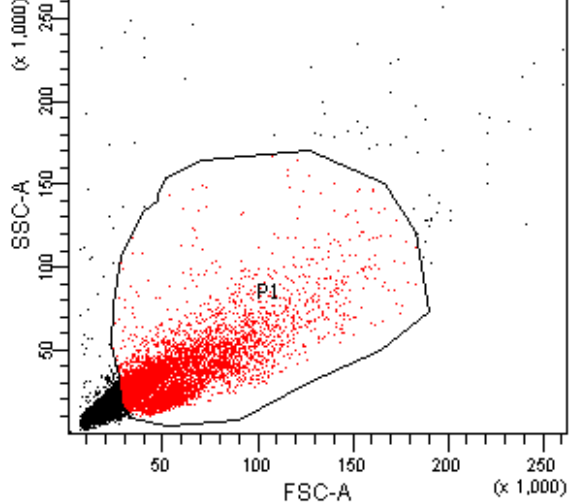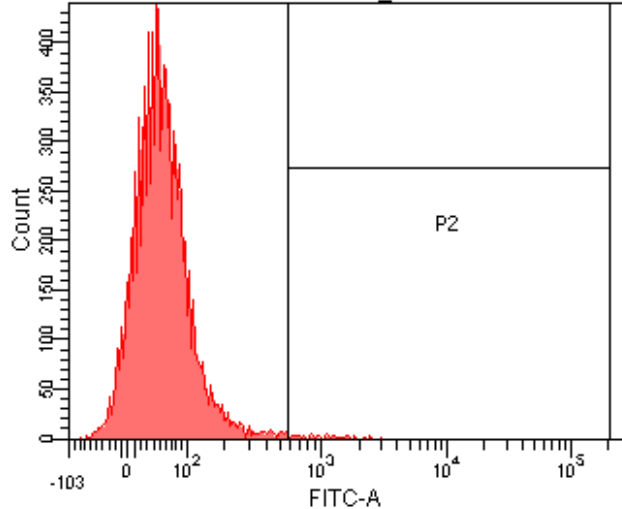

E. coli HSPs 0.5h

| Population   | #Events | %Parent | %Total |
|--------------|---------|---------|--------|
| ■ All Events | 19,550  | ####    | 100.0  |
| ■ P1         | 10,000  | 51.2    | 51.2   |
| ⊠ P2         | 81      | 0.4     | 0.4    |

E. coli HSPs 0.5h

| Population   | #Events | %Parent | FITC-A Mean |
|--------------|---------|---------|-------------|
| ■ All Events | 19,550  | ####    | 49          |
| ■ P1         | 10,000  | 51.2    | 64          |
| ⊠ P2         | 81      | 0.4     | 1,094       |

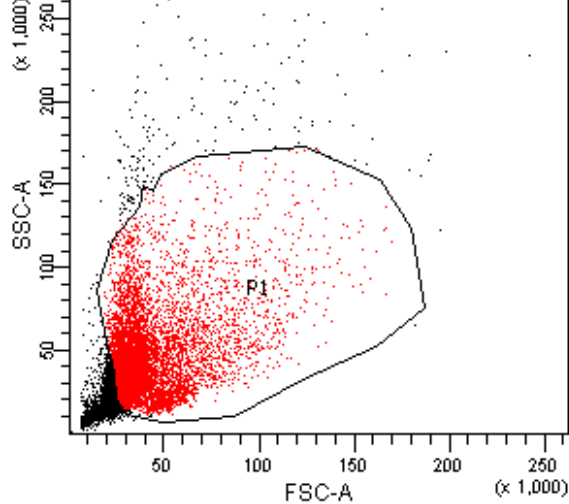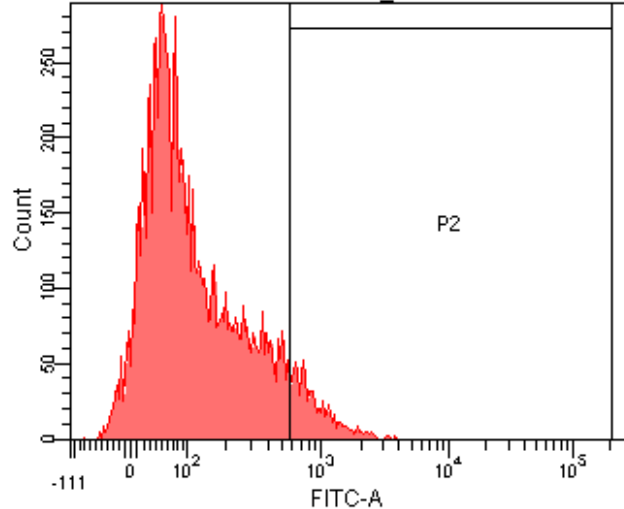

E. coli HSPs@glucan 0.5h

| Population | #Events | %Parent | %Total |
|------------|---------|---------|--------|
| All Events | 14,353  | ####    | 100.0  |
| P1         | 10,000  | 69.7    | 69.7   |
| P2         | 847     | 5.9     | 5.9    |

E. coli HSPs@glucan 0.5h

| Population | #Events | %Parent | FITC-A Mean |
|------------|---------|---------|-------------|
| All Events | 14,353  | ####    | 161         |
| P1         | 10,000  | 69.7    | 183         |
| P2         | 847     | 5.9     | 1,080       |

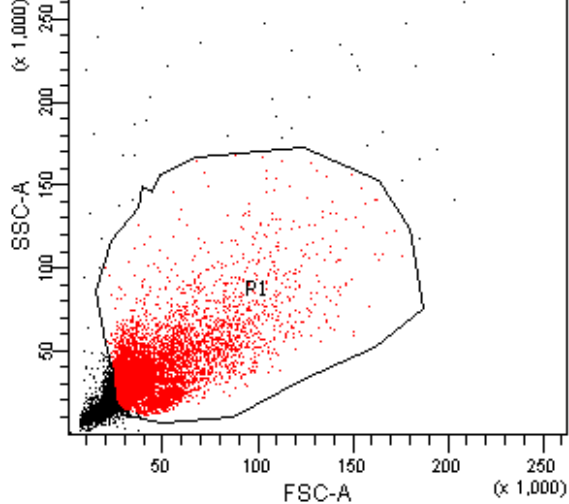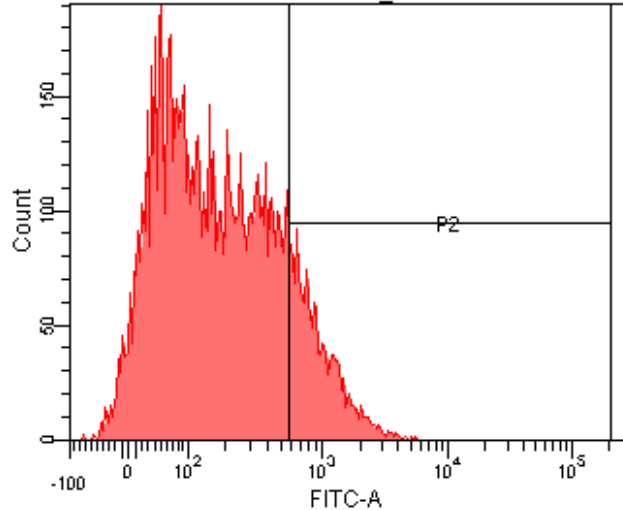

S. aureus HSPs 0.5h

| Population   | #Events | %Parent | %Total |
|--------------|---------|---------|--------|
| ■ All Events | 15,248  | ####    | 100.0  |
| ■ P1         | 10,000  | 65.6    | 65.6   |
| ⊠ P2         | 1,608   | 10.5    | 10.5   |

S. aureus HSPs 0.5h

| Population   | #Events | %Parent | FITC-A Mean |
|--------------|---------|---------|-------------|
| ■ All Events | 15,248  | ####    | 234         |
| ■ P1         | 10,000  | 65.6    | 301         |
| ⊠ P2         | 1,608   | 10.5    | 1,049       |

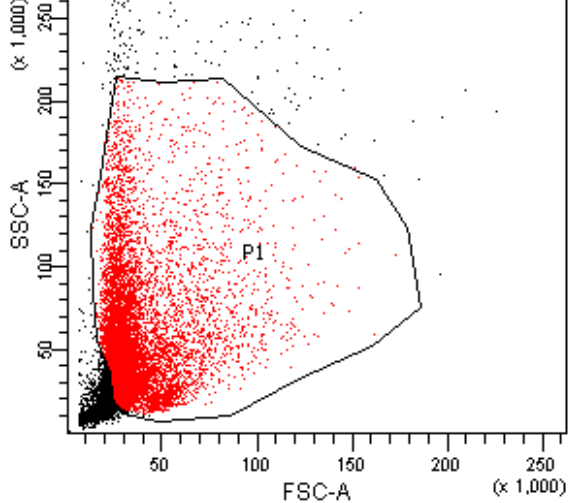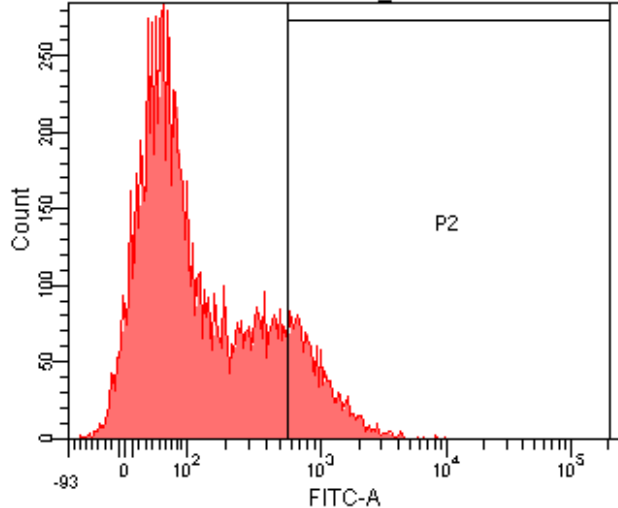

S. aureus HSPs@glucan 0.5h

| Population   | #Events | %Parent | %Total |
|--------------|---------|---------|--------|
| ■ All Events | 15,619  | ####    | 100.0  |
| ■ P1         | 11,034  | 70.6    | 70.6   |
| ⊠ P2         | 1,692   | 10.8    | 10.8   |

S. aureus HSPs@glucan 0.5h

| Population   | #Events | %Parent | FITC-A Mean |
|--------------|---------|---------|-------------|
| ■ All Events | 15,619  | ####    | 217         |
| ■ P1         | 11,034  | 70.6    | 254         |
| ⊠ P2         | 1,692   | 10.8    | 1,174       |



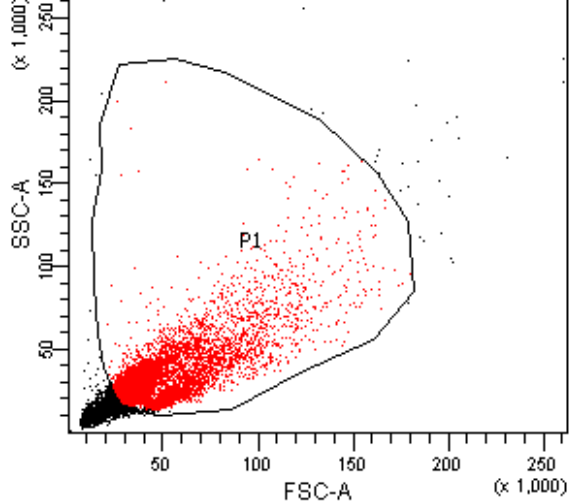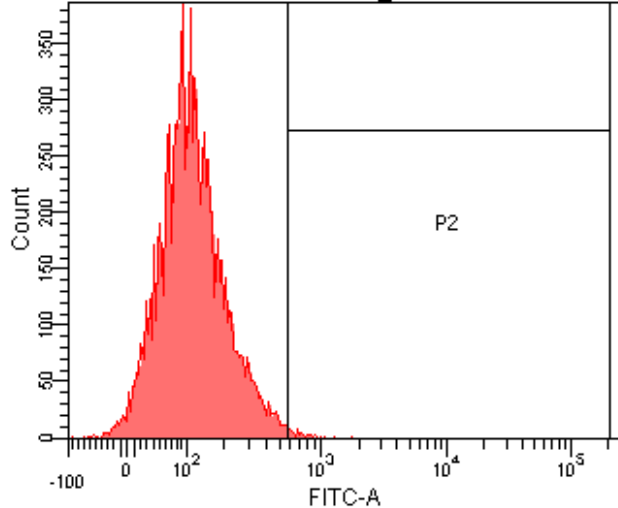

#### DQ-OVA 1h

| Population | #Events | %Parent | %Total |
|------------|---------|---------|--------|
| All Events | 17,622  | ####    | 100.0  |
| P1         | 10,000  | 56.7    | 56.7   |
| P2         | 67      | 0.4     | 0.4    |

#### DQ-OVA 1h

| Population | #Events | %Parent | FITC-A Mean |
|------------|---------|---------|-------------|
| All Events | 17,622  | ####    | 95          |
| P1         | 10,000  | 56.7    | 127         |
| P2         | 67      | 0.4     | 920         |

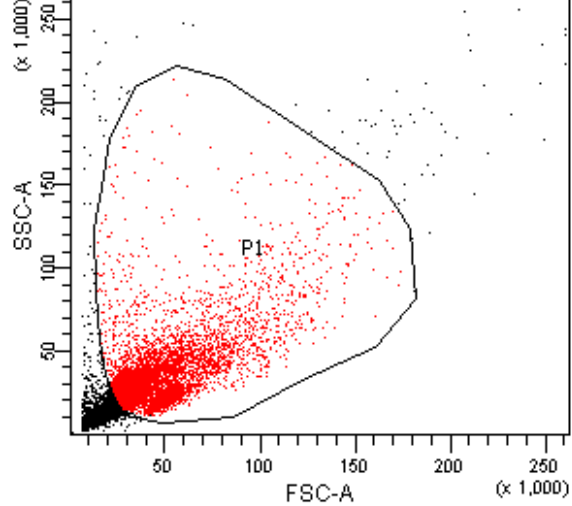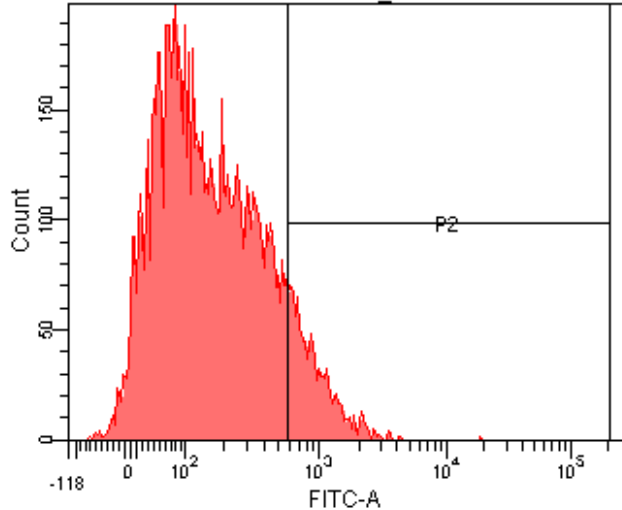

PS HSPs 1h

| Population   | #Events | %Parent | %Total |
|--------------|---------|---------|--------|
| ■ All Events | 16,144  | ####    | 100.0  |
| ■ P1         | 10,002  | 62.0    | 62.0   |
| ⊠ P2         | 1,233   | 7.6     | 7.6    |

PS HSPs 1h

| Population   | #Events | %Parent | FITC-A Mean |
|--------------|---------|---------|-------------|
| ■ All Events | 16,144  | ####    | 196         |
| ■ P1         | 10,002  | 62.0    | 253         |
| ⊠ P2         | 1,233   | 7.6     | 1,011       |

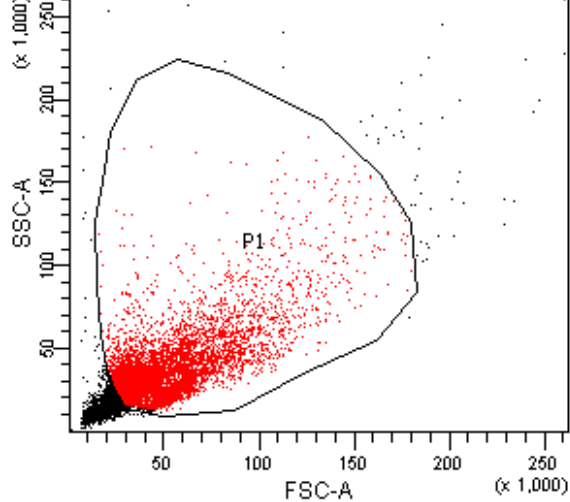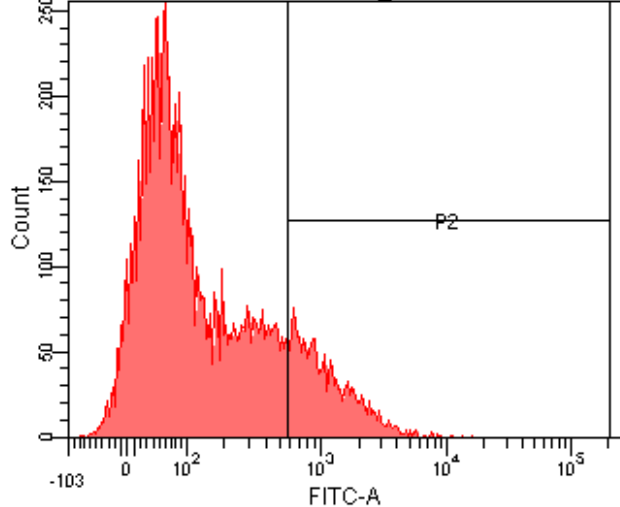

PS HSPs@glucan 1h

| Population   | #Events | %Parent | %Total |
|--------------|---------|---------|--------|
| ■ All Events | 18,278  | ####    | 100.0  |
| ■ P1         | 10,000  | 54.7    | 54.7   |
| ⊠ P2         | 1,915   | 10.5    | 10.5   |

PS HSPs@glucan 1h

| Population   | #Events | %Parent | FITC-A Mean |
|--------------|---------|---------|-------------|
| ■ All Events | 18,278  | ####    | 224         |
| ■ P1         | 10,000  | 54.7    | 320         |
| ⊠ P2         | 1,915   | 10.5    | 1,315       |

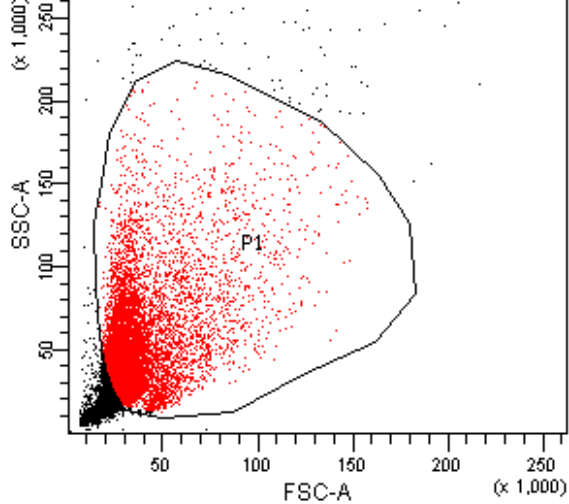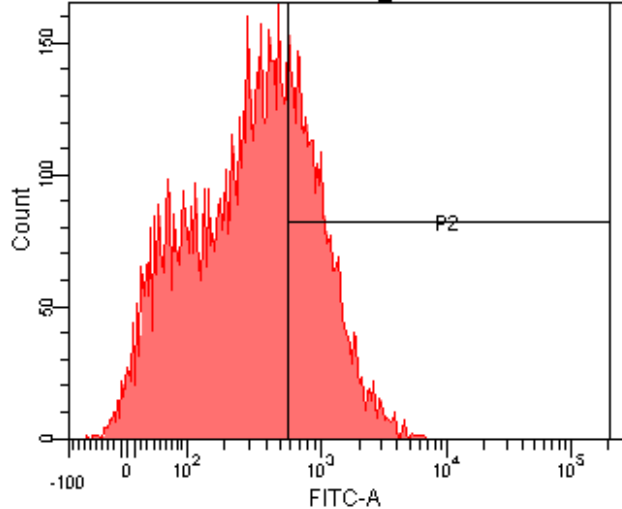

### E.coli HSPs 1h

| Population   | #Events | %Parent | %Total |
|--------------|---------|---------|--------|
| ■ All Events | 14,292  | ####    | 100.0  |
| ■ P1         | 10,000  | 70.0    | 70.0   |
| ⊠ P2         | 3,156   | 22.1    | 22.1   |

### E.coli HSPs 1h

| Population   | #Events | %Parent | FITC-A Mean |
|--------------|---------|---------|-------------|
| ■ All Events | 14,292  | ####    | 399         |
| ■ P1         | 10,000  | 70.0    | 495         |
| ⊠ P2         | 3,156   | 22.1    | 1,156       |

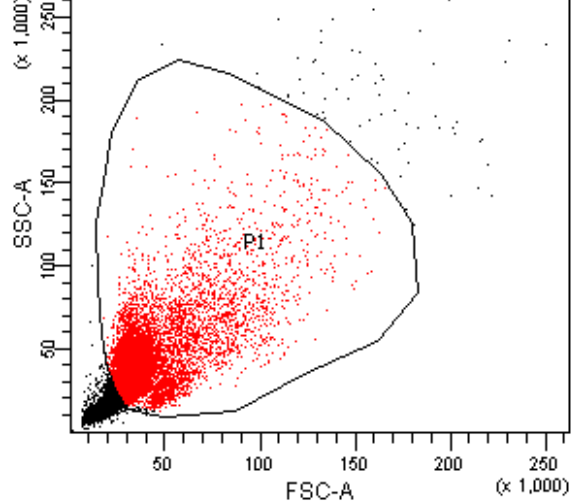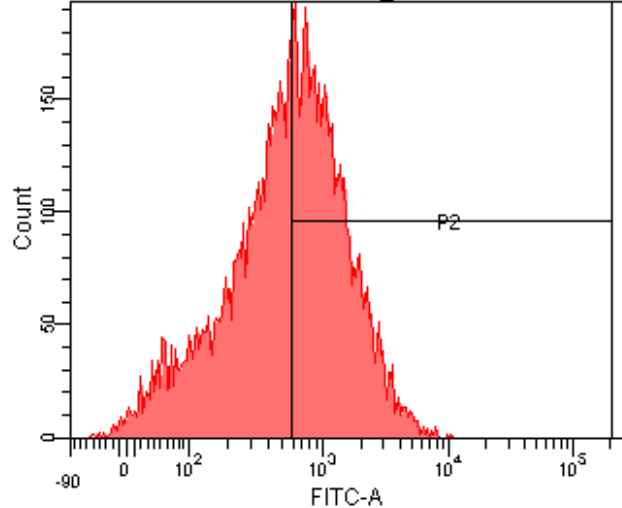

E.coli HSPs@glucan 1h

| Population | #Events | %Parent | %Total |
|------------|---------|---------|--------|
| All Events | 13,963  | ####    | 100.0  |
| P1         | 10,000  | 71.6    | 71.6   |
| P2         | 5,415   | 38.8    | 38.8   |

E.coli HSPs@glucan 1h

| Population | #Events | %Parent | FITC-A Mean |
|------------|---------|---------|-------------|
| All Events | 13,963  | ####    | 671         |
| P1         | 10,000  | 71.6    | 814         |
| P2         | 5,415   | 38.8    | 1,375       |

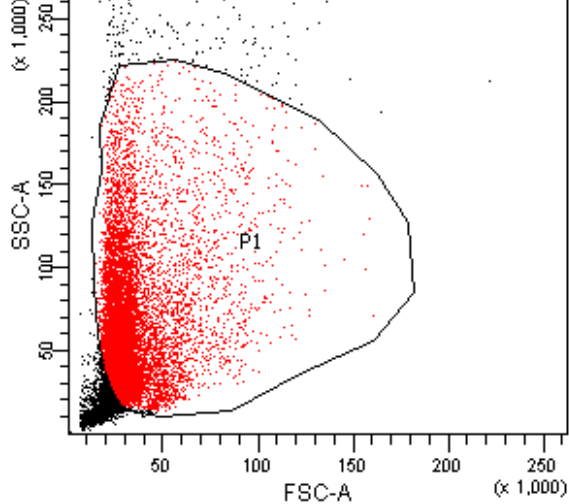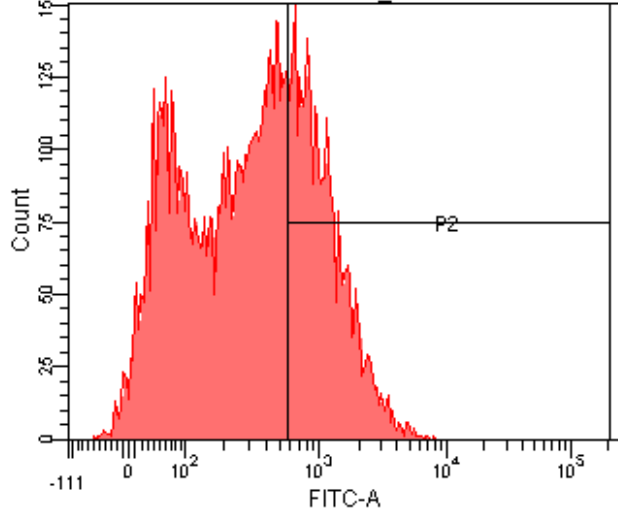

S. aureus HSPs 1h

| Population   | #Events | %Parent | %Total |
|--------------|---------|---------|--------|
| ■ All Events | 13,770  | ####    | 100.0  |
| ■ P1         | 10,000  | 72.6    | 72.6   |
| ⊠ P2         | 3,542   | 25.7    | 25.7   |

S. aureus HSPs 1h

| Population   | #Events | %Parent | FITC-A Mean |
|--------------|---------|---------|-------------|
| ■ All Events | 13,770  | ####    | 465         |
| ■ P1         | 10,000  | 72.6    | 538         |
| ⊠ P2         | 3,542   | 25.7    | 1,324       |

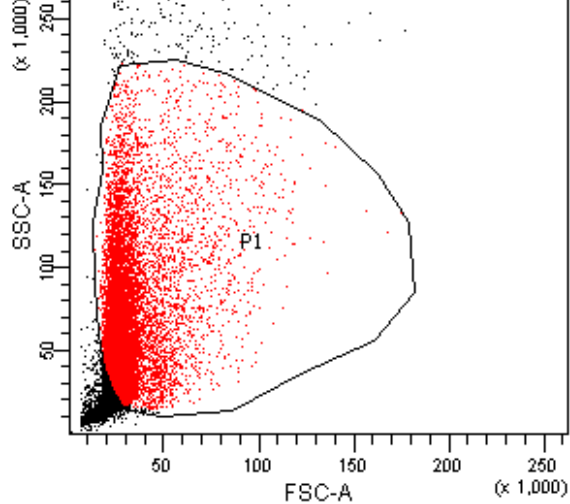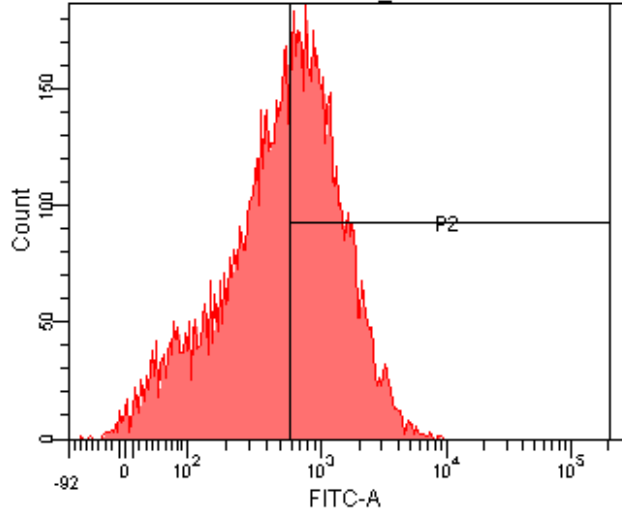

S. aureus HSPs@glucan 1h

| Population   | #Events | %Parent | %Total |
|--------------|---------|---------|--------|
| ■ All Events | 13,196  | ####    | 100.0  |
| ■ P1         | 10,000  | 75.8    | 75.8   |
| ⊠ P2         | 5,233   | 39.7    | 39.7   |

S. aureus HSPs@glucan 1h

| Population   | #Events | %Parent | FITC-A Mean |
|--------------|---------|---------|-------------|
| ■ All Events | 13,196  | ####    | 680         |
| ■ P1         | 10,000  | 75.8    | 769         |
| ⊠ P2         | 5,233   | 39.7    | 1,392       |

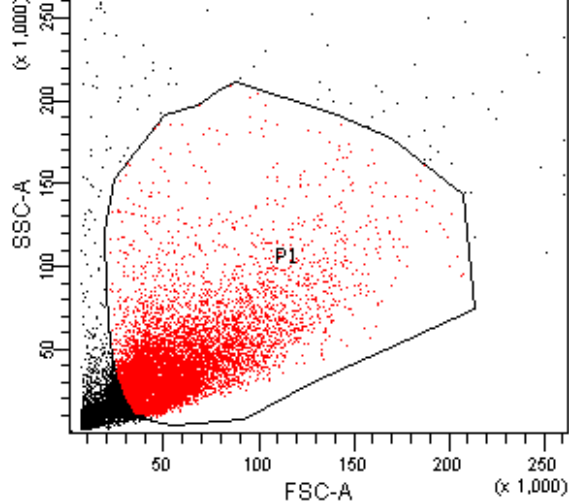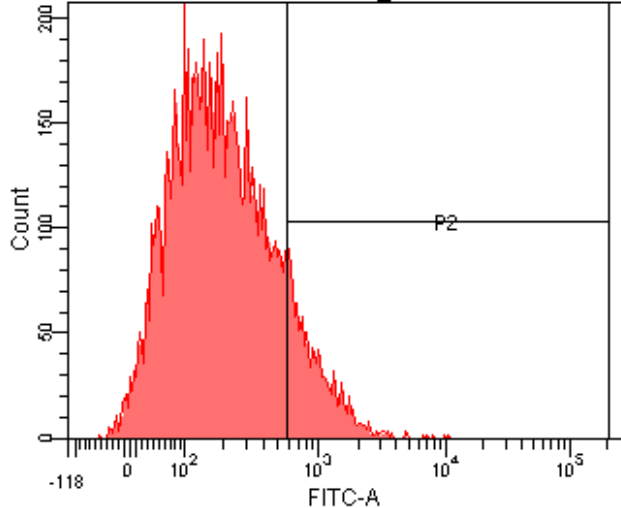

### DQ-OVA 4h

| Population   | #Events | %Parent | %Total |
|--------------|---------|---------|--------|
| ■ All Events | 17,146  | ####    | 100.0  |
| ■ P1         | 10,000  | 58.3    | 58.3   |
| ⊠ P2         | 1,318   | 7.7     | 7.7    |

### DQ-OVA 4h

| Population   | #Events | %Parent | FITC-A Mean |
|--------------|---------|---------|-------------|
| ■ All Events | 17,146  | ####    | 202         |
| ■ P1         | 10,000  | 58.3    | 295         |
| ⊠ P2         | 1,318   | 7.7     | 1,068       |



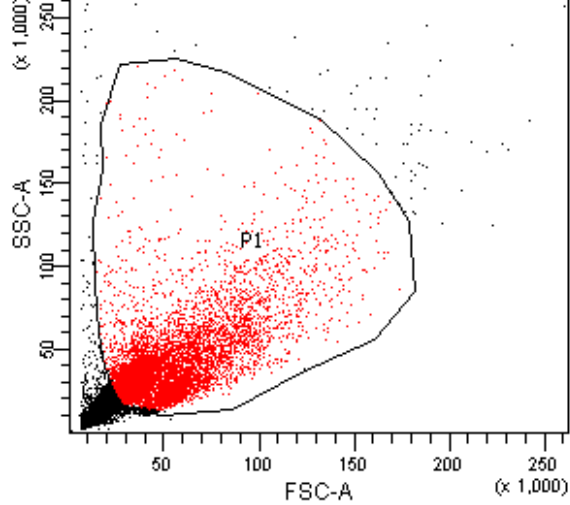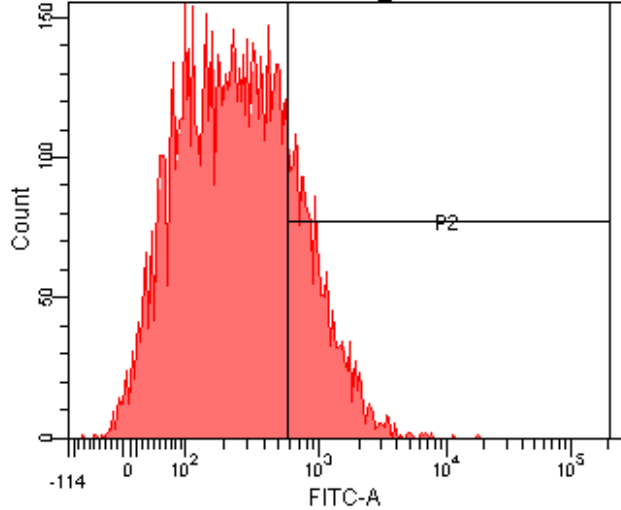

PS HSPs 4h

| Population   | #Events | %Parent | %Total |
|--------------|---------|---------|--------|
| ■ All Events | 15,310  | ####    | 100.0  |
| ■ P1         | 10,000  | 65.3    | 65.3   |
| ⊠ P2         | 2,141   | 14.0    | 14.0   |

PS HSPs 4h

| Population   | #Events | %Parent | FITC-A Mean |
|--------------|---------|---------|-------------|
| ■ All Events | 15,310  | ####    | 300         |
| ■ P1         | 10,000  | 65.3    | 394         |
| ⊠ P2         | 2,141   | 14.0    | 1,129       |

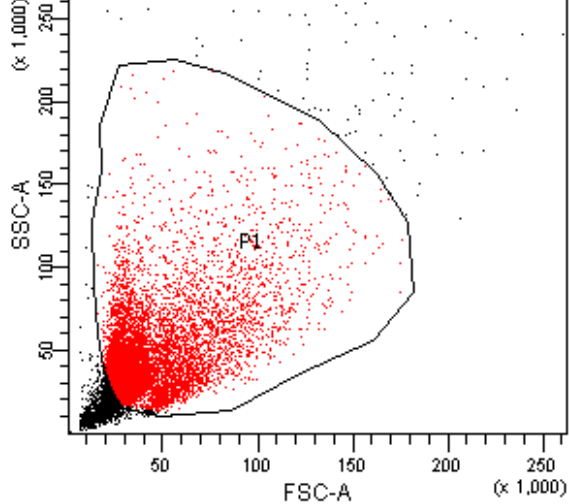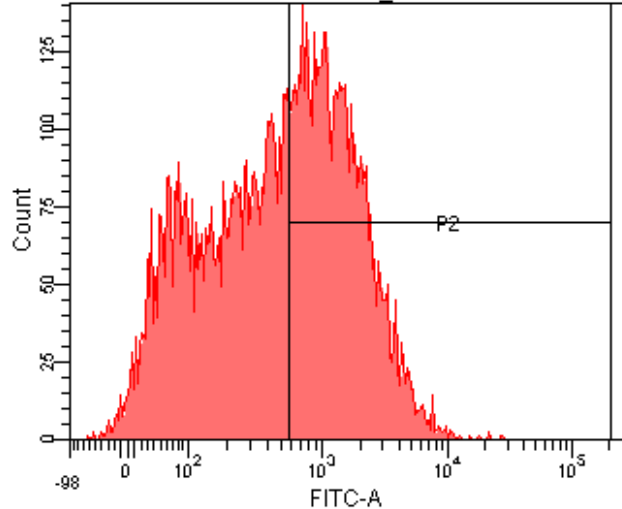

PS HSPs@glucan 4h

| Population   | #Events | %Parent | %Total |
|--------------|---------|---------|--------|
| ■ All Events | 14,768  | ####    | 100.0  |
| ■ P1         | 10,000  | 67.7    | 67.7   |
| ⊠ P2         | 5,127   | 34.7    | 34.7   |

PS HSPs@glucan 4h

| Population   | #Events | %Parent | FITC-A<br>Mean |
|--------------|---------|---------|----------------|
| ■ All Events | 14,768  | ####    | 689            |
| ■ P1         | 10,000  | 67.7    | 904            |
| ⊠ P2         | 5,127   | 34.7    | 1,664          |

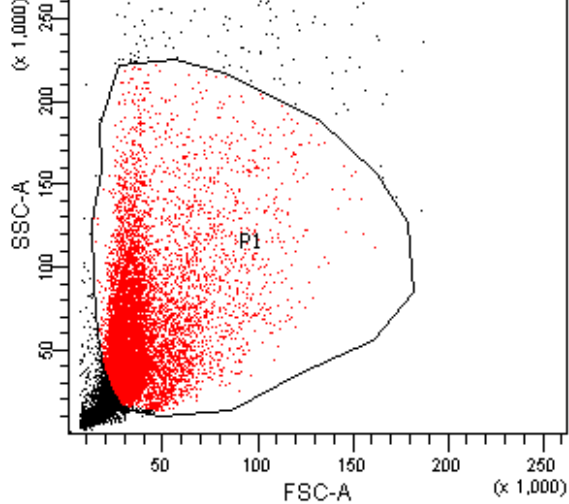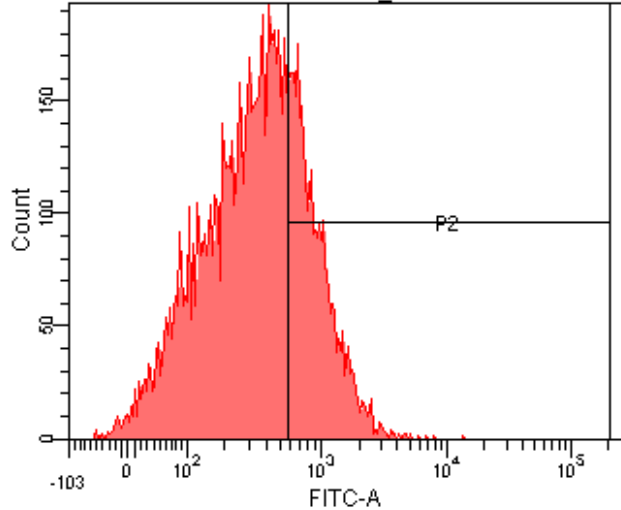

#### E.coli HSPs 4h

| Population   | #Events | %Parent | %Total |
|--------------|---------|---------|--------|
| ■ All Events | 13,587  | ####    | 100.0  |
| ■ P1         | 10,000  | 73.6    | 73.6   |
| ⊠ P2         | 2,979   | 21.9    | 21.9   |

#### E.coli HSPs 4h

| Population   | #Events | %Parent | FITC-A Mean |
|--------------|---------|---------|-------------|
| ■ All Events | 13,587  | ####    | 396         |
| ■ P1         | 10,000  | 73.6    | 475         |
| ⊠ P2         | 2,979   | 21.9    | 1,058       |

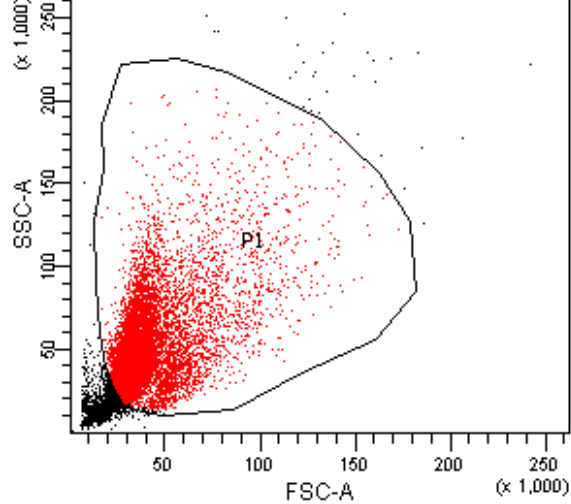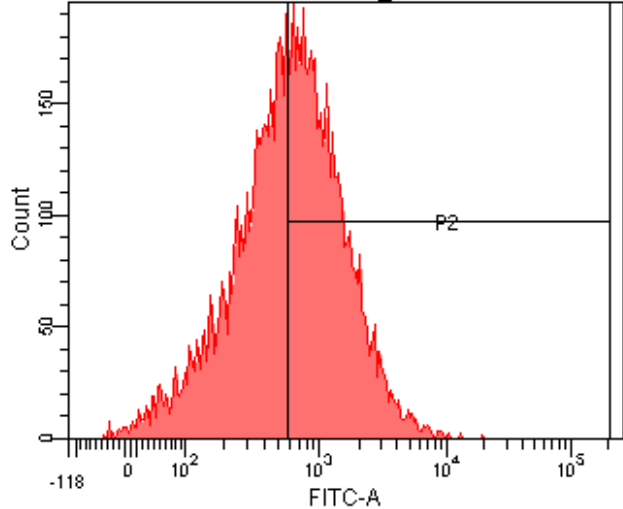

E.coli HSPs@glucan 4h

| Population   | #Events | %Parent | %Total |
|--------------|---------|---------|--------|
| ■ All Events | 13,044  | ####    | 100.0  |
| ■ P1         | 10,000  | 76.7    | 76.7   |
| ⊠ P2         | 5,378   | 41.2    | 41.2   |

E.coli HSPs@glucan 4h

| Population   | #Events | %Parent | FITC-A Mean |
|--------------|---------|---------|-------------|
| ■ All Events | 13,044  | ####    | 706         |
| ■ P1         | 10,000  | 76.7    | 854         |
| ⊠ P2         | 5,378   | 41.2    | 1,360       |

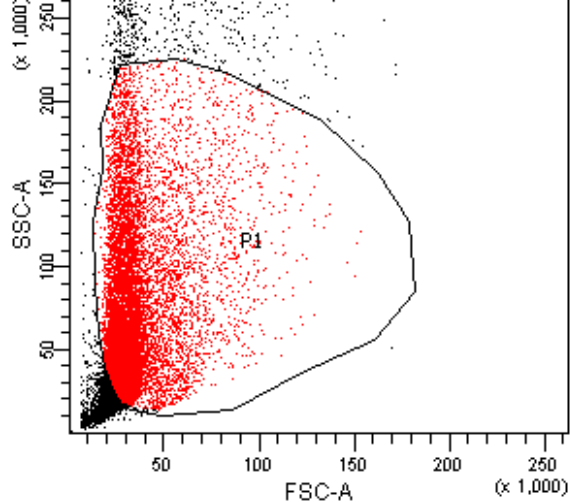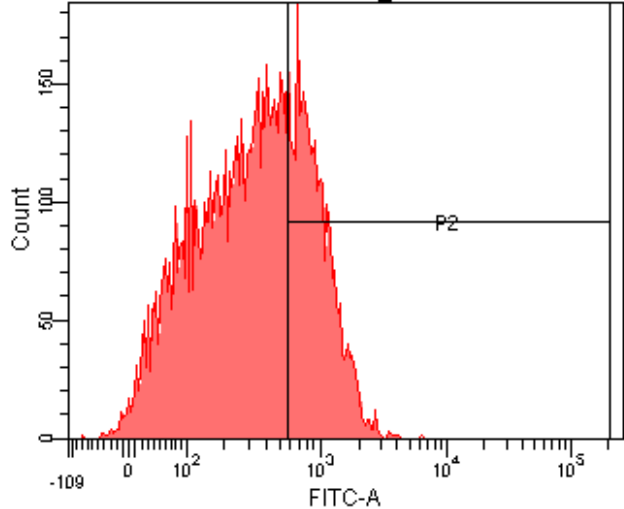

S. aureus HSPs 4h

| Population | #Events | %Parent | %Total |
|------------|---------|---------|--------|
| All Events | 13,618  | ####    | 100.0  |
| P1         | 10,000  | 73.4    | 73.4   |
| P2         | 3,930   | 28.9    | 28.9   |

S. aureus HSPs 4h

| Population | #Events | %Parent | FITC-A Mean |
|------------|---------|---------|-------------|
| All Events | 13,618  | ####    | 498         |
| P1         | 10,000  | 73.4    | 471         |
| P2         | 3,930   | 28.9    | 1,238       |

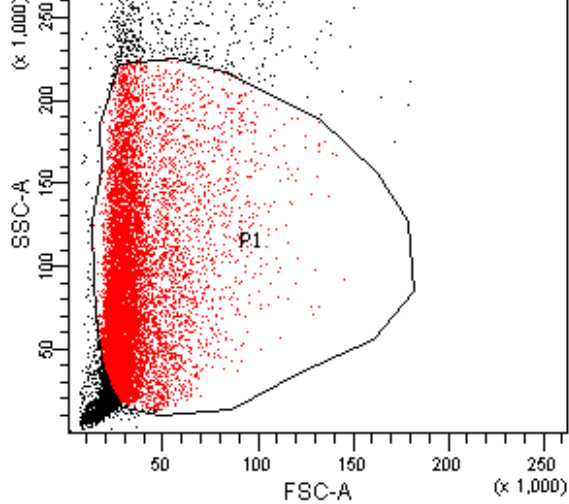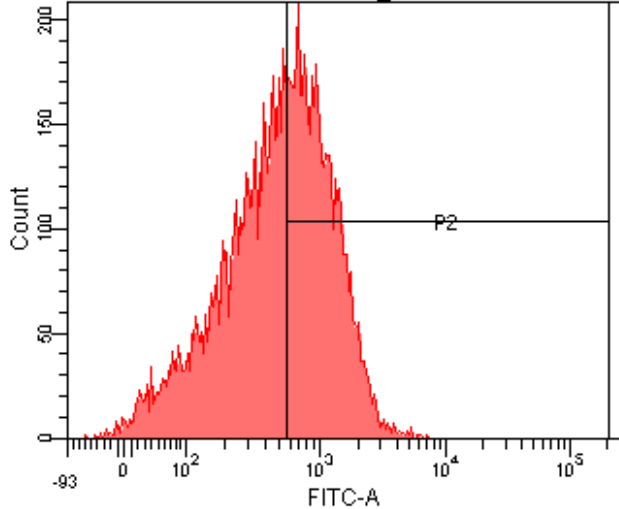

S. aureus HSPs@glucan 4h

| Population | #Events | %Parent | %Total |
|------------|---------|---------|--------|
| All Events | 13,125  | ####    | 100.0  |
| P1         | 10,000  | 76.2    | 76.2   |
| P2         | 5,499   | 41.9    | 41.9   |

S. aureus HSPs@glucan 4h

| Population | #Events | %Parent | FITC-A Mean |
|------------|---------|---------|-------------|
| All Events | 13,125  | ####    | 708         |
| P1         | 10,000  | 76.2    | 672         |
| P2         | 5,499   | 41.9    | 1,365       |

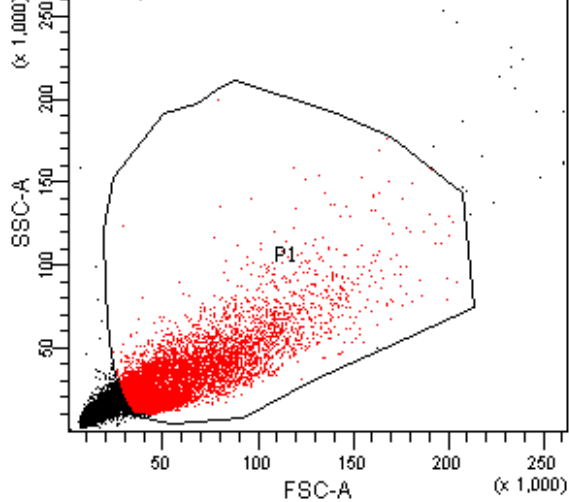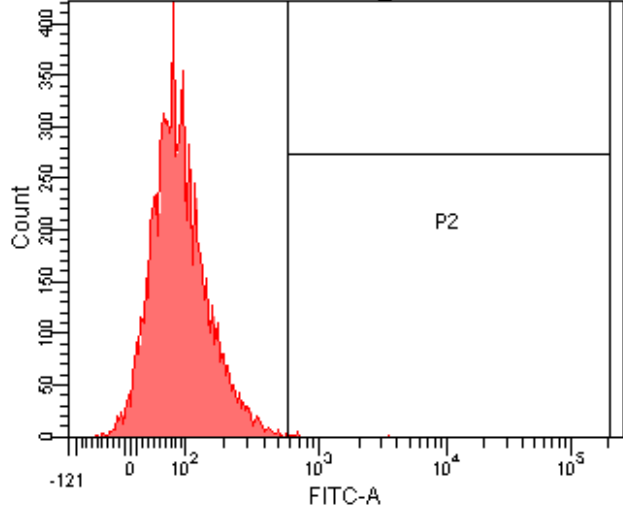

### DQ-OVA 24h

| Population | #Events | %Parent | %Total |
|------------|---------|---------|--------|
| All Events | 22,815  | ####    | 100.0  |
| P1         | 9,113   | 39.9    | 39.9   |
| P2         | 20      | 0.1     | 0.1    |

### DQ-OVA 24h

| Population | #Events | %Parent | FITC-A Mean |
|------------|---------|---------|-------------|
| All Events | 22,815  | ####    | 60          |
| P1         | 9,113   | 39.9    | 94          |
| P2         | 20      | 0.1     | 884         |

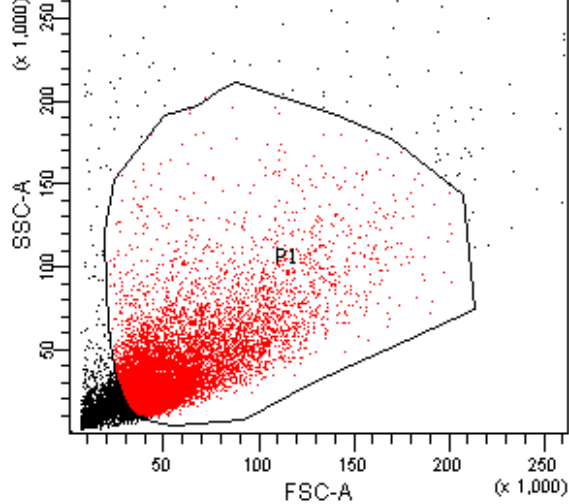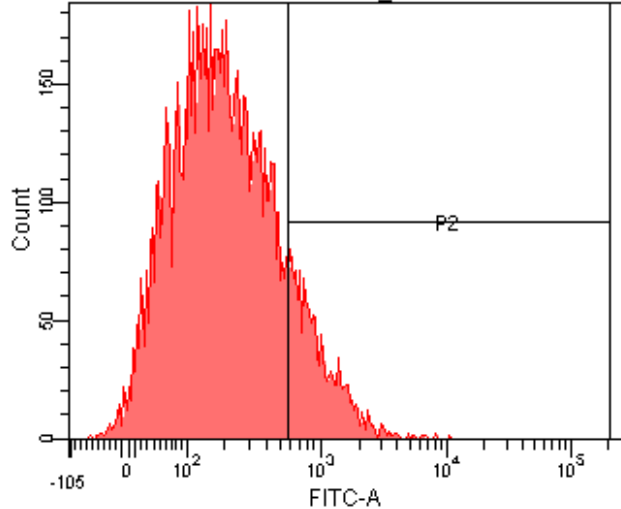

### PS HSPs 24h

| Population   | #Events | %Parent | %Total |
|--------------|---------|---------|--------|
| ■ All Events | 16,586  | ####    | 100.0  |
| ■ P1         | 10,000  | 60.3    | 60.3   |
| ⊠ P2         | 1,442   | 8.7     | 8.7    |

### PS HSPs 24h

| Population   | #Events | %Parent | FITC-A Mean |
|--------------|---------|---------|-------------|
| ■ All Events | 16,586  | ####    | 220         |
| ■ P1         | 10,000  | 60.3    | 310         |
| ⊠ P2         | 1,442   | 8.7     | 1,125       |



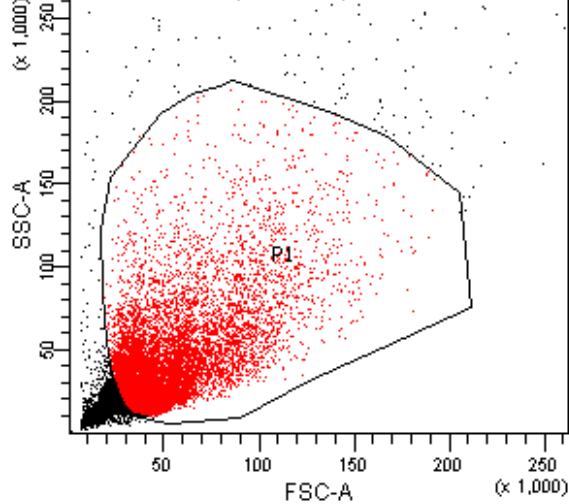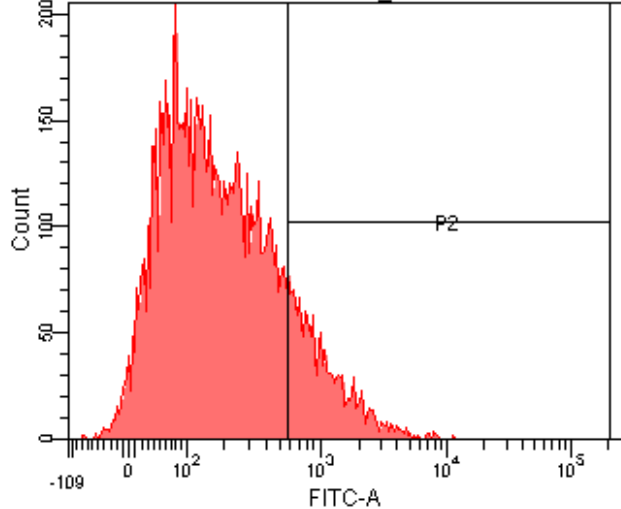

PS HSPs@glucan 24h

| Population   | #Events | %Parent | %Total |
|--------------|---------|---------|--------|
| ■ All Events | 14,434  | ####    | 100.0  |
| ■ P1         | 10,000  | 69.3    | 69.3   |
| ⊠ P2         | 1,648   | 11.4    | 11.4   |

PS HSPs@glucan 24h

| Population   | #Events | %Parent | FITC-A Mean |
|--------------|---------|---------|-------------|
| ■ All Events | 14,434  | ####    | 282         |
| ■ P1         | 10,000  | 69.3    | 337         |
| ⊠ P2         | 1,648   | 11.4    | 1,423       |

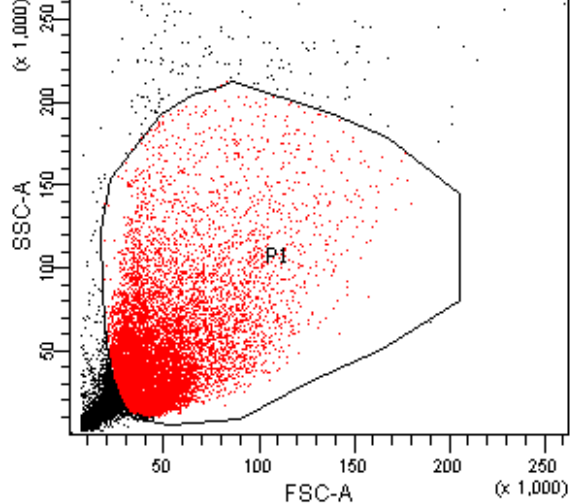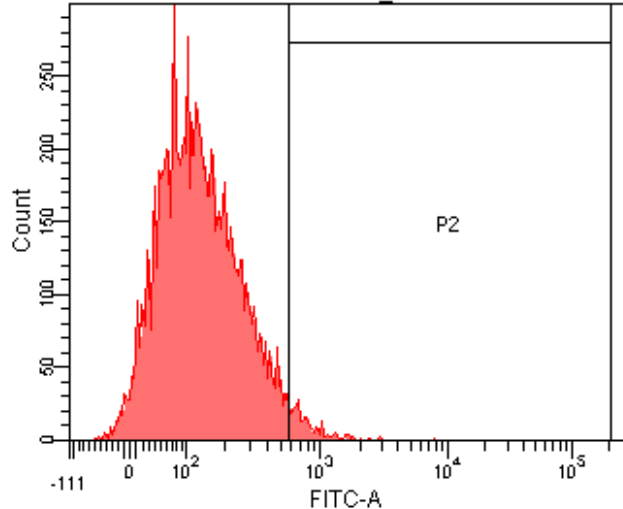

#### E.coli HSPs 24h

| Population | #Events | %Parent | %Total |
|------------|---------|---------|--------|
| All Events | 14,350  | ####    | 100.0  |
| P1         | 10,000  | 69.7    | 69.7   |
| P2         | 447     | 3.1     | 3.1    |

#### E.coli HSPs 24h

| Population | #Events | %Parent | FITC-A Mean |
|------------|---------|---------|-------------|
| All Events | 14,350  | ####    | 144         |
| P1         | 10,000  | 69.7    | 163         |
| P2         | 447     | 3.1     | 1,053       |

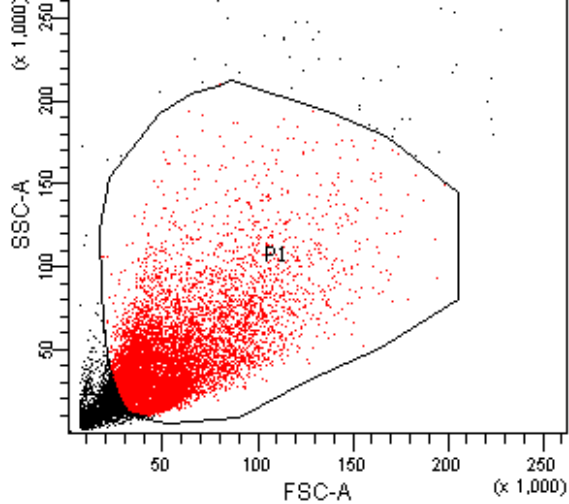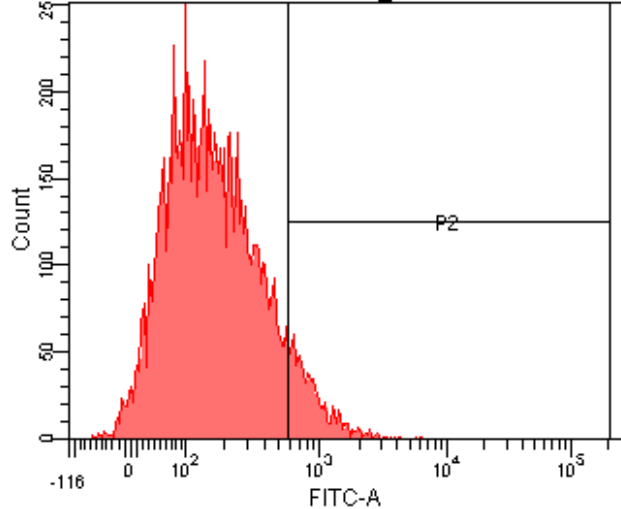

E.coli HSPs@glucan 24h

| Population   | #Events | %Parent | %Total |
|--------------|---------|---------|--------|
| ■ All Events | 14,230  | ####    | 100.0  |
| ■ P1         | 10,000  | 70.3    | 70.3   |
| ⊠ P2         | 845     | 5.9     | 5.9    |

E.coli HSPs@glucan 24h

| Population   | #Events | %Parent | FITC-A Mean |
|--------------|---------|---------|-------------|
| ■ All Events | 14,230  | ####    | 187         |
| ■ P1         | 10,000  | 70.3    | 235         |
| ⊠ P2         | 845     | 5.9     | 995         |

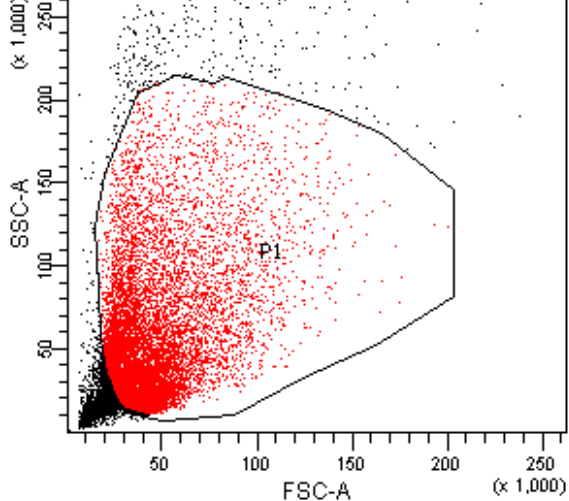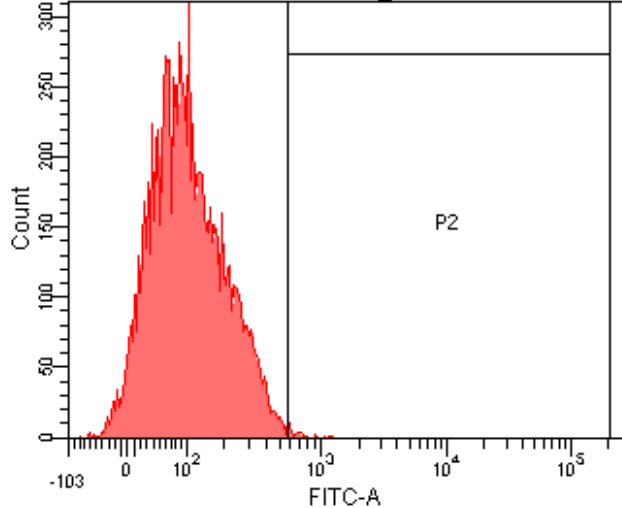

S. aureus HSPs 24h

| Population | #Events | %Parent | %Total |
|------------|---------|---------|--------|
| All Events | 14,168  | ####    | 100.0  |
| P1         | 10,000  | 70.6    | 70.6   |
| P2         | 260     | 1.8     | 1.8    |

S. aureus HSPs 24h

| Population | #Events | %Parent | FITC-A Mean |
|------------|---------|---------|-------------|
| All Events | 14,168  | ####    | 116         |
| P1         | 10,000  | 70.6    | 119         |
| P2         | 260     | 1.8     | 884         |

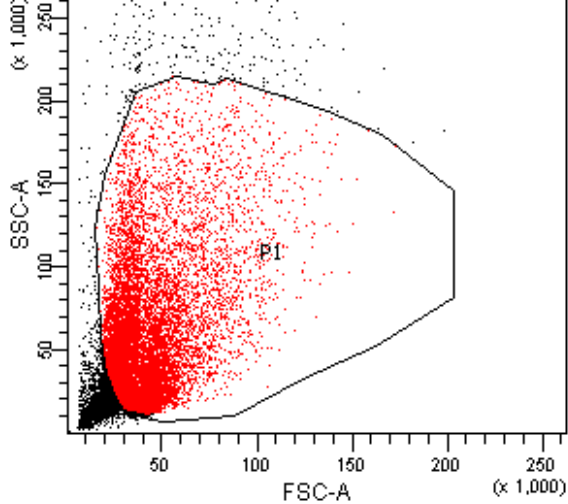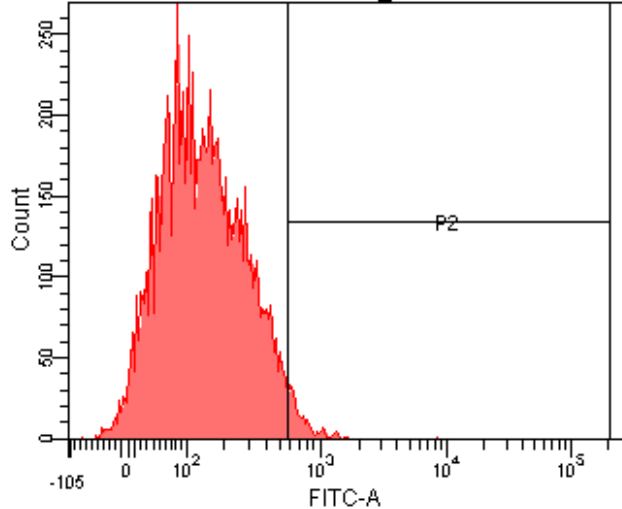

S. aureus HSPs@glucan 24h

| Population | #Events | %Parent | %Total |
|------------|---------|---------|--------|
| All Events | 14,393  | ####    | 100.0  |
| P1         | 10,000  | 69.5    | 69.5   |
| P2         | 460     | 3.2     | 3.2    |

S. aureus HSPs@glucan 24h

| Population | #Events | %Parent | FITC-A Mean |
|------------|---------|---------|-------------|
| All Events | 14,393  | ####    | 148         |
| P1         | 10,000  | 69.5    | 170         |
| P2         | 460     | 3.2     | 906         |

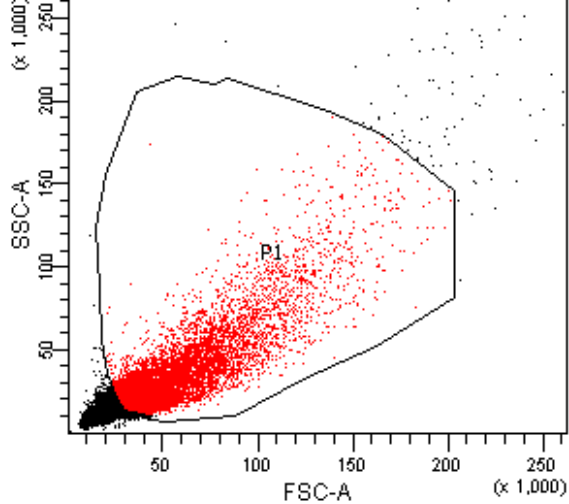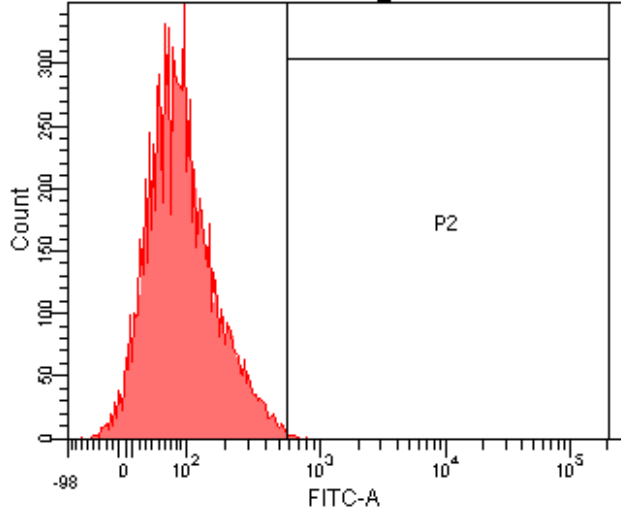

DQ-OVA 48h

| Population   | #Events | %Parent | %Total |
|--------------|---------|---------|--------|
| ■ All Events | 21,130  | ####    | 100.0  |
| ■ P1         | 10,000  | 47.3    | 47.3   |
| ⊠ P2         | 65      | 0.3     | 0.3    |

DQ-OVA 48h

| Population   | #Events | %Parent | FITC-A Mean |
|--------------|---------|---------|-------------|
| ■ All Events | 21,130  | ####    | 71          |
| ■ P1         | 10,000  | 47.3    | 103         |
| ⊠ P2         | 65      | 0.3     | 775         |

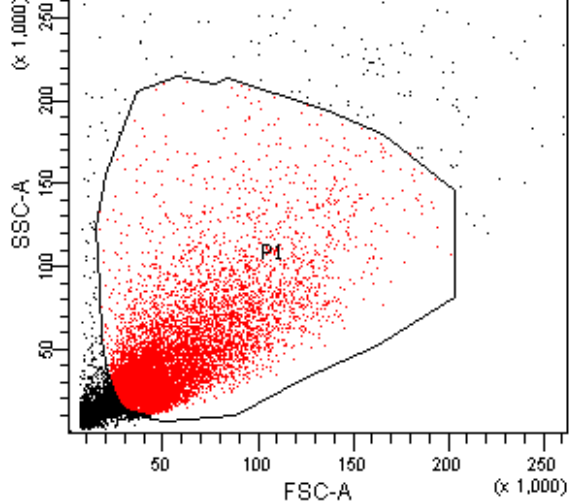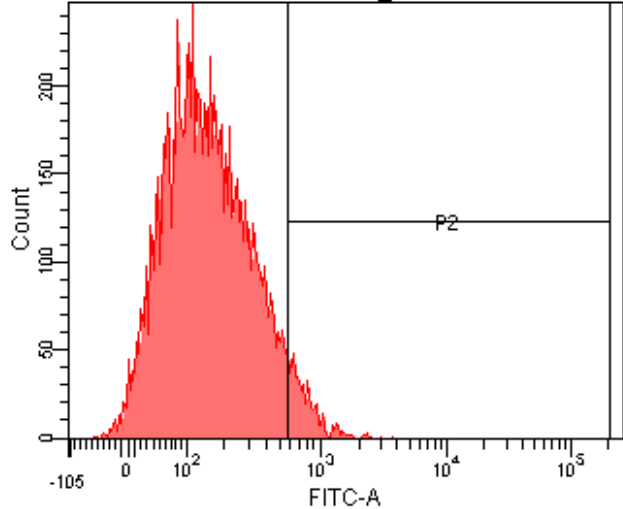

PS HSPs 48h

| Population | #Events | %Parent | %Total |
|------------|---------|---------|--------|
| All Events | 15,264  | ####    | 100.0  |
| P1         | 10,000  | 65.5    | 65.5   |
| P2         | 600     | 3.9     | 3.9    |

PS HSPs 48h

| Population | #Events | %Parent | FITC-A Mean |
|------------|---------|---------|-------------|
| All Events | 15,264  | ####    | 156         |
| P1         | 10,000  | 65.5    | 198         |
| P2         | 600     | 3.9     | 917         |

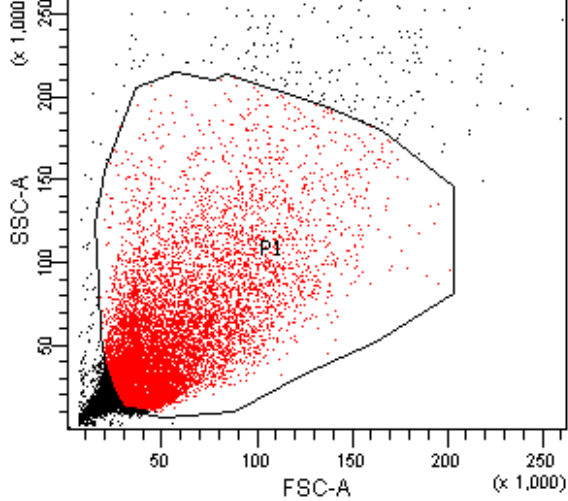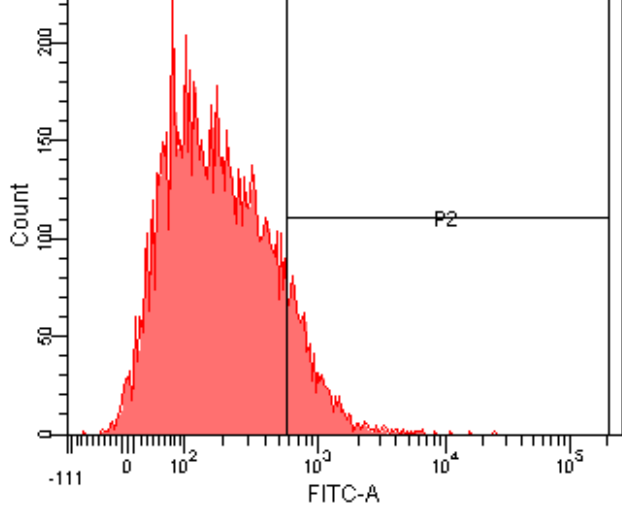

PS HSPs@glucan 48h

| Population | #Events | %Parent | %Total |
|------------|---------|---------|--------|
| All Events | 13,948  | ####    | 100.0  |
| P1         | 10,000  | 71.7    | 71.7   |
| P2         | 1,405   | 10.1    | 10.1   |

PS HSPs@glucan 48h

| Population | #Events | %Parent | FITC-A Mean |
|------------|---------|---------|-------------|
| All Events | 13,948  | ####    | 248         |
| P1         | 10,000  | 71.7    | 278         |
| P2         | 1,405   | 10.1    | ####        |



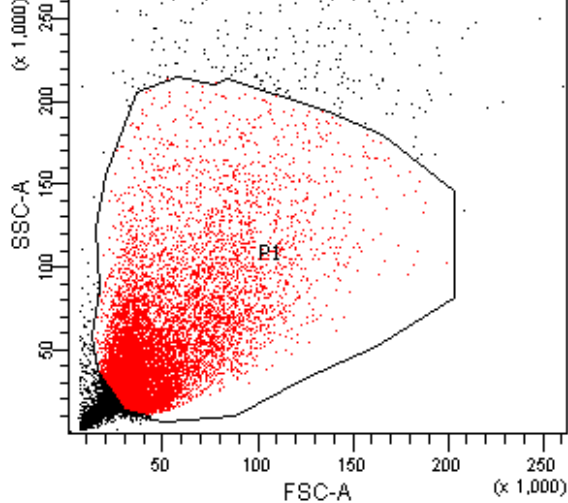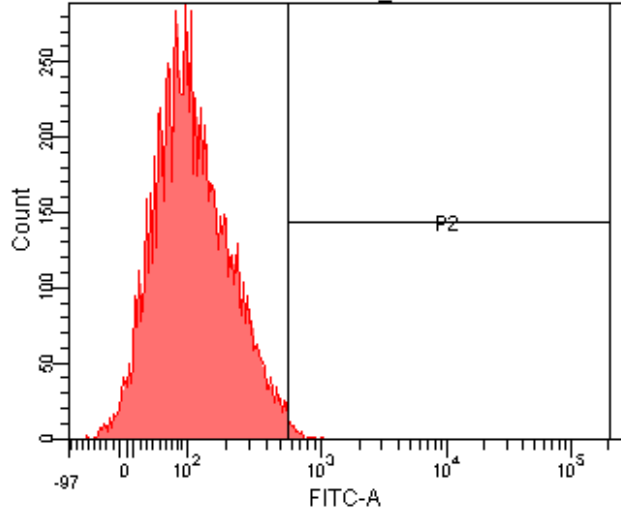

E. coli HSPs 48h

| Population   | #Events | %Parent | %Total |
|--------------|---------|---------|--------|
| ■ All Events | 13,455  | ####    | 100.0  |
| ■ P1         | 10,000  | 74.3    | 74.3   |
| ⊠ P2         | 274     | 2.0     | 2.0    |

E. coli HSPs 48h

| Population   | #Events | %Parent | FITC-A Mean |
|--------------|---------|---------|-------------|
| ■ All Events | 13,455  | ####    | 125         |
| ■ P1         | 10,000  | 74.3    | 130         |
| ⊠ P2         | 274     | 2.0     | 855         |

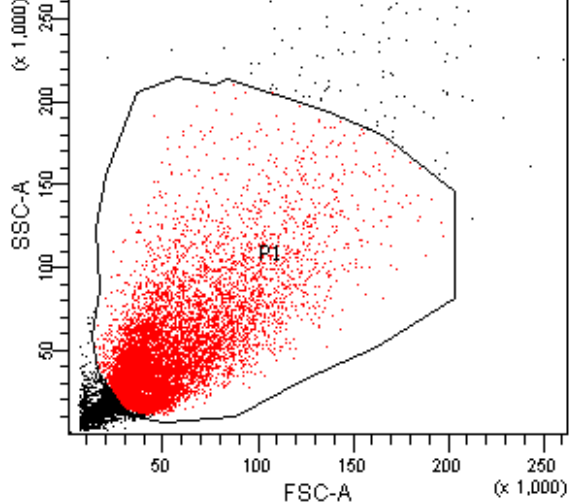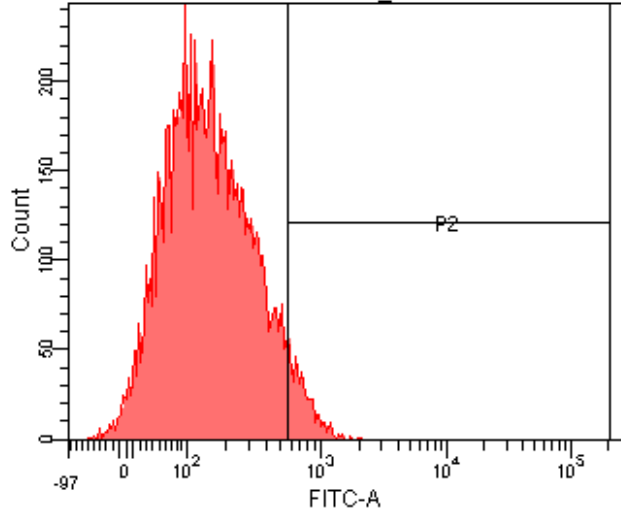

E. coli HSPs@glucan 48h

| Population | #Events | %Parent | %Total |
|------------|---------|---------|--------|
| All Events | 13,344  | ####    | 100.0  |
| P1         | 10,000  | 74.9    | 74.9   |
| P2         | 563     | 4.2     | 4.2    |

E. coli HSPs@glucan 48h

| Population | #Events | %Parent | FITC-A Mean |
|------------|---------|---------|-------------|
| All Events | 13,344  | ####    | 168         |
| P1         | 10,000  | 74.9    | 197         |
| P2         | 563     | 4.2     | 862         |

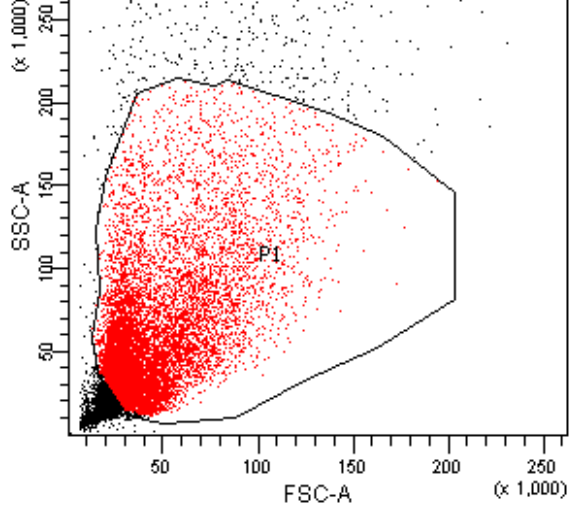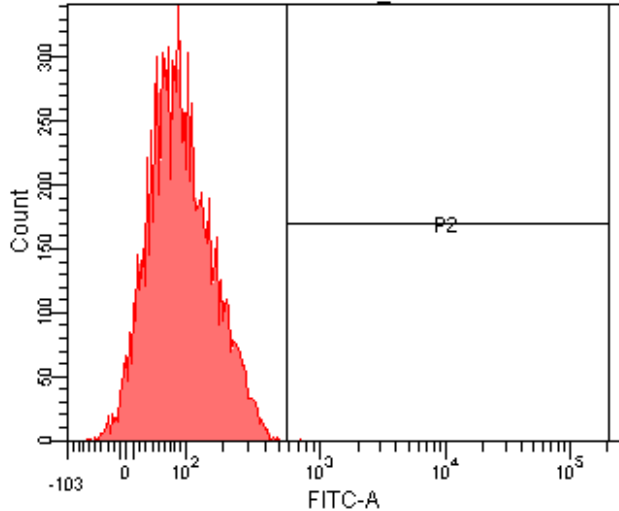

S. aureus HSPs 48h

| Population | #Events | %Parent | %Total |
|------------|---------|---------|--------|
| All Events | 13,394  | ####    | 100.0  |
| P1         | 10,000  | 74.7    | 74.7   |
| P2         | 89      | 0.7     | 0.7    |

S. aureus HSPs 48h

| Population | #Events | %Parent | FITC-A Mean |
|------------|---------|---------|-------------|
| All Events | 13,394  | ####    | 99          |
| P1         | 10,000  | 74.7    | 100         |
| P2         | 89      | 0.7     | 816         |

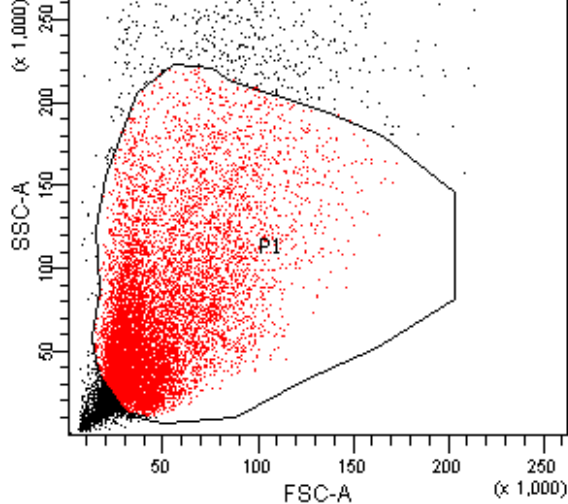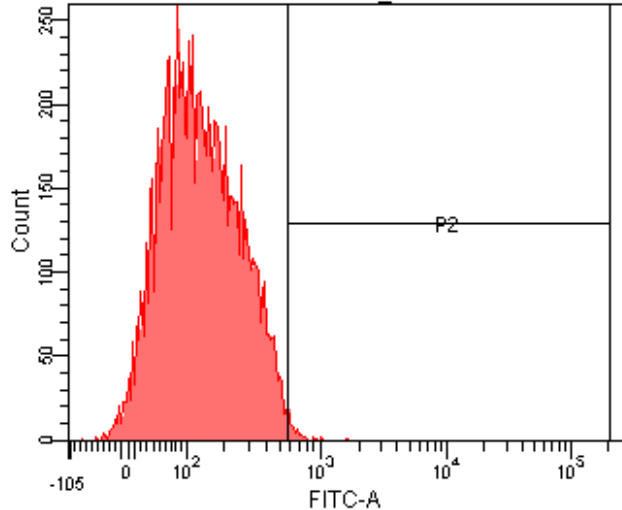

*S. aureus* HSPs@glucan 48h

| Population | #Events | %Parent | %Total |
|------------|---------|---------|--------|
| All Events | 12,931  | ####    | 100.0  |
| P1         | 10,000  | 77.3    | 77.3   |
| P2         | 504     | 3.9     | 3.9    |

*S. aureus* HSPs@glucan 48h

| Population | #Events | %Parent | FITC-A Mean |
|------------|---------|---------|-------------|
| All Events | 12,931  | ####    | 166         |
| P1         | 10,000  | 77.3    | 155         |
| P2         | 504     | 3.9     | 810         |
